# Supplementary material for: Mutations in SKI in Shprintzen–Goldberg syndrome lead to attenuated TGF-β responses through SKI stabilization
Source: eLife journal article supplement (doi:10.7554/elife.63545), 2021-01-08

26/11/2015 - 10:22:19

peptides generated from sequence-file :

E:\Multipep Spotter09CR-UK\Users\Caroline Hill\Ski 19 mutation.SEQ

| Nr. | Pos. | Mol.Weight | Sequence Label                                                        |
|-----|------|------------|-----------------------------------------------------------------------|
| 1   | A 1  | 3800.5     | F-Q-P-H-P-G-A-Q-K-T-L-E-Q-F-H-L-S-S-M-S-S-L-G-G-P-A-A-F-S-A-R-W-A-Q-E |
| 2   | A 2  | 3885.6     | F-Q-P-H-P-G-R-Q-K-T-L-E-Q-F-H-L-S-S-M-S-S-L-G-G-P-A-A-F-S-A-R-W-A-Q-E |
| 3   | A 3  | 3843.5     | F-Q-P-H-P-G-N-Q-K-T-L-E-Q-F-H-L-S-S-M-S-S-L-G-G-P-A-A-F-S-A-R-W-A-Q-E |
| 4   | A 4  | 3844.5     | F-Q-P-H-P-G-D-Q-K-T-L-E-Q-F-H-L-S-S-M-S-S-L-G-G-P-A-A-F-S-A-R-W-A-Q-E |
| 5   | A 5  | 3832.5     | F-Q-P-H-P-G-C-Q-K-T-L-E-Q-F-H-L-S-S-M-S-S-L-G-G-P-A-A-F-S-A-R-W-A-Q-E |
| 6   | A 6  | 3857.5     | F-Q-P-H-P-G-Q-Q-K-T-L-E-Q-F-H-L-S-S-M-S-S-L-G-G-P-A-A-F-S-A-R-W-A-Q-E |
| 7   | A 7  | 3858.5     | F-Q-P-H-P-G-E-Q-K-T-L-E-Q-F-H-L-S-S-M-S-S-L-G-G-P-A-A-F-S-A-R-W-A-Q-E |
| 8   | A 8  | 3786.5     | F-Q-P-H-P-G-G-Q-K-T-L-E-Q-F-H-L-S-S-M-S-S-L-G-G-P-A-A-F-S-A-R-W-A-Q-E |
| 9   | A 9  | 3866.5     | F-Q-P-H-P-G-H-Q-K-T-L-E-Q-F-H-L-S-S-M-S-S-L-G-G-P-A-A-F-S-A-R-W-A-Q-E |
| 10  | A10  | 3842.6     | F-Q-P-H-P-G-I-Q-K-T-L-E-Q-F-H-L-S-S-M-S-S-L-G-G-P-A-A-F-S-A-R-W-A-Q-E |
| 11  | A11  | 3842.6     | F-Q-P-H-P-G-L-Q-K-T-L-E-Q-F-H-L-S-S-M-S-S-L-G-G-P-A-A-F-S-A-R-W-A-Q-E |
| 12  | A12  | 3857.6     | F-Q-P-H-P-G-K-Q-K-T-L-E-Q-F-H-L-S-S-M-S-S-L-G-G-P-A-A-F-S-A-R-W-A-Q-E |
| 13  | A13  | 3860.6     | F-Q-P-H-P-G-M-Q-K-T-L-E-Q-F-H-L-S-S-M-S-S-L-G-G-P-A-A-F-S-A-R-W-A-Q-E |
| 14  | A14  | 3876.6     | F-Q-P-H-P-G-F-Q-K-T-L-E-Q-F-H-L-S-S-M-S-S-L-G-G-P-A-A-F-S-A-R-W-A-Q-E |
| 15  | A15  | 3826.5     | F-Q-P-H-P-G-P-Q-K-T-L-E-Q-F-H-L-S-S-M-S-S-L-G-G-P-A-A-F-S-A-R-W-A-Q-E |
| 16  | A16  | 3816.5     | F-Q-P-H-P-G-S-Q-K-T-L-E-Q-F-H-L-S-S-M-S-S-L-G-G-P-A-A-F-S-A-R-W-A-Q-E |
| 17  | A17  | 3830.5     | F-Q-P-H-P-G-T-Q-K-T-L-E-Q-F-H-L-S-S-M-S-S-L-G-G-P-A-A-F-S-A-R-W-A-Q-E |
| 18  | A18  | 3915.6     | F-Q-P-H-P-G-W-Q-K-T-L-E-Q-F-H-L-S-S-M-S-S-L-G-G-P-A-A-F-S-A-R-W-A-Q-E |
| 19  | A19  | 3892.6     | F-Q-P-H-P-G-Y-Q-K-T-L-E-Q-F-H-L-S-S-M-S-S-L-G-G-P-A-A-F-S-A-R-W-A-Q-E |
| 20  | A20  | 3828.5     | F-Q-P-H-P-G-V-Q-K-T-L-E-Q-F-H-L-S-S-M-S-S-L-G-G-P-A-A-F-S-A-R-W-A-Q-E |
| 21  | B 1  | 3785.6     | F-Q-P-H-P-G-L-A-K-T-L-E-Q-F-H-L-S-S-M-S-S-L-G-G-P-A-A-F-S-A-R-W-A-Q-E |
| 22  | B 2  | 3870.7     | F-Q-P-H-P-G-L-R-K-T-L-E-Q-F-H-L-S-S-M-S-S-L-G-G-P-A-A-F-S-A-R-W-A-Q-E |
| 23  | B 3  | 3828.6     | F-Q-P-H-P-G-L-N-K-T-L-E-Q-F-H-L-S-S-M-S-S-L-G-G-P-A-A-F-S-A-R-W-A-Q-E |
| 24  | B 4  | 3829.6     | F-Q-P-H-P-G-L-D-K-T-L-E-Q-F-H-L-S-S-M-S-S-L-G-G-P-A-A-F-S-A-R-W-A-Q-E |
| 25  | B 5  | 3817.6     | F-Q-P-H-P-G-L-C-K-T-L-E-Q-F-H-L-S-S-M-S-S-L-G-G-P-A-A-F-S-A-R-W-A-Q-E |

L-G-G-P-A-A-F-S-A-R-W-A-Q-E  
 26 B 6 3842.6 F-Q-P-H-P-G-L-Q-K-T-L-E-Q-F-H-L-S-S-M-S-S-  
 L-G-G-P-A-A-F-S-A-R-W-A-Q-E  
 27 B 7 3843.6 F-Q-P-H-P-G-L-E-K-T-L-E-Q-F-H-L-S-S-M-S-S-  
 L-G-G-P-A-A-F-S-A-R-W-A-Q-E  
 28 B 8 3771.6 F-Q-P-H-P-G-L-G-K-T-L-E-Q-F-H-L-S-S-M-S-S-  
 L-G-G-P-A-A-F-S-A-R-W-A-Q-E  
 29 B 9 3851.6 F-Q-P-H-P-G-L-H-K-T-L-E-Q-F-H-L-S-S-M-S-S-  
 L-G-G-P-A-A-F-S-A-R-W-A-Q-E  
 30 B10 3827.7 F-Q-P-H-P-G-L-I-K-T-L-E-Q-F-H-L-S-S-M-S-S-  
 L-G-G-P-A-A-F-S-A-R-W-A-Q-E  
 31 B11 3827.7 F-Q-P-H-P-G-L-L-K-T-L-E-Q-F-H-L-S-S-M-S-S-  
 L-G-G-P-A-A-F-S-A-R-W-A-Q-E  
 32 B12 3842.7 F-Q-P-H-P-G-L-K-K-T-L-E-Q-F-H-L-S-S-M-S-S-  
 L-G-G-P-A-A-F-S-A-R-W-A-Q-E  
 33 B13 3845.7 F-Q-P-H-P-G-L-M-K-T-L-E-Q-F-H-L-S-S-M-S-S-  
 L-G-G-P-A-A-F-S-A-R-W-A-Q-E  
 34 B14 3861.7 F-Q-P-H-P-G-L-F-K-T-L-E-Q-F-H-L-S-S-M-S-S-  
 L-G-G-P-A-A-F-S-A-R-W-A-Q-E  
 35 B15 3811.6 F-Q-P-H-P-G-L-P-K-T-L-E-Q-F-H-L-S-S-M-S-S-  
 L-G-G-P-A-A-F-S-A-R-W-A-Q-E  
 36 B16 3801.6 F-Q-P-H-P-G-L-S-K-T-L-E-Q-F-H-L-S-S-M-S-S-  
 L-G-G-P-A-A-F-S-A-R-W-A-Q-E  
 37 B17 3815.6 F-Q-P-H-P-G-L-T-K-T-L-E-Q-F-H-L-S-S-M-S-S-  
 L-G-G-P-A-A-F-S-A-R-W-A-Q-E  
 38 B18 3900.7 F-Q-P-H-P-G-L-W-K-T-L-E-Q-F-H-L-S-S-M-S-S-  
 L-G-G-P-A-A-F-S-A-R-W-A-Q-E  
 39 B19 3877.7 F-Q-P-H-P-G-L-Y-K-T-L-E-Q-F-H-L-S-S-M-S-S-  
 L-G-G-P-A-A-F-S-A-R-W-A-Q-E  
 40 B20 3813.6 F-Q-P-H-P-G-L-V-K-T-L-E-Q-F-H-L-S-S-M-S-S-  
 L-G-G-P-A-A-F-S-A-R-W-A-Q-E  
 41 C 1 3785.5 F-Q-P-H-P-G-L-Q-A-T-L-E-Q-F-H-L-S-S-M-S-S-  
 L-G-G-P-A-A-F-S-A-R-W-A-Q-E  
 42 C 2 3870.6 F-Q-P-H-P-G-L-Q-R-T-L-E-Q-F-H-L-S-S-M-S-S-  
 L-G-G-P-A-A-F-S-A-R-W-A-Q-E  
 43 C 3 3828.5 F-Q-P-H-P-G-L-Q-N-T-L-E-Q-F-H-L-S-S-M-S-S-  
 L-G-G-P-A-A-F-S-A-R-W-A-Q-E  
 44 C 4 3829.5 F-Q-P-H-P-G-L-Q-D-T-L-E-Q-F-H-L-S-S-M-S-S-  
 L-G-G-P-A-A-F-S-A-R-W-A-Q-E  
 45 C 5 3817.5 F-Q-P-H-P-G-L-Q-C-T-L-E-Q-F-H-L-S-S-M-S-S-  
 L-G-G-P-A-A-F-S-A-R-W-A-Q-E  
 46 C 6 3842.5 F-Q-P-H-P-G-L-Q-Q-T-L-E-Q-F-H-L-S-S-M-S-S-  
 L-G-G-P-A-A-F-S-A-R-W-A-Q-E  
 47 C 7 3843.5 F-Q-P-H-P-G-L-Q-E-T-L-E-Q-F-H-L-S-S-M-S-S-  
 L-G-G-P-A-A-F-S-A-R-W-A-Q-E  
 48 C 8 3771.5 F-Q-P-H-P-G-L-Q-G-T-L-E-Q-F-H-L-S-S-M-S-S-  
 L-G-G-P-A-A-F-S-A-R-W-A-Q-E  
 49 C 9 3851.5 F-Q-P-H-P-G-L-Q-H-T-L-E-Q-F-H-L-S-S-M-S-S-  
 L-G-G-P-A-A-F-S-A-R-W-A-Q-E  
 50 C10 3827.6 F-Q-P-H-P-G-L-Q-I-T-L-E-Q-F-H-L-S-S-M-S-S-  
 L-G-G-P-A-A-F-S-A-R-W-A-Q-E  
 51 C11 3827.6 F-Q-P-H-P-G-L-Q-L-T-L-E-Q-F-H-L-S-S-M-S-S-  
 L-G-G-P-A-A-F-S-A-R-W-A-Q-E  
 52 C12 3842.6 F-Q-P-H-P-G-L-Q-K-T-L-E-Q-F-H-L-S-S-M-S-S-

L-G-G-P-A-A-F-S-A-R-W-A-Q-E  
 53 C13 3845.6 F-Q-P-H-P-G-L-Q-M-T-L-E-Q-F-H-L-S-S-M-S-S-  
 L-G-G-P-A-A-F-S-A-R-W-A-Q-E  
 54 C14 3861.6 F-Q-P-H-P-G-L-Q-F-T-L-E-Q-F-H-L-S-S-M-S-S-  
 L-G-G-P-A-A-F-S-A-R-W-A-Q-E  
 55 C15 3811.5 F-Q-P-H-P-G-L-Q-P-T-L-E-Q-F-H-L-S-S-M-S-S-  
 L-G-G-P-A-A-F-S-A-R-W-A-Q-E  
 56 C16 3801.5 F-Q-P-H-P-G-L-Q-S-T-L-E-Q-F-H-L-S-S-M-S-S-  
 L-G-G-P-A-A-F-S-A-R-W-A-Q-E  
 57 C17 3815.5 F-Q-P-H-P-G-L-Q-T-T-L-E-Q-F-H-L-S-S-M-S-S-  
 L-G-G-P-A-A-F-S-A-R-W-A-Q-E  
 58 C18 3900.6 F-Q-P-H-P-G-L-Q-W-T-L-E-Q-F-H-L-S-S-M-S-S-  
 L-G-G-P-A-A-F-S-A-R-W-A-Q-E  
 59 C19 3877.6 F-Q-P-H-P-G-L-Q-Y-T-L-E-Q-F-H-L-S-S-M-S-S-  
 L-G-G-P-A-A-F-S-A-R-W-A-Q-E  
 60 C20 3813.5 F-Q-P-H-P-G-L-Q-V-T-L-E-Q-F-H-L-S-S-M-S-S-  
 L-G-G-P-A-A-F-S-A-R-W-A-Q-E  
 61 D 1 3812.6 F-Q-P-H-P-G-L-Q-K-A-L-E-Q-F-H-L-S-S-M-S-S-  
 L-G-G-P-A-A-F-S-A-R-W-A-Q-E  
 62 D 2 3897.7 F-Q-P-H-P-G-L-Q-K-R-L-E-Q-F-H-L-S-S-M-S-S-  
 L-G-G-P-A-A-F-S-A-R-W-A-Q-E  
 63 D 3 3855.6 F-Q-P-H-P-G-L-Q-K-N-L-E-Q-F-H-L-S-S-M-S-S-  
 L-G-G-P-A-A-F-S-A-R-W-A-Q-E  
 64 D 4 3856.6 F-Q-P-H-P-G-L-Q-K-D-L-E-Q-F-H-L-S-S-M-S-S-  
 L-G-G-P-A-A-F-S-A-R-W-A-Q-E  
 65 D 5 3844.6 F-Q-P-H-P-G-L-Q-K-C-L-E-Q-F-H-L-S-S-M-S-S-  
 L-G-G-P-A-A-F-S-A-R-W-A-Q-E  
 66 D 6 3869.6 F-Q-P-H-P-G-L-Q-K-Q-L-E-Q-F-H-L-S-S-M-S-S-  
 L-G-G-P-A-A-F-S-A-R-W-A-Q-E  
 67 D 7 3870.6 F-Q-P-H-P-G-L-Q-K-E-L-E-Q-F-H-L-S-S-M-S-S-  
 L-G-G-P-A-A-F-S-A-R-W-A-Q-E  
 68 D 8 3798.6 F-Q-P-H-P-G-L-Q-K-G-L-E-Q-F-H-L-S-S-M-S-S-  
 L-G-G-P-A-A-F-S-A-R-W-A-Q-E  
 69 D 9 3878.6 F-Q-P-H-P-G-L-Q-K-H-L-E-Q-F-H-L-S-S-M-S-S-  
 L-G-G-P-A-A-F-S-A-R-W-A-Q-E  
 70 D10 3854.7 F-Q-P-H-P-G-L-Q-K-I-L-E-Q-F-H-L-S-S-M-S-S-  
 L-G-G-P-A-A-F-S-A-R-W-A-Q-E  
 71 D11 3854.7 F-Q-P-H-P-G-L-Q-K-L-L-E-Q-F-H-L-S-S-M-S-S-  
 L-G-G-P-A-A-F-S-A-R-W-A-Q-E  
 72 D12 3869.7 F-Q-P-H-P-G-L-Q-K-K-L-E-Q-F-H-L-S-S-M-S-S-  
 L-G-G-P-A-A-F-S-A-R-W-A-Q-E  
 73 D13 3872.7 F-Q-P-H-P-G-L-Q-K-M-L-E-Q-F-H-L-S-S-M-S-S-  
 L-G-G-P-A-A-F-S-A-R-W-A-Q-E  
 74 D14 3888.7 F-Q-P-H-P-G-L-Q-K-F-L-E-Q-F-H-L-S-S-M-S-S-  
 L-G-G-P-A-A-F-S-A-R-W-A-Q-E  
 75 D15 3838.6 F-Q-P-H-P-G-L-Q-K-P-L-E-Q-F-H-L-S-S-M-S-S-  
 L-G-G-P-A-A-F-S-A-R-W-A-Q-E  
 76 D16 3828.6 F-Q-P-H-P-G-L-Q-K-S-L-E-Q-F-H-L-S-S-M-S-S-  
 L-G-G-P-A-A-F-S-A-R-W-A-Q-E  
 77 D17 3842.6 F-Q-P-H-P-G-L-Q-K-T-L-E-Q-F-H-L-S-S-M-S-S-  
 L-G-G-P-A-A-F-S-A-R-W-A-Q-E  
 78 D18 3927.7 F-Q-P-H-P-G-L-Q-K-W-L-E-Q-F-H-L-S-S-M-S-S-  
 L-G-G-P-A-A-F-S-A-R-W-A-Q-E  
 79 D19 3904.7 F-Q-P-H-P-G-L-Q-K-Y-L-E-Q-F-H-L-S-S-M-S-S-

L-G-G-P-A-A-F-S-A-R-W-A-Q-E  
 80 D20 3840.6 F-Q-P-H-P-G-L-Q-K-V-L-E-Q-F-H-L-S-S-M-S-S-  
 L-G-G-P-A-A-F-S-A-R-W-A-Q-E  
 81 E 1 3800.5 F-Q-P-H-P-G-L-Q-K-T-A-E-Q-F-H-L-S-S-M-S-S-  
 L-G-G-P-A-A-F-S-A-R-W-A-Q-E  
 82 E 2 3885.6 F-Q-P-H-P-G-L-Q-K-T-R-E-Q-F-H-L-S-S-M-S-S-  
 L-G-G-P-A-A-F-S-A-R-W-A-Q-E  
 83 E 3 3843.5 F-Q-P-H-P-G-L-Q-K-T-N-E-Q-F-H-L-S-S-M-S-S-  
 L-G-G-P-A-A-F-S-A-R-W-A-Q-E  
 84 E 4 3844.5 F-Q-P-H-P-G-L-Q-K-T-D-E-Q-F-H-L-S-S-M-S-S-  
 L-G-G-P-A-A-F-S-A-R-W-A-Q-E  
 85 E 5 3832.5 F-Q-P-H-P-G-L-Q-K-T-C-E-Q-F-H-L-S-S-M-S-S-  
 L-G-G-P-A-A-F-S-A-R-W-A-Q-E  
 86 E 6 3857.5 F-Q-P-H-P-G-L-Q-K-T-Q-E-Q-F-H-L-S-S-M-S-S-  
 L-G-G-P-A-A-F-S-A-R-W-A-Q-E  
 87 E 7 3858.5 F-Q-P-H-P-G-L-Q-K-T-E-E-Q-F-H-L-S-S-M-S-S-  
 L-G-G-P-A-A-F-S-A-R-W-A-Q-E  
 88 E 8 3786.5 F-Q-P-H-P-G-L-Q-K-T-G-E-Q-F-H-L-S-S-M-S-S-  
 L-G-G-P-A-A-F-S-A-R-W-A-Q-E  
 89 E 9 3866.5 F-Q-P-H-P-G-L-Q-K-T-H-E-Q-F-H-L-S-S-M-S-S-  
 L-G-G-P-A-A-F-S-A-R-W-A-Q-E  
 90 E10 3842.6 F-Q-P-H-P-G-L-Q-K-T-I-E-Q-F-H-L-S-S-M-S-S-  
 L-G-G-P-A-A-F-S-A-R-W-A-Q-E  
 91 E11 3842.6 F-Q-P-H-P-G-L-Q-K-T-L-E-Q-F-H-L-S-S-M-S-S-  
 L-G-G-P-A-A-F-S-A-R-W-A-Q-E  
 92 E12 3857.6 F-Q-P-H-P-G-L-Q-K-T-K-E-Q-F-H-L-S-S-M-S-S-  
 L-G-G-P-A-A-F-S-A-R-W-A-Q-E  
 93 E13 3860.6 F-Q-P-H-P-G-L-Q-K-T-M-E-Q-F-H-L-S-S-M-S-S-  
 L-G-G-P-A-A-F-S-A-R-W-A-Q-E  
 94 E14 3876.6 F-Q-P-H-P-G-L-Q-K-T-F-E-Q-F-H-L-S-S-M-S-S-  
 L-G-G-P-A-A-F-S-A-R-W-A-Q-E  
 95 E15 3826.5 F-Q-P-H-P-G-L-Q-K-T-P-E-Q-F-H-L-S-S-M-S-S-  
 L-G-G-P-A-A-F-S-A-R-W-A-Q-E  
 96 E16 3816.5 F-Q-P-H-P-G-L-Q-K-T-S-E-Q-F-H-L-S-S-M-S-S-  
 L-G-G-P-A-A-F-S-A-R-W-A-Q-E  
 97 E17 3830.5 F-Q-P-H-P-G-L-Q-K-T-T-E-Q-F-H-L-S-S-M-S-S-  
 L-G-G-P-A-A-F-S-A-R-W-A-Q-E  
 98 E18 3915.6 F-Q-P-H-P-G-L-Q-K-T-W-E-Q-F-H-L-S-S-M-S-S-  
 L-G-G-P-A-A-F-S-A-R-W-A-Q-E  
 99 E19 3892.6 F-Q-P-H-P-G-L-Q-K-T-Y-E-Q-F-H-L-S-S-M-S-S-  
 L-G-G-P-A-A-F-S-A-R-W-A-Q-E  
 100 E20 3828.5 F-Q-P-H-P-G-L-Q-K-T-V-E-Q-F-H-L-S-S-M-S-S-  
 L-G-G-P-A-A-F-S-A-R-W-A-Q-E  
 101 F 1 3784.6 F-Q-P-H-P-G-L-Q-K-T-L-A-Q-F-H-L-S-S-M-S-S-  
 L-G-G-P-A-A-F-S-A-R-W-A-Q-E  
 102 F 2 3869.7 F-Q-P-H-P-G-L-Q-K-T-L-R-Q-F-H-L-S-S-M-S-S-  
 L-G-G-P-A-A-F-S-A-R-W-A-Q-E  
 103 F 3 3827.6 F-Q-P-H-P-G-L-Q-K-T-L-N-Q-F-H-L-S-S-M-S-S-  
 L-G-G-P-A-A-F-S-A-R-W-A-Q-E  
 104 F 4 3828.6 F-Q-P-H-P-G-L-Q-K-T-L-D-Q-F-H-L-S-S-M-S-S-  
 L-G-G-P-A-A-F-S-A-R-W-A-Q-E  
 105 F 5 3816.6 F-Q-P-H-P-G-L-Q-K-T-L-C-Q-F-H-L-S-S-M-S-S-  
 L-G-G-P-A-A-F-S-A-R-W-A-Q-E  
 106 F 6 3841.6 F-Q-P-H-P-G-L-Q-K-T-L-Q-Q-F-H-L-S-S-M-S-S-

L-G-G-P-A-A-F-S-A-R-W-A-Q-E  
107 F 7 3842.6 F-Q-P-H-P-G-L-Q-K-T-L-E-Q-F-H-L-S-S-M-S-S-  
L-G-G-P-A-A-F-S-A-R-W-A-Q-E  
108 F 8 3770.6 F-Q-P-H-P-G-L-Q-K-T-L-G-Q-F-H-L-S-S-M-S-S-  
L-G-G-P-A-A-F-S-A-R-W-A-Q-E  
109 F 9 3850.6 F-Q-P-H-P-G-L-Q-K-T-L-H-Q-F-H-L-S-S-M-S-S-  
L-G-G-P-A-A-F-S-A-R-W-A-Q-E  
110 F10 3826.7 F-Q-P-H-P-G-L-Q-K-T-L-I-Q-F-H-L-S-S-M-S-S-  
L-G-G-P-A-A-F-S-A-R-W-A-Q-E  
111 F11 3826.7 F-Q-P-H-P-G-L-Q-K-T-L-L-Q-F-H-L-S-S-M-S-S-  
L-G-G-P-A-A-F-S-A-R-W-A-Q-E  
112 F12 3841.7 F-Q-P-H-P-G-L-Q-K-T-L-K-Q-F-H-L-S-S-M-S-S-  
L-G-G-P-A-A-F-S-A-R-W-A-Q-E  
113 F13 3844.7 F-Q-P-H-P-G-L-Q-K-T-L-M-Q-F-H-L-S-S-M-S-S-  
L-G-G-P-A-A-F-S-A-R-W-A-Q-E  
114 F14 3860.7 F-Q-P-H-P-G-L-Q-K-T-L-F-Q-F-H-L-S-S-M-S-S-  
L-G-G-P-A-A-F-S-A-R-W-A-Q-E  
115 F15 3810.6 F-Q-P-H-P-G-L-Q-K-T-L-P-Q-F-H-L-S-S-M-S-S-  
L-G-G-P-A-A-F-S-A-R-W-A-Q-E  
116 F16 3800.6 F-Q-P-H-P-G-L-Q-K-T-L-S-Q-F-H-L-S-S-M-S-S-  
L-G-G-P-A-A-F-S-A-R-W-A-Q-E  
117 F17 3814.6 F-Q-P-H-P-G-L-Q-K-T-L-T-Q-F-H-L-S-S-M-S-S-  
L-G-G-P-A-A-F-S-A-R-W-A-Q-E  
118 F18 3899.7 F-Q-P-H-P-G-L-Q-K-T-L-W-Q-F-H-L-S-S-M-S-S-  
L-G-G-P-A-A-F-S-A-R-W-A-Q-E  
119 F19 3876.7 F-Q-P-H-P-G-L-Q-K-T-L-Y-Q-F-H-L-S-S-M-S-S-  
L-G-G-P-A-A-F-S-A-R-W-A-Q-E  
120 F20 3812.6 F-Q-P-H-P-G-L-Q-K-T-L-V-Q-F-H-L-S-S-M-S-S-  
L-G-G-P-A-A-F-S-A-R-W-A-Q-E  
121 G 1 3785.6 F-Q-P-H-P-G-L-Q-K-T-L-E-A-F-H-L-S-S-M-S-S-  
L-G-G-P-A-A-F-S-A-R-W-A-Q-E  
122 G 2 3870.7 F-Q-P-H-P-G-L-Q-K-T-L-E-R-F-H-L-S-S-M-S-S-  
L-G-G-P-A-A-F-S-A-R-W-A-Q-E  
123 G 3 3828.6 F-Q-P-H-P-G-L-Q-K-T-L-E-N-F-H-L-S-S-M-S-S-  
L-G-G-P-A-A-F-S-A-R-W-A-Q-E  
124 G 4 3829.6 F-Q-P-H-P-G-L-Q-K-T-L-E-D-F-H-L-S-S-M-S-S-  
L-G-G-P-A-A-F-S-A-R-W-A-Q-E  
125 G 5 3817.6 F-Q-P-H-P-G-L-Q-K-T-L-E-C-F-H-L-S-S-M-S-S-  
L-G-G-P-A-A-F-S-A-R-W-A-Q-E  
126 G 6 3842.6 F-Q-P-H-P-G-L-Q-K-T-L-E-Q-F-H-L-S-S-M-S-S-  
L-G-G-P-A-A-F-S-A-R-W-A-Q-E  
127 G 7 3843.6 F-Q-P-H-P-G-L-Q-K-T-L-E-E-F-H-L-S-S-M-S-S-  
L-G-G-P-A-A-F-S-A-R-W-A-Q-E  
128 G 8 3771.6 F-Q-P-H-P-G-L-Q-K-T-L-E-G-F-H-L-S-S-M-S-S-  
L-G-G-P-A-A-F-S-A-R-W-A-Q-E  
129 G 9 3851.6 F-Q-P-H-P-G-L-Q-K-T-L-E-H-F-H-L-S-S-M-S-S-  
L-G-G-P-A-A-F-S-A-R-W-A-Q-E  
130 G10 3827.7 F-Q-P-H-P-G-L-Q-K-T-L-E-I-F-H-L-S-S-M-S-S-  
L-G-G-P-A-A-F-S-A-R-W-A-Q-E  
131 G11 3827.7 F-Q-P-H-P-G-L-Q-K-T-L-E-L-F-H-L-S-S-M-S-S-  
L-G-G-P-A-A-F-S-A-R-W-A-Q-E  
132 G12 3842.7 F-Q-P-H-P-G-L-Q-K-T-L-E-K-F-H-L-S-S-M-S-S-  
L-G-G-P-A-A-F-S-A-R-W-A-Q-E  
133 G13 3845.7 F-Q-P-H-P-G-L-Q-K-T-L-E-M-F-H-L-S-S-M-S-S-

L-G-G-P-A-A-F-S-A-R-W-A-Q-E  
 134 G14 3861.7 F-Q-P-H-P-G-L-Q-K-T-L-E-F-F-H-L-S-S-M-S-S-  
 L-G-G-P-A-A-F-S-A-R-W-A-Q-E  
 135 G15 3811.6 F-Q-P-H-P-G-L-Q-K-T-L-E-P-F-H-L-S-S-M-S-S-  
 L-G-G-P-A-A-F-S-A-R-W-A-Q-E  
 136 G16 3801.6 F-Q-P-H-P-G-L-Q-K-T-L-E-S-F-H-L-S-S-M-S-S-  
 L-G-G-P-A-A-F-S-A-R-W-A-Q-E  
 137 G17 3815.6 F-Q-P-H-P-G-L-Q-K-T-L-E-T-F-H-L-S-S-M-S-S-  
 L-G-G-P-A-A-F-S-A-R-W-A-Q-E  
 138 G18 3900.7 F-Q-P-H-P-G-L-Q-K-T-L-E-W-F-H-L-S-S-M-S-S-  
 L-G-G-P-A-A-F-S-A-R-W-A-Q-E  
 139 G19 3877.7 F-Q-P-H-P-G-L-Q-K-T-L-E-Y-F-H-L-S-S-M-S-S-  
 L-G-G-P-A-A-F-S-A-R-W-A-Q-E  
 140 G20 3813.6 F-Q-P-H-P-G-L-Q-K-T-L-E-V-F-H-L-S-S-M-S-S-  
 L-G-G-P-A-A-F-S-A-R-W-A-Q-E  
 141 H 1 3766.5 F-Q-P-H-P-G-L-Q-K-T-L-E-Q-A-H-L-S-S-M-S-S-  
 L-G-G-P-A-A-F-S-A-R-W-A-Q-E  
 142 H 2 3851.6 F-Q-P-H-P-G-L-Q-K-T-L-E-Q-R-H-L-S-S-M-S-S-  
 L-G-G-P-A-A-F-S-A-R-W-A-Q-E  
 143 H 3 3809.5 F-Q-P-H-P-G-L-Q-K-T-L-E-Q-N-H-L-S-S-M-S-S-  
 L-G-G-P-A-A-F-S-A-R-W-A-Q-E  
 144 H 4 3810.5 F-Q-P-H-P-G-L-Q-K-T-L-E-Q-D-H-L-S-S-M-S-S-  
 L-G-G-P-A-A-F-S-A-R-W-A-Q-E  
 145 H 5 3798.5 F-Q-P-H-P-G-L-Q-K-T-L-E-Q-C-H-L-S-S-M-S-S-  
 L-G-G-P-A-A-F-S-A-R-W-A-Q-E  
 146 H 6 3823.5 F-Q-P-H-P-G-L-Q-K-T-L-E-Q-Q-H-L-S-S-M-S-S-  
 L-G-G-P-A-A-F-S-A-R-W-A-Q-E  
 147 H 7 3824.5 F-Q-P-H-P-G-L-Q-K-T-L-E-Q-E-H-L-S-S-M-S-S-  
 L-G-G-P-A-A-F-S-A-R-W-A-Q-E  
 148 H 8 3752.5 F-Q-P-H-P-G-L-Q-K-T-L-E-Q-G-H-L-S-S-M-S-S-  
 L-G-G-P-A-A-F-S-A-R-W-A-Q-E  
 149 H 9 3832.5 F-Q-P-H-P-G-L-Q-K-T-L-E-Q-H-H-L-S-S-M-S-S-  
 L-G-G-P-A-A-F-S-A-R-W-A-Q-E  
 150 H10 3808.6 F-Q-P-H-P-G-L-Q-K-T-L-E-Q-I-H-L-S-S-M-S-S-  
 L-G-G-P-A-A-F-S-A-R-W-A-Q-E  
 151 H11 3808.6 F-Q-P-H-P-G-L-Q-K-T-L-E-Q-L-H-L-S-S-M-S-S-  
 L-G-G-P-A-A-F-S-A-R-W-A-Q-E  
 152 H12 3823.6 F-Q-P-H-P-G-L-Q-K-T-L-E-Q-K-H-L-S-S-M-S-S-  
 L-G-G-P-A-A-F-S-A-R-W-A-Q-E  
 153 H13 3826.6 F-Q-P-H-P-G-L-Q-K-T-L-E-Q-M-H-L-S-S-M-S-S-  
 L-G-G-P-A-A-F-S-A-R-W-A-Q-E  
 154 H14 3842.6 F-Q-P-H-P-G-L-Q-K-T-L-E-Q-F-H-L-S-S-M-S-S-  
 L-G-G-P-A-A-F-S-A-R-W-A-Q-E  
 155 H15 3792.5 F-Q-P-H-P-G-L-Q-K-T-L-E-Q-P-H-L-S-S-M-S-S-  
 L-G-G-P-A-A-F-S-A-R-W-A-Q-E  
 156 H16 3782.5 F-Q-P-H-P-G-L-Q-K-T-L-E-Q-S-H-L-S-S-M-S-S-  
 L-G-G-P-A-A-F-S-A-R-W-A-Q-E  
 157 H17 3796.5 F-Q-P-H-P-G-L-Q-K-T-L-E-Q-T-H-L-S-S-M-S-S-  
 L-G-G-P-A-A-F-S-A-R-W-A-Q-E  
 158 H18 3881.6 F-Q-P-H-P-G-L-Q-K-T-L-E-Q-W-H-L-S-S-M-S-S-  
 L-G-G-P-A-A-F-S-A-R-W-A-Q-E  
 159 H19 3858.6 F-Q-P-H-P-G-L-Q-K-T-L-E-Q-Y-H-L-S-S-M-S-S-  
 L-G-G-P-A-A-F-S-A-R-W-A-Q-E  
 160 H20 3794.5 F-Q-P-H-P-G-L-Q-K-T-L-E-Q-V-H-L-S-S-M-S-S-

L-G-G-P-A-A-F-S-A-R-W-A-Q-E  
 161 I 1 3776.6 F-Q-P-H-P-G-L-Q-K-T-L-E-Q-F-A-L-S-S-M-S-S-  
 L-G-G-P-A-A-F-S-A-R-W-A-Q-E  
 162 I 2 3861.7 F-Q-P-H-P-G-L-Q-K-T-L-E-Q-F-R-L-S-S-M-S-S-  
 L-G-G-P-A-A-F-S-A-R-W-A-Q-E  
 163 I 3 3819.6 F-Q-P-H-P-G-L-Q-K-T-L-E-Q-F-N-L-S-S-M-S-S-  
 L-G-G-P-A-A-F-S-A-R-W-A-Q-E  
 164 I 4 3820.6 F-Q-P-H-P-G-L-Q-K-T-L-E-Q-F-D-L-S-S-M-S-S-  
 L-G-G-P-A-A-F-S-A-R-W-A-Q-E  
 165 I 5 3808.6 F-Q-P-H-P-G-L-Q-K-T-L-E-Q-F-C-L-S-S-M-S-S-  
 L-G-G-P-A-A-F-S-A-R-W-A-Q-E  
 166 I 6 3833.6 F-Q-P-H-P-G-L-Q-K-T-L-E-Q-F-Q-L-S-S-M-S-S-  
 L-G-G-P-A-A-F-S-A-R-W-A-Q-E  
 167 I 7 3834.6 F-Q-P-H-P-G-L-Q-K-T-L-E-Q-F-E-L-S-S-M-S-S-  
 L-G-G-P-A-A-F-S-A-R-W-A-Q-E  
 168 I 8 3762.6 F-Q-P-H-P-G-L-Q-K-T-L-E-Q-F-G-L-S-S-M-S-S-  
 L-G-G-P-A-A-F-S-A-R-W-A-Q-E  
 169 I 9 3842.6 F-Q-P-H-P-G-L-Q-K-T-L-E-Q-F-H-L-S-S-M-S-S-  
 L-G-G-P-A-A-F-S-A-R-W-A-Q-E  
 170 I10 3818.7 F-Q-P-H-P-G-L-Q-K-T-L-E-Q-F-I-L-S-S-M-S-S-  
 L-G-G-P-A-A-F-S-A-R-W-A-Q-E  
 171 I11 3818.7 F-Q-P-H-P-G-L-Q-K-T-L-E-Q-F-L-L-S-S-M-S-S-  
 L-G-G-P-A-A-F-S-A-R-W-A-Q-E  
 172 I12 3833.7 F-Q-P-H-P-G-L-Q-K-T-L-E-Q-F-K-L-S-S-M-S-S-  
 L-G-G-P-A-A-F-S-A-R-W-A-Q-E  
 173 I13 3836.7 F-Q-P-H-P-G-L-Q-K-T-L-E-Q-F-M-L-S-S-M-S-S-  
 L-G-G-P-A-A-F-S-A-R-W-A-Q-E  
 174 I14 3852.7 F-Q-P-H-P-G-L-Q-K-T-L-E-Q-F-F-L-S-S-M-S-S-  
 L-G-G-P-A-A-F-S-A-R-W-A-Q-E  
 175 I15 3802.6 F-Q-P-H-P-G-L-Q-K-T-L-E-Q-F-P-L-S-S-M-S-S-  
 L-G-G-P-A-A-F-S-A-R-W-A-Q-E  
 176 I16 3792.6 F-Q-P-H-P-G-L-Q-K-T-L-E-Q-F-S-L-S-S-M-S-S-  
 L-G-G-P-A-A-F-S-A-R-W-A-Q-E  
 177 I17 3806.6 F-Q-P-H-P-G-L-Q-K-T-L-E-Q-F-T-L-S-S-M-S-S-  
 L-G-G-P-A-A-F-S-A-R-W-A-Q-E  
 178 I18 3891.7 F-Q-P-H-P-G-L-Q-K-T-L-E-Q-F-W-L-S-S-M-S-S-  
 L-G-G-P-A-A-F-S-A-R-W-A-Q-E  
 179 I19 3868.7 F-Q-P-H-P-G-L-Q-K-T-L-E-Q-F-Y-L-S-S-M-S-S-  
 L-G-G-P-A-A-F-S-A-R-W-A-Q-E  
 180 I20 3804.6 F-Q-P-H-P-G-L-Q-K-T-L-E-Q-F-V-L-S-S-M-S-S-  
 L-G-G-P-A-A-F-S-A-R-W-A-Q-E  
 181 J 1 3800.5 F-Q-P-H-P-G-L-Q-K-T-L-E-Q-F-H-A-S-S-M-S-S-  
 L-G-G-P-A-A-F-S-A-R-W-A-Q-E  
 182 J 2 3885.6 F-Q-P-H-P-G-L-Q-K-T-L-E-Q-F-H-R-S-S-M-S-S-  
 L-G-G-P-A-A-F-S-A-R-W-A-Q-E  
 183 J 3 3843.5 F-Q-P-H-P-G-L-Q-K-T-L-E-Q-F-H-N-S-S-M-S-S-  
 L-G-G-P-A-A-F-S-A-R-W-A-Q-E  
 184 J 4 3844.5 F-Q-P-H-P-G-L-Q-K-T-L-E-Q-F-H-D-S-S-M-S-S-  
 L-G-G-P-A-A-F-S-A-R-W-A-Q-E  
 185 J 5 3832.5 F-Q-P-H-P-G-L-Q-K-T-L-E-Q-F-H-C-S-S-M-S-S-  
 L-G-G-P-A-A-F-S-A-R-W-A-Q-E  
 186 J 6 3857.5 F-Q-P-H-P-G-L-Q-K-T-L-E-Q-F-H-Q-S-S-M-S-S-  
 L-G-G-P-A-A-F-S-A-R-W-A-Q-E  
 187 J 7 3858.5 F-Q-P-H-P-G-L-Q-K-T-L-E-Q-F-H-E-S-S-M-S-S-

L-G-G-P-A-A-F-S-A-R-W-A-Q-E  
 188 J 8 3786.5 F-Q-P-H-P-G-L-Q-K-T-L-E-Q-F-H-G-S-S-M-S-S-  
 L-G-G-P-A-A-F-S-A-R-W-A-Q-E  
 189 J 9 3866.5 F-Q-P-H-P-G-L-Q-K-T-L-E-Q-F-H-H-S-S-M-S-S-  
 L-G-G-P-A-A-F-S-A-R-W-A-Q-E  
 190 J10 3842.6 F-Q-P-H-P-G-L-Q-K-T-L-E-Q-F-H-I-S-S-M-S-S-  
 L-G-G-P-A-A-F-S-A-R-W-A-Q-E  
 191 J11 3842.6 F-Q-P-H-P-G-L-Q-K-T-L-E-Q-F-H-L-S-S-M-S-S-  
 L-G-G-P-A-A-F-S-A-R-W-A-Q-E  
 192 J12 3857.6 F-Q-P-H-P-G-L-Q-K-T-L-E-Q-F-H-K-S-S-M-S-S-  
 L-G-G-P-A-A-F-S-A-R-W-A-Q-E  
 193 J13 3860.6 F-Q-P-H-P-G-L-Q-K-T-L-E-Q-F-H-M-S-S-M-S-S-  
 L-G-G-P-A-A-F-S-A-R-W-A-Q-E  
 194 J14 3876.6 F-Q-P-H-P-G-L-Q-K-T-L-E-Q-F-H-F-S-S-M-S-S-  
 L-G-G-P-A-A-F-S-A-R-W-A-Q-E  
 195 J15 3826.5 F-Q-P-H-P-G-L-Q-K-T-L-E-Q-F-H-P-S-S-M-S-S-  
 L-G-G-P-A-A-F-S-A-R-W-A-Q-E  
 196 J16 3816.5 F-Q-P-H-P-G-L-Q-K-T-L-E-Q-F-H-S-S-S-M-S-S-  
 L-G-G-P-A-A-F-S-A-R-W-A-Q-E  
 197 J17 3830.5 F-Q-P-H-P-G-L-Q-K-T-L-E-Q-F-H-T-S-S-M-S-S-  
 L-G-G-P-A-A-F-S-A-R-W-A-Q-E  
 198 J18 3915.6 F-Q-P-H-P-G-L-Q-K-T-L-E-Q-F-H-W-S-S-M-S-S-  
 L-G-G-P-A-A-F-S-A-R-W-A-Q-E  
 199 J19 3892.6 F-Q-P-H-P-G-L-Q-K-T-L-E-Q-F-H-Y-S-S-M-S-S-  
 L-G-G-P-A-A-F-S-A-R-W-A-Q-E  
 200 J20 3828.5 F-Q-P-H-P-G-L-Q-K-T-L-E-Q-F-H-V-S-S-M-S-S-  
 L-G-G-P-A-A-F-S-A-R-W-A-Q-E  
 201 K 1 3826.6 F-Q-P-H-P-G-L-Q-K-T-L-E-Q-F-H-L-A-S-M-S-S-  
 L-G-G-P-A-A-F-S-A-R-W-A-Q-E  
 202 K 2 3911.7 F-Q-P-H-P-G-L-Q-K-T-L-E-Q-F-H-L-R-S-M-S-S-  
 L-G-G-P-A-A-F-S-A-R-W-A-Q-E  
 203 K 3 3869.6 F-Q-P-H-P-G-L-Q-K-T-L-E-Q-F-H-L-N-S-M-S-S-  
 L-G-G-P-A-A-F-S-A-R-W-A-Q-E  
 204 K 4 3870.6 F-Q-P-H-P-G-L-Q-K-T-L-E-Q-F-H-L-D-S-M-S-S-  
 L-G-G-P-A-A-F-S-A-R-W-A-Q-E  
 205 K 5 3858.6 F-Q-P-H-P-G-L-Q-K-T-L-E-Q-F-H-L-C-S-M-S-S-  
 L-G-G-P-A-A-F-S-A-R-W-A-Q-E  
 206 K 6 3883.6 F-Q-P-H-P-G-L-Q-K-T-L-E-Q-F-H-L-Q-S-M-S-S-  
 L-G-G-P-A-A-F-S-A-R-W-A-Q-E  
 207 K 7 3884.6 F-Q-P-H-P-G-L-Q-K-T-L-E-Q-F-H-L-E-S-M-S-S-  
 L-G-G-P-A-A-F-S-A-R-W-A-Q-E  
 208 K 8 3812.6 F-Q-P-H-P-G-L-Q-K-T-L-E-Q-F-H-L-G-S-M-S-S-  
 L-G-G-P-A-A-F-S-A-R-W-A-Q-E  
 209 K 9 3892.6 F-Q-P-H-P-G-L-Q-K-T-L-E-Q-F-H-L-H-S-M-S-S-  
 L-G-G-P-A-A-F-S-A-R-W-A-Q-E  
 210 K10 3868.7 F-Q-P-H-P-G-L-Q-K-T-L-E-Q-F-H-L-I-S-M-S-S-  
 L-G-G-P-A-A-F-S-A-R-W-A-Q-E  
 211 K11 3868.7 F-Q-P-H-P-G-L-Q-K-T-L-E-Q-F-H-L-L-S-M-S-S-  
 L-G-G-P-A-A-F-S-A-R-W-A-Q-E  
 212 K12 3883.7 F-Q-P-H-P-G-L-Q-K-T-L-E-Q-F-H-L-K-S-M-S-S-  
 L-G-G-P-A-A-F-S-A-R-W-A-Q-E  
 213 K13 3886.7 F-Q-P-H-P-G-L-Q-K-T-L-E-Q-F-H-L-M-S-M-S-S-  
 L-G-G-P-A-A-F-S-A-R-W-A-Q-E  
 214 K14 3902.7 F-Q-P-H-P-G-L-Q-K-T-L-E-Q-F-H-L-F-S-M-S-S-

L-G-G-P-A-A-F-S-A-R-W-A-Q-E  
215 K15 3852.6 F-Q-P-H-P-G-L-Q-K-T-L-E-Q-F-H-L-P-S-M-S-S-  
L-G-G-P-A-A-F-S-A-R-W-A-Q-E  
216 K16 3842.6 F-Q-P-H-P-G-L-Q-K-T-L-E-Q-F-H-L-S-S-M-S-S-  
L-G-G-P-A-A-F-S-A-R-W-A-Q-E  
217 K17 3856.6 F-Q-P-H-P-G-L-Q-K-T-L-E-Q-F-H-L-T-S-M-S-S-  
L-G-G-P-A-A-F-S-A-R-W-A-Q-E  
218 K18 3941.7 F-Q-P-H-P-G-L-Q-K-T-L-E-Q-F-H-L-W-S-M-S-S-  
L-G-G-P-A-A-F-S-A-R-W-A-Q-E  
219 K19 3918.7 F-Q-P-H-P-G-L-Q-K-T-L-E-Q-F-H-L-Y-S-M-S-S-  
L-G-G-P-A-A-F-S-A-R-W-A-Q-E  
220 K20 3854.6 F-Q-P-H-P-G-L-Q-K-T-L-E-Q-F-H-L-V-S-M-S-S-  
L-G-G-P-A-A-F-S-A-R-W-A-Q-E  
221 L 1 3826.6 F-Q-P-H-P-G-L-Q-K-T-L-E-Q-F-H-L-S-A-M-S-S-  
L-G-G-P-A-A-F-S-A-R-W-A-Q-E  
222 L 2 3911.7 F-Q-P-H-P-G-L-Q-K-T-L-E-Q-F-H-L-S-R-M-S-S-  
L-G-G-P-A-A-F-S-A-R-W-A-Q-E  
223 L 3 3869.6 F-Q-P-H-P-G-L-Q-K-T-L-E-Q-F-H-L-S-N-M-S-S-  
L-G-G-P-A-A-F-S-A-R-W-A-Q-E  
224 L 4 3870.6 F-Q-P-H-P-G-L-Q-K-T-L-E-Q-F-H-L-S-D-M-S-S-  
L-G-G-P-A-A-F-S-A-R-W-A-Q-E  
225 L 5 3858.6 F-Q-P-H-P-G-L-Q-K-T-L-E-Q-F-H-L-S-C-M-S-S-  
L-G-G-P-A-A-F-S-A-R-W-A-Q-E  
226 L 6 3883.6 F-Q-P-H-P-G-L-Q-K-T-L-E-Q-F-H-L-S-Q-M-S-S-  
L-G-G-P-A-A-F-S-A-R-W-A-Q-E  
227 L 7 3884.6 F-Q-P-H-P-G-L-Q-K-T-L-E-Q-F-H-L-S-E-M-S-S-  
L-G-G-P-A-A-F-S-A-R-W-A-Q-E  
228 L 8 3812.6 F-Q-P-H-P-G-L-Q-K-T-L-E-Q-F-H-L-S-G-M-S-S-  
L-G-G-P-A-A-F-S-A-R-W-A-Q-E  
229 L 9 3892.6 F-Q-P-H-P-G-L-Q-K-T-L-E-Q-F-H-L-S-H-M-S-S-  
L-G-G-P-A-A-F-S-A-R-W-A-Q-E  
230 L10 3868.7 F-Q-P-H-P-G-L-Q-K-T-L-E-Q-F-H-L-S-I-M-S-S-  
L-G-G-P-A-A-F-S-A-R-W-A-Q-E  
231 L11 3868.7 F-Q-P-H-P-G-L-Q-K-T-L-E-Q-F-H-L-S-L-M-S-S-  
L-G-G-P-A-A-F-S-A-R-W-A-Q-E  
232 L12 3883.7 F-Q-P-H-P-G-L-Q-K-T-L-E-Q-F-H-L-S-K-M-S-S-  
L-G-G-P-A-A-F-S-A-R-W-A-Q-E  
233 L13 3886.7 F-Q-P-H-P-G-L-Q-K-T-L-E-Q-F-H-L-S-M-M-S-S-  
L-G-G-P-A-A-F-S-A-R-W-A-Q-E  
234 L14 3902.7 F-Q-P-H-P-G-L-Q-K-T-L-E-Q-F-H-L-S-F-M-S-S-  
L-G-G-P-A-A-F-S-A-R-W-A-Q-E  
235 L15 3852.6 F-Q-P-H-P-G-L-Q-K-T-L-E-Q-F-H-L-S-P-M-S-S-  
L-G-G-P-A-A-F-S-A-R-W-A-Q-E  
236 L16 3842.6 F-Q-P-H-P-G-L-Q-K-T-L-E-Q-F-H-L-S-S-M-S-S-  
L-G-G-P-A-A-F-S-A-R-W-A-Q-E  
237 L17 3856.6 F-Q-P-H-P-G-L-Q-K-T-L-E-Q-F-H-L-S-T-M-S-S-  
L-G-G-P-A-A-F-S-A-R-W-A-Q-E  
238 L18 3941.7 F-Q-P-H-P-G-L-Q-K-T-L-E-Q-F-H-L-S-W-M-S-S-  
L-G-G-P-A-A-F-S-A-R-W-A-Q-E  
239 L19 3918.7 F-Q-P-H-P-G-L-Q-K-T-L-E-Q-F-H-L-S-Y-M-S-S-  
L-G-G-P-A-A-F-S-A-R-W-A-Q-E  
240 L20 3854.6 F-Q-P-H-P-G-L-Q-K-T-L-E-Q-F-H-L-S-V-M-S-S-  
L-G-G-P-A-A-F-S-A-R-W-A-Q-E  
241 M 1 3782.5 F-Q-P-H-P-G-L-Q-K-T-L-E-Q-F-H-L-S-S-A-S-S-

L-G-G-P-A-A-F-S-A-R-W-A-Q-E  
242 M 2 3867.6 F-Q-P-H-P-G-L-Q-K-T-L-E-Q-F-H-L-S-S-R-S-S-  
L-G-G-P-A-A-F-S-A-R-W-A-Q-E  
243 M 3 3825.5 F-Q-P-H-P-G-L-Q-K-T-L-E-Q-F-H-L-S-S-N-S-S-  
L-G-G-P-A-A-F-S-A-R-W-A-Q-E  
244 M 4 3826.5 F-Q-P-H-P-G-L-Q-K-T-L-E-Q-F-H-L-S-S-D-S-S-  
L-G-G-P-A-A-F-S-A-R-W-A-Q-E  
245 M 5 3814.5 F-Q-P-H-P-G-L-Q-K-T-L-E-Q-F-H-L-S-S-C-S-S-  
L-G-G-P-A-A-F-S-A-R-W-A-Q-E  
246 M 6 3839.5 F-Q-P-H-P-G-L-Q-K-T-L-E-Q-F-H-L-S-S-Q-S-S-  
L-G-G-P-A-A-F-S-A-R-W-A-Q-E  
247 M 7 3840.5 F-Q-P-H-P-G-L-Q-K-T-L-E-Q-F-H-L-S-S-E-S-S-  
L-G-G-P-A-A-F-S-A-R-W-A-Q-E  
248 M 8 3768.5 F-Q-P-H-P-G-L-Q-K-T-L-E-Q-F-H-L-S-S-G-S-S-  
L-G-G-P-A-A-F-S-A-R-W-A-Q-E  
249 M 9 3848.5 F-Q-P-H-P-G-L-Q-K-T-L-E-Q-F-H-L-S-S-H-S-S-  
L-G-G-P-A-A-F-S-A-R-W-A-Q-E  
250 M10 3824.6 F-Q-P-H-P-G-L-Q-K-T-L-E-Q-F-H-L-S-S-I-S-S-  
L-G-G-P-A-A-F-S-A-R-W-A-Q-E  
251 M11 3824.6 F-Q-P-H-P-G-L-Q-K-T-L-E-Q-F-H-L-S-S-L-S-S-  
L-G-G-P-A-A-F-S-A-R-W-A-Q-E  
252 M12 3839.6 F-Q-P-H-P-G-L-Q-K-T-L-E-Q-F-H-L-S-S-K-S-S-  
L-G-G-P-A-A-F-S-A-R-W-A-Q-E  
253 M13 3842.6 F-Q-P-H-P-G-L-Q-K-T-L-E-Q-F-H-L-S-S-M-S-S-  
L-G-G-P-A-A-F-S-A-R-W-A-Q-E  
254 M14 3858.6 F-Q-P-H-P-G-L-Q-K-T-L-E-Q-F-H-L-S-S-F-S-S-  
L-G-G-P-A-A-F-S-A-R-W-A-Q-E  
255 M15 3808.5 F-Q-P-H-P-G-L-Q-K-T-L-E-Q-F-H-L-S-S-P-S-S-  
L-G-G-P-A-A-F-S-A-R-W-A-Q-E  
256 M16 3798.5 F-Q-P-H-P-G-L-Q-K-T-L-E-Q-F-H-L-S-S-S-S-S-  
L-G-G-P-A-A-F-S-A-R-W-A-Q-E  
257 M17 3812.5 F-Q-P-H-P-G-L-Q-K-T-L-E-Q-F-H-L-S-S-T-S-S-  
L-G-G-P-A-A-F-S-A-R-W-A-Q-E  
258 M18 3897.6 F-Q-P-H-P-G-L-Q-K-T-L-E-Q-F-H-L-S-S-W-S-S-  
L-G-G-P-A-A-F-S-A-R-W-A-Q-E  
259 M19 3874.6 F-Q-P-H-P-G-L-Q-K-T-L-E-Q-F-H-L-S-S-Y-S-S-  
L-G-G-P-A-A-F-S-A-R-W-A-Q-E  
260 M20 3810.5 F-Q-P-H-P-G-L-Q-K-T-L-E-Q-F-H-L-S-S-V-S-S-  
L-G-G-P-A-A-F-S-A-R-W-A-Q-E  
261 N 1 3826.6 F-Q-P-H-P-G-L-Q-K-T-L-E-Q-F-H-L-S-S-M-A-S-  
L-G-G-P-A-A-F-S-A-R-W-A-Q-E  
262 N 2 3911.7 F-Q-P-H-P-G-L-Q-K-T-L-E-Q-F-H-L-S-S-M-R-S-  
L-G-G-P-A-A-F-S-A-R-W-A-Q-E  
263 N 3 3869.6 F-Q-P-H-P-G-L-Q-K-T-L-E-Q-F-H-L-S-S-M-N-S-  
L-G-G-P-A-A-F-S-A-R-W-A-Q-E  
264 N 4 3870.6 F-Q-P-H-P-G-L-Q-K-T-L-E-Q-F-H-L-S-S-M-D-S-  
L-G-G-P-A-A-F-S-A-R-W-A-Q-E  
265 N 5 3858.6 F-Q-P-H-P-G-L-Q-K-T-L-E-Q-F-H-L-S-S-M-C-S-  
L-G-G-P-A-A-F-S-A-R-W-A-Q-E  
266 N 6 3883.6 F-Q-P-H-P-G-L-Q-K-T-L-E-Q-F-H-L-S-S-M-Q-S-  
L-G-G-P-A-A-F-S-A-R-W-A-Q-E  
267 N 7 3884.6 F-Q-P-H-P-G-L-Q-K-T-L-E-Q-F-H-L-S-S-M-E-S-  
L-G-G-P-A-A-F-S-A-R-W-A-Q-E  
268 N 8 3812.6 F-Q-P-H-P-G-L-Q-K-T-L-E-Q-F-H-L-S-S-M-G-S-

L-G-G-P-A-A-F-S-A-R-W-A-Q-E  
269 N 9 3892.6 F-Q-P-H-P-G-L-Q-K-T-L-E-Q-F-H-L-S-S-M-H-S-  
L-G-G-P-A-A-F-S-A-R-W-A-Q-E  
270 N10 3868.7 F-Q-P-H-P-G-L-Q-K-T-L-E-Q-F-H-L-S-S-M-I-S-  
L-G-G-P-A-A-F-S-A-R-W-A-Q-E  
271 N11 3868.7 F-Q-P-H-P-G-L-Q-K-T-L-E-Q-F-H-L-S-S-M-L-S-  
L-G-G-P-A-A-F-S-A-R-W-A-Q-E  
272 N12 3883.7 F-Q-P-H-P-G-L-Q-K-T-L-E-Q-F-H-L-S-S-M-K-S-  
L-G-G-P-A-A-F-S-A-R-W-A-Q-E  
273 N13 3886.7 F-Q-P-H-P-G-L-Q-K-T-L-E-Q-F-H-L-S-S-M-M-S-  
L-G-G-P-A-A-F-S-A-R-W-A-Q-E  
274 N14 3902.7 F-Q-P-H-P-G-L-Q-K-T-L-E-Q-F-H-L-S-S-M-F-S-  
L-G-G-P-A-A-F-S-A-R-W-A-Q-E  
275 N15 3852.6 F-Q-P-H-P-G-L-Q-K-T-L-E-Q-F-H-L-S-S-M-P-S-  
L-G-G-P-A-A-F-S-A-R-W-A-Q-E  
276 N16 3842.6 F-Q-P-H-P-G-L-Q-K-T-L-E-Q-F-H-L-S-S-M-S-S-  
L-G-G-P-A-A-F-S-A-R-W-A-Q-E  
277 N17 3856.6 F-Q-P-H-P-G-L-Q-K-T-L-E-Q-F-H-L-S-S-M-T-S-  
L-G-G-P-A-A-F-S-A-R-W-A-Q-E  
278 N18 3941.7 F-Q-P-H-P-G-L-Q-K-T-L-E-Q-F-H-L-S-S-M-W-S-  
L-G-G-P-A-A-F-S-A-R-W-A-Q-E  
279 N19 3918.7 F-Q-P-H-P-G-L-Q-K-T-L-E-Q-F-H-L-S-S-M-Y-S-  
L-G-G-P-A-A-F-S-A-R-W-A-Q-E  
280 N20 3854.6 F-Q-P-H-P-G-L-Q-K-T-L-E-Q-F-H-L-S-S-M-V-S-  
L-G-G-P-A-A-F-S-A-R-W-A-Q-E  
281 0 1 3826.6 F-Q-P-H-P-G-L-Q-K-T-L-E-Q-F-H-L-S-S-M-S-A-  
L-G-G-P-A-A-F-S-A-R-W-A-Q-E  
282 0 2 3911.7 F-Q-P-H-P-G-L-Q-K-T-L-E-Q-F-H-L-S-S-M-S-R-  
L-G-G-P-A-A-F-S-A-R-W-A-Q-E  
283 0 3 3869.6 F-Q-P-H-P-G-L-Q-K-T-L-E-Q-F-H-L-S-S-M-S-N-  
L-G-G-P-A-A-F-S-A-R-W-A-Q-E  
284 0 4 3870.6 F-Q-P-H-P-G-L-Q-K-T-L-E-Q-F-H-L-S-S-M-S-D-  
L-G-G-P-A-A-F-S-A-R-W-A-Q-E  
285 0 5 3858.6 F-Q-P-H-P-G-L-Q-K-T-L-E-Q-F-H-L-S-S-M-S-C-  
L-G-G-P-A-A-F-S-A-R-W-A-Q-E  
286 0 6 3883.6 F-Q-P-H-P-G-L-Q-K-T-L-E-Q-F-H-L-S-S-M-S-Q-  
L-G-G-P-A-A-F-S-A-R-W-A-Q-E  
287 0 7 3884.6 F-Q-P-H-P-G-L-Q-K-T-L-E-Q-F-H-L-S-S-M-S-E-  
L-G-G-P-A-A-F-S-A-R-W-A-Q-E  
288 0 8 3812.6 F-Q-P-H-P-G-L-Q-K-T-L-E-Q-F-H-L-S-S-M-S-G-  
L-G-G-P-A-A-F-S-A-R-W-A-Q-E  
289 0 9 3892.6 F-Q-P-H-P-G-L-Q-K-T-L-E-Q-F-H-L-S-S-M-S-H-  
L-G-G-P-A-A-F-S-A-R-W-A-Q-E  
290 010 3868.7 F-Q-P-H-P-G-L-Q-K-T-L-E-Q-F-H-L-S-S-M-S-I-  
L-G-G-P-A-A-F-S-A-R-W-A-Q-E  
291 011 3868.7 F-Q-P-H-P-G-L-Q-K-T-L-E-Q-F-H-L-S-S-M-S-L-  
L-G-G-P-A-A-F-S-A-R-W-A-Q-E  
292 012 3883.7 F-Q-P-H-P-G-L-Q-K-T-L-E-Q-F-H-L-S-S-M-S-K-  
L-G-G-P-A-A-F-S-A-R-W-A-Q-E  
293 013 3886.7 F-Q-P-H-P-G-L-Q-K-T-L-E-Q-F-H-L-S-S-M-S-M-  
L-G-G-P-A-A-F-S-A-R-W-A-Q-E  
294 014 3902.7 F-Q-P-H-P-G-L-Q-K-T-L-E-Q-F-H-L-S-S-M-S-F-  
L-G-G-P-A-A-F-S-A-R-W-A-Q-E  
295 015 3852.6 F-Q-P-H-P-G-L-Q-K-T-L-E-Q-F-H-L-S-S-M-S-P-

L-G-G-P-A-A-F-S-A-R-W-A-Q-E  
296 016 3842.6 F-Q-P-H-P-G-L-Q-K-T-L-E-Q-F-H-L-S-S-M-S-S-  
L-G-G-P-A-A-F-S-A-R-W-A-Q-E  
297 017 3856.6 F-Q-P-H-P-G-L-Q-K-T-L-E-Q-F-H-L-S-S-M-S-T-  
L-G-G-P-A-A-F-S-A-R-W-A-Q-E  
298 018 3941.7 F-Q-P-H-P-G-L-Q-K-T-L-E-Q-F-H-L-S-S-M-S-W-  
L-G-G-P-A-A-F-S-A-R-W-A-Q-E  
299 019 3918.7 F-Q-P-H-P-G-L-Q-K-T-L-E-Q-F-H-L-S-S-M-S-Y-  
L-G-G-P-A-A-F-S-A-R-W-A-Q-E  
300 020 3854.6 F-Q-P-H-P-G-L-Q-K-T-L-E-Q-F-H-L-S-S-M-S-V-  
L-G-G-P-A-A-F-S-A-R-W-A-Q-E  
301 P 1 3800.5 F-Q-P-H-P-G-L-Q-K-T-L-E-Q-F-H-L-S-S-M-S-S-  
A-G-G-P-A-A-F-S-A-R-W-A-Q-E  
302 P 2 3885.6 F-Q-P-H-P-G-L-Q-K-T-L-E-Q-F-H-L-S-S-M-S-S-  
R-G-G-P-A-A-F-S-A-R-W-A-Q-E  
303 P 3 3843.5 F-Q-P-H-P-G-L-Q-K-T-L-E-Q-F-H-L-S-S-M-S-S-  
N-G-G-P-A-A-F-S-A-R-W-A-Q-E  
304 P 4 3844.5 F-Q-P-H-P-G-L-Q-K-T-L-E-Q-F-H-L-S-S-M-S-S-  
D-G-G-P-A-A-F-S-A-R-W-A-Q-E  
305 P 5 3832.5 F-Q-P-H-P-G-L-Q-K-T-L-E-Q-F-H-L-S-S-M-S-S-  
C-G-G-P-A-A-F-S-A-R-W-A-Q-E  
306 P 6 3857.5 F-Q-P-H-P-G-L-Q-K-T-L-E-Q-F-H-L-S-S-M-S-S-  
Q-G-G-P-A-A-F-S-A-R-W-A-Q-E  
307 P 7 3858.5 F-Q-P-H-P-G-L-Q-K-T-L-E-Q-F-H-L-S-S-M-S-S-  
E-G-G-P-A-A-F-S-A-R-W-A-Q-E  
308 P 8 3786.5 F-Q-P-H-P-G-L-Q-K-T-L-E-Q-F-H-L-S-S-M-S-S-  
G-G-G-P-A-A-F-S-A-R-W-A-Q-E  
309 P 9 3866.5 F-Q-P-H-P-G-L-Q-K-T-L-E-Q-F-H-L-S-S-M-S-S-  
H-G-G-P-A-A-F-S-A-R-W-A-Q-E  
310 P10 3842.6 F-Q-P-H-P-G-L-Q-K-T-L-E-Q-F-H-L-S-S-M-S-S-  
I-G-G-P-A-A-F-S-A-R-W-A-Q-E  
311 P11 3842.6 F-Q-P-H-P-G-L-Q-K-T-L-E-Q-F-H-L-S-S-M-S-S-  
L-G-G-P-A-A-F-S-A-R-W-A-Q-E  
312 P12 3857.6 F-Q-P-H-P-G-L-Q-K-T-L-E-Q-F-H-L-S-S-M-S-S-  
K-G-G-P-A-A-F-S-A-R-W-A-Q-E  
313 P13 3860.6 F-Q-P-H-P-G-L-Q-K-T-L-E-Q-F-H-L-S-S-M-S-S-  
M-G-G-P-A-A-F-S-A-R-W-A-Q-E  
314 P14 3876.6 F-Q-P-H-P-G-L-Q-K-T-L-E-Q-F-H-L-S-S-M-S-S-  
F-G-G-P-A-A-F-S-A-R-W-A-Q-E  
315 P15 3826.5 F-Q-P-H-P-G-L-Q-K-T-L-E-Q-F-H-L-S-S-M-S-S-  
P-G-G-P-A-A-F-S-A-R-W-A-Q-E  
316 P16 3816.5 F-Q-P-H-P-G-L-Q-K-T-L-E-Q-F-H-L-S-S-M-S-S-  
S-G-G-P-A-A-F-S-A-R-W-A-Q-E  
317 P17 3830.5 F-Q-P-H-P-G-L-Q-K-T-L-E-Q-F-H-L-S-S-M-S-S-  
T-G-G-P-A-A-F-S-A-R-W-A-Q-E  
318 P18 3915.6 F-Q-P-H-P-G-L-Q-K-T-L-E-Q-F-H-L-S-S-M-S-S-  
W-G-G-P-A-A-F-S-A-R-W-A-Q-E  
319 P19 3892.6 F-Q-P-H-P-G-L-Q-K-T-L-E-Q-F-H-L-S-S-M-S-S-  
Y-G-G-P-A-A-F-S-A-R-W-A-Q-E  
320 P20 3828.5 F-Q-P-H-P-G-L-Q-K-T-L-E-Q-F-H-L-S-S-M-S-S-  
V-G-G-P-A-A-F-S-A-R-W-A-Q-E  
321 Q 1 3856.6 F-Q-P-H-P-G-L-Q-K-T-L-E-Q-F-H-L-S-S-M-S-S-  
L-A-G-P-A-A-F-S-A-R-W-A-Q-E  
322 Q 2 3941.7 F-Q-P-H-P-G-L-Q-K-T-L-E-Q-F-H-L-S-S-M-S-S-

L-R-G-P-A-A-F-S-A-R-W-A-Q-E  
323 Q 3 3899.6 F-Q-P-H-P-G-L-Q-K-T-L-E-Q-F-H-L-S-S-M-S-S-  
L-N-G-P-A-A-F-S-A-R-W-A-Q-E  
324 Q 4 3900.6 F-Q-P-H-P-G-L-Q-K-T-L-E-Q-F-H-L-S-S-M-S-S-  
L-D-G-P-A-A-F-S-A-R-W-A-Q-E  
325 Q 5 3888.6 F-Q-P-H-P-G-L-Q-K-T-L-E-Q-F-H-L-S-S-M-S-S-  
L-C-G-P-A-A-F-S-A-R-W-A-Q-E  
326 Q 6 3913.6 F-Q-P-H-P-G-L-Q-K-T-L-E-Q-F-H-L-S-S-M-S-S-  
L-Q-G-P-A-A-F-S-A-R-W-A-Q-E  
327 Q 7 3914.6 F-Q-P-H-P-G-L-Q-K-T-L-E-Q-F-H-L-S-S-M-S-S-  
L-E-G-P-A-A-F-S-A-R-W-A-Q-E  
328 Q 8 3842.6 F-Q-P-H-P-G-L-Q-K-T-L-E-Q-F-H-L-S-S-M-S-S-  
L-G-G-P-A-A-F-S-A-R-W-A-Q-E  
329 Q 9 3922.6 F-Q-P-H-P-G-L-Q-K-T-L-E-Q-F-H-L-S-S-M-S-S-  
L-H-G-P-A-A-F-S-A-R-W-A-Q-E  
330 Q10 3898.7 F-Q-P-H-P-G-L-Q-K-T-L-E-Q-F-H-L-S-S-M-S-S-  
L-I-G-P-A-A-F-S-A-R-W-A-Q-E  
331 Q11 3898.7 F-Q-P-H-P-G-L-Q-K-T-L-E-Q-F-H-L-S-S-M-S-S-  
L-L-G-P-A-A-F-S-A-R-W-A-Q-E  
332 Q12 3913.7 F-Q-P-H-P-G-L-Q-K-T-L-E-Q-F-H-L-S-S-M-S-S-  
L-K-G-P-A-A-F-S-A-R-W-A-Q-E  
333 Q13 3916.7 F-Q-P-H-P-G-L-Q-K-T-L-E-Q-F-H-L-S-S-M-S-S-  
L-M-G-P-A-A-F-S-A-R-W-A-Q-E  
334 Q14 3932.7 F-Q-P-H-P-G-L-Q-K-T-L-E-Q-F-H-L-S-S-M-S-S-  
L-F-G-P-A-A-F-S-A-R-W-A-Q-E  
335 Q15 3882.6 F-Q-P-H-P-G-L-Q-K-T-L-E-Q-F-H-L-S-S-M-S-S-  
L-P-G-P-A-A-F-S-A-R-W-A-Q-E  
336 Q16 3872.6 F-Q-P-H-P-G-L-Q-K-T-L-E-Q-F-H-L-S-S-M-S-S-  
L-S-G-P-A-A-F-S-A-R-W-A-Q-E  
337 Q17 3886.6 F-Q-P-H-P-G-L-Q-K-T-L-E-Q-F-H-L-S-S-M-S-S-  
L-T-G-P-A-A-F-S-A-R-W-A-Q-E  
338 Q18 3971.7 F-Q-P-H-P-G-L-Q-K-T-L-E-Q-F-H-L-S-S-M-S-S-  
L-W-G-P-A-A-F-S-A-R-W-A-Q-E  
339 Q19 3948.7 F-Q-P-H-P-G-L-Q-K-T-L-E-Q-F-H-L-S-S-M-S-S-  
L-Y-G-P-A-A-F-S-A-R-W-A-Q-E  
340 Q20 3884.6 F-Q-P-H-P-G-L-Q-K-T-L-E-Q-F-H-L-S-S-M-S-S-  
L-V-G-P-A-A-F-S-A-R-W-A-Q-E  
341 R 1 3856.6 F-Q-P-H-P-G-L-Q-K-T-L-E-Q-F-H-L-S-S-M-S-S-  
L-G-A-P-A-A-F-S-A-R-W-A-Q-E  
342 R 2 3941.7 F-Q-P-H-P-G-L-Q-K-T-L-E-Q-F-H-L-S-S-M-S-S-  
L-G-R-P-A-A-F-S-A-R-W-A-Q-E  
343 R 3 3899.6 F-Q-P-H-P-G-L-Q-K-T-L-E-Q-F-H-L-S-S-M-S-S-  
L-G-N-P-A-A-F-S-A-R-W-A-Q-E  
344 R 4 3900.6 F-Q-P-H-P-G-L-Q-K-T-L-E-Q-F-H-L-S-S-M-S-S-  
L-G-D-P-A-A-F-S-A-R-W-A-Q-E  
345 R 5 3888.6 F-Q-P-H-P-G-L-Q-K-T-L-E-Q-F-H-L-S-S-M-S-S-  
L-G-C-P-A-A-F-S-A-R-W-A-Q-E  
346 R 6 3913.6 F-Q-P-H-P-G-L-Q-K-T-L-E-Q-F-H-L-S-S-M-S-S-  
L-G-Q-P-A-A-F-S-A-R-W-A-Q-E  
347 R 7 3914.6 F-Q-P-H-P-G-L-Q-K-T-L-E-Q-F-H-L-S-S-M-S-S-  
L-G-E-P-A-A-F-S-A-R-W-A-Q-E  
348 R 8 3842.6 F-Q-P-H-P-G-L-Q-K-T-L-E-Q-F-H-L-S-S-M-S-S-  
L-G-G-P-A-A-F-S-A-R-W-A-Q-E  
349 R 9 3922.6 F-Q-P-H-P-G-L-Q-K-T-L-E-Q-F-H-L-S-S-M-S-S-

L-G-H-P-A-A-F-S-A-R-W-A-Q-E  
 350 R10 3898.7 F-Q-P-H-P-G-L-Q-K-T-L-E-Q-F-H-L-S-S-M-S-S-  
 L-G-I-P-A-A-F-S-A-R-W-A-Q-E  
 351 R11 3898.7 F-Q-P-H-P-G-L-Q-K-T-L-E-Q-F-H-L-S-S-M-S-S-  
 L-G-L-P-A-A-F-S-A-R-W-A-Q-E  
 352 R12 3913.7 F-Q-P-H-P-G-L-Q-K-T-L-E-Q-F-H-L-S-S-M-S-S-  
 L-G-K-P-A-A-F-S-A-R-W-A-Q-E  
 353 R13 3916.7 F-Q-P-H-P-G-L-Q-K-T-L-E-Q-F-H-L-S-S-M-S-S-  
 L-G-M-P-A-A-F-S-A-R-W-A-Q-E  
 354 R14 3932.7 F-Q-P-H-P-G-L-Q-K-T-L-E-Q-F-H-L-S-S-M-S-S-  
 L-G-F-P-A-A-F-S-A-R-W-A-Q-E  
 355 R15 3882.6 F-Q-P-H-P-G-L-Q-K-T-L-E-Q-F-H-L-S-S-M-S-S-  
 L-G-P-P-A-A-F-S-A-R-W-A-Q-E  
 356 R16 3872.6 F-Q-P-H-P-G-L-Q-K-T-L-E-Q-F-H-L-S-S-M-S-S-  
 L-G-S-P-A-A-F-S-A-R-W-A-Q-E  
 357 R17 3886.6 F-Q-P-H-P-G-L-Q-K-T-L-E-Q-F-H-L-S-S-M-S-S-  
 L-G-T-P-A-A-F-S-A-R-W-A-Q-E  
 358 R18 3971.7 F-Q-P-H-P-G-L-Q-K-T-L-E-Q-F-H-L-S-S-M-S-S-  
 L-G-W-P-A-A-F-S-A-R-W-A-Q-E  
 359 R19 3948.7 F-Q-P-H-P-G-L-Q-K-T-L-E-Q-F-H-L-S-S-M-S-S-  
 L-G-Y-P-A-A-F-S-A-R-W-A-Q-E  
 360 R20 3884.6 F-Q-P-H-P-G-L-Q-K-T-L-E-Q-F-H-L-S-S-M-S-S-  
 L-G-V-P-A-A-F-S-A-R-W-A-Q-E  
 361 S 1 3816.6 F-Q-P-H-P-G-L-Q-K-T-L-E-Q-F-H-L-S-S-M-S-S-  
 L-G-G-A-A-A-F-S-A-R-W-A-Q-E  
 362 S 2 3901.7 F-Q-P-H-P-G-L-Q-K-T-L-E-Q-F-H-L-S-S-M-S-S-  
 L-G-G-R-A-A-F-S-A-R-W-A-Q-E  
 363 S 3 3859.6 F-Q-P-H-P-G-L-Q-K-T-L-E-Q-F-H-L-S-S-M-S-S-  
 L-G-G-N-A-A-F-S-A-R-W-A-Q-E  
 364 S 4 3860.6 F-Q-P-H-P-G-L-Q-K-T-L-E-Q-F-H-L-S-S-M-S-S-  
 L-G-G-D-A-A-F-S-A-R-W-A-Q-E  
 365 S 5 3848.6 F-Q-P-H-P-G-L-Q-K-T-L-E-Q-F-H-L-S-S-M-S-S-  
 L-G-G-C-A-A-F-S-A-R-W-A-Q-E  
 366 S 6 3873.6 F-Q-P-H-P-G-L-Q-K-T-L-E-Q-F-H-L-S-S-M-S-S-  
 L-G-G-Q-A-A-F-S-A-R-W-A-Q-E  
 367 S 7 3874.6 F-Q-P-H-P-G-L-Q-K-T-L-E-Q-F-H-L-S-S-M-S-S-  
 L-G-G-E-A-A-F-S-A-R-W-A-Q-E  
 368 S 8 3802.6 F-Q-P-H-P-G-L-Q-K-T-L-E-Q-F-H-L-S-S-M-S-S-  
 L-G-G-G-A-A-F-S-A-R-W-A-Q-E  
 369 S 9 3882.6 F-Q-P-H-P-G-L-Q-K-T-L-E-Q-F-H-L-S-S-M-S-S-  
 L-G-G-H-A-A-F-S-A-R-W-A-Q-E  
 370 S10 3858.7 F-Q-P-H-P-G-L-Q-K-T-L-E-Q-F-H-L-S-S-M-S-S-  
 L-G-G-I-A-A-F-S-A-R-W-A-Q-E  
 371 S11 3858.7 F-Q-P-H-P-G-L-Q-K-T-L-E-Q-F-H-L-S-S-M-S-S-  
 L-G-G-L-A-A-F-S-A-R-W-A-Q-E  
 372 S12 3873.7 F-Q-P-H-P-G-L-Q-K-T-L-E-Q-F-H-L-S-S-M-S-S-  
 L-G-G-K-A-A-F-S-A-R-W-A-Q-E  
 373 S13 3876.7 F-Q-P-H-P-G-L-Q-K-T-L-E-Q-F-H-L-S-S-M-S-S-  
 L-G-G-M-A-A-F-S-A-R-W-A-Q-E  
 374 S14 3892.7 F-Q-P-H-P-G-L-Q-K-T-L-E-Q-F-H-L-S-S-M-S-S-  
 L-G-G-F-A-A-F-S-A-R-W-A-Q-E  
 375 S15 3842.6 F-Q-P-H-P-G-L-Q-K-T-L-E-Q-F-H-L-S-S-M-S-S-  
 L-G-G-P-A-A-F-S-A-R-W-A-Q-E  
 376 S16 3832.6 F-Q-P-H-P-G-L-Q-K-T-L-E-Q-F-H-L-S-S-M-S-S-

|                             |     |        |                                            |
|-----------------------------|-----|--------|--------------------------------------------|
| L-G-G-S-A-A-F-S-A-R-W-A-Q-E |     |        |                                            |
| 377                         | S17 | 3846.6 | F-Q-P-H-P-G-L-Q-K-T-L-E-Q-F-H-L-S-S-M-S-S- |
| L-G-G-T-A-A-F-S-A-R-W-A-Q-E |     |        |                                            |
| 378                         | S18 | 3931.7 | F-Q-P-H-P-G-L-Q-K-T-L-E-Q-F-H-L-S-S-M-S-S- |
| L-G-G-W-A-A-F-S-A-R-W-A-Q-E |     |        |                                            |
| 379                         | S19 | 3908.7 | F-Q-P-H-P-G-L-Q-K-T-L-E-Q-F-H-L-S-S-M-S-S- |
| L-G-G-Y-A-A-F-S-A-R-W-A-Q-E |     |        |                                            |
| 380                         | S20 | 3844.6 | F-Q-P-H-P-G-L-Q-K-T-L-E-Q-F-H-L-S-S-M-S-S- |
| L-G-G-V-A-A-F-S-A-R-W-A-Q-E |     |        |                                            |
| 381                         | T 1 | 0      |                                            |
| 382                         | T 2 | 0      |                                            |
| 383                         | T 3 | 0      |                                            |
| 384                         | T 4 | 0      |                                            |
| 385                         | T 5 | 0      |                                            |
| 386                         | T 6 | 0      |                                            |
| 387                         | T 7 | 0      |                                            |
| 388                         | T 8 | 0      |                                            |
| 389                         | T 9 | 0      |                                            |
| 390                         | T10 | 0      |                                            |
| 391                         | T11 | 0      |                                            |
| 392                         | T12 | 0      |                                            |
| 393                         | T13 | 0      |                                            |
| 394                         | T14 | 0      |                                            |
| 395                         | T15 | 0      |                                            |
| 396                         | T16 | 0      |                                            |
| 397                         | T17 | 0      |                                            |
| 398                         | T18 | 0      |                                            |
| 399                         | T19 | 0      |                                            |
| 400                         | T20 | 0      |                                            |
| 401                         | U 1 | 0      |                                            |
| 402                         | U 2 | 0      |                                            |
| 403                         | U 3 | 0      |                                            |

|     |     |   |
|-----|-----|---|
| 404 | U 4 | 0 |
| 405 | U 5 | 0 |
| 406 | U 6 | 0 |
| 407 | U 7 | 0 |
| 408 | U 8 | 0 |
| 409 | U 9 | 0 |
| 410 | U10 | 0 |
| 411 | U11 | 0 |
| 412 | U12 | 0 |
| 413 | U13 | 0 |
| 414 | U14 | 0 |
| 415 | U15 | 0 |
| 416 | U16 | 0 |
| 417 | U17 | 0 |
| 418 | U18 | 0 |
| 419 | U19 | 0 |
| 420 | U20 | 0 |

|     |     |        |                                                                       |
|-----|-----|--------|-----------------------------------------------------------------------|
| 421 | V 1 | 3842.6 | F-Q-P-H-P-G-L-Q-K-T-L-E-Q-F-H-L-S-S-M-S-S-L-G-G-P-A-A-F-S-A-R-W-A-Q-E |
| 422 | V 2 | 3842.6 | F-Q-P-H-P-G-L-Q-K-T-L-E-Q-F-H-L-S-S-M-S-S-L-G-G-P-A-A-F-S-A-R-W-A-Q-E |
| 423 | V 3 | 3842.6 | F-Q-P-H-P-G-L-Q-K-T-L-E-Q-F-H-L-S-S-M-S-S-L-G-G-P-A-A-F-S-A-R-W-A-Q-E |
| 424 | V 4 | 3842.6 | F-Q-P-H-P-G-L-Q-K-T-L-E-Q-F-H-L-S-S-M-S-S-L-G-G-P-A-A-F-S-A-R-W-A-Q-E |
| 425 | V 5 | 3842.6 | F-Q-P-H-P-G-L-Q-K-T-L-E-Q-F-H-L-S-S-M-S-S-L-G-G-P-A-A-F-S-A-R-W-A-Q-E |

|     |     |   |
|-----|-----|---|
| 426 | V 6 | 0 |
| 427 | V 7 | 0 |

|     |     |        |                                                                       |
|-----|-----|--------|-----------------------------------------------------------------------|
| 428 | V 8 | 3842.6 | F-Q-P-H-P-G-L-Q-K-T-L-E-Q-F-H-L-S-S-M-S-S-L-G-G-P-A-A-F-S-A-R-W-A-Q-E |
| 429 | V 9 | 3842.6 | F-Q-P-H-P-G-L-Q-K-T-L-E-Q-F-H-L-S-S-M-S-S-L-G-G-P-A-A-F-S-A-R-W-A-Q-E |
| 430 | V10 | 3842.6 | F-Q-P-H-P-G-L-Q-K-T-L-E-Q-F-H-L-S-S-M-S-S-                            |

L-G-G-P-A-A-F-S-A-R-W-A-Q-E  
 431 V11 3842.6 F-Q-P-H-P-G-L-Q-K-T-L-E-Q-F-H-L-S-S-M-S-S-  
 L-G-G-P-A-A-F-S-A-R-W-A-Q-E  
 432 V12 3842.6 F-Q-P-H-P-G-L-Q-K-T-L-E-Q-F-H-L-S-S-M-S-S-  
 L-G-G-P-A-A-F-S-A-R-W-A-Q-E  
 433 V13 0  
  
 434 V14 0  
  
 435 V15 3842.6 F-Q-P-H-P-G-L-Q-K-T-L-E-Q-F-H-L-S-S-M-S-S-  
 L-G-G-P-A-A-F-S-A-R-W-A-Q-E  
 436 V16 3842.6 F-Q-P-H-P-G-L-Q-K-T-L-E-Q-F-H-L-S-S-M-S-S-  
 L-G-G-P-A-A-F-S-A-R-W-A-Q-E  
 437 V17 3842.6 F-Q-P-H-P-G-L-Q-K-T-L-E-Q-F-H-L-S-S-M-S-S-  
 L-G-G-P-A-A-F-S-A-R-W-A-Q-E  
 438 V18 3842.6 F-Q-P-H-P-G-L-Q-K-T-L-E-Q-F-H-L-S-S-M-S-S-  
 L-G-G-P-A-A-F-S-A-R-W-A-Q-E  
 439 V19 3842.6 F-Q-P-H-P-G-L-Q-K-T-L-E-Q-F-H-L-S-S-M-S-S-  
 L-G-G-P-A-A-F-S-A-R-W-A-Q-E  
 440 V20 0  
  
 441 W 1 3842.6 F-Q-P-H-P-G-L-Q-K-T-L-E-Q-F-H-L-S-S-M-S-S-  
 L-G-G-P-A-A-F-S-A-R-W-A-Q-E  
 442 W 2 3842.6 F-Q-P-H-P-G-L-Q-K-T-L-E-Q-F-H-L-S-S-M-S-S-  
 L-G-G-P-A-A-F-S-A-R-W-A-Q-E  
 443 W 3 3842.6 F-Q-P-H-P-G-L-Q-K-T-L-E-Q-F-H-L-S-S-M-S-S-  
 L-G-G-P-A-A-F-S-A-R-W-A-Q-E  
 444 W 4 3842.6 F-Q-P-H-P-G-L-Q-K-T-L-E-Q-F-H-L-S-S-M-S-S-  
 L-G-G-P-A-A-F-S-A-R-W-A-Q-E  
 445 W 5 3842.6 F-Q-P-H-P-G-L-Q-K-T-L-E-Q-F-H-L-S-S-M-S-S-  
 L-G-G-P-A-A-F-S-A-R-W-A-Q-E  
 446 W 6 0  
  
 447 W 7 0  
  
 448 W 8 3842.6 F-Q-P-H-P-G-L-Q-K-T-L-E-Q-F-H-L-S-S-M-S-S-  
 L-G-G-P-A-A-F-S-A-R-W-A-Q-E  
 449 W 9 3842.6 F-Q-P-H-P-G-L-Q-K-T-L-E-Q-F-H-L-S-S-M-S-S-  
 L-G-G-P-A-A-F-S-A-R-W-A-Q-E  
 450 W10 3842.6 F-Q-P-H-P-G-L-Q-K-T-L-E-Q-F-H-L-S-S-M-S-S-  
 L-G-G-P-A-A-F-S-A-R-W-A-Q-E  
 451 W11 3842.6 F-Q-P-H-P-G-L-Q-K-T-L-E-Q-F-H-L-S-S-M-S-S-  
 L-G-G-P-A-A-F-S-A-R-W-A-Q-E  
 452 W12 3842.6 F-Q-P-H-P-G-L-Q-K-T-L-E-Q-F-H-L-S-S-M-S-S-  
 L-G-G-P-A-A-F-S-A-R-W-A-Q-E  
 453 W13 0  
  
 454 W14 0  
  
 455 W15 3842.6 F-Q-P-H-P-G-L-Q-K-T-L-E-Q-F-H-L-S-S-M-S-S-  
 L-G-G-P-A-A-F-S-A-R-W-A-Q-E  
 456 W16 3842.6 F-Q-P-H-P-G-L-Q-K-T-L-E-Q-F-H-L-S-S-M-S-S-  
 L-G-G-P-A-A-F-S-A-R-W-A-Q-E  
 457 W17 3842.6 F-Q-P-H-P-G-L-Q-K-T-L-E-Q-F-H-L-S-S-M-S-S-

L-G-G-P-A-A-F-S-A-R-W-A-Q-E  
 458 W18 3842.6 F-Q-P-H-P-G-L-Q-K-T-L-E-Q-F-H-L-S-S-M-S-S-  
 L-G-G-P-A-A-F-S-A-R-W-A-Q-E  
 459 W19 3842.6 F-Q-P-H-P-G-L-Q-K-T-L-E-Q-F-H-L-S-S-M-S-S-  
 L-G-G-P-A-A-F-S-A-R-W-A-Q-E  
 460 W20 0  
  
 461 X 1 3842.6 F-Q-P-H-P-G-L-Q-K-T-L-E-Q-F-H-L-S-S-M-S-S-  
 L-G-G-P-A-A-F-S-A-R-W-A-Q-E  
 462 X 2 3842.6 F-Q-P-H-P-G-L-Q-K-T-L-E-Q-F-H-L-S-S-M-S-S-  
 L-G-G-P-A-A-F-S-A-R-W-A-Q-E  
 463 X 3 3842.6 F-Q-P-H-P-G-L-Q-K-T-L-E-Q-F-H-L-S-S-M-S-S-  
 L-G-G-P-A-A-F-S-A-R-W-A-Q-E  
 464 X 4 3842.6 F-Q-P-H-P-G-L-Q-K-T-L-E-Q-F-H-L-S-S-M-S-S-  
 L-G-G-P-A-A-F-S-A-R-W-A-Q-E  
 465 X 5 3842.6 F-Q-P-H-P-G-L-Q-K-T-L-E-Q-F-H-L-S-S-M-S-S-  
 L-G-G-P-A-A-F-S-A-R-W-A-Q-E  
 466 X 6 0  
  
 467 X 7 0  
  
 468 X 8 3842.6 F-Q-P-H-P-G-L-Q-K-T-L-E-Q-F-H-L-S-S-M-S-S-  
 L-G-G-P-A-A-F-S-A-R-W-A-Q-E  
 469 X 9 3842.6 F-Q-P-H-P-G-L-Q-K-T-L-E-Q-F-H-L-S-S-M-S-S-  
 L-G-G-P-A-A-F-S-A-R-W-A-Q-E  
 470 X10 3842.6 F-Q-P-H-P-G-L-Q-K-T-L-E-Q-F-H-L-S-S-M-S-S-  
 L-G-G-P-A-A-F-S-A-R-W-A-Q-E  
 471 X11 3842.6 F-Q-P-H-P-G-L-Q-K-T-L-E-Q-F-H-L-S-S-M-S-S-  
 L-G-G-P-A-A-F-S-A-R-W-A-Q-E  
 472 X12 3842.6 F-Q-P-H-P-G-L-Q-K-T-L-E-Q-F-H-L-S-S-M-S-S-  
 L-G-G-P-A-A-F-S-A-R-W-A-Q-E  
 473 X13 0  
  
 474 X14 0  
  
 475 X15 3842.6 F-Q-P-H-P-G-L-Q-K-T-L-E-Q-F-H-L-S-S-M-S-S-  
 L-G-G-P-A-A-F-S-A-R-W-A-Q-E  
 476 X16 3842.6 F-Q-P-H-P-G-L-Q-K-T-L-E-Q-F-H-L-S-S-M-S-S-  
 L-G-G-P-A-A-F-S-A-R-W-A-Q-E  
 477 X17 3842.6 F-Q-P-H-P-G-L-Q-K-T-L-E-Q-F-H-L-S-S-M-S-S-  
 L-G-G-P-A-A-F-S-A-R-W-A-Q-E  
 478 X18 3842.6 F-Q-P-H-P-G-L-Q-K-T-L-E-Q-F-H-L-S-S-M-S-S-  
 L-G-G-P-A-A-F-S-A-R-W-A-Q-E  
 479 X19 3842.6 F-Q-P-H-P-G-L-Q-K-T-L-E-Q-F-H-L-S-S-M-S-S-  
 L-G-G-P-A-A-F-S-A-R-W-A-Q-E  
 480 X20 0  
  
 481 Y 1 3842.6 F-Q-P-H-P-G-L-Q-K-T-L-E-Q-F-H-L-S-S-M-S-S-  
 L-G-G-P-A-A-F-S-A-R-W-A-Q-E  
 482 Y 2 3842.6 F-Q-P-H-P-G-L-Q-K-T-L-E-Q-F-H-L-S-S-M-S-S-  
 L-G-G-P-A-A-F-S-A-R-W-A-Q-E  
 483 Y 3 3842.6 F-Q-P-H-P-G-L-Q-K-T-L-E-Q-F-H-L-S-S-M-S-S-  
 L-G-G-P-A-A-F-S-A-R-W-A-Q-E  
 484 Y 4 3842.6 F-Q-P-H-P-G-L-Q-K-T-L-E-Q-F-H-L-S-S-M-S-S-

L-G-G-P-A-A-F-S-A-R-W-A-Q-E  
 485 Y 5 3842.6 F-Q-P-H-P-G-L-Q-K-T-L-E-Q-F-H-L-S-S-M-S-S-  
 L-G-G-P-A-A-F-S-A-R-W-A-Q-E  
 486 Y 6 0  
  
 487 Y 7 0  
  
 488 Y 8 3842.6 F-Q-P-H-P-G-L-Q-K-T-L-E-Q-F-H-L-S-S-M-S-S-  
 L-G-G-P-A-A-F-S-A-R-W-A-Q-E  
 489 Y 9 3842.6 F-Q-P-H-P-G-L-Q-K-T-L-E-Q-F-H-L-S-S-M-S-S-  
 L-G-G-P-A-A-F-S-A-R-W-A-Q-E  
 490 Y10 3842.6 F-Q-P-H-P-G-L-Q-K-T-L-E-Q-F-H-L-S-S-M-S-S-  
 L-G-G-P-A-A-F-S-A-R-W-A-Q-E  
 491 Y11 3842.6 F-Q-P-H-P-G-L-Q-K-T-L-E-Q-F-H-L-S-S-M-S-S-  
 L-G-G-P-A-A-F-S-A-R-W-A-Q-E  
 492 Y12 3842.6 F-Q-P-H-P-G-L-Q-K-T-L-E-Q-F-H-L-S-S-M-S-S-  
 L-G-G-P-A-A-F-S-A-R-W-A-Q-E  
 493 Y13 0  
  
 494 Y14 0  
  
 495 Y15 3842.6 F-Q-P-H-P-G-L-Q-K-T-L-E-Q-F-H-L-S-S-M-S-S-  
 L-G-G-P-A-A-F-S-A-R-W-A-Q-E  
 496 Y16 3842.6 F-Q-P-H-P-G-L-Q-K-T-L-E-Q-F-H-L-S-S-M-S-S-  
 L-G-G-P-A-A-F-S-A-R-W-A-Q-E  
 497 Y17 3842.6 F-Q-P-H-P-G-L-Q-K-T-L-E-Q-F-H-L-S-S-M-S-S-  
 L-G-G-P-A-A-F-S-A-R-W-A-Q-E  
 498 Y18 3842.6 F-Q-P-H-P-G-L-Q-K-T-L-E-Q-F-H-L-S-S-M-S-S-  
 L-G-G-P-A-A-F-S-A-R-W-A-Q-E  
 499 Y19 3842.6 F-Q-P-H-P-G-L-Q-K-T-L-E-Q-F-H-L-S-S-M-S-S-  
 L-G-G-P-A-A-F-S-A-R-W-A-Q-E  
 500 Y20 0  
  
 501 Z 1 0  
  
 502 Z 2 0  
  
 503 Z 3 0  
  
 504 Z 4 0  
  
 505 Z 5 0  
  
 506 Z 6 0  
  
 507 Z 7 0  
  
 508 Z 8 0  
  
 509 Z 9 0  
  
 510 Z10 0  
  
 511 Z11 0

512        Z12        0

513        Z13        0

514        Z14        0

515        Z15        0

516        Z16        0

517        Z17        0

518        Z18        0

519        Z19        0

520        Z20        0

521        [ 1        3516.3  
F-S-A-R-W-A-Q-E-A-Y-K-K-E-S

T-L-E-Q-F-H-L-S-S-M-S-S-L-G-G-P-A-A-

522        [ 2        3516.3  
F-S-A-R-W-A-Q-E-A-Y-K-K-E-S

T-L-E-Q-F-H-L-S-S-M-S-S-L-G-G-P-A-A-

523        [ 3        3516.3  
F-S-A-R-W-A-Q-E-A-Y-K-K-E-S

T-L-E-Q-F-H-L-S-S-M-S-S-L-G-G-P-A-A-

524        [ 4        3516.3  
F-S-A-R-W-A-Q-E-A-Y-K-K-E-S

T-L-E-Q-F-H-L-S-S-M-S-S-L-G-G-P-A-A-

525        [ 5        3516.3  
F-S-A-R-W-A-Q-E-A-Y-K-K-E-S

T-L-E-Q-F-H-L-S-S-M-S-S-L-G-G-P-A-A-

526        [ 6        0

527        [ 7        0

528        [ 8        3516.3  
F-S-A-R-W-A-Q-E-A-Y-K-K-E-S

T-L-E-Q-F-H-L-S-S-M-S-S-L-G-G-P-A-A-

529        [ 9        3516.3  
F-S-A-R-W-A-Q-E-A-Y-K-K-E-S

T-L-E-Q-F-H-L-S-S-M-S-S-L-G-G-P-A-A-

530        [10        3516.3  
F-S-A-R-W-A-Q-E-A-Y-K-K-E-S

T-L-E-Q-F-H-L-S-S-M-S-S-L-G-G-P-A-A-

531        [11        3516.3  
F-S-A-R-W-A-Q-E-A-Y-K-K-E-S

T-L-E-Q-F-H-L-S-S-M-S-S-L-G-G-P-A-A-

532        [12        3516.3  
F-S-A-R-W-A-Q-E-A-Y-K-K-E-S

T-L-E-Q-F-H-L-S-S-M-S-S-L-G-G-P-A-A-

533        [13        0

534        [14        0

535        [15        3516.3  
F-S-A-R-W-A-Q-E-A-Y-K-K-E-S

T-L-E-Q-F-H-L-S-S-M-S-S-L-G-G-P-A-A-

536        [16        3516.3  
F-S-A-R-W-A-Q-E-A-Y-K-K-E-S

T-L-E-Q-F-H-L-S-S-M-S-S-L-G-G-P-A-A-

537        [17        3516.3  
F-S-A-R-W-A-Q-E-A-Y-K-K-E-S

T-L-E-Q-F-H-L-S-S-M-S-S-L-G-G-P-A-A-

538        [18        3516.3

T-L-E-Q-F-H-L-S-S-M-S-S-L-G-G-P-A-A-

F-S-A-R-W-A-Q-E-A-Y-K-K-E-S  
539 [19 3516.3  
F-S-A-R-W-A-Q-E-A-Y-K-K-E-S  
540 [20 0

541 \ 1 3516.3  
F-S-A-R-W-A-Q-E-A-Y-K-K-E-S  
542 \ 2 3516.3  
F-S-A-R-W-A-Q-E-A-Y-K-K-E-S  
543 \ 3 3516.3  
F-S-A-R-W-A-Q-E-A-Y-K-K-E-S  
544 \ 4 3516.3  
F-S-A-R-W-A-Q-E-A-Y-K-K-E-S  
545 \ 5 3516.3  
F-S-A-R-W-A-Q-E-A-Y-K-K-E-S  
546 \ 6 0

547 \ 7 0

548 \ 8 3516.3  
F-S-A-R-W-A-Q-E-A-Y-K-K-E-S  
549 \ 9 3516.3  
F-S-A-R-W-A-Q-E-A-Y-K-K-E-S  
550 \10 3516.3  
F-S-A-R-W-A-Q-E-A-Y-K-K-E-S  
551 \11 3516.3  
F-S-A-R-W-A-Q-E-A-Y-K-K-E-S  
552 \12 3516.3  
F-S-A-R-W-A-Q-E-A-Y-K-K-E-S  
553 \13 0

554 \14 0

555 \15 3516.3  
F-S-A-R-W-A-Q-E-A-Y-K-K-E-S  
556 \16 3516.3  
F-S-A-R-W-A-Q-E-A-Y-K-K-E-S  
557 \17 3516.3  
F-S-A-R-W-A-Q-E-A-Y-K-K-E-S  
558 \18 3516.3  
F-S-A-R-W-A-Q-E-A-Y-K-K-E-S  
559 \19 3516.3  
F-S-A-R-W-A-Q-E-A-Y-K-K-E-S  
560 \20 0

561 ] 1 3516.3  
F-S-A-R-W-A-Q-E-A-Y-K-K-E-S  
562 ] 2 3516.3  
F-S-A-R-W-A-Q-E-A-Y-K-K-E-S  
563 ] 3 3516.3  
F-S-A-R-W-A-Q-E-A-Y-K-K-E-S  
564 ] 4 3516.3  
F-S-A-R-W-A-Q-E-A-Y-K-K-E-S  
565 ] 5 3516.3

T-L-E-Q-F-H-L-S-S-M-S-S-L-G-G-P-A-A-

F-S-A-R-W-A-Q-E-A-Y-K-K-E-S  
566 ] 6 0

567 ] 7 0

568 ] 8 3516.3  
F-S-A-R-W-A-Q-E-A-Y-K-K-E-S  
569 ] 9 3516.3  
F-S-A-R-W-A-Q-E-A-Y-K-K-E-S  
570 ] 10 3516.3  
F-S-A-R-W-A-Q-E-A-Y-K-K-E-S  
571 ] 11 3516.3  
F-S-A-R-W-A-Q-E-A-Y-K-K-E-S  
572 ] 12 3516.3  
F-S-A-R-W-A-Q-E-A-Y-K-K-E-S  
573 ] 13 0

574 ] 14 0

575 ] 15 3516.3  
F-S-A-R-W-A-Q-E-A-Y-K-K-E-S  
576 ] 16 3516.3  
F-S-A-R-W-A-Q-E-A-Y-K-K-E-S  
577 ] 17 3516.3  
F-S-A-R-W-A-Q-E-A-Y-K-K-E-S  
578 ] 18 3516.3  
F-S-A-R-W-A-Q-E-A-Y-K-K-E-S  
579 ] 19 3516.3  
F-S-A-R-W-A-Q-E-A-Y-K-K-E-S  
580 ] 20 0

581 ^ 1 3516.3  
F-S-A-R-W-A-Q-E-A-Y-K-K-E-S  
582 ^ 2 3516.3  
F-S-A-R-W-A-Q-E-A-Y-K-K-E-S  
583 ^ 3 3516.3  
F-S-A-R-W-A-Q-E-A-Y-K-K-E-S  
584 ^ 4 3516.3  
F-S-A-R-W-A-Q-E-A-Y-K-K-E-S  
585 ^ 5 3516.3  
F-S-A-R-W-A-Q-E-A-Y-K-K-E-S  
586 ^ 6 0

587 ^ 7 0

588 ^ 8 3516.3  
F-S-A-R-W-A-Q-E-A-Y-K-K-E-S  
589 ^ 9 3516.3  
F-S-A-R-W-A-Q-E-A-Y-K-K-E-S  
590 ^ 10 3516.3  
F-S-A-R-W-A-Q-E-A-Y-K-K-E-S  
591 ^ 11 3516.3  
F-S-A-R-W-A-Q-E-A-Y-K-K-E-S  
592 ^ 12 3516.3

T-L-E-Q-F-H-L-S-S-M-S-S-L-G-G-P-A-A-

F-S-A-R-W-A-Q-E-A-Y-K-K-E-S  
593        ^13        0

594        ^14        0

595        ^15        3516.3        T-L-E-Q-F-H-L-S-S-M-S-S-L-G-G-P-A-A-  
F-S-A-R-W-A-Q-E-A-Y-K-K-E-S  
596        ^16        3516.3        T-L-E-Q-F-H-L-S-S-M-S-S-L-G-G-P-A-A-  
F-S-A-R-W-A-Q-E-A-Y-K-K-E-S  
597        ^17        3516.3        T-L-E-Q-F-H-L-S-S-M-S-S-L-G-G-P-A-A-  
F-S-A-R-W-A-Q-E-A-Y-K-K-E-S  
598        ^18        3516.3        T-L-E-Q-F-H-L-S-S-M-S-S-L-G-G-P-A-A-  
F-S-A-R-W-A-Q-E-A-Y-K-K-E-S  
599        ^19        3516.3        T-L-E-Q-F-H-L-S-S-M-S-S-L-G-G-P-A-A-  
F-S-A-R-W-A-Q-E-A-Y-K-K-E-S  
600        ^20        0

601        A 1        3800.5        F-Q-P-H-P-G-A-Q-K-T-L-E-Q-F-H-L-S-S-M-S-S-  
L-G-G-P-A-A-F-S-A-R-W-A-Q-E  
602        A 2        3885.6        F-Q-P-H-P-G-R-Q-K-T-L-E-Q-F-H-L-S-S-M-S-S-  
L-G-G-P-A-A-F-S-A-R-W-A-Q-E  
603        A 3        3843.5        F-Q-P-H-P-G-N-Q-K-T-L-E-Q-F-H-L-S-S-M-S-S-  
L-G-G-P-A-A-F-S-A-R-W-A-Q-E  
604        A 4        3844.5        F-Q-P-H-P-G-D-Q-K-T-L-E-Q-F-H-L-S-S-M-S-S-  
L-G-G-P-A-A-F-S-A-R-W-A-Q-E  
605        A 5        3832.5        F-Q-P-H-P-G-C-Q-K-T-L-E-Q-F-H-L-S-S-M-S-S-  
L-G-G-P-A-A-F-S-A-R-W-A-Q-E  
606        A 6        3857.5        F-Q-P-H-P-G-Q-Q-K-T-L-E-Q-F-H-L-S-S-M-S-S-  
L-G-G-P-A-A-F-S-A-R-W-A-Q-E  
607        A 7        3858.5        F-Q-P-H-P-G-E-Q-K-T-L-E-Q-F-H-L-S-S-M-S-S-  
L-G-G-P-A-A-F-S-A-R-W-A-Q-E  
608        A 8        3786.5        F-Q-P-H-P-G-G-Q-K-T-L-E-Q-F-H-L-S-S-M-S-S-  
L-G-G-P-A-A-F-S-A-R-W-A-Q-E  
609        A 9        3866.5        F-Q-P-H-P-G-H-Q-K-T-L-E-Q-F-H-L-S-S-M-S-S-  
L-G-G-P-A-A-F-S-A-R-W-A-Q-E  
610        A10        3842.6        F-Q-P-H-P-G-I-Q-K-T-L-E-Q-F-H-L-S-S-M-S-S-  
L-G-G-P-A-A-F-S-A-R-W-A-Q-E  
611        A11        3842.6        F-Q-P-H-P-G-L-Q-K-T-L-E-Q-F-H-L-S-S-M-S-S-  
L-G-G-P-A-A-F-S-A-R-W-A-Q-E  
612        A12        3857.6        F-Q-P-H-P-G-K-Q-K-T-L-E-Q-F-H-L-S-S-M-S-S-  
L-G-G-P-A-A-F-S-A-R-W-A-Q-E  
613        A13        3860.6        F-Q-P-H-P-G-M-Q-K-T-L-E-Q-F-H-L-S-S-M-S-S-  
L-G-G-P-A-A-F-S-A-R-W-A-Q-E  
614        A14        3876.6        F-Q-P-H-P-G-F-Q-K-T-L-E-Q-F-H-L-S-S-M-S-S-  
L-G-G-P-A-A-F-S-A-R-W-A-Q-E  
615        A15        3826.5        F-Q-P-H-P-G-P-Q-K-T-L-E-Q-F-H-L-S-S-M-S-S-  
L-G-G-P-A-A-F-S-A-R-W-A-Q-E  
616        A16        3816.5        F-Q-P-H-P-G-S-Q-K-T-L-E-Q-F-H-L-S-S-M-S-S-  
L-G-G-P-A-A-F-S-A-R-W-A-Q-E  
617        A17        3830.5        F-Q-P-H-P-G-T-Q-K-T-L-E-Q-F-H-L-S-S-M-S-S-  
L-G-G-P-A-A-F-S-A-R-W-A-Q-E  
618        A18        3915.6        F-Q-P-H-P-G-W-Q-K-T-L-E-Q-F-H-L-S-S-M-S-S-  
L-G-G-P-A-A-F-S-A-R-W-A-Q-E  
619        A19        3892.6        F-Q-P-H-P-G-Y-Q-K-T-L-E-Q-F-H-L-S-S-M-S-S-

L-G-G-P-A-A-F-S-A-R-W-A-Q-E  
620 A20 3828.5 F-Q-P-H-P-G-V-Q-K-T-L-E-Q-F-H-L-S-S-M-S-S-  
L-G-G-P-A-A-F-S-A-R-W-A-Q-E  
621 B 1 3785.6 F-Q-P-H-P-G-L-A-K-T-L-E-Q-F-H-L-S-S-M-S-S-  
L-G-G-P-A-A-F-S-A-R-W-A-Q-E  
622 B 2 3870.7 F-Q-P-H-P-G-L-R-K-T-L-E-Q-F-H-L-S-S-M-S-S-  
L-G-G-P-A-A-F-S-A-R-W-A-Q-E  
623 B 3 3828.6 F-Q-P-H-P-G-L-N-K-T-L-E-Q-F-H-L-S-S-M-S-S-  
L-G-G-P-A-A-F-S-A-R-W-A-Q-E  
624 B 4 3829.6 F-Q-P-H-P-G-L-D-K-T-L-E-Q-F-H-L-S-S-M-S-S-  
L-G-G-P-A-A-F-S-A-R-W-A-Q-E  
625 B 5 3817.6 F-Q-P-H-P-G-L-C-K-T-L-E-Q-F-H-L-S-S-M-S-S-  
L-G-G-P-A-A-F-S-A-R-W-A-Q-E  
626 B 6 3842.6 F-Q-P-H-P-G-L-Q-K-T-L-E-Q-F-H-L-S-S-M-S-S-  
L-G-G-P-A-A-F-S-A-R-W-A-Q-E  
627 B 7 3843.6 F-Q-P-H-P-G-L-E-K-T-L-E-Q-F-H-L-S-S-M-S-S-  
L-G-G-P-A-A-F-S-A-R-W-A-Q-E  
628 B 8 3771.6 F-Q-P-H-P-G-L-G-K-T-L-E-Q-F-H-L-S-S-M-S-S-  
L-G-G-P-A-A-F-S-A-R-W-A-Q-E  
629 B 9 3851.6 F-Q-P-H-P-G-L-H-K-T-L-E-Q-F-H-L-S-S-M-S-S-  
L-G-G-P-A-A-F-S-A-R-W-A-Q-E  
630 B10 3827.7 F-Q-P-H-P-G-L-I-K-T-L-E-Q-F-H-L-S-S-M-S-S-  
L-G-G-P-A-A-F-S-A-R-W-A-Q-E  
631 B11 3827.7 F-Q-P-H-P-G-L-L-K-T-L-E-Q-F-H-L-S-S-M-S-S-  
L-G-G-P-A-A-F-S-A-R-W-A-Q-E  
632 B12 3842.7 F-Q-P-H-P-G-L-K-K-T-L-E-Q-F-H-L-S-S-M-S-S-  
L-G-G-P-A-A-F-S-A-R-W-A-Q-E  
633 B13 3845.7 F-Q-P-H-P-G-L-M-K-T-L-E-Q-F-H-L-S-S-M-S-S-  
L-G-G-P-A-A-F-S-A-R-W-A-Q-E  
634 B14 3861.7 F-Q-P-H-P-G-L-F-K-T-L-E-Q-F-H-L-S-S-M-S-S-  
L-G-G-P-A-A-F-S-A-R-W-A-Q-E  
635 B15 3811.6 F-Q-P-H-P-G-L-P-K-T-L-E-Q-F-H-L-S-S-M-S-S-  
L-G-G-P-A-A-F-S-A-R-W-A-Q-E  
636 B16 3801.6 F-Q-P-H-P-G-L-S-K-T-L-E-Q-F-H-L-S-S-M-S-S-  
L-G-G-P-A-A-F-S-A-R-W-A-Q-E  
637 B17 3815.6 F-Q-P-H-P-G-L-T-K-T-L-E-Q-F-H-L-S-S-M-S-S-  
L-G-G-P-A-A-F-S-A-R-W-A-Q-E  
638 B18 3900.7 F-Q-P-H-P-G-L-W-K-T-L-E-Q-F-H-L-S-S-M-S-S-  
L-G-G-P-A-A-F-S-A-R-W-A-Q-E  
639 B19 3877.7 F-Q-P-H-P-G-L-Y-K-T-L-E-Q-F-H-L-S-S-M-S-S-  
L-G-G-P-A-A-F-S-A-R-W-A-Q-E  
640 B20 3813.6 F-Q-P-H-P-G-L-V-K-T-L-E-Q-F-H-L-S-S-M-S-S-  
L-G-G-P-A-A-F-S-A-R-W-A-Q-E  
641 C 1 3785.5 F-Q-P-H-P-G-L-Q-A-T-L-E-Q-F-H-L-S-S-M-S-S-  
L-G-G-P-A-A-F-S-A-R-W-A-Q-E  
642 C 2 3870.6 F-Q-P-H-P-G-L-Q-R-T-L-E-Q-F-H-L-S-S-M-S-S-  
L-G-G-P-A-A-F-S-A-R-W-A-Q-E  
643 C 3 3828.5 F-Q-P-H-P-G-L-Q-N-T-L-E-Q-F-H-L-S-S-M-S-S-  
L-G-G-P-A-A-F-S-A-R-W-A-Q-E  
644 C 4 3829.5 F-Q-P-H-P-G-L-Q-D-T-L-E-Q-F-H-L-S-S-M-S-S-  
L-G-G-P-A-A-F-S-A-R-W-A-Q-E  
645 C 5 3817.5 F-Q-P-H-P-G-L-Q-C-T-L-E-Q-F-H-L-S-S-M-S-S-  
L-G-G-P-A-A-F-S-A-R-W-A-Q-E  
646 C 6 3842.5 F-Q-P-H-P-G-L-Q-Q-T-L-E-Q-F-H-L-S-S-M-S-S-

L-G-G-P-A-A-F-S-A-R-W-A-Q-E  
647 C 7 3843.5 F-Q-P-H-P-G-L-Q-E-T-L-E-Q-F-H-L-S-S-M-S-S-  
L-G-G-P-A-A-F-S-A-R-W-A-Q-E  
648 C 8 3771.5 F-Q-P-H-P-G-L-Q-G-T-L-E-Q-F-H-L-S-S-M-S-S-  
L-G-G-P-A-A-F-S-A-R-W-A-Q-E  
649 C 9 3851.5 F-Q-P-H-P-G-L-Q-H-T-L-E-Q-F-H-L-S-S-M-S-S-  
L-G-G-P-A-A-F-S-A-R-W-A-Q-E  
650 C10 3827.6 F-Q-P-H-P-G-L-Q-I-T-L-E-Q-F-H-L-S-S-M-S-S-  
L-G-G-P-A-A-F-S-A-R-W-A-Q-E  
651 C11 3827.6 F-Q-P-H-P-G-L-Q-L-T-L-E-Q-F-H-L-S-S-M-S-S-  
L-G-G-P-A-A-F-S-A-R-W-A-Q-E  
652 C12 3842.6 F-Q-P-H-P-G-L-Q-K-T-L-E-Q-F-H-L-S-S-M-S-S-  
L-G-G-P-A-A-F-S-A-R-W-A-Q-E  
653 C13 3845.6 F-Q-P-H-P-G-L-Q-M-T-L-E-Q-F-H-L-S-S-M-S-S-  
L-G-G-P-A-A-F-S-A-R-W-A-Q-E  
654 C14 3861.6 F-Q-P-H-P-G-L-Q-F-T-L-E-Q-F-H-L-S-S-M-S-S-  
L-G-G-P-A-A-F-S-A-R-W-A-Q-E  
655 C15 3811.5 F-Q-P-H-P-G-L-Q-P-T-L-E-Q-F-H-L-S-S-M-S-S-  
L-G-G-P-A-A-F-S-A-R-W-A-Q-E  
656 C16 3801.5 F-Q-P-H-P-G-L-Q-S-T-L-E-Q-F-H-L-S-S-M-S-S-  
L-G-G-P-A-A-F-S-A-R-W-A-Q-E  
657 C17 3815.5 F-Q-P-H-P-G-L-Q-T-T-L-E-Q-F-H-L-S-S-M-S-S-  
L-G-G-P-A-A-F-S-A-R-W-A-Q-E  
658 C18 3900.6 F-Q-P-H-P-G-L-Q-W-T-L-E-Q-F-H-L-S-S-M-S-S-  
L-G-G-P-A-A-F-S-A-R-W-A-Q-E  
659 C19 3877.6 F-Q-P-H-P-G-L-Q-Y-T-L-E-Q-F-H-L-S-S-M-S-S-  
L-G-G-P-A-A-F-S-A-R-W-A-Q-E  
660 C20 3813.5 F-Q-P-H-P-G-L-Q-V-T-L-E-Q-F-H-L-S-S-M-S-S-  
L-G-G-P-A-A-F-S-A-R-W-A-Q-E  
661 D 1 3812.6 F-Q-P-H-P-G-L-Q-K-A-L-E-Q-F-H-L-S-S-M-S-S-  
L-G-G-P-A-A-F-S-A-R-W-A-Q-E  
662 D 2 3897.7 F-Q-P-H-P-G-L-Q-K-R-L-E-Q-F-H-L-S-S-M-S-S-  
L-G-G-P-A-A-F-S-A-R-W-A-Q-E  
663 D 3 3855.6 F-Q-P-H-P-G-L-Q-K-N-L-E-Q-F-H-L-S-S-M-S-S-  
L-G-G-P-A-A-F-S-A-R-W-A-Q-E  
664 D 4 3856.6 F-Q-P-H-P-G-L-Q-K-D-L-E-Q-F-H-L-S-S-M-S-S-  
L-G-G-P-A-A-F-S-A-R-W-A-Q-E  
665 D 5 3844.6 F-Q-P-H-P-G-L-Q-K-C-L-E-Q-F-H-L-S-S-M-S-S-  
L-G-G-P-A-A-F-S-A-R-W-A-Q-E  
666 D 6 3869.6 F-Q-P-H-P-G-L-Q-K-Q-L-E-Q-F-H-L-S-S-M-S-S-  
L-G-G-P-A-A-F-S-A-R-W-A-Q-E  
667 D 7 3870.6 F-Q-P-H-P-G-L-Q-K-E-L-E-Q-F-H-L-S-S-M-S-S-  
L-G-G-P-A-A-F-S-A-R-W-A-Q-E  
668 D 8 3798.6 F-Q-P-H-P-G-L-Q-K-G-L-E-Q-F-H-L-S-S-M-S-S-  
L-G-G-P-A-A-F-S-A-R-W-A-Q-E  
669 D 9 3878.6 F-Q-P-H-P-G-L-Q-K-H-L-E-Q-F-H-L-S-S-M-S-S-  
L-G-G-P-A-A-F-S-A-R-W-A-Q-E  
670 D10 3854.7 F-Q-P-H-P-G-L-Q-K-I-L-E-Q-F-H-L-S-S-M-S-S-  
L-G-G-P-A-A-F-S-A-R-W-A-Q-E  
671 D11 3854.7 F-Q-P-H-P-G-L-Q-K-L-L-E-Q-F-H-L-S-S-M-S-S-  
L-G-G-P-A-A-F-S-A-R-W-A-Q-E  
672 D12 3869.7 F-Q-P-H-P-G-L-Q-K-K-L-E-Q-F-H-L-S-S-M-S-S-  
L-G-G-P-A-A-F-S-A-R-W-A-Q-E  
673 D13 3872.7 F-Q-P-H-P-G-L-Q-K-M-L-E-Q-F-H-L-S-S-M-S-S-

L-G-G-P-A-A-F-S-A-R-W-A-Q-E  
 674 D14 3888.7 F-Q-P-H-P-G-L-Q-K-F-L-E-Q-F-H-L-S-S-M-S-S-  
 L-G-G-P-A-A-F-S-A-R-W-A-Q-E  
 675 D15 3838.6 F-Q-P-H-P-G-L-Q-K-P-L-E-Q-F-H-L-S-S-M-S-S-  
 L-G-G-P-A-A-F-S-A-R-W-A-Q-E  
 676 D16 3828.6 F-Q-P-H-P-G-L-Q-K-S-L-E-Q-F-H-L-S-S-M-S-S-  
 L-G-G-P-A-A-F-S-A-R-W-A-Q-E  
 677 D17 3842.6 F-Q-P-H-P-G-L-Q-K-T-L-E-Q-F-H-L-S-S-M-S-S-  
 L-G-G-P-A-A-F-S-A-R-W-A-Q-E  
 678 D18 3927.7 F-Q-P-H-P-G-L-Q-K-W-L-E-Q-F-H-L-S-S-M-S-S-  
 L-G-G-P-A-A-F-S-A-R-W-A-Q-E  
 679 D19 3904.7 F-Q-P-H-P-G-L-Q-K-Y-L-E-Q-F-H-L-S-S-M-S-S-  
 L-G-G-P-A-A-F-S-A-R-W-A-Q-E  
 680 D20 3840.6 F-Q-P-H-P-G-L-Q-K-V-L-E-Q-F-H-L-S-S-M-S-S-  
 L-G-G-P-A-A-F-S-A-R-W-A-Q-E  
 681 E 1 3800.5 F-Q-P-H-P-G-L-Q-K-T-A-E-Q-F-H-L-S-S-M-S-S-  
 L-G-G-P-A-A-F-S-A-R-W-A-Q-E  
 682 E 2 3885.6 F-Q-P-H-P-G-L-Q-K-T-R-E-Q-F-H-L-S-S-M-S-S-  
 L-G-G-P-A-A-F-S-A-R-W-A-Q-E  
 683 E 3 3843.5 F-Q-P-H-P-G-L-Q-K-T-N-E-Q-F-H-L-S-S-M-S-S-  
 L-G-G-P-A-A-F-S-A-R-W-A-Q-E  
 684 E 4 3844.5 F-Q-P-H-P-G-L-Q-K-T-D-E-Q-F-H-L-S-S-M-S-S-  
 L-G-G-P-A-A-F-S-A-R-W-A-Q-E  
 685 E 5 3832.5 F-Q-P-H-P-G-L-Q-K-T-C-E-Q-F-H-L-S-S-M-S-S-  
 L-G-G-P-A-A-F-S-A-R-W-A-Q-E  
 686 E 6 3857.5 F-Q-P-H-P-G-L-Q-K-T-Q-E-Q-F-H-L-S-S-M-S-S-  
 L-G-G-P-A-A-F-S-A-R-W-A-Q-E  
 687 E 7 3858.5 F-Q-P-H-P-G-L-Q-K-T-E-E-Q-F-H-L-S-S-M-S-S-  
 L-G-G-P-A-A-F-S-A-R-W-A-Q-E  
 688 E 8 3786.5 F-Q-P-H-P-G-L-Q-K-T-G-E-Q-F-H-L-S-S-M-S-S-  
 L-G-G-P-A-A-F-S-A-R-W-A-Q-E  
 689 E 9 3866.5 F-Q-P-H-P-G-L-Q-K-T-H-E-Q-F-H-L-S-S-M-S-S-  
 L-G-G-P-A-A-F-S-A-R-W-A-Q-E  
 690 E10 3842.6 F-Q-P-H-P-G-L-Q-K-T-I-E-Q-F-H-L-S-S-M-S-S-  
 L-G-G-P-A-A-F-S-A-R-W-A-Q-E  
 691 E11 3842.6 F-Q-P-H-P-G-L-Q-K-T-L-E-Q-F-H-L-S-S-M-S-S-  
 L-G-G-P-A-A-F-S-A-R-W-A-Q-E  
 692 E12 3857.6 F-Q-P-H-P-G-L-Q-K-T-K-E-Q-F-H-L-S-S-M-S-S-  
 L-G-G-P-A-A-F-S-A-R-W-A-Q-E  
 693 E13 3860.6 F-Q-P-H-P-G-L-Q-K-T-M-E-Q-F-H-L-S-S-M-S-S-  
 L-G-G-P-A-A-F-S-A-R-W-A-Q-E  
 694 E14 3876.6 F-Q-P-H-P-G-L-Q-K-T-F-E-Q-F-H-L-S-S-M-S-S-  
 L-G-G-P-A-A-F-S-A-R-W-A-Q-E  
 695 E15 3826.5 F-Q-P-H-P-G-L-Q-K-T-P-E-Q-F-H-L-S-S-M-S-S-  
 L-G-G-P-A-A-F-S-A-R-W-A-Q-E  
 696 E16 3816.5 F-Q-P-H-P-G-L-Q-K-T-S-E-Q-F-H-L-S-S-M-S-S-  
 L-G-G-P-A-A-F-S-A-R-W-A-Q-E  
 697 E17 3830.5 F-Q-P-H-P-G-L-Q-K-T-T-E-Q-F-H-L-S-S-M-S-S-  
 L-G-G-P-A-A-F-S-A-R-W-A-Q-E  
 698 E18 3915.6 F-Q-P-H-P-G-L-Q-K-T-W-E-Q-F-H-L-S-S-M-S-S-  
 L-G-G-P-A-A-F-S-A-R-W-A-Q-E  
 699 E19 3892.6 F-Q-P-H-P-G-L-Q-K-T-Y-E-Q-F-H-L-S-S-M-S-S-  
 L-G-G-P-A-A-F-S-A-R-W-A-Q-E  
 700 E20 3828.5 F-Q-P-H-P-G-L-Q-K-T-V-E-Q-F-H-L-S-S-M-S-S-

L-G-G-P-A-A-F-S-A-R-W-A-Q-E  
 701 F 1 3784.6 F-Q-P-H-P-G-L-Q-K-T-L-A-Q-F-H-L-S-S-M-S-S-  
 L-G-G-P-A-A-F-S-A-R-W-A-Q-E  
 702 F 2 3869.7 F-Q-P-H-P-G-L-Q-K-T-L-R-Q-F-H-L-S-S-M-S-S-  
 L-G-G-P-A-A-F-S-A-R-W-A-Q-E  
 703 F 3 3827.6 F-Q-P-H-P-G-L-Q-K-T-L-N-Q-F-H-L-S-S-M-S-S-  
 L-G-G-P-A-A-F-S-A-R-W-A-Q-E  
 704 F 4 3828.6 F-Q-P-H-P-G-L-Q-K-T-L-D-Q-F-H-L-S-S-M-S-S-  
 L-G-G-P-A-A-F-S-A-R-W-A-Q-E  
 705 F 5 3816.6 F-Q-P-H-P-G-L-Q-K-T-L-C-Q-F-H-L-S-S-M-S-S-  
 L-G-G-P-A-A-F-S-A-R-W-A-Q-E  
 706 F 6 3841.6 F-Q-P-H-P-G-L-Q-K-T-L-Q-Q-F-H-L-S-S-M-S-S-  
 L-G-G-P-A-A-F-S-A-R-W-A-Q-E  
 707 F 7 3842.6 F-Q-P-H-P-G-L-Q-K-T-L-E-Q-F-H-L-S-S-M-S-S-  
 L-G-G-P-A-A-F-S-A-R-W-A-Q-E  
 708 F 8 3770.6 F-Q-P-H-P-G-L-Q-K-T-L-G-Q-F-H-L-S-S-M-S-S-  
 L-G-G-P-A-A-F-S-A-R-W-A-Q-E  
 709 F 9 3850.6 F-Q-P-H-P-G-L-Q-K-T-L-H-Q-F-H-L-S-S-M-S-S-  
 L-G-G-P-A-A-F-S-A-R-W-A-Q-E  
 710 F10 3826.7 F-Q-P-H-P-G-L-Q-K-T-L-I-Q-F-H-L-S-S-M-S-S-  
 L-G-G-P-A-A-F-S-A-R-W-A-Q-E  
 711 F11 3826.7 F-Q-P-H-P-G-L-Q-K-T-L-L-Q-F-H-L-S-S-M-S-S-  
 L-G-G-P-A-A-F-S-A-R-W-A-Q-E  
 712 F12 3841.7 F-Q-P-H-P-G-L-Q-K-T-L-K-Q-F-H-L-S-S-M-S-S-  
 L-G-G-P-A-A-F-S-A-R-W-A-Q-E  
 713 F13 3844.7 F-Q-P-H-P-G-L-Q-K-T-L-M-Q-F-H-L-S-S-M-S-S-  
 L-G-G-P-A-A-F-S-A-R-W-A-Q-E  
 714 F14 3860.7 F-Q-P-H-P-G-L-Q-K-T-L-F-Q-F-H-L-S-S-M-S-S-  
 L-G-G-P-A-A-F-S-A-R-W-A-Q-E  
 715 F15 3810.6 F-Q-P-H-P-G-L-Q-K-T-L-P-Q-F-H-L-S-S-M-S-S-  
 L-G-G-P-A-A-F-S-A-R-W-A-Q-E  
 716 F16 3800.6 F-Q-P-H-P-G-L-Q-K-T-L-S-Q-F-H-L-S-S-M-S-S-  
 L-G-G-P-A-A-F-S-A-R-W-A-Q-E  
 717 F17 3814.6 F-Q-P-H-P-G-L-Q-K-T-L-T-Q-F-H-L-S-S-M-S-S-  
 L-G-G-P-A-A-F-S-A-R-W-A-Q-E  
 718 F18 3899.7 F-Q-P-H-P-G-L-Q-K-T-L-W-Q-F-H-L-S-S-M-S-S-  
 L-G-G-P-A-A-F-S-A-R-W-A-Q-E  
 719 F19 3876.7 F-Q-P-H-P-G-L-Q-K-T-L-Y-Q-F-H-L-S-S-M-S-S-  
 L-G-G-P-A-A-F-S-A-R-W-A-Q-E  
 720 F20 3812.6 F-Q-P-H-P-G-L-Q-K-T-L-V-Q-F-H-L-S-S-M-S-S-  
 L-G-G-P-A-A-F-S-A-R-W-A-Q-E  
 721 G 1 3785.6 F-Q-P-H-P-G-L-Q-K-T-L-E-A-F-H-L-S-S-M-S-S-  
 L-G-G-P-A-A-F-S-A-R-W-A-Q-E  
 722 G 2 3870.7 F-Q-P-H-P-G-L-Q-K-T-L-E-R-F-H-L-S-S-M-S-S-  
 L-G-G-P-A-A-F-S-A-R-W-A-Q-E  
 723 G 3 3828.6 F-Q-P-H-P-G-L-Q-K-T-L-E-N-F-H-L-S-S-M-S-S-  
 L-G-G-P-A-A-F-S-A-R-W-A-Q-E  
 724 G 4 3829.6 F-Q-P-H-P-G-L-Q-K-T-L-E-D-F-H-L-S-S-M-S-S-  
 L-G-G-P-A-A-F-S-A-R-W-A-Q-E  
 725 G 5 3817.6 F-Q-P-H-P-G-L-Q-K-T-L-E-C-F-H-L-S-S-M-S-S-  
 L-G-G-P-A-A-F-S-A-R-W-A-Q-E  
 726 G 6 3842.6 F-Q-P-H-P-G-L-Q-K-T-L-E-Q-F-H-L-S-S-M-S-S-  
 L-G-G-P-A-A-F-S-A-R-W-A-Q-E  
 727 G 7 3843.6 F-Q-P-H-P-G-L-Q-K-T-L-E-E-F-H-L-S-S-M-S-S-

L-G-G-P-A-A-F-S-A-R-W-A-Q-E  
728 G 8 3771.6 F-Q-P-H-P-G-L-Q-K-T-L-E-G-F-H-L-S-S-M-S-S-  
L-G-G-P-A-A-F-S-A-R-W-A-Q-E  
729 G 9 3851.6 F-Q-P-H-P-G-L-Q-K-T-L-E-H-F-H-L-S-S-M-S-S-  
L-G-G-P-A-A-F-S-A-R-W-A-Q-E  
730 G10 3827.7 F-Q-P-H-P-G-L-Q-K-T-L-E-I-F-H-L-S-S-M-S-S-  
L-G-G-P-A-A-F-S-A-R-W-A-Q-E  
731 G11 3827.7 F-Q-P-H-P-G-L-Q-K-T-L-E-L-F-H-L-S-S-M-S-S-  
L-G-G-P-A-A-F-S-A-R-W-A-Q-E  
732 G12 3842.7 F-Q-P-H-P-G-L-Q-K-T-L-E-K-F-H-L-S-S-M-S-S-  
L-G-G-P-A-A-F-S-A-R-W-A-Q-E  
733 G13 3845.7 F-Q-P-H-P-G-L-Q-K-T-L-E-M-F-H-L-S-S-M-S-S-  
L-G-G-P-A-A-F-S-A-R-W-A-Q-E  
734 G14 3861.7 F-Q-P-H-P-G-L-Q-K-T-L-E-F-F-H-L-S-S-M-S-S-  
L-G-G-P-A-A-F-S-A-R-W-A-Q-E  
735 G15 3811.6 F-Q-P-H-P-G-L-Q-K-T-L-E-P-F-H-L-S-S-M-S-S-  
L-G-G-P-A-A-F-S-A-R-W-A-Q-E  
736 G16 3801.6 F-Q-P-H-P-G-L-Q-K-T-L-E-S-F-H-L-S-S-M-S-S-  
L-G-G-P-A-A-F-S-A-R-W-A-Q-E  
737 G17 3815.6 F-Q-P-H-P-G-L-Q-K-T-L-E-T-F-H-L-S-S-M-S-S-  
L-G-G-P-A-A-F-S-A-R-W-A-Q-E  
738 G18 3900.7 F-Q-P-H-P-G-L-Q-K-T-L-E-W-F-H-L-S-S-M-S-S-  
L-G-G-P-A-A-F-S-A-R-W-A-Q-E  
739 G19 3877.7 F-Q-P-H-P-G-L-Q-K-T-L-E-Y-F-H-L-S-S-M-S-S-  
L-G-G-P-A-A-F-S-A-R-W-A-Q-E  
740 G20 3813.6 F-Q-P-H-P-G-L-Q-K-T-L-E-V-F-H-L-S-S-M-S-S-  
L-G-G-P-A-A-F-S-A-R-W-A-Q-E  
741 H 1 3766.5 F-Q-P-H-P-G-L-Q-K-T-L-E-Q-A-H-L-S-S-M-S-S-  
L-G-G-P-A-A-F-S-A-R-W-A-Q-E  
742 H 2 3851.6 F-Q-P-H-P-G-L-Q-K-T-L-E-Q-R-H-L-S-S-M-S-S-  
L-G-G-P-A-A-F-S-A-R-W-A-Q-E  
743 H 3 3809.5 F-Q-P-H-P-G-L-Q-K-T-L-E-Q-N-H-L-S-S-M-S-S-  
L-G-G-P-A-A-F-S-A-R-W-A-Q-E  
744 H 4 3810.5 F-Q-P-H-P-G-L-Q-K-T-L-E-Q-D-H-L-S-S-M-S-S-  
L-G-G-P-A-A-F-S-A-R-W-A-Q-E  
745 H 5 3798.5 F-Q-P-H-P-G-L-Q-K-T-L-E-Q-C-H-L-S-S-M-S-S-  
L-G-G-P-A-A-F-S-A-R-W-A-Q-E  
746 H 6 3823.5 F-Q-P-H-P-G-L-Q-K-T-L-E-Q-Q-H-L-S-S-M-S-S-  
L-G-G-P-A-A-F-S-A-R-W-A-Q-E  
747 H 7 3824.5 F-Q-P-H-P-G-L-Q-K-T-L-E-Q-E-H-L-S-S-M-S-S-  
L-G-G-P-A-A-F-S-A-R-W-A-Q-E  
748 H 8 3752.5 F-Q-P-H-P-G-L-Q-K-T-L-E-Q-G-H-L-S-S-M-S-S-  
L-G-G-P-A-A-F-S-A-R-W-A-Q-E  
749 H 9 3832.5 F-Q-P-H-P-G-L-Q-K-T-L-E-Q-H-H-L-S-S-M-S-S-  
L-G-G-P-A-A-F-S-A-R-W-A-Q-E  
750 H10 3808.6 F-Q-P-H-P-G-L-Q-K-T-L-E-Q-I-H-L-S-S-M-S-S-  
L-G-G-P-A-A-F-S-A-R-W-A-Q-E  
751 H11 3808.6 F-Q-P-H-P-G-L-Q-K-T-L-E-Q-L-H-L-S-S-M-S-S-  
L-G-G-P-A-A-F-S-A-R-W-A-Q-E  
752 H12 3823.6 F-Q-P-H-P-G-L-Q-K-T-L-E-Q-K-H-L-S-S-M-S-S-  
L-G-G-P-A-A-F-S-A-R-W-A-Q-E  
753 H13 3826.6 F-Q-P-H-P-G-L-Q-K-T-L-E-Q-M-H-L-S-S-M-S-S-  
L-G-G-P-A-A-F-S-A-R-W-A-Q-E  
754 H14 3842.6 F-Q-P-H-P-G-L-Q-K-T-L-E-Q-F-H-L-S-S-M-S-S-

L-G-G-P-A-A-F-S-A-R-W-A-Q-E  
755 H15 3792.5 F-Q-P-H-P-G-L-Q-K-T-L-E-Q-P-H-L-S-S-M-S-S-  
L-G-G-P-A-A-F-S-A-R-W-A-Q-E  
756 H16 3782.5 F-Q-P-H-P-G-L-Q-K-T-L-E-Q-S-H-L-S-S-M-S-S-  
L-G-G-P-A-A-F-S-A-R-W-A-Q-E  
757 H17 3796.5 F-Q-P-H-P-G-L-Q-K-T-L-E-Q-T-H-L-S-S-M-S-S-  
L-G-G-P-A-A-F-S-A-R-W-A-Q-E  
758 H18 3881.6 F-Q-P-H-P-G-L-Q-K-T-L-E-Q-W-H-L-S-S-M-S-S-  
L-G-G-P-A-A-F-S-A-R-W-A-Q-E  
759 H19 3858.6 F-Q-P-H-P-G-L-Q-K-T-L-E-Q-Y-H-L-S-S-M-S-S-  
L-G-G-P-A-A-F-S-A-R-W-A-Q-E  
760 H20 3794.5 F-Q-P-H-P-G-L-Q-K-T-L-E-Q-V-H-L-S-S-M-S-S-  
L-G-G-P-A-A-F-S-A-R-W-A-Q-E  
761 I 1 3776.6 F-Q-P-H-P-G-L-Q-K-T-L-E-Q-F-A-L-S-S-M-S-S-  
L-G-G-P-A-A-F-S-A-R-W-A-Q-E  
762 I 2 3861.7 F-Q-P-H-P-G-L-Q-K-T-L-E-Q-F-R-L-S-S-M-S-S-  
L-G-G-P-A-A-F-S-A-R-W-A-Q-E  
763 I 3 3819.6 F-Q-P-H-P-G-L-Q-K-T-L-E-Q-F-N-L-S-S-M-S-S-  
L-G-G-P-A-A-F-S-A-R-W-A-Q-E  
764 I 4 3820.6 F-Q-P-H-P-G-L-Q-K-T-L-E-Q-F-D-L-S-S-M-S-S-  
L-G-G-P-A-A-F-S-A-R-W-A-Q-E  
765 I 5 3808.6 F-Q-P-H-P-G-L-Q-K-T-L-E-Q-F-C-L-S-S-M-S-S-  
L-G-G-P-A-A-F-S-A-R-W-A-Q-E  
766 I 6 3833.6 F-Q-P-H-P-G-L-Q-K-T-L-E-Q-F-Q-L-S-S-M-S-S-  
L-G-G-P-A-A-F-S-A-R-W-A-Q-E  
767 I 7 3834.6 F-Q-P-H-P-G-L-Q-K-T-L-E-Q-F-E-L-S-S-M-S-S-  
L-G-G-P-A-A-F-S-A-R-W-A-Q-E  
768 I 8 3762.6 F-Q-P-H-P-G-L-Q-K-T-L-E-Q-F-G-L-S-S-M-S-S-  
L-G-G-P-A-A-F-S-A-R-W-A-Q-E  
769 I 9 3842.6 F-Q-P-H-P-G-L-Q-K-T-L-E-Q-F-H-L-S-S-M-S-S-  
L-G-G-P-A-A-F-S-A-R-W-A-Q-E  
770 I10 3818.7 F-Q-P-H-P-G-L-Q-K-T-L-E-Q-F-I-L-S-S-M-S-S-  
L-G-G-P-A-A-F-S-A-R-W-A-Q-E  
771 I11 3818.7 F-Q-P-H-P-G-L-Q-K-T-L-E-Q-F-L-L-S-S-M-S-S-  
L-G-G-P-A-A-F-S-A-R-W-A-Q-E  
772 I12 3833.7 F-Q-P-H-P-G-L-Q-K-T-L-E-Q-F-K-L-S-S-M-S-S-  
L-G-G-P-A-A-F-S-A-R-W-A-Q-E  
773 I13 3836.7 F-Q-P-H-P-G-L-Q-K-T-L-E-Q-F-M-L-S-S-M-S-S-  
L-G-G-P-A-A-F-S-A-R-W-A-Q-E  
774 I14 3852.7 F-Q-P-H-P-G-L-Q-K-T-L-E-Q-F-F-L-S-S-M-S-S-  
L-G-G-P-A-A-F-S-A-R-W-A-Q-E  
775 I15 3802.6 F-Q-P-H-P-G-L-Q-K-T-L-E-Q-F-P-L-S-S-M-S-S-  
L-G-G-P-A-A-F-S-A-R-W-A-Q-E  
776 I16 3792.6 F-Q-P-H-P-G-L-Q-K-T-L-E-Q-F-S-L-S-S-M-S-S-  
L-G-G-P-A-A-F-S-A-R-W-A-Q-E  
777 I17 3806.6 F-Q-P-H-P-G-L-Q-K-T-L-E-Q-F-T-L-S-S-M-S-S-  
L-G-G-P-A-A-F-S-A-R-W-A-Q-E  
778 I18 3891.7 F-Q-P-H-P-G-L-Q-K-T-L-E-Q-F-W-L-S-S-M-S-S-  
L-G-G-P-A-A-F-S-A-R-W-A-Q-E  
779 I19 3868.7 F-Q-P-H-P-G-L-Q-K-T-L-E-Q-F-Y-L-S-S-M-S-S-  
L-G-G-P-A-A-F-S-A-R-W-A-Q-E  
780 I20 3804.6 F-Q-P-H-P-G-L-Q-K-T-L-E-Q-F-V-L-S-S-M-S-S-  
L-G-G-P-A-A-F-S-A-R-W-A-Q-E  
781 J 1 3800.5 F-Q-P-H-P-G-L-Q-K-T-L-E-Q-F-H-A-S-S-M-S-S-

L-G-G-P-A-A-F-S-A-R-W-A-Q-E  
782 J 2 3885.6 F-Q-P-H-P-G-L-Q-K-T-L-E-Q-F-H-R-S-S-M-S-S-  
L-G-G-P-A-A-F-S-A-R-W-A-Q-E  
783 J 3 3843.5 F-Q-P-H-P-G-L-Q-K-T-L-E-Q-F-H-N-S-S-M-S-S-  
L-G-G-P-A-A-F-S-A-R-W-A-Q-E  
784 J 4 3844.5 F-Q-P-H-P-G-L-Q-K-T-L-E-Q-F-H-D-S-S-M-S-S-  
L-G-G-P-A-A-F-S-A-R-W-A-Q-E  
785 J 5 3832.5 F-Q-P-H-P-G-L-Q-K-T-L-E-Q-F-H-C-S-S-M-S-S-  
L-G-G-P-A-A-F-S-A-R-W-A-Q-E  
786 J 6 3857.5 F-Q-P-H-P-G-L-Q-K-T-L-E-Q-F-H-Q-S-S-M-S-S-  
L-G-G-P-A-A-F-S-A-R-W-A-Q-E  
787 J 7 3858.5 F-Q-P-H-P-G-L-Q-K-T-L-E-Q-F-H-E-S-S-M-S-S-  
L-G-G-P-A-A-F-S-A-R-W-A-Q-E  
788 J 8 3786.5 F-Q-P-H-P-G-L-Q-K-T-L-E-Q-F-H-G-S-S-M-S-S-  
L-G-G-P-A-A-F-S-A-R-W-A-Q-E  
789 J 9 3866.5 F-Q-P-H-P-G-L-Q-K-T-L-E-Q-F-H-H-S-S-M-S-S-  
L-G-G-P-A-A-F-S-A-R-W-A-Q-E  
790 J10 3842.6 F-Q-P-H-P-G-L-Q-K-T-L-E-Q-F-H-I-S-S-M-S-S-  
L-G-G-P-A-A-F-S-A-R-W-A-Q-E  
791 J11 3842.6 F-Q-P-H-P-G-L-Q-K-T-L-E-Q-F-H-L-S-S-M-S-S-  
L-G-G-P-A-A-F-S-A-R-W-A-Q-E  
792 J12 3857.6 F-Q-P-H-P-G-L-Q-K-T-L-E-Q-F-H-K-S-S-M-S-S-  
L-G-G-P-A-A-F-S-A-R-W-A-Q-E  
793 J13 3860.6 F-Q-P-H-P-G-L-Q-K-T-L-E-Q-F-H-M-S-S-M-S-S-  
L-G-G-P-A-A-F-S-A-R-W-A-Q-E  
794 J14 3876.6 F-Q-P-H-P-G-L-Q-K-T-L-E-Q-F-H-F-S-S-M-S-S-  
L-G-G-P-A-A-F-S-A-R-W-A-Q-E  
795 J15 3826.5 F-Q-P-H-P-G-L-Q-K-T-L-E-Q-F-H-P-S-S-M-S-S-  
L-G-G-P-A-A-F-S-A-R-W-A-Q-E  
796 J16 3816.5 F-Q-P-H-P-G-L-Q-K-T-L-E-Q-F-H-S-S-S-M-S-S-  
L-G-G-P-A-A-F-S-A-R-W-A-Q-E  
797 J17 3830.5 F-Q-P-H-P-G-L-Q-K-T-L-E-Q-F-H-T-S-S-M-S-S-  
L-G-G-P-A-A-F-S-A-R-W-A-Q-E  
798 J18 3915.6 F-Q-P-H-P-G-L-Q-K-T-L-E-Q-F-H-W-S-S-M-S-S-  
L-G-G-P-A-A-F-S-A-R-W-A-Q-E  
799 J19 3892.6 F-Q-P-H-P-G-L-Q-K-T-L-E-Q-F-H-Y-S-S-M-S-S-  
L-G-G-P-A-A-F-S-A-R-W-A-Q-E  
800 J20 3828.5 F-Q-P-H-P-G-L-Q-K-T-L-E-Q-F-H-V-S-S-M-S-S-  
L-G-G-P-A-A-F-S-A-R-W-A-Q-E  
801 K 1 3826.6 F-Q-P-H-P-G-L-Q-K-T-L-E-Q-F-H-L-A-S-M-S-S-  
L-G-G-P-A-A-F-S-A-R-W-A-Q-E  
802 K 2 3911.7 F-Q-P-H-P-G-L-Q-K-T-L-E-Q-F-H-L-R-S-M-S-S-  
L-G-G-P-A-A-F-S-A-R-W-A-Q-E  
803 K 3 3869.6 F-Q-P-H-P-G-L-Q-K-T-L-E-Q-F-H-L-N-S-M-S-S-  
L-G-G-P-A-A-F-S-A-R-W-A-Q-E  
804 K 4 3870.6 F-Q-P-H-P-G-L-Q-K-T-L-E-Q-F-H-L-D-S-M-S-S-  
L-G-G-P-A-A-F-S-A-R-W-A-Q-E  
805 K 5 3858.6 F-Q-P-H-P-G-L-Q-K-T-L-E-Q-F-H-L-C-S-M-S-S-  
L-G-G-P-A-A-F-S-A-R-W-A-Q-E  
806 K 6 3883.6 F-Q-P-H-P-G-L-Q-K-T-L-E-Q-F-H-L-Q-S-M-S-S-  
L-G-G-P-A-A-F-S-A-R-W-A-Q-E  
807 K 7 3884.6 F-Q-P-H-P-G-L-Q-K-T-L-E-Q-F-H-L-E-S-M-S-S-  
L-G-G-P-A-A-F-S-A-R-W-A-Q-E  
808 K 8 3812.6 F-Q-P-H-P-G-L-Q-K-T-L-E-Q-F-H-L-G-S-M-S-S-

L-G-G-P-A-A-F-S-A-R-W-A-Q-E  
809 K 9 3892.6 F-Q-P-H-P-G-L-Q-K-T-L-E-Q-F-H-L-H-S-M-S-S-  
L-G-G-P-A-A-F-S-A-R-W-A-Q-E  
810 K10 3868.7 F-Q-P-H-P-G-L-Q-K-T-L-E-Q-F-H-L-I-S-M-S-S-  
L-G-G-P-A-A-F-S-A-R-W-A-Q-E  
811 K11 3868.7 F-Q-P-H-P-G-L-Q-K-T-L-E-Q-F-H-L-L-S-M-S-S-  
L-G-G-P-A-A-F-S-A-R-W-A-Q-E  
812 K12 3883.7 F-Q-P-H-P-G-L-Q-K-T-L-E-Q-F-H-L-K-S-M-S-S-  
L-G-G-P-A-A-F-S-A-R-W-A-Q-E  
813 K13 3886.7 F-Q-P-H-P-G-L-Q-K-T-L-E-Q-F-H-L-M-S-M-S-S-  
L-G-G-P-A-A-F-S-A-R-W-A-Q-E  
814 K14 3902.7 F-Q-P-H-P-G-L-Q-K-T-L-E-Q-F-H-L-F-S-M-S-S-  
L-G-G-P-A-A-F-S-A-R-W-A-Q-E  
815 K15 3852.6 F-Q-P-H-P-G-L-Q-K-T-L-E-Q-F-H-L-P-S-M-S-S-  
L-G-G-P-A-A-F-S-A-R-W-A-Q-E  
816 K16 3842.6 F-Q-P-H-P-G-L-Q-K-T-L-E-Q-F-H-L-S-S-M-S-S-  
L-G-G-P-A-A-F-S-A-R-W-A-Q-E  
817 K17 3856.6 F-Q-P-H-P-G-L-Q-K-T-L-E-Q-F-H-L-T-S-M-S-S-  
L-G-G-P-A-A-F-S-A-R-W-A-Q-E  
818 K18 3941.7 F-Q-P-H-P-G-L-Q-K-T-L-E-Q-F-H-L-W-S-M-S-S-  
L-G-G-P-A-A-F-S-A-R-W-A-Q-E  
819 K19 3918.7 F-Q-P-H-P-G-L-Q-K-T-L-E-Q-F-H-L-Y-S-M-S-S-  
L-G-G-P-A-A-F-S-A-R-W-A-Q-E  
820 K20 3854.6 F-Q-P-H-P-G-L-Q-K-T-L-E-Q-F-H-L-V-S-M-S-S-  
L-G-G-P-A-A-F-S-A-R-W-A-Q-E  
821 L 1 3826.6 F-Q-P-H-P-G-L-Q-K-T-L-E-Q-F-H-L-S-A-M-S-S-  
L-G-G-P-A-A-F-S-A-R-W-A-Q-E  
822 L 2 3911.7 F-Q-P-H-P-G-L-Q-K-T-L-E-Q-F-H-L-S-R-M-S-S-  
L-G-G-P-A-A-F-S-A-R-W-A-Q-E  
823 L 3 3869.6 F-Q-P-H-P-G-L-Q-K-T-L-E-Q-F-H-L-S-N-M-S-S-  
L-G-G-P-A-A-F-S-A-R-W-A-Q-E  
824 L 4 3870.6 F-Q-P-H-P-G-L-Q-K-T-L-E-Q-F-H-L-S-D-M-S-S-  
L-G-G-P-A-A-F-S-A-R-W-A-Q-E  
825 L 5 3858.6 F-Q-P-H-P-G-L-Q-K-T-L-E-Q-F-H-L-S-C-M-S-S-  
L-G-G-P-A-A-F-S-A-R-W-A-Q-E  
826 L 6 3883.6 F-Q-P-H-P-G-L-Q-K-T-L-E-Q-F-H-L-S-Q-M-S-S-  
L-G-G-P-A-A-F-S-A-R-W-A-Q-E  
827 L 7 3884.6 F-Q-P-H-P-G-L-Q-K-T-L-E-Q-F-H-L-S-E-M-S-S-  
L-G-G-P-A-A-F-S-A-R-W-A-Q-E  
828 L 8 3812.6 F-Q-P-H-P-G-L-Q-K-T-L-E-Q-F-H-L-S-G-M-S-S-  
L-G-G-P-A-A-F-S-A-R-W-A-Q-E  
829 L 9 3892.6 F-Q-P-H-P-G-L-Q-K-T-L-E-Q-F-H-L-S-H-M-S-S-  
L-G-G-P-A-A-F-S-A-R-W-A-Q-E  
830 L10 3868.7 F-Q-P-H-P-G-L-Q-K-T-L-E-Q-F-H-L-S-I-M-S-S-  
L-G-G-P-A-A-F-S-A-R-W-A-Q-E  
831 L11 3868.7 F-Q-P-H-P-G-L-Q-K-T-L-E-Q-F-H-L-S-L-M-S-S-  
L-G-G-P-A-A-F-S-A-R-W-A-Q-E  
832 L12 3883.7 F-Q-P-H-P-G-L-Q-K-T-L-E-Q-F-H-L-S-K-M-S-S-  
L-G-G-P-A-A-F-S-A-R-W-A-Q-E  
833 L13 3886.7 F-Q-P-H-P-G-L-Q-K-T-L-E-Q-F-H-L-S-M-M-S-S-  
L-G-G-P-A-A-F-S-A-R-W-A-Q-E  
834 L14 3902.7 F-Q-P-H-P-G-L-Q-K-T-L-E-Q-F-H-L-S-F-M-S-S-  
L-G-G-P-A-A-F-S-A-R-W-A-Q-E  
835 L15 3852.6 F-Q-P-H-P-G-L-Q-K-T-L-E-Q-F-H-L-S-P-M-S-S-

L-G-G-P-A-A-F-S-A-R-W-A-Q-E  
 836 L16 3842.6 F-Q-P-H-P-G-L-Q-K-T-L-E-Q-F-H-L-S-S-M-S-S-  
 L-G-G-P-A-A-F-S-A-R-W-A-Q-E  
 837 L17 3856.6 F-Q-P-H-P-G-L-Q-K-T-L-E-Q-F-H-L-S-T-M-S-S-  
 L-G-G-P-A-A-F-S-A-R-W-A-Q-E  
 838 L18 3941.7 F-Q-P-H-P-G-L-Q-K-T-L-E-Q-F-H-L-S-W-M-S-S-  
 L-G-G-P-A-A-F-S-A-R-W-A-Q-E  
 839 L19 3918.7 F-Q-P-H-P-G-L-Q-K-T-L-E-Q-F-H-L-S-Y-M-S-S-  
 L-G-G-P-A-A-F-S-A-R-W-A-Q-E  
 840 L20 3854.6 F-Q-P-H-P-G-L-Q-K-T-L-E-Q-F-H-L-S-V-M-S-S-  
 L-G-G-P-A-A-F-S-A-R-W-A-Q-E  
 841 M 1 3782.5 F-Q-P-H-P-G-L-Q-K-T-L-E-Q-F-H-L-S-S-A-S-S-  
 L-G-G-P-A-A-F-S-A-R-W-A-Q-E  
 842 M 2 3867.6 F-Q-P-H-P-G-L-Q-K-T-L-E-Q-F-H-L-S-S-R-S-S-  
 L-G-G-P-A-A-F-S-A-R-W-A-Q-E  
 843 M 3 3825.5 F-Q-P-H-P-G-L-Q-K-T-L-E-Q-F-H-L-S-S-N-S-S-  
 L-G-G-P-A-A-F-S-A-R-W-A-Q-E  
 844 M 4 3826.5 F-Q-P-H-P-G-L-Q-K-T-L-E-Q-F-H-L-S-S-D-S-S-  
 L-G-G-P-A-A-F-S-A-R-W-A-Q-E  
 845 M 5 3814.5 F-Q-P-H-P-G-L-Q-K-T-L-E-Q-F-H-L-S-S-C-S-S-  
 L-G-G-P-A-A-F-S-A-R-W-A-Q-E  
 846 M 6 3839.5 F-Q-P-H-P-G-L-Q-K-T-L-E-Q-F-H-L-S-S-Q-S-S-  
 L-G-G-P-A-A-F-S-A-R-W-A-Q-E  
 847 M 7 3840.5 F-Q-P-H-P-G-L-Q-K-T-L-E-Q-F-H-L-S-S-E-S-S-  
 L-G-G-P-A-A-F-S-A-R-W-A-Q-E  
 848 M 8 3768.5 F-Q-P-H-P-G-L-Q-K-T-L-E-Q-F-H-L-S-S-G-S-S-  
 L-G-G-P-A-A-F-S-A-R-W-A-Q-E  
 849 M 9 3848.5 F-Q-P-H-P-G-L-Q-K-T-L-E-Q-F-H-L-S-S-H-S-S-  
 L-G-G-P-A-A-F-S-A-R-W-A-Q-E  
 850 M10 3824.6 F-Q-P-H-P-G-L-Q-K-T-L-E-Q-F-H-L-S-S-I-S-S-  
 L-G-G-P-A-A-F-S-A-R-W-A-Q-E  
 851 M11 3824.6 F-Q-P-H-P-G-L-Q-K-T-L-E-Q-F-H-L-S-S-L-S-S-  
 L-G-G-P-A-A-F-S-A-R-W-A-Q-E  
 852 M12 3839.6 F-Q-P-H-P-G-L-Q-K-T-L-E-Q-F-H-L-S-S-K-S-S-  
 L-G-G-P-A-A-F-S-A-R-W-A-Q-E  
 853 M13 3842.6 F-Q-P-H-P-G-L-Q-K-T-L-E-Q-F-H-L-S-S-M-S-S-  
 L-G-G-P-A-A-F-S-A-R-W-A-Q-E  
 854 M14 3858.6 F-Q-P-H-P-G-L-Q-K-T-L-E-Q-F-H-L-S-S-F-S-S-  
 L-G-G-P-A-A-F-S-A-R-W-A-Q-E  
 855 M15 3808.5 F-Q-P-H-P-G-L-Q-K-T-L-E-Q-F-H-L-S-S-P-S-S-  
 L-G-G-P-A-A-F-S-A-R-W-A-Q-E  
 856 M16 3798.5 F-Q-P-H-P-G-L-Q-K-T-L-E-Q-F-H-L-S-S-S-S-S-  
 L-G-G-P-A-A-F-S-A-R-W-A-Q-E  
 857 M17 3812.5 F-Q-P-H-P-G-L-Q-K-T-L-E-Q-F-H-L-S-S-T-S-S-  
 L-G-G-P-A-A-F-S-A-R-W-A-Q-E  
 858 M18 3897.6 F-Q-P-H-P-G-L-Q-K-T-L-E-Q-F-H-L-S-S-W-S-S-  
 L-G-G-P-A-A-F-S-A-R-W-A-Q-E  
 859 M19 3874.6 F-Q-P-H-P-G-L-Q-K-T-L-E-Q-F-H-L-S-S-Y-S-S-  
 L-G-G-P-A-A-F-S-A-R-W-A-Q-E  
 860 M20 3810.5 F-Q-P-H-P-G-L-Q-K-T-L-E-Q-F-H-L-S-S-V-S-S-  
 L-G-G-P-A-A-F-S-A-R-W-A-Q-E  
 861 N 1 3826.6 F-Q-P-H-P-G-L-Q-K-T-L-E-Q-F-H-L-S-S-M-A-S-  
 L-G-G-P-A-A-F-S-A-R-W-A-Q-E  
 862 N 2 3911.7 F-Q-P-H-P-G-L-Q-K-T-L-E-Q-F-H-L-S-S-M-R-S-

L-G-G-P-A-A-F-S-A-R-W-A-Q-E  
 863 N 3 3869.6 F-Q-P-H-P-G-L-Q-K-T-L-E-Q-F-H-L-S-S-M-N-S-  
 L-G-G-P-A-A-F-S-A-R-W-A-Q-E  
 864 N 4 3870.6 F-Q-P-H-P-G-L-Q-K-T-L-E-Q-F-H-L-S-S-M-D-S-  
 L-G-G-P-A-A-F-S-A-R-W-A-Q-E  
 865 N 5 3858.6 F-Q-P-H-P-G-L-Q-K-T-L-E-Q-F-H-L-S-S-M-C-S-  
 L-G-G-P-A-A-F-S-A-R-W-A-Q-E  
 866 N 6 3883.6 F-Q-P-H-P-G-L-Q-K-T-L-E-Q-F-H-L-S-S-M-Q-S-  
 L-G-G-P-A-A-F-S-A-R-W-A-Q-E  
 867 N 7 3884.6 F-Q-P-H-P-G-L-Q-K-T-L-E-Q-F-H-L-S-S-M-E-S-  
 L-G-G-P-A-A-F-S-A-R-W-A-Q-E  
 868 N 8 3812.6 F-Q-P-H-P-G-L-Q-K-T-L-E-Q-F-H-L-S-S-M-G-S-  
 L-G-G-P-A-A-F-S-A-R-W-A-Q-E  
 869 N 9 3892.6 F-Q-P-H-P-G-L-Q-K-T-L-E-Q-F-H-L-S-S-M-H-S-  
 L-G-G-P-A-A-F-S-A-R-W-A-Q-E  
 870 N10 3868.7 F-Q-P-H-P-G-L-Q-K-T-L-E-Q-F-H-L-S-S-M-I-S-  
 L-G-G-P-A-A-F-S-A-R-W-A-Q-E  
 871 N11 3868.7 F-Q-P-H-P-G-L-Q-K-T-L-E-Q-F-H-L-S-S-M-L-S-  
 L-G-G-P-A-A-F-S-A-R-W-A-Q-E  
 872 N12 3883.7 F-Q-P-H-P-G-L-Q-K-T-L-E-Q-F-H-L-S-S-M-K-S-  
 L-G-G-P-A-A-F-S-A-R-W-A-Q-E  
 873 N13 3886.7 F-Q-P-H-P-G-L-Q-K-T-L-E-Q-F-H-L-S-S-M-M-S-  
 L-G-G-P-A-A-F-S-A-R-W-A-Q-E  
 874 N14 3902.7 F-Q-P-H-P-G-L-Q-K-T-L-E-Q-F-H-L-S-S-M-F-S-  
 L-G-G-P-A-A-F-S-A-R-W-A-Q-E  
 875 N15 3852.6 F-Q-P-H-P-G-L-Q-K-T-L-E-Q-F-H-L-S-S-M-P-S-  
 L-G-G-P-A-A-F-S-A-R-W-A-Q-E  
 876 N16 3842.6 F-Q-P-H-P-G-L-Q-K-T-L-E-Q-F-H-L-S-S-M-S-S-  
 L-G-G-P-A-A-F-S-A-R-W-A-Q-E  
 877 N17 3856.6 F-Q-P-H-P-G-L-Q-K-T-L-E-Q-F-H-L-S-S-M-T-S-  
 L-G-G-P-A-A-F-S-A-R-W-A-Q-E  
 878 N18 3941.7 F-Q-P-H-P-G-L-Q-K-T-L-E-Q-F-H-L-S-S-M-W-S-  
 L-G-G-P-A-A-F-S-A-R-W-A-Q-E  
 879 N19 3918.7 F-Q-P-H-P-G-L-Q-K-T-L-E-Q-F-H-L-S-S-M-Y-S-  
 L-G-G-P-A-A-F-S-A-R-W-A-Q-E  
 880 N20 3854.6 F-Q-P-H-P-G-L-Q-K-T-L-E-Q-F-H-L-S-S-M-V-S-  
 L-G-G-P-A-A-F-S-A-R-W-A-Q-E  
 881 0 1 3826.6 F-Q-P-H-P-G-L-Q-K-T-L-E-Q-F-H-L-S-S-M-S-A-  
 L-G-G-P-A-A-F-S-A-R-W-A-Q-E  
 882 0 2 3911.7 F-Q-P-H-P-G-L-Q-K-T-L-E-Q-F-H-L-S-S-M-S-R-  
 L-G-G-P-A-A-F-S-A-R-W-A-Q-E  
 883 0 3 3869.6 F-Q-P-H-P-G-L-Q-K-T-L-E-Q-F-H-L-S-S-M-S-N-  
 L-G-G-P-A-A-F-S-A-R-W-A-Q-E  
 884 0 4 3870.6 F-Q-P-H-P-G-L-Q-K-T-L-E-Q-F-H-L-S-S-M-S-D-  
 L-G-G-P-A-A-F-S-A-R-W-A-Q-E  
 885 0 5 3858.6 F-Q-P-H-P-G-L-Q-K-T-L-E-Q-F-H-L-S-S-M-S-C-  
 L-G-G-P-A-A-F-S-A-R-W-A-Q-E  
 886 0 6 3883.6 F-Q-P-H-P-G-L-Q-K-T-L-E-Q-F-H-L-S-S-M-S-Q-  
 L-G-G-P-A-A-F-S-A-R-W-A-Q-E  
 887 0 7 3884.6 F-Q-P-H-P-G-L-Q-K-T-L-E-Q-F-H-L-S-S-M-S-E-  
 L-G-G-P-A-A-F-S-A-R-W-A-Q-E  
 888 0 8 3812.6 F-Q-P-H-P-G-L-Q-K-T-L-E-Q-F-H-L-S-S-M-S-G-  
 L-G-G-P-A-A-F-S-A-R-W-A-Q-E  
 889 0 9 3892.6 F-Q-P-H-P-G-L-Q-K-T-L-E-Q-F-H-L-S-S-M-S-H-

L-G-G-P-A-A-F-S-A-R-W-A-Q-E  
 890 010 3868.7 F-Q-P-H-P-G-L-Q-K-T-L-E-Q-F-H-L-S-S-M-S-I-  
 L-G-G-P-A-A-F-S-A-R-W-A-Q-E  
 891 011 3868.7 F-Q-P-H-P-G-L-Q-K-T-L-E-Q-F-H-L-S-S-M-S-L-  
 L-G-G-P-A-A-F-S-A-R-W-A-Q-E  
 892 012 3883.7 F-Q-P-H-P-G-L-Q-K-T-L-E-Q-F-H-L-S-S-M-S-K-  
 L-G-G-P-A-A-F-S-A-R-W-A-Q-E  
 893 013 3886.7 F-Q-P-H-P-G-L-Q-K-T-L-E-Q-F-H-L-S-S-M-S-M-  
 L-G-G-P-A-A-F-S-A-R-W-A-Q-E  
 894 014 3902.7 F-Q-P-H-P-G-L-Q-K-T-L-E-Q-F-H-L-S-S-M-S-F-  
 L-G-G-P-A-A-F-S-A-R-W-A-Q-E  
 895 015 3852.6 F-Q-P-H-P-G-L-Q-K-T-L-E-Q-F-H-L-S-S-M-S-P-  
 L-G-G-P-A-A-F-S-A-R-W-A-Q-E  
 896 016 3842.6 F-Q-P-H-P-G-L-Q-K-T-L-E-Q-F-H-L-S-S-M-S-S-  
 L-G-G-P-A-A-F-S-A-R-W-A-Q-E  
 897 017 3856.6 F-Q-P-H-P-G-L-Q-K-T-L-E-Q-F-H-L-S-S-M-S-T-  
 L-G-G-P-A-A-F-S-A-R-W-A-Q-E  
 898 018 3941.7 F-Q-P-H-P-G-L-Q-K-T-L-E-Q-F-H-L-S-S-M-S-W-  
 L-G-G-P-A-A-F-S-A-R-W-A-Q-E  
 899 019 3918.7 F-Q-P-H-P-G-L-Q-K-T-L-E-Q-F-H-L-S-S-M-S-Y-  
 L-G-G-P-A-A-F-S-A-R-W-A-Q-E  
 900 020 3854.6 F-Q-P-H-P-G-L-Q-K-T-L-E-Q-F-H-L-S-S-M-S-V-  
 L-G-G-P-A-A-F-S-A-R-W-A-Q-E  
 901 P 1 3800.5 F-Q-P-H-P-G-L-Q-K-T-L-E-Q-F-H-L-S-S-M-S-S-  
 A-G-G-P-A-A-F-S-A-R-W-A-Q-E  
 902 P 2 3885.6 F-Q-P-H-P-G-L-Q-K-T-L-E-Q-F-H-L-S-S-M-S-S-  
 R-G-G-P-A-A-F-S-A-R-W-A-Q-E  
 903 P 3 3843.5 F-Q-P-H-P-G-L-Q-K-T-L-E-Q-F-H-L-S-S-M-S-S-  
 N-G-G-P-A-A-F-S-A-R-W-A-Q-E  
 904 P 4 3844.5 F-Q-P-H-P-G-L-Q-K-T-L-E-Q-F-H-L-S-S-M-S-S-  
 D-G-G-P-A-A-F-S-A-R-W-A-Q-E  
 905 P 5 3832.5 F-Q-P-H-P-G-L-Q-K-T-L-E-Q-F-H-L-S-S-M-S-S-  
 C-G-G-P-A-A-F-S-A-R-W-A-Q-E  
 906 P 6 3857.5 F-Q-P-H-P-G-L-Q-K-T-L-E-Q-F-H-L-S-S-M-S-S-  
 Q-G-G-P-A-A-F-S-A-R-W-A-Q-E  
 907 P 7 3858.5 F-Q-P-H-P-G-L-Q-K-T-L-E-Q-F-H-L-S-S-M-S-S-  
 E-G-G-P-A-A-F-S-A-R-W-A-Q-E  
 908 P 8 3786.5 F-Q-P-H-P-G-L-Q-K-T-L-E-Q-F-H-L-S-S-M-S-S-  
 G-G-G-P-A-A-F-S-A-R-W-A-Q-E  
 909 P 9 3866.5 F-Q-P-H-P-G-L-Q-K-T-L-E-Q-F-H-L-S-S-M-S-S-  
 H-G-G-P-A-A-F-S-A-R-W-A-Q-E  
 910 P10 3842.6 F-Q-P-H-P-G-L-Q-K-T-L-E-Q-F-H-L-S-S-M-S-S-  
 I-G-G-P-A-A-F-S-A-R-W-A-Q-E  
 911 P11 3842.6 F-Q-P-H-P-G-L-Q-K-T-L-E-Q-F-H-L-S-S-M-S-S-  
 L-G-G-P-A-A-F-S-A-R-W-A-Q-E  
 912 P12 3857.6 F-Q-P-H-P-G-L-Q-K-T-L-E-Q-F-H-L-S-S-M-S-S-  
 K-G-G-P-A-A-F-S-A-R-W-A-Q-E  
 913 P13 3860.6 F-Q-P-H-P-G-L-Q-K-T-L-E-Q-F-H-L-S-S-M-S-S-  
 M-G-G-P-A-A-F-S-A-R-W-A-Q-E  
 914 P14 3876.6 F-Q-P-H-P-G-L-Q-K-T-L-E-Q-F-H-L-S-S-M-S-S-  
 F-G-G-P-A-A-F-S-A-R-W-A-Q-E  
 915 P15 3826.5 F-Q-P-H-P-G-L-Q-K-T-L-E-Q-F-H-L-S-S-M-S-S-  
 P-G-G-P-A-A-F-S-A-R-W-A-Q-E  
 916 P16 3816.5 F-Q-P-H-P-G-L-Q-K-T-L-E-Q-F-H-L-S-S-M-S-S-

S-G-G-P-A-A-F-S-A-R-W-A-Q-E  
 917 P17 3830.5 F-Q-P-H-P-G-L-Q-K-T-L-E-Q-F-H-L-S-S-M-S-S-  
 T-G-G-P-A-A-F-S-A-R-W-A-Q-E  
 918 P18 3915.6 F-Q-P-H-P-G-L-Q-K-T-L-E-Q-F-H-L-S-S-M-S-S-  
 W-G-G-P-A-A-F-S-A-R-W-A-Q-E  
 919 P19 3892.6 F-Q-P-H-P-G-L-Q-K-T-L-E-Q-F-H-L-S-S-M-S-S-  
 Y-G-G-P-A-A-F-S-A-R-W-A-Q-E  
 920 P20 3828.5 F-Q-P-H-P-G-L-Q-K-T-L-E-Q-F-H-L-S-S-M-S-S-  
 V-G-G-P-A-A-F-S-A-R-W-A-Q-E  
 921 Q 1 3856.6 F-Q-P-H-P-G-L-Q-K-T-L-E-Q-F-H-L-S-S-M-S-S-  
 L-A-G-P-A-A-F-S-A-R-W-A-Q-E  
 922 Q 2 3941.7 F-Q-P-H-P-G-L-Q-K-T-L-E-Q-F-H-L-S-S-M-S-S-  
 L-R-G-P-A-A-F-S-A-R-W-A-Q-E  
 923 Q 3 3899.6 F-Q-P-H-P-G-L-Q-K-T-L-E-Q-F-H-L-S-S-M-S-S-  
 L-N-G-P-A-A-F-S-A-R-W-A-Q-E  
 924 Q 4 3900.6 F-Q-P-H-P-G-L-Q-K-T-L-E-Q-F-H-L-S-S-M-S-S-  
 L-D-G-P-A-A-F-S-A-R-W-A-Q-E  
 925 Q 5 3888.6 F-Q-P-H-P-G-L-Q-K-T-L-E-Q-F-H-L-S-S-M-S-S-  
 L-C-G-P-A-A-F-S-A-R-W-A-Q-E  
 926 Q 6 3913.6 F-Q-P-H-P-G-L-Q-K-T-L-E-Q-F-H-L-S-S-M-S-S-  
 L-Q-G-P-A-A-F-S-A-R-W-A-Q-E  
 927 Q 7 3914.6 F-Q-P-H-P-G-L-Q-K-T-L-E-Q-F-H-L-S-S-M-S-S-  
 L-E-G-P-A-A-F-S-A-R-W-A-Q-E  
 928 Q 8 3842.6 F-Q-P-H-P-G-L-Q-K-T-L-E-Q-F-H-L-S-S-M-S-S-  
 L-G-G-P-A-A-F-S-A-R-W-A-Q-E  
 929 Q 9 3922.6 F-Q-P-H-P-G-L-Q-K-T-L-E-Q-F-H-L-S-S-M-S-S-  
 L-H-G-P-A-A-F-S-A-R-W-A-Q-E  
 930 Q10 3898.7 F-Q-P-H-P-G-L-Q-K-T-L-E-Q-F-H-L-S-S-M-S-S-  
 L-I-G-P-A-A-F-S-A-R-W-A-Q-E  
 931 Q11 3898.7 F-Q-P-H-P-G-L-Q-K-T-L-E-Q-F-H-L-S-S-M-S-S-  
 L-L-G-P-A-A-F-S-A-R-W-A-Q-E  
 932 Q12 3913.7 F-Q-P-H-P-G-L-Q-K-T-L-E-Q-F-H-L-S-S-M-S-S-  
 L-K-G-P-A-A-F-S-A-R-W-A-Q-E  
 933 Q13 3916.7 F-Q-P-H-P-G-L-Q-K-T-L-E-Q-F-H-L-S-S-M-S-S-  
 L-M-G-P-A-A-F-S-A-R-W-A-Q-E  
 934 Q14 3932.7 F-Q-P-H-P-G-L-Q-K-T-L-E-Q-F-H-L-S-S-M-S-S-  
 L-F-G-P-A-A-F-S-A-R-W-A-Q-E  
 935 Q15 3882.6 F-Q-P-H-P-G-L-Q-K-T-L-E-Q-F-H-L-S-S-M-S-S-  
 L-P-G-P-A-A-F-S-A-R-W-A-Q-E  
 936 Q16 3872.6 F-Q-P-H-P-G-L-Q-K-T-L-E-Q-F-H-L-S-S-M-S-S-  
 L-S-G-P-A-A-F-S-A-R-W-A-Q-E  
 937 Q17 3886.6 F-Q-P-H-P-G-L-Q-K-T-L-E-Q-F-H-L-S-S-M-S-S-  
 L-T-G-P-A-A-F-S-A-R-W-A-Q-E  
 938 Q18 3971.7 F-Q-P-H-P-G-L-Q-K-T-L-E-Q-F-H-L-S-S-M-S-S-  
 L-W-G-P-A-A-F-S-A-R-W-A-Q-E  
 939 Q19 3948.7 F-Q-P-H-P-G-L-Q-K-T-L-E-Q-F-H-L-S-S-M-S-S-  
 L-Y-G-P-A-A-F-S-A-R-W-A-Q-E  
 940 Q20 3884.6 F-Q-P-H-P-G-L-Q-K-T-L-E-Q-F-H-L-S-S-M-S-S-  
 L-V-G-P-A-A-F-S-A-R-W-A-Q-E  
 941 R 1 3856.6 F-Q-P-H-P-G-L-Q-K-T-L-E-Q-F-H-L-S-S-M-S-S-  
 L-G-A-P-A-A-F-S-A-R-W-A-Q-E  
 942 R 2 3941.7 F-Q-P-H-P-G-L-Q-K-T-L-E-Q-F-H-L-S-S-M-S-S-  
 L-G-R-P-A-A-F-S-A-R-W-A-Q-E  
 943 R 3 3899.6 F-Q-P-H-P-G-L-Q-K-T-L-E-Q-F-H-L-S-S-M-S-S-

L-G-N-P-A-A-F-S-A-R-W-A-Q-E  
 944 R 4 3900.6 F-Q-P-H-P-G-L-Q-K-T-L-E-Q-F-H-L-S-S-M-S-S-  
 L-G-D-P-A-A-F-S-A-R-W-A-Q-E  
 945 R 5 3888.6 F-Q-P-H-P-G-L-Q-K-T-L-E-Q-F-H-L-S-S-M-S-S-  
 L-G-C-P-A-A-F-S-A-R-W-A-Q-E  
 946 R 6 3913.6 F-Q-P-H-P-G-L-Q-K-T-L-E-Q-F-H-L-S-S-M-S-S-  
 L-G-Q-P-A-A-F-S-A-R-W-A-Q-E  
 947 R 7 3914.6 F-Q-P-H-P-G-L-Q-K-T-L-E-Q-F-H-L-S-S-M-S-S-  
 L-G-E-P-A-A-F-S-A-R-W-A-Q-E  
 948 R 8 3842.6 F-Q-P-H-P-G-L-Q-K-T-L-E-Q-F-H-L-S-S-M-S-S-  
 L-G-G-P-A-A-F-S-A-R-W-A-Q-E  
 949 R 9 3922.6 F-Q-P-H-P-G-L-Q-K-T-L-E-Q-F-H-L-S-S-M-S-S-  
 L-G-H-P-A-A-F-S-A-R-W-A-Q-E  
 950 R10 3898.7 F-Q-P-H-P-G-L-Q-K-T-L-E-Q-F-H-L-S-S-M-S-S-  
 L-G-I-P-A-A-F-S-A-R-W-A-Q-E  
 951 R11 3898.7 F-Q-P-H-P-G-L-Q-K-T-L-E-Q-F-H-L-S-S-M-S-S-  
 L-G-L-P-A-A-F-S-A-R-W-A-Q-E  
 952 R12 3913.7 F-Q-P-H-P-G-L-Q-K-T-L-E-Q-F-H-L-S-S-M-S-S-  
 L-G-K-P-A-A-F-S-A-R-W-A-Q-E  
 953 R13 3916.7 F-Q-P-H-P-G-L-Q-K-T-L-E-Q-F-H-L-S-S-M-S-S-  
 L-G-M-P-A-A-F-S-A-R-W-A-Q-E  
 954 R14 3932.7 F-Q-P-H-P-G-L-Q-K-T-L-E-Q-F-H-L-S-S-M-S-S-  
 L-G-F-P-A-A-F-S-A-R-W-A-Q-E  
 955 R15 3882.6 F-Q-P-H-P-G-L-Q-K-T-L-E-Q-F-H-L-S-S-M-S-S-  
 L-G-P-P-A-A-F-S-A-R-W-A-Q-E  
 956 R16 3872.6 F-Q-P-H-P-G-L-Q-K-T-L-E-Q-F-H-L-S-S-M-S-S-  
 L-G-S-P-A-A-F-S-A-R-W-A-Q-E  
 957 R17 3886.6 F-Q-P-H-P-G-L-Q-K-T-L-E-Q-F-H-L-S-S-M-S-S-  
 L-G-T-P-A-A-F-S-A-R-W-A-Q-E  
 958 R18 3971.7 F-Q-P-H-P-G-L-Q-K-T-L-E-Q-F-H-L-S-S-M-S-S-  
 L-G-W-P-A-A-F-S-A-R-W-A-Q-E  
 959 R19 3948.7 F-Q-P-H-P-G-L-Q-K-T-L-E-Q-F-H-L-S-S-M-S-S-  
 L-G-Y-P-A-A-F-S-A-R-W-A-Q-E  
 960 R20 3884.6 F-Q-P-H-P-G-L-Q-K-T-L-E-Q-F-H-L-S-S-M-S-S-  
 L-G-V-P-A-A-F-S-A-R-W-A-Q-E  
 961 S 1 3816.6 F-Q-P-H-P-G-L-Q-K-T-L-E-Q-F-H-L-S-S-M-S-S-  
 L-G-G-A-A-A-F-S-A-R-W-A-Q-E  
 962 S 2 3901.7 F-Q-P-H-P-G-L-Q-K-T-L-E-Q-F-H-L-S-S-M-S-S-  
 L-G-G-R-A-A-F-S-A-R-W-A-Q-E  
 963 S 3 3859.6 F-Q-P-H-P-G-L-Q-K-T-L-E-Q-F-H-L-S-S-M-S-S-  
 L-G-G-N-A-A-F-S-A-R-W-A-Q-E  
 964 S 4 3860.6 F-Q-P-H-P-G-L-Q-K-T-L-E-Q-F-H-L-S-S-M-S-S-  
 L-G-G-D-A-A-F-S-A-R-W-A-Q-E  
 965 S 5 3848.6 F-Q-P-H-P-G-L-Q-K-T-L-E-Q-F-H-L-S-S-M-S-S-  
 L-G-G-C-A-A-F-S-A-R-W-A-Q-E  
 966 S 6 3873.6 F-Q-P-H-P-G-L-Q-K-T-L-E-Q-F-H-L-S-S-M-S-S-  
 L-G-G-Q-A-A-F-S-A-R-W-A-Q-E  
 967 S 7 3874.6 F-Q-P-H-P-G-L-Q-K-T-L-E-Q-F-H-L-S-S-M-S-S-  
 L-G-G-E-A-A-F-S-A-R-W-A-Q-E  
 968 S 8 3802.6 F-Q-P-H-P-G-L-Q-K-T-L-E-Q-F-H-L-S-S-M-S-S-  
 L-G-G-G-A-A-F-S-A-R-W-A-Q-E  
 969 S 9 3882.6 F-Q-P-H-P-G-L-Q-K-T-L-E-Q-F-H-L-S-S-M-S-S-  
 L-G-G-H-A-A-F-S-A-R-W-A-Q-E  
 970 S10 3858.7 F-Q-P-H-P-G-L-Q-K-T-L-E-Q-F-H-L-S-S-M-S-S-

|     |     |        |                                                                       |
|-----|-----|--------|-----------------------------------------------------------------------|
|     |     |        | L-G-G-I-A-A-F-S-A-R-W-A-Q-E                                           |
| 971 | S11 | 3858.7 | F-Q-P-H-P-G-L-Q-K-T-L-E-Q-F-H-L-S-S-M-S-S-L-G-G-L-A-A-F-S-A-R-W-A-Q-E |
| 972 | S12 | 3873.7 | F-Q-P-H-P-G-L-Q-K-T-L-E-Q-F-H-L-S-S-M-S-S-L-G-G-K-A-A-F-S-A-R-W-A-Q-E |
| 973 | S13 | 3876.7 | F-Q-P-H-P-G-L-Q-K-T-L-E-Q-F-H-L-S-S-M-S-S-L-G-G-M-A-A-F-S-A-R-W-A-Q-E |
| 974 | S14 | 3892.7 | F-Q-P-H-P-G-L-Q-K-T-L-E-Q-F-H-L-S-S-M-S-S-L-G-G-F-A-A-F-S-A-R-W-A-Q-E |
| 975 | S15 | 3842.6 | F-Q-P-H-P-G-L-Q-K-T-L-E-Q-F-H-L-S-S-M-S-S-L-G-G-P-A-A-F-S-A-R-W-A-Q-E |
| 976 | S16 | 3832.6 | F-Q-P-H-P-G-L-Q-K-T-L-E-Q-F-H-L-S-S-M-S-S-L-G-G-S-A-A-F-S-A-R-W-A-Q-E |
| 977 | S17 | 3846.6 | F-Q-P-H-P-G-L-Q-K-T-L-E-Q-F-H-L-S-S-M-S-S-L-G-G-T-A-A-F-S-A-R-W-A-Q-E |
| 978 | S18 | 3931.7 | F-Q-P-H-P-G-L-Q-K-T-L-E-Q-F-H-L-S-S-M-S-S-L-G-G-W-A-A-F-S-A-R-W-A-Q-E |
| 979 | S19 | 3908.7 | F-Q-P-H-P-G-L-Q-K-T-L-E-Q-F-H-L-S-S-M-S-S-L-G-G-Y-A-A-F-S-A-R-W-A-Q-E |
| 980 | S20 | 3844.6 | F-Q-P-H-P-G-L-Q-K-T-L-E-Q-F-H-L-S-S-M-S-S-L-G-G-V-A-A-F-S-A-R-W-A-Q-E |
| 981 | T 1 | 0      |                                                                       |
| 982 | T 2 | 0      |                                                                       |
| 983 | T 3 | 0      |                                                                       |
| 984 | T 4 | 0      |                                                                       |
| 985 | T 5 | 0      |                                                                       |
| 986 | T 6 | 0      |                                                                       |
| 987 | T 7 | 0      |                                                                       |
| 988 | T 8 | 0      |                                                                       |
| 989 | T 9 | 0      |                                                                       |
| 990 | T10 | 0      |                                                                       |
| 991 | T11 | 0      |                                                                       |
| 992 | T12 | 0      |                                                                       |
| 993 | T13 | 0      |                                                                       |
| 994 | T14 | 0      |                                                                       |
| 995 | T15 | 0      |                                                                       |
| 996 | T16 | 0      |                                                                       |
| 997 | T17 | 0      |                                                                       |

|      |     |   |
|------|-----|---|
| 998  | T18 | 0 |
| 999  | T19 | 0 |
| 1000 | T20 | 0 |
| 1001 | U 1 | 0 |
| 1002 | U 2 | 0 |
| 1003 | U 3 | 0 |
| 1004 | U 4 | 0 |
| 1005 | U 5 | 0 |
| 1006 | U 6 | 0 |
| 1007 | U 7 | 0 |
| 1008 | U 8 | 0 |
| 1009 | U 9 | 0 |
| 1010 | U10 | 0 |
| 1011 | U11 | 0 |
| 1012 | U12 | 0 |
| 1013 | U13 | 0 |
| 1014 | U14 | 0 |
| 1015 | U15 | 0 |
| 1016 | U16 | 0 |
| 1017 | U17 | 0 |
| 1018 | U18 | 0 |
| 1019 | U19 | 0 |
| 1020 | U20 | 0 |

|      |     |        |                                                                       |
|------|-----|--------|-----------------------------------------------------------------------|
| 1021 | V 1 | 3842.6 | F-Q-P-H-P-G-L-Q-K-T-L-E-Q-F-H-L-S-S-M-S-S-L-G-G-P-A-A-F-S-A-R-W-A-Q-E |
| 1022 | V 2 | 3842.6 | F-Q-P-H-P-G-L-Q-K-T-L-E-Q-F-H-L-S-S-M-S-S-L-G-G-P-A-A-F-S-A-R-W-A-Q-E |
| 1023 | V 3 | 3842.6 | F-Q-P-H-P-G-L-Q-K-T-L-E-Q-F-H-L-S-S-M-S-S-L-G-G-P-A-A-F-S-A-R-W-A-Q-E |
| 1024 | V 4 | 3842.6 | F-Q-P-H-P-G-L-Q-K-T-L-E-Q-F-H-L-S-S-M-S-S-                            |

L-G-G-P-A-A-F-S-A-R-W-A-Q-E  
 1025 V 5 3842.6 F-Q-P-H-P-G-L-Q-K-T-L-E-Q-F-H-L-S-S-M-S-S-  
 L-G-G-P-A-A-F-S-A-R-W-A-Q-E  
 1026 V 6 0  
  
 1027 V 7 0  
  
 1028 V 8 3842.6 F-Q-P-H-P-G-L-Q-K-T-L-E-Q-F-H-L-S-S-M-S-S-  
 L-G-G-P-A-A-F-S-A-R-W-A-Q-E  
 1029 V 9 3842.6 F-Q-P-H-P-G-L-Q-K-T-L-E-Q-F-H-L-S-S-M-S-S-  
 L-G-G-P-A-A-F-S-A-R-W-A-Q-E  
 1030 V10 3842.6 F-Q-P-H-P-G-L-Q-K-T-L-E-Q-F-H-L-S-S-M-S-S-  
 L-G-G-P-A-A-F-S-A-R-W-A-Q-E  
 1031 V11 3842.6 F-Q-P-H-P-G-L-Q-K-T-L-E-Q-F-H-L-S-S-M-S-S-  
 L-G-G-P-A-A-F-S-A-R-W-A-Q-E  
 1032 V12 3842.6 F-Q-P-H-P-G-L-Q-K-T-L-E-Q-F-H-L-S-S-M-S-S-  
 L-G-G-P-A-A-F-S-A-R-W-A-Q-E  
 1033 V13 0  
  
 1034 V14 0  
  
 1035 V15 3842.6 F-Q-P-H-P-G-L-Q-K-T-L-E-Q-F-H-L-S-S-M-S-S-  
 L-G-G-P-A-A-F-S-A-R-W-A-Q-E  
 1036 V16 3842.6 F-Q-P-H-P-G-L-Q-K-T-L-E-Q-F-H-L-S-S-M-S-S-  
 L-G-G-P-A-A-F-S-A-R-W-A-Q-E  
 1037 V17 3842.6 F-Q-P-H-P-G-L-Q-K-T-L-E-Q-F-H-L-S-S-M-S-S-  
 L-G-G-P-A-A-F-S-A-R-W-A-Q-E  
 1038 V18 3842.6 F-Q-P-H-P-G-L-Q-K-T-L-E-Q-F-H-L-S-S-M-S-S-  
 L-G-G-P-A-A-F-S-A-R-W-A-Q-E  
 1039 V19 3842.6 F-Q-P-H-P-G-L-Q-K-T-L-E-Q-F-H-L-S-S-M-S-S-  
 L-G-G-P-A-A-F-S-A-R-W-A-Q-E  
 1040 V20 0  
  
 1041 W 1 3842.6 F-Q-P-H-P-G-L-Q-K-T-L-E-Q-F-H-L-S-S-M-S-S-  
 L-G-G-P-A-A-F-S-A-R-W-A-Q-E  
 1042 W 2 3842.6 F-Q-P-H-P-G-L-Q-K-T-L-E-Q-F-H-L-S-S-M-S-S-  
 L-G-G-P-A-A-F-S-A-R-W-A-Q-E  
 1043 W 3 3842.6 F-Q-P-H-P-G-L-Q-K-T-L-E-Q-F-H-L-S-S-M-S-S-  
 L-G-G-P-A-A-F-S-A-R-W-A-Q-E  
 1044 W 4 3842.6 F-Q-P-H-P-G-L-Q-K-T-L-E-Q-F-H-L-S-S-M-S-S-  
 L-G-G-P-A-A-F-S-A-R-W-A-Q-E  
 1045 W 5 3842.6 F-Q-P-H-P-G-L-Q-K-T-L-E-Q-F-H-L-S-S-M-S-S-  
 L-G-G-P-A-A-F-S-A-R-W-A-Q-E  
 1046 W 6 0  
  
 1047 W 7 0  
  
 1048 W 8 3842.6 F-Q-P-H-P-G-L-Q-K-T-L-E-Q-F-H-L-S-S-M-S-S-  
 L-G-G-P-A-A-F-S-A-R-W-A-Q-E  
 1049 W 9 3842.6 F-Q-P-H-P-G-L-Q-K-T-L-E-Q-F-H-L-S-S-M-S-S-  
 L-G-G-P-A-A-F-S-A-R-W-A-Q-E  
 1050 W10 3842.6 F-Q-P-H-P-G-L-Q-K-T-L-E-Q-F-H-L-S-S-M-S-S-  
 L-G-G-P-A-A-F-S-A-R-W-A-Q-E  
 1051 W11 3842.6 F-Q-P-H-P-G-L-Q-K-T-L-E-Q-F-H-L-S-S-M-S-S-

L-G-G-P-A-A-F-S-A-R-W-A-Q-E  
 1052 W12 3842.6 F-Q-P-H-P-G-L-Q-K-T-L-E-Q-F-H-L-S-S-M-S-S-  
 L-G-G-P-A-A-F-S-A-R-W-A-Q-E  
 1053 W13 0  
  
 1054 W14 0  
  
 1055 W15 3842.6 F-Q-P-H-P-G-L-Q-K-T-L-E-Q-F-H-L-S-S-M-S-S-  
 L-G-G-P-A-A-F-S-A-R-W-A-Q-E  
 1056 W16 3842.6 F-Q-P-H-P-G-L-Q-K-T-L-E-Q-F-H-L-S-S-M-S-S-  
 L-G-G-P-A-A-F-S-A-R-W-A-Q-E  
 1057 W17 3842.6 F-Q-P-H-P-G-L-Q-K-T-L-E-Q-F-H-L-S-S-M-S-S-  
 L-G-G-P-A-A-F-S-A-R-W-A-Q-E  
 1058 W18 3842.6 F-Q-P-H-P-G-L-Q-K-T-L-E-Q-F-H-L-S-S-M-S-S-  
 L-G-G-P-A-A-F-S-A-R-W-A-Q-E  
 1059 W19 3842.6 F-Q-P-H-P-G-L-Q-K-T-L-E-Q-F-H-L-S-S-M-S-S-  
 L-G-G-P-A-A-F-S-A-R-W-A-Q-E  
 1060 W20 0  
  
 1061 X 1 3842.6 F-Q-P-H-P-G-L-Q-K-T-L-E-Q-F-H-L-S-S-M-S-S-  
 L-G-G-P-A-A-F-S-A-R-W-A-Q-E  
 1062 X 2 3842.6 F-Q-P-H-P-G-L-Q-K-T-L-E-Q-F-H-L-S-S-M-S-S-  
 L-G-G-P-A-A-F-S-A-R-W-A-Q-E  
 1063 X 3 3842.6 F-Q-P-H-P-G-L-Q-K-T-L-E-Q-F-H-L-S-S-M-S-S-  
 L-G-G-P-A-A-F-S-A-R-W-A-Q-E  
 1064 X 4 3842.6 F-Q-P-H-P-G-L-Q-K-T-L-E-Q-F-H-L-S-S-M-S-S-  
 L-G-G-P-A-A-F-S-A-R-W-A-Q-E  
 1065 X 5 3842.6 F-Q-P-H-P-G-L-Q-K-T-L-E-Q-F-H-L-S-S-M-S-S-  
 L-G-G-P-A-A-F-S-A-R-W-A-Q-E  
 1066 X 6 0  
  
 1067 X 7 0  
  
 1068 X 8 3842.6 F-Q-P-H-P-G-L-Q-K-T-L-E-Q-F-H-L-S-S-M-S-S-  
 L-G-G-P-A-A-F-S-A-R-W-A-Q-E  
 1069 X 9 3842.6 F-Q-P-H-P-G-L-Q-K-T-L-E-Q-F-H-L-S-S-M-S-S-  
 L-G-G-P-A-A-F-S-A-R-W-A-Q-E  
 1070 X10 3842.6 F-Q-P-H-P-G-L-Q-K-T-L-E-Q-F-H-L-S-S-M-S-S-  
 L-G-G-P-A-A-F-S-A-R-W-A-Q-E  
 1071 X11 3842.6 F-Q-P-H-P-G-L-Q-K-T-L-E-Q-F-H-L-S-S-M-S-S-  
 L-G-G-P-A-A-F-S-A-R-W-A-Q-E  
 1072 X12 3842.6 F-Q-P-H-P-G-L-Q-K-T-L-E-Q-F-H-L-S-S-M-S-S-  
 L-G-G-P-A-A-F-S-A-R-W-A-Q-E  
 1073 X13 0  
  
 1074 X14 0  
  
 1075 X15 3842.6 F-Q-P-H-P-G-L-Q-K-T-L-E-Q-F-H-L-S-S-M-S-S-  
 L-G-G-P-A-A-F-S-A-R-W-A-Q-E  
 1076 X16 3842.6 F-Q-P-H-P-G-L-Q-K-T-L-E-Q-F-H-L-S-S-M-S-S-  
 L-G-G-P-A-A-F-S-A-R-W-A-Q-E  
 1077 X17 3842.6 F-Q-P-H-P-G-L-Q-K-T-L-E-Q-F-H-L-S-S-M-S-S-  
 L-G-G-P-A-A-F-S-A-R-W-A-Q-E  
 1078 X18 3842.6 F-Q-P-H-P-G-L-Q-K-T-L-E-Q-F-H-L-S-S-M-S-S-

L-G-G-P-A-A-F-S-A-R-W-A-Q-E  
 1079 X19 3842.6 F-Q-P-H-P-G-L-Q-K-T-L-E-Q-F-H-L-S-S-M-S-S-  
 L-G-G-P-A-A-F-S-A-R-W-A-Q-E  
 1080 X20 0  
  
 1081 Y 1 3842.6 F-Q-P-H-P-G-L-Q-K-T-L-E-Q-F-H-L-S-S-M-S-S-  
 L-G-G-P-A-A-F-S-A-R-W-A-Q-E  
 1082 Y 2 3842.6 F-Q-P-H-P-G-L-Q-K-T-L-E-Q-F-H-L-S-S-M-S-S-  
 L-G-G-P-A-A-F-S-A-R-W-A-Q-E  
 1083 Y 3 3842.6 F-Q-P-H-P-G-L-Q-K-T-L-E-Q-F-H-L-S-S-M-S-S-  
 L-G-G-P-A-A-F-S-A-R-W-A-Q-E  
 1084 Y 4 3842.6 F-Q-P-H-P-G-L-Q-K-T-L-E-Q-F-H-L-S-S-M-S-S-  
 L-G-G-P-A-A-F-S-A-R-W-A-Q-E  
 1085 Y 5 3842.6 F-Q-P-H-P-G-L-Q-K-T-L-E-Q-F-H-L-S-S-M-S-S-  
 L-G-G-P-A-A-F-S-A-R-W-A-Q-E  
 1086 Y 6 0  
  
 1087 Y 7 0  
  
 1088 Y 8 3842.6 F-Q-P-H-P-G-L-Q-K-T-L-E-Q-F-H-L-S-S-M-S-S-  
 L-G-G-P-A-A-F-S-A-R-W-A-Q-E  
 1089 Y 9 3842.6 F-Q-P-H-P-G-L-Q-K-T-L-E-Q-F-H-L-S-S-M-S-S-  
 L-G-G-P-A-A-F-S-A-R-W-A-Q-E  
 1090 Y10 3842.6 F-Q-P-H-P-G-L-Q-K-T-L-E-Q-F-H-L-S-S-M-S-S-  
 L-G-G-P-A-A-F-S-A-R-W-A-Q-E  
 1091 Y11 3842.6 F-Q-P-H-P-G-L-Q-K-T-L-E-Q-F-H-L-S-S-M-S-S-  
 L-G-G-P-A-A-F-S-A-R-W-A-Q-E  
 1092 Y12 3842.6 F-Q-P-H-P-G-L-Q-K-T-L-E-Q-F-H-L-S-S-M-S-S-  
 L-G-G-P-A-A-F-S-A-R-W-A-Q-E  
 1093 Y13 0  
  
 1094 Y14 0  
  
 1095 Y15 3842.6 F-Q-P-H-P-G-L-Q-K-T-L-E-Q-F-H-L-S-S-M-S-S-  
 L-G-G-P-A-A-F-S-A-R-W-A-Q-E  
 1096 Y16 3842.6 F-Q-P-H-P-G-L-Q-K-T-L-E-Q-F-H-L-S-S-M-S-S-  
 L-G-G-P-A-A-F-S-A-R-W-A-Q-E  
 1097 Y17 3842.6 F-Q-P-H-P-G-L-Q-K-T-L-E-Q-F-H-L-S-S-M-S-S-  
 L-G-G-P-A-A-F-S-A-R-W-A-Q-E  
 1098 Y18 3842.6 F-Q-P-H-P-G-L-Q-K-T-L-E-Q-F-H-L-S-S-M-S-S-  
 L-G-G-P-A-A-F-S-A-R-W-A-Q-E  
 1099 Y19 3842.6 F-Q-P-H-P-G-L-Q-K-T-L-E-Q-F-H-L-S-S-M-S-S-  
 L-G-G-P-A-A-F-S-A-R-W-A-Q-E  
 1100 Y20 0  
  
 1101 Z 1 0  
  
 1102 Z 2 0  
  
 1103 Z 3 0  
  
 1104 Z 4 0  
  
 1105 Z 5 0

[illegible]

F-S-A-R-W-A-Q-E-A-Y-K-K-E-S  
1133 [13 0

1134 [14 0

1135 [15 3516.3  
F-S-A-R-W-A-Q-E-A-Y-K-K-E-S

1136 [16 3516.3  
F-S-A-R-W-A-Q-E-A-Y-K-K-E-S

1137 [17 3516.3  
F-S-A-R-W-A-Q-E-A-Y-K-K-E-S

1138 [18 3516.3  
F-S-A-R-W-A-Q-E-A-Y-K-K-E-S

1139 [19 3516.3  
F-S-A-R-W-A-Q-E-A-Y-K-K-E-S

1140 [20 0

1141 \ 1 3516.3  
F-S-A-R-W-A-Q-E-A-Y-K-K-E-S

1142 \ 2 3516.3  
F-S-A-R-W-A-Q-E-A-Y-K-K-E-S

1143 \ 3 3516.3  
F-S-A-R-W-A-Q-E-A-Y-K-K-E-S

1144 \ 4 3516.3  
F-S-A-R-W-A-Q-E-A-Y-K-K-E-S

1145 \ 5 3516.3  
F-S-A-R-W-A-Q-E-A-Y-K-K-E-S

1146 \ 6 0

1147 \ 7 0

1148 \ 8 3516.3  
F-S-A-R-W-A-Q-E-A-Y-K-K-E-S

1149 \ 9 3516.3  
F-S-A-R-W-A-Q-E-A-Y-K-K-E-S

1150 \10 3516.3  
F-S-A-R-W-A-Q-E-A-Y-K-K-E-S

1151 \11 3516.3  
F-S-A-R-W-A-Q-E-A-Y-K-K-E-S

1152 \12 3516.3  
F-S-A-R-W-A-Q-E-A-Y-K-K-E-S

1153 \13 0

1154 \14 0

1155 \15 3516.3  
F-S-A-R-W-A-Q-E-A-Y-K-K-E-S

1156 \16 3516.3  
F-S-A-R-W-A-Q-E-A-Y-K-K-E-S

1157 \17 3516.3  
F-S-A-R-W-A-Q-E-A-Y-K-K-E-S

1158 \18 3516.3  
F-S-A-R-W-A-Q-E-A-Y-K-K-E-S

1159 \19 3516.3

T-L-E-Q-F-H-L-S-S-M-S-S-L-G-G-P-A-A-

F-S-A-R-W-A-Q-E-A-Y-K-K-E-S  
1160     \20     0

1161     ] 1     3516.3  
F-S-A-R-W-A-Q-E-A-Y-K-K-E-S  
1162     ] 2     3516.3  
F-S-A-R-W-A-Q-E-A-Y-K-K-E-S  
1163     ] 3     3516.3  
F-S-A-R-W-A-Q-E-A-Y-K-K-E-S  
1164     ] 4     3516.3  
F-S-A-R-W-A-Q-E-A-Y-K-K-E-S  
1165     ] 5     3516.3  
F-S-A-R-W-A-Q-E-A-Y-K-K-E-S  
1166     ] 6     0

1167     ] 7     0

1168     ] 8     3516.3  
F-S-A-R-W-A-Q-E-A-Y-K-K-E-S  
1169     ] 9     3516.3  
F-S-A-R-W-A-Q-E-A-Y-K-K-E-S  
1170     ]10     3516.3  
F-S-A-R-W-A-Q-E-A-Y-K-K-E-S  
1171     ]11     3516.3  
F-S-A-R-W-A-Q-E-A-Y-K-K-E-S  
1172     ]12     3516.3  
F-S-A-R-W-A-Q-E-A-Y-K-K-E-S  
1173     ]13     0

1174     ]14     0

1175     ]15     3516.3  
F-S-A-R-W-A-Q-E-A-Y-K-K-E-S  
1176     ]16     3516.3  
F-S-A-R-W-A-Q-E-A-Y-K-K-E-S  
1177     ]17     3516.3  
F-S-A-R-W-A-Q-E-A-Y-K-K-E-S  
1178     ]18     3516.3  
F-S-A-R-W-A-Q-E-A-Y-K-K-E-S  
1179     ]19     3516.3  
F-S-A-R-W-A-Q-E-A-Y-K-K-E-S  
1180     ]20     0

1181     ^ 1     3516.3  
F-S-A-R-W-A-Q-E-A-Y-K-K-E-S  
1182     ^ 2     3516.3  
F-S-A-R-W-A-Q-E-A-Y-K-K-E-S  
1183     ^ 3     3516.3  
F-S-A-R-W-A-Q-E-A-Y-K-K-E-S  
1184     ^ 4     3516.3  
F-S-A-R-W-A-Q-E-A-Y-K-K-E-S  
1185     ^ 5     3516.3  
F-S-A-R-W-A-Q-E-A-Y-K-K-E-S  
1186     ^ 6     0

T-L-E-Q-F-H-L-S-S-M-S-S-L-G-G-P-A-A-

1187      ^ 7      0

1188      ^ 8      3516.3  
F-S-A-R-W-A-Q-E-A-Y-K-K-E-S

1189      ^ 9      3516.3  
F-S-A-R-W-A-Q-E-A-Y-K-K-E-S

1190      ^10      3516.3  
F-S-A-R-W-A-Q-E-A-Y-K-K-E-S

1191      ^11      3516.3  
F-S-A-R-W-A-Q-E-A-Y-K-K-E-S

1192      ^12      3516.3  
F-S-A-R-W-A-Q-E-A-Y-K-K-E-S

1193      ^13      0

1194      ^14      0

1195      ^15      3516.3  
F-S-A-R-W-A-Q-E-A-Y-K-K-E-S

1196      ^16      3516.3  
F-S-A-R-W-A-Q-E-A-Y-K-K-E-S

1197      ^17      3516.3  
F-S-A-R-W-A-Q-E-A-Y-K-K-E-S

1198      ^18      3516.3  
F-S-A-R-W-A-Q-E-A-Y-K-K-E-S

1199      ^19      3516.3  
F-S-A-R-W-A-Q-E-A-Y-K-K-E-S

T-L-E-Q-F-H-L-S-S-M-S-S-L-G-G-P-A-A-

Array 1

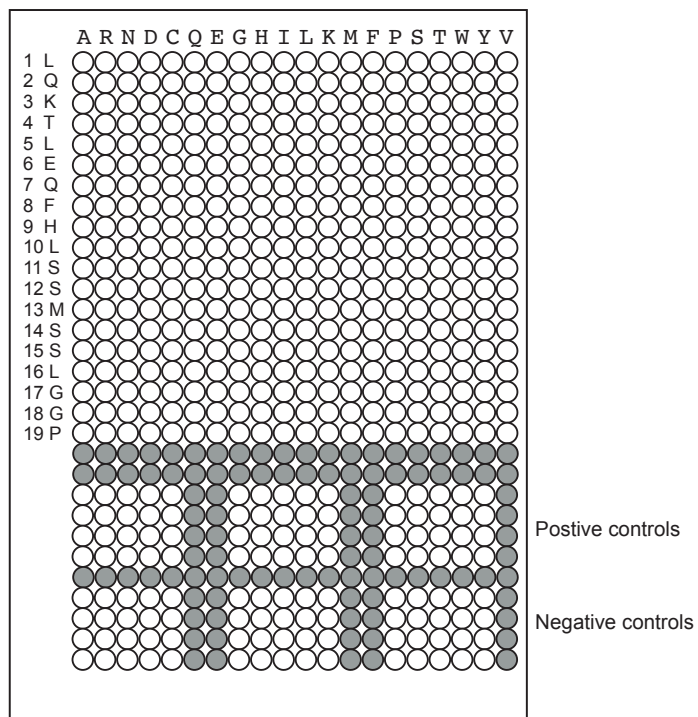

Array 2

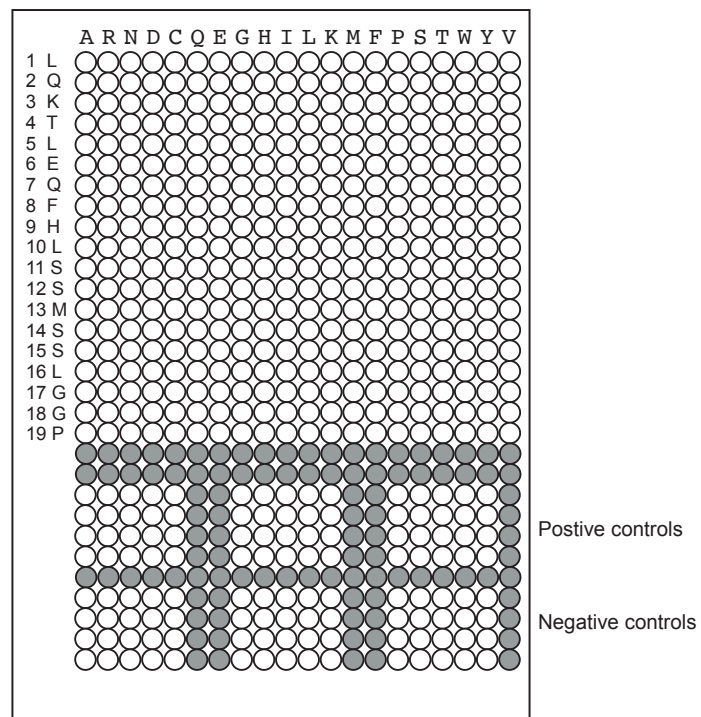

Supplement: supp [file elife-63545-supp-v1.zip › elife_poa_e63545_Figure_4_source_data_1.pdf]
