# Supplementary material for: Mutations in SKI in Shprintzen–Goldberg syndrome lead to attenuated TGF-β responses through SKI stabilization
Source: eLife journal article supplement (doi:10.7554/elife.63545), 2021-01-08
Supplement: supp [file elife-63545-supp-v1.zip]

Archive with 24 entries (24 files):
- elife_poa_e63545_Figure_1_figure_supplement_1.pdf
- elife_poa_e63545_Figure_2_figure_supplement_1.pdf
- elife_poa_e63545_Figure_4_figure_supplement_1.pdf
- elife_poa_e63545_Figure_5_figure_supplement_1.pdf
- elife_poa_e63545_Figure_6_figure_supplement_1.pdf
- elife_poa_e63545_Figure_7_figure_supplement_1.pdf
- elife_poa_e63545_Figure_7_figure_supplement_2.pdf
- elife_poa_e63545_Video_1.mp4
- elife_poa_e63545_Transparent_Reporting_File.docx
- elife_poa_e63545_Figure_1_source_data_1.docx
- elife_poa_e63545_Figure_1_figure_supplement_1_source_data_1.xlsx
- elife_poa_e63545_Figure_1_figure_supplement_1_source_data_2.xlsx
- elife_poa_e63545_Figure_1_figure_supplement_1_source_data_3.xlsx
- elife_poa_e63545_Figure_2_source_data_1.xlsx
- elife_poa_e63545_Figure_2_source_data_2.xlsx
- elife_poa_e63545_Figure_2_figure_supplement_1_source_data_1.xlsx
- elife_poa_e63545_Figure_2_figure_supplement_1_source_data_2.xlsx
- elife_poa_e63545_Figure_4_source_data_1.pdf
- elife_poa_e63545_Figure_4_source_data_2.xlsx
- elife_poa_e63545_Figure_5_source_data_1.pdf
- elife_poa_e63545_Figure_6_source_data_1.xlsx
- elife_poa_e63545_Figure_6_source_data_2.xlsx
- elife_poa_e63545_Figure_7_source_data_1.xlsx
- elife_poa_e63545_Figure_7_figure_supplement_2_source_data_1.xlsx
