# Supplementary material for: Mutations in SKI in Shprintzen–Goldberg syndrome lead to attenuated TGF-β responses through SKI stabilization
Source: eLife journal article supplement (doi:10.7554/elife.63545), 2021-01-08
Supplement: supp [file elife-63545-supp-v1.zip › elife_poa_e63545_Figure_1_figure_supplement_1_source_data_1.xlsx]

## Sheet: plotted data
	CAGA_LUC ASSAY HEK-293T S4 KO clones
					Experiment 1		Experiment 2		Experiment 3
		Cell lines	expression vector	Treatment	Luc/Ren		Luc/Ren		Luc/Ren		Average 3 experiments	STDEV	number experiments
		293T parental		untreated	0.292788		0.299781		0.260176		0.284248	0.0211385	3
		293T parental		8h Activin	4.51469		6.89984		2.24124		4.55192	2.32952	3
		HEK293T Smad4 KO clone 1		untreated	0.133164		0.190775		0.0613349		0.128424	0.06485	3
		HEK293T Smad4 KO clone 1		8h Activin	0.205844		0.291677		0.144494		0.214005	0.0739303	3
		HEK293T Smad4 KO clone 1	SMAD4	untreated	0.890242		0.71526		0.389312		0.664938	0.254228	3
		HEK293T Smad4 KO clone 1	SMAD4	8h Activin	6.52753		4.56127		1.33479		4.1412	2.62173	3
		HEK 293T Smad4 KO clone 2		untreated	0.0973368		0.163854		0.0475455		0.102912	0.0583544	3
		HEK 293T Smad4 KO clone 2		8h Activin	0.107051		0.209041		0.0953291		0.13714	0.062543	3
		HEK 293T Smad4 KO clone 2	SMAD4	untreated	0.599409		1.019		0.367204		0.661872	0.330358	3
		HEK 293T Smad4 KO clone 2	SMAD4	8h Activin	3.72498		5.38591		1.50104		3.53731	1.94922	3
	Lab nomenclature	Official nomenclature for publication
	HEK293T Smad4 KO clone 5_1	HEK293T Smad4 KO clone 1
	HEK293T Smad4 KO clone 5_13	HEK293T Smad4 KO clone 2

## Sheet: Experiment 1
LUC_47	Experiment 1	14.10.2019	plate 50000 cells in 24 well plate
		15.10.2019	200 ng CAGA luc 50 ng of Ren and 50 ng of GFPSmad4 or C1 GFP and 2ul fugene
		16.10.2019	starve in 0.5% FBS
		17.10.2019	treat Acticvin 8h
				Cell line	CAGA12 luciferase reporter	expression plasmid	Treatment	LUC	REN	LUC/REN	average LUC/REN
			1	293T parental	200ng CAGA luc	50ng c1GFP	untreated	2628480	8911936	0.294939	0.292788
			2	293T parental	200ng CAGA luc	50ng c1GFP	untreated	1810320	6367584	0.284302
			3	293T parental	200ng CAGA luc	50ng c1GFP	untreated	1763960	7031016	0.250883
			4	293T parental	200ng CAGA luc	50ng c1GFP	untreated	3774760	11068820	0.341026
			5	293T parental	200ng CAGA luc	50ng c1GFP	8h Activin	49831160	10980836	4.53801	4.51469
			6	293T parental	200ng CAGA luc	50ng c1GFP	8h Activin	42664120	11071148	3.85363
			7	293T parental	200ng CAGA luc	50ng c1GFP	8h Activin	64373480	11645252	5.52787
			8	293T parental	200ng CAGA luc	50ng c1GFP	8h Activin	48188640	11641904	4.13924
			9	293T CRISPR SMAD4 KO clone 5_1	200ng CAGA luc	50ng c1GFP	untreated	922800	6664552	0.138464	0.133164
			10	293T CRISPR SMAD4 KO clone 5_1	200ng CAGA luc	50ng c1GFP	untreated	998440	6416096	0.155615
			11	293T CRISPR SMAD4 KO clone 5_1	200ng CAGA luc	50ng c1GFP	untreated	692440	6513704	0.106305
			12	293T CRISPR SMAD4 KO clone 5_1	200ng CAGA luc	50ng c1GFP	untreated	1030440	7790420	0.13227
			13	293T CRISPR SMAD4 KO clone 5_1	200ng CAGA luc	50ng c1GFP	8h Activin	2146400	8891468	0.2414	0.205844
			14	293T CRISPR SMAD4 KO clone 5_1	200ng CAGA luc	50ng c1GFP	8h Activin	1962360	8872876	0.221164
			15	293T CRISPR SMAD4 KO clone 5_1	200ng CAGA luc	50ng c1GFP	8h Activin	1327280	8419524	0.157643
			16	293T CRISPR SMAD4 KO clone 5_1	200ng CAGA luc	50ng c1GFP	8h Activin	1875920	9233284	0.203169
			17	293T CRISPR SMAD4 KO clone 5_1	200ng CAGA luc	50ng GFP Smad4	untreated	8503400	9868960	0.861631	0.890242
			18	293T CRISPR SMAD4 KO clone 5_1	200ng CAGA luc	50ng GFP Smad4	untreated	8206520	9735596	0.84294
			19	293T CRISPR SMAD4 KO clone 5_1	200ng CAGA luc	50ng GFP Smad4	untreated	9742120	9981392	0.976028
			20	293T CRISPR SMAD4 KO clone 5_1	200ng CAGA luc	50ng GFP Smad4	untreated	8023280	9113552	0.880368
			21	293T CRISPR SMAD4 KO clone 5_1	200ng CAGA luc	50ng GFP Smad4	8h Activin	61072040	9353828	6.5291	6.52753
			22	293T CRISPR SMAD4 KO clone 5_1	200ng CAGA luc	50ng GFP Smad4	8h Activin	55863280	9584976	5.82821
			23	293T CRISPR SMAD4 KO clone 5_1	200ng CAGA luc	50ng GFP Smad4	8h Activin	69291760	8716692	7.94932
			24	293T CRISPR SMAD4 KO clone 5_1	200ng CAGA luc	50ng GFP Smad4	8h Activin	57310840	9875204	5.80351
			25	293T CRISPR SMAD4 KO clone 5_13	200ng CAGA luc	50ng GFP Smad4	untreated	1204640	8270424	0.145656	0.0973368
			26	293T CRISPR SMAD4 KO clone 5_13	200ng CAGA luc	50ng GFP Smad4	untreated	589000	6846620	0.0860279
			27	293T CRISPR SMAD4 KO clone 5_13	200ng CAGA luc	50ng c1GFP	untreated	456640	6367728	0.0717116
			28	293T CRISPR SMAD4 KO clone 5_13	200ng CAGA luc	50ng c1GFP	untreated	662480	7707608	0.0859514
			29	293T CRISPR SMAD4 KO clone 5_13	200ng CAGA luc	50ng c1GFP	8h Activin	757520	9125316	0.083013	0.107051
			30	293T CRISPR SMAD4 KO clone 5_13	200ng CAGA luc	50ng c1GFP	8h Activin	1581280	11790784	0.134112
			31	293T CRISPR SMAD4 KO clone 5_13	200ng CAGA luc	50ng c1GFP	8h Activin	1256360	10880172	0.115472
			32	293T CRISPR SMAD4 KO clone 5_13	200ng CAGA luc	50ng c1GFP	8h Activin	879360	9197808	0.0956054
			33	293T CRISPR SMAD4 KO clone 5_13	200ng CAGA luc	50ng c1GFP	untreated	4419360	7474068	0.591292	1.56623
			34	293T CRISPR SMAD4 KO clone 5_13	200ng CAGA luc	50ng c1GFP	untreated	8702880	10749284	0.809624
			35	293T CRISPR SMAD4 KO clone 5_13	200ng CAGA luc	50ng GFP Smad4	untreated	3319120	772434	4.29696
			36	293T CRISPR SMAD4 KO clone 5_13	200ng CAGA luc	50ng GFP Smad4	untreated	4417920	7791448	0.567022
			37	293T CRISPR SMAD4 KO clone 5_13	200ng CAGA luc	50ng GFP Smad4	8h Activin	27941760	7271100	3.84285	3.72498
			38	293T CRISPR SMAD4 KO clone 5_13	200ng CAGA luc	50ng GFP Smad4	8h Activin	23121400	6577216	3.51538
			39	293T CRISPR SMAD4 KO clone 5_13	200ng CAGA luc	50ng GFP Smad4	8h Activin	31210880	7838788	3.9816
			40	293T CRISPR SMAD4 KO clone 5_13	200ng CAGA luc	50ng GFP Smad4	8h Activin	31189440	8760848	3.56009

## Sheet: Experiment 2
LUC_48	Experiment 2	21.10.2019	plate 50000 cells in 24 well plate
		22.10.2019	200 ng CAGA luc 50 ng of Ren and 50 ng of GFPSmad4 or C1 GFP and 2ul fugene
		23.10.2019	starve in 0.5% FBS
		24.10.2019	treat Acticvin 8h
				Cell line	CAGA12 luciferase reporter	expression plasmid	Treatment	LUC	REN	LUC/REN	average LUC/REN
			1	293T parental	200ng CAGA luc	50ng c1GFP	untreated	3389000	8677560	0.390548	0.299781
			2	293T parental	200ng CAGA luc	50ng c1GFP	untreated	1802440	7854480	0.229479
			3	293T parental	200ng CAGA luc	50ng c1GFP	untreated	3388920	11033960	0.307135
			4	293T parental	200ng CAGA luc	50ng c1GFP	untreated	2283080	8394880	0.271961
			5	293T parental	200ng CAGA luc	50ng c1GFP	8h Activin	118785280	15454920	7.68592	6.89984
			6	293T parental	200ng CAGA luc	50ng c1GFP	8h Activin	137216200	23982640	5.72148
			7	293T parental	200ng CAGA luc	50ng c1GFP	8h Activin	129254960	19883760	6.50053
			8	293T parental	200ng CAGA luc	50ng c1GFP	8h Activin	116972560	15208200	7.69141
			9	293T CRISPR SMAD4 KO clone 5_1	200ng CAGA luc	50ng c1GFP	untreated	2931920	11470920	0.255596	0.190775
			10	293T CRISPR SMAD4 KO clone 5_1	200ng CAGA luc	50ng c1GFP	untreated	1346600	8748240	0.153928
			11	293T CRISPR SMAD4 KO clone 5_1	200ng CAGA luc	50ng c1GFP	untreated	2221280	12244560	0.18141
			12	293T CRISPR SMAD4 KO clone 5_1	200ng CAGA luc	50ng c1GFP	untreated	1867960	10849760	0.172166
			13	293T CRISPR SMAD4 KO clone 5_1	200ng CAGA luc	50ng c1GFP	8h Activin	2597080	11013200	0.235815	0.291677
			14	293T CRISPR SMAD4 KO clone 5_1	200ng CAGA luc	50ng c1GFP	8h Activin	6200560	14226080	0.435859
			15	293T CRISPR SMAD4 KO clone 5_1	200ng CAGA luc	50ng c1GFP	8h Activin	2252720	9438600	0.238671
			16	293T CRISPR SMAD4 KO clone 5_1	200ng CAGA luc	50ng c1GFP	8h Activin	2394640	9340800	0.256363
			17	293T CRISPR SMAD4 KO clone 5_1	200ng CAGA luc	50ng GFP Smad4	untreated	7132320	10097920	0.706316	0.71526
			18	293T CRISPR SMAD4 KO clone 5_1	200ng CAGA luc	50ng GFP Smad4	untreated	8052320	9865120	0.816241
			19	293T CRISPR SMAD4 KO clone 5_1	200ng CAGA luc	50ng GFP Smad4	untreated	7191080	10870280	0.661536
			20	293T CRISPR SMAD4 KO clone 5_1	200ng CAGA luc	50ng GFP Smad4	untreated	7281680	10756680	0.676945
			21	293T CRISPR SMAD4 KO clone 5_1	200ng CAGA luc	50ng GFP Smad4	8h Activin	93131680	18416200	5.05705	4.56127
			22	293T CRISPR SMAD4 KO clone 5_1	200ng CAGA luc	50ng GFP Smad4	8h Activin	67406640	15850760	4.25258
			23	293T CRISPR SMAD4 KO clone 5_1	200ng CAGA luc	50ng GFP Smad4	8h Activin	81044360	18172440	4.45974
			24	293T CRISPR SMAD4 KO clone 5_1	200ng CAGA luc	50ng GFP Smad4	8h Activin	83849920	18734520	4.47569
			25	293T CRISPR SMAD4 KO clone 5_13	200ng CAGA luc	50ng GFP Smad4	untreated	1617880	8253440	0.196025	0.163854
			26	293T CRISPR SMAD4 KO clone 5_13	200ng CAGA luc	50ng GFP Smad4	untreated	1666000	10109320	0.164798
			27	293T CRISPR SMAD4 KO clone 5_13	200ng CAGA luc	50ng c1GFP	untreated	1436120	10459600	0.137302
			28	293T CRISPR SMAD4 KO clone 5_13	200ng CAGA luc	50ng c1GFP	untreated	1518880	9656480	0.157291
			29	293T CRISPR SMAD4 KO clone 5_13	200ng CAGA luc	50ng c1GFP	8h Activin	2440160	12698960	0.192154	0.209041
			30	293T CRISPR SMAD4 KO clone 5_13	200ng CAGA luc	50ng c1GFP	8h Activin	3127520	14810640	0.211167
			31	293T CRISPR SMAD4 KO clone 5_13	200ng CAGA luc	50ng c1GFP	8h Activin	3532400	16901520	0.208999
			32	293T CRISPR SMAD4 KO clone 5_13	200ng CAGA luc	50ng c1GFP	8h Activin	3552400	15870080	0.223843
			33	293T CRISPR SMAD4 KO clone 5_13	200ng CAGA luc	50ng c1GFP	untreated	19039080	17172640	1.10869	1.019
			34	293T CRISPR SMAD4 KO clone 5_13	200ng CAGA luc	50ng c1GFP	untreated	17750840	17640240	1.00627
			35	293T CRISPR SMAD4 KO clone 5_13	200ng CAGA luc	50ng GFP Smad4	untreated	12047040	13893440	0.867103
			36	293T CRISPR SMAD4 KO clone 5_13	200ng CAGA luc	50ng GFP Smad4	untreated	23797840	21754040	1.09395
			37	293T CRISPR SMAD4 KO clone 5_13	200ng CAGA luc	50ng GFP Smad4	8h Activin	94002280	14748720	6.37359	5.38591
			38	293T CRISPR SMAD4 KO clone 5_13	200ng CAGA luc	50ng GFP Smad4	8h Activin	94383320	17013080	5.54769
			39	293T CRISPR SMAD4 KO clone 5_13	200ng CAGA luc	50ng GFP Smad4	8h Activin	118412920	25054800	4.72616
			40	293T CRISPR SMAD4 KO clone 5_13	200ng CAGA luc	50ng GFP Smad4	8h Activin	102343680	20902680	4.8962

## Sheet: Experiment 3
LUC_49	Experiment 3	28.10.2019	plate 50000 cells in 24 well plate
		29.10.2019	200 ng CAGA luc 50 ng of Ren and 50 ng of GFPSmad4 or C1 GFP and 2ul fugene
		30.10.2019	starve in 0.5% FBS
		31.10.2019	treat Acticvin 8h
				Cell line	CAGA12 luciferase reporter	expression plasmid	Treatment	LUC	REN	LUC/REN	average LUC/REN
			1	293T parental	200ng CAGA luc	50ng c1GFP	untreated	3387240	18143000	0.186697	0.260176
			2	293T parental	200ng CAGA luc	50ng c1GFP	untreated	6454320	15921520	0.405383
			3	293T parental	200ng CAGA luc	50ng c1GFP	untreated	2296760	16852720	0.136284
			4	293T parental	200ng CAGA luc	50ng c1GFP	untreated	5527840	17698240	0.312338
			5	293T parental	200ng CAGA luc	50ng c1GFP	8h Activin	108918720	61053040	1.784	2.24124
			6	293T parental	200ng CAGA luc	50ng c1GFP	8h Activin	195144360	53735400	3.63158
			7	293T parental	200ng CAGA luc	50ng c1GFP	8h Activin	106770960	58938320	1.81157
			8	293T parental	200ng CAGA luc	50ng c1GFP	8h Activin	104092320	59898120	1.73782
			9	293T CRISPR SMAD4 KO clone 5_1	200ng CAGA luc	50ng c1GFP	untreated	718360	14337000	0.0501053	0.0613349
			10	293T CRISPR SMAD4 KO clone 5_1	200ng CAGA luc	50ng c1GFP	untreated	1251080	15331360	0.0816027
			11	293T CRISPR SMAD4 KO clone 5_1	200ng CAGA luc	50ng c1GFP	untreated	814800	12872320	0.0632986
			12	293T CRISPR SMAD4 KO clone 5_1	200ng CAGA luc	50ng c1GFP	untreated	754000	14980200	0.0503331
			13	293T CRISPR SMAD4 KO clone 5_1	200ng CAGA luc	50ng c1GFP	8h Activin	6214600	33894000	0.183354	0.144494
			14	293T CRISPR SMAD4 KO clone 5_1	200ng CAGA luc	50ng c1GFP	8h Activin	3034200	33877120	0.0895649
			15	293T CRISPR SMAD4 KO clone 5_1	200ng CAGA luc	50ng c1GFP	8h Activin	5696080	31865640	0.178753
			16	293T CRISPR SMAD4 KO clone 5_1	200ng CAGA luc	50ng c1GFP	8h Activin	4312560	34144520	0.126303
			17	293T CRISPR SMAD4 KO clone 5_1	200ng CAGA luc	50ng GFP Smad4	untreated	5941560	16482160	0.360484	0.389312
			18	293T CRISPR SMAD4 KO clone 5_1	200ng CAGA luc	50ng GFP Smad4	untreated	4447280	17748720	0.250569
			19	293T CRISPR SMAD4 KO clone 5_1	200ng CAGA luc	50ng GFP Smad4	untreated	9762240	16159160	0.60413
			20	293T CRISPR SMAD4 KO clone 5_1	200ng CAGA luc	50ng GFP Smad4	untreated	5205440	15217720	0.342064
			21	293T CRISPR SMAD4 KO clone 5_1	200ng CAGA luc	50ng GFP Smad4	8h Activin	44132040	37174520	1.18716	1.33479
			22	293T CRISPR SMAD4 KO clone 5_1	200ng CAGA luc	50ng GFP Smad4	8h Activin	50059000	36949000	1.35481
			23	293T CRISPR SMAD4 KO clone 5_1	200ng CAGA luc	50ng GFP Smad4	8h Activin	54848400	39801680	1.37804
			24	293T CRISPR SMAD4 KO clone 5_1	200ng CAGA luc	50ng GFP Smad4	8h Activin	56134680	39554840	1.41916
			25	293T CRISPR SMAD4 KO clone 5_13	200ng CAGA luc	50ng GFP Smad4	untreated	1358840	27803920	0.0488722	0.0475455
			26	293T CRISPR SMAD4 KO clone 5_13	200ng CAGA luc	50ng GFP Smad4	untreated	647280	23486280	0.0275599
			27	293T CRISPR SMAD4 KO clone 5_13	200ng CAGA luc	50ng c1GFP	untreated	535160	17966160	0.0297871
			28	293T CRISPR SMAD4 KO clone 5_13	200ng CAGA luc	50ng c1GFP	untreated	736600	8772920	0.0839629
			29	293T CRISPR SMAD4 KO clone 5_13	200ng CAGA luc	50ng c1GFP	8h Activin	10922880	44983400	0.24282	0.0953291
			30	293T CRISPR SMAD4 KO clone 5_13	200ng CAGA luc	50ng c1GFP	8h Activin	2656600	52006120	0.0510824
			31	293T CRISPR SMAD4 KO clone 5_13	200ng CAGA luc	50ng c1GFP	8h Activin	3155480	58373920	0.0540563
			32	293T CRISPR SMAD4 KO clone 5_13	200ng CAGA luc	50ng c1GFP	8h Activin	1362680	40851000	0.0333573
			33	293T CRISPR SMAD4 KO clone 5_13	200ng CAGA luc	50ng c1GFP	untreated	5960960	11436280	0.521232	0.367204
			34	293T CRISPR SMAD4 KO clone 5_13	200ng CAGA luc	50ng c1GFP	untreated	2769560	12428600	0.222838
			35	293T CRISPR SMAD4 KO clone 5_13	200ng CAGA luc	50ng GFP Smad4	untreated	4844560	20292520	0.238736
			36	293T CRISPR SMAD4 KO clone 5_13	200ng CAGA luc	50ng GFP Smad4	untreated	14540240	29917680	0.486008
			37	293T CRISPR SMAD4 KO clone 5_13	200ng CAGA luc	50ng GFP Smad4	8h Activin	60776160	43546520	1.39566	1.50104
			38	293T CRISPR SMAD4 KO clone 5_13	200ng CAGA luc	50ng GFP Smad4	8h Activin	61779160	42667040	1.44794
			39	293T CRISPR SMAD4 KO clone 5_13	200ng CAGA luc	50ng GFP Smad4	8h Activin	84368360	54505440	1.54789
			40	293T CRISPR SMAD4 KO clone 5_13	200ng CAGA luc	50ng GFP Smad4	8h Activin	85503960	53019840	1.61268
