# Supplementary material for: Mutations in SKI in Shprintzen–Goldberg syndrome lead to attenuated TGF-β responses through SKI stabilization
Source: eLife journal article supplement (doi:10.7554/elife.63545), 2021-01-08
Supplement: supp [file elife-63545-supp-v1.zip › elife_poa_e63545_Figure_1_figure_supplement_1_source_data_2.xlsx]

## Sheet: Plotted data
CAGA_LUC ASSAY HaCaT S4 KO clones			Experiment 1		Experiment 2		Experiment 3		LUC/Ren
Cell lines	expression vector		LUC/REN		LUC/REN		LUC/REN		Average	stdev	number experiments
Hacat		untreated	0.0195105		0.0312084		0.0295327		0.0267506	0.00632578	3
Hacat		TGFB 8h	2.77719		11.1447		8.27065		7.39753	4.25156	3
S4KO clone 1		untreated	0.0244156		0.0923116		0.0433856		0.0533709	0.0350321	3
S4KO clone 1		TGFB 8h	0.0315685		0.12266		0.168689		0.107639	0.0697834	3
S4KO clone 1	SMAD4	untreated	0.0393613		0.0991983		0.0402602		0.0596066	0.0342904	3
S4KO clone 1	SMAD4	TGFB 8h	2.41922		5.4442		5.72699		4.53014	1.83357	3
S4KO clone 2		untreated	0.00895791		0.0925837		0.133811		0.0784509	0.0636151	3
S4KO clone 2		TGFB 8h	0.0149897		0.105639		0.0466949		0.0557746	0.0460018	3
S4KO clone 2	SMAD4	untreated	0.0152944		0.0572752		0.123395		0.0653215	0.0544977	3
S4KO clone 2	SMAD4	TGFB 8h	1.60886		4.12388		6.72059		4.15111	2.55597	3
S4KO clone 3		untreated	0.0119805		0.0171997		0.0139954		0.0143919	0.00263211	3
S4KO clone 3		TGFB 8h	0.0258587		0.0185906		0.0189071		0.0211188	0.00410791	3
S4KO clone 3	SMAD4	untreated	0.0238479		0.0151198		0.0231816		0.0207164	0.00485826	3
S4KO clone 3	SMAD4	TGFB 8h	2.43595		4.43795		8.65673		5.17688	3.17554	3
S4KO clone 4		untreated	0.00775838		0.0453394		0.0532567		0.0354515	0.0243075	3
S4KO clone 4		TGFB 8h	0.0115103		0.109121		0.0483081		0.0563131	0.0492953	3
S4KO clone 4	SMAD4	untreated	0.0116883		0.0497378		0.0287771		0.0300677	0.0190576	3
S4KO clone 4	SMAD4	TGFB 8h	1.34722		3.62329		6.2044		3.72497	2.43018	3
Lab nomenclature	Official nomenclature for publication
HaCaTSMAD4 KO clone 2	HaCaT S4KO clone 1
HaCaT SMAD4 KO clone 5	HaCaT S4KO clone 2
HaCaT SMAD4 KO clone 8	HaCaT S4KO clone 3
HaCaTSMAD4 KO clone 9	HaCaT S4KO clone 4

## Sheet: Experiment 1
LUC-3	17.02.2015	Plate 40000 HAcaT and S4KO clones cells into 24 well plate
Experiment 1	18.02.2015	transfect with 200 ng CAGA luc and 50ng TK renilla and 2 ul fugene in prensence or not of 50 EFGP Smad4
	19.02.2015	treat for 8h with TGFB freeze plate -80C
	Cell line	CAGA12 luciferase reporter	expression plasmid	Treatment	LUC	REN	LUC/REN	average LUC/REN
1	clone2 S4KO	CAGAluc 200 ng	50ng GFP C1	untreated	160	8080	0.019802	0.0244156
2	clone2 S4KO	CAGAluc 200 ng	50ng GFP C1	untreated	200	7000	0.0285714
3	clone2 S4KO	CAGAluc 200 ng	50ng GFP C1	untreated	200	6280	0.0318471
4	clone2 S4KO	CAGAluc 200 ng	50ng GFP C1	untreated	120	6880	0.0174419
5	clone2 S4KO	CAGAluc 200 ng	50ng GFP C1	TGFB 8h	280	6960	0.0402299	0.0315685
6	clone2 S4KO	CAGAluc 200 ng	50ng GFP C1	TGFB 8h	160	6120	0.0261438
7	clone2 S4KO	CAGAluc 200 ng	50ng GFP C1	TGFB 8h	320	8000	0.04
8	clone2 S4KO	CAGAluc 200 ng	50ng GFP C1	TGFB 8h	160	8040	0.0199005
9	clone2 S4KO	CAGAluc 200 ng	50 ng GFP SMad4	untreated	440	11800	0.0372881	0.0393613
10	clone2 S4KO	CAGAluc 200 ng	50 ng GFP SMad4	untreated	480	10240	0.046875
11	clone2 S4KO	CAGAluc 200 ng	50 ng GFP SMad4	untreated	400	11400	0.0350877
12	clone2 S4KO	CAGAluc 200 ng	50 ng GFP SMad4	untreated	440	11520	0.0381944
13	clone2 S4KO	CAGAluc 200 ng	50 ng GFP SMad4	TGFB 8h	20320	7800	2.60513	2.41922
14	clone2 S4KO	CAGAluc 200 ng	50 ng GFP SMad4	TGFB 8h	28080	10520	2.6692
15	clone2 S4KO	CAGAluc 200 ng	50 ng GFP SMad4	TGFB 8h	17920	7600	2.35789
16	clone2 S4KO	CAGAluc 200 ng	50 ng GFP SMad4	TGFB 8h	18320	8960	2.04464
17	clone5 S4KO	CAGAluc 200 ng	50ng GFP C1	untreated	320	26640	0.012012	0.00895791
18	clone5 S4KO	CAGAluc 200 ng	50ng GFP C1	untreated	280	38840	0.00720906
19	clone5 S4KO	CAGAluc 200 ng	50ng GFP C1	untreated	320	32400	0.00987654
20	clone5 S4KO	CAGAluc 200 ng	50ng GFP C1	untreated	240	35640	0.00673401
21	clone5 S4KO	CAGAluc 200 ng	50ng GFP C1	TGFB 8h	560	29680	0.0188679	0.0149897
22	clone5 S4KO	CAGAluc 200 ng	50ng GFP C1	TGFB 8h	440	32240	0.0136476
23	clone5 S4KO	CAGAluc 200 ng	50ng GFP C1	TGFB 8h	480	33560	0.0143027
24	clone5 S4KO	CAGAluc 200 ng	50ng GFP C1	TGFB 8h	400	30440	0.0131406
25	clone5 S4KO	CAGAluc 200 ng	50 ng GFP SMad4	untreated	840	52520	0.0159939	0.0152944
26	clone5 S4KO	CAGAluc 200 ng	50 ng GFP SMad4	untreated	680	40360	0.0168484
27	clone5 S4KO	CAGAluc 200 ng	50 ng GFP SMad4	untreated	600	46760	0.0128315
28	clone5 S4KO	CAGAluc 200 ng	50 ng GFP SMad4	untreated	880	56760	0.0155039
29	clone5 S4KO	CAGAluc 200 ng	50 ng GFP SMad4	TGFB 8h	64440	40880	1.57632	1.60886
30	clone5 S4KO	CAGAluc 200 ng	50 ng GFP SMad4	TGFB 8h	67160	38280	1.75444
31	clone5 S4KO	CAGAluc 200 ng	50 ng GFP SMad4	TGFB 8h	63000	40360	1.56095
32	clone5 S4KO	CAGAluc 200 ng	50 ng GFP SMad4	TGFB 8h	42360	27440	1.54373
33	clone8 S4 KO	CAGAluc 200 ng	50ng GFP C1	untreated	320	19720	0.0162272	0.0119805
34	clone8 S4 KO	CAGAluc 200 ng	50ng GFP C1	untreated	200	21040	0.0095057
35	clone8 S4 KO	CAGAluc 200 ng	50ng GFP C1	untreated	240	17640	0.0136054
36	clone8 S4 KO	CAGAluc 200 ng	50ng GFP C1	untreated	240	27960	0.00858369
37	clone8 S4 KO	CAGAluc 200 ng	50ng GFP C1	TGFB 8h	560	18120	0.0309051	0.0258587
38	clone8 S4 KO	CAGAluc 200 ng	50ng GFP C1	TGFB 8h	480	19880	0.0241449
39	clone8 S4 KO	CAGAluc 200 ng	50ng GFP C1	TGFB 8h	400	20400	0.0196078
40	clone8 S4 KO	CAGAluc 200 ng	50ng GFP C1	TGFB 8h	640	22240	0.028777
41	clone8 S4 KO	CAGAluc 200 ng	50 ng GFP SMad4	untreated	680	25880	0.0262751	0.041497
42	clone8 S4 KO	CAGAluc 200 ng	50 ng GFP SMad4	untreated	3400	36000	0.0944444
43	clone8 S4 KO	CAGAluc 200 ng	50 ng GFP SMad4	untreated	680	31360	0.0216837
44	clone8 S4 KO	CAGAluc 200 ng	50 ng GFP SMad4	untreated	800	33920	0.0235849
45	clone8 S4 KO	CAGAluc 200 ng	50 ng GFP SMad4	TGFB 8h	84320	28480	2.96067	2.43595
46	clone8 S4 KO	CAGAluc 200 ng	50 ng GFP SMad4	TGFB 8h	72000	31960	2.25282
47	clone8 S4 KO	CAGAluc 200 ng	50 ng GFP SMad4	TGFB 8h	64280	29600	2.17162
48	clone8 S4 KO	CAGAluc 200 ng	50 ng GFP SMad4	TGFB 8h	65760	27880	2.35868
49	clone9 S4KO	CAGAluc 200 ng	50ng GFP C1	untreated	400	56440	0.00708717	0.00775838
50	clone9 S4KO	CAGAluc 200 ng	50ng GFP C1	untreated	400	44800	0.00892857
51	clone9 S4KO	CAGAluc 200 ng	50ng GFP C1	untreated	560	66360	0.00843882
52	clone9 S4KO	CAGAluc 200 ng	50ng GFP C1	untreated	360	54720	0.00657895
53	clone9 S4KO	CAGAluc 200 ng	50ng GFP C1	TGFB 8h	680	47560	0.0142977	0.0115103
54	clone9 S4KO	CAGAluc 200 ng	50ng GFP C1	TGFB 8h	600	57800	0.0103806
55	clone9 S4KO	CAGAluc 200 ng	50ng GFP C1	TGFB 8h	560	54080	0.010355
56	clone9 S4KO	CAGAluc 200 ng	50ng GFP C1	TGFB 8h	520	47240	0.0110076
57	clone9 S4KO	CAGAluc 200 ng	50 ng GFP SMad4	untreated	1080	84600	0.012766	0.0116883
58	clone9 S4KO	CAGAluc 200 ng	50 ng GFP SMad4	untreated	1000	90120	0.0110963
59	clone9 S4KO	CAGAluc 200 ng	50 ng GFP SMad4	untreated	840	77280	0.0108696
60	clone9 S4KO	CAGAluc 200 ng	50 ng GFP SMad4	untreated	1080	89840	0.0120214
61	clone9 S4KO	CAGAluc 200 ng	50 ng GFP SMad4	TGFB 8h	108320	73040	1.48302	1.34722
62	clone9 S4KO	CAGAluc 200 ng	50 ng GFP SMad4	TGFB 8h	111880	75560	1.48068
63	clone9 S4KO	CAGAluc 200 ng	50 ng GFP SMad4	TGFB 8h	90280	74920	1.20502
64	clone9 S4KO	CAGAluc 200 ng	50 ng GFP SMad4	TGFB 8h	90000	73760	1.22017
65	Hacat	CAGAluc 200 ng	50ng GFP C1	untreated	360	16080	0.0223881	0.0195105
66	Hacat	CAGAluc 200 ng	50ng GFP C1	untreated	280	15160	0.0184697
67	Hacat	CAGAluc 200 ng	50ng GFP C1	untreated	280	16240	0.0172414
68	Hacat	CAGAluc 200 ng	50ng GFP C1	untreated	280	14040	0.019943
69	Hacat	CAGAluc 200 ng	50ng GFP C1	TGFB 8h	10760	4600	2.33913	2.77719
70	Hacat	CAGAluc 200 ng	50ng GFP C1	TGFB 8h	9800	3440	2.84884
71	Hacat	CAGAluc 200 ng	50ng GFP C1	TGFB 8h	15000	4920	3.04878
72	Hacat	CAGAluc 200 ng	50ng GFP C1	TGFB 8h	14360	5000	2.872

## Sheet: Experiment 2
LUC-50	27.01.2020	Plate 40000 HAcaT and S4KO clones cells into 24 well plate
Experiment 2	28.01.2020	transfect with 200 ng CAGA luc and 50ng TK renilla and 2 ul fugene in prensence or not of 50 EFGP Smad4
	31.01.2020	treat for 8h with TGFB freeze plate -80C
	Cell line	CAGA12 luciferase reporter	expression plasmid	Treatment	LUC	REN	LUC/REN	average LUC/REN
1	Hacat	CAGAluc 200 ng	50ng GFP C1	untreated	1440	45800	0.031441	0.0312084
2	Hacat	CAGAluc 200 ng	50ng GFP C1	untreated	1760	50680	0.0347277
3	Hacat	CAGAluc 200 ng	50ng GFP C1	untreated	1520	53680	0.0283159
4	Hacat	CAGAluc 200 ng	50ng GFP C1	untreated	1600	52720	0.030349
5	Hacat	CAGAluc 200 ng	50ng GFP C1	TGFB 8h	604400	48640	12.426	11.1447
6	Hacat	CAGAluc 200 ng	50ng GFP C1	TGFB 8h	526800	49000	10.751
7	Hacat	CAGAluc 200 ng	50ng GFP C1	TGFB 8h	603600	54640	11.0469
8	Hacat	CAGAluc 200 ng	50ng GFP C1	TGFB 8h	653200	63080	10.3551
9	clone2 S4KO	CAGAluc 200 ng	50ng GFP C1	untreated	1080	15200	0.0710526	0.0923116
10	clone2 S4KO	CAGAluc 200 ng	50ng GFP C1	untreated	960	14480	0.0662983
11	clone2 S4KO	CAGAluc 200 ng	50ng GFP C1	untreated	1200	8120	0.147783
12	clone2 S4KO	CAGAluc 200 ng	50ng GFP C1	untreated	1080	12840	0.0841121
13	clone2 S4KO	CAGAluc 200 ng	50ng GFP C1	TGFB 8h	1120	7640	0.146597	0.12266
14	clone2 S4KO	CAGAluc 200 ng	50ng GFP C1	TGFB 8h	1160	9280	0.125
15	clone2 S4KO	CAGAluc 200 ng	50ng GFP C1	TGFB 8h	1040	8320	0.125
16	clone2 S4KO	CAGAluc 200 ng	50ng GFP C1	TGFB 8h	1200	12760	0.0940439
17	clone2 S4KO	CAGAluc 200 ng	50 ng GFP SMad4	untreated	1080	11320	0.0954064	0.0991983
18	clone2 S4KO	CAGAluc 200 ng	50 ng GFP SMad4	untreated	1160	11480	0.101045
19	clone2 S4KO	CAGAluc 200 ng	50 ng GFP SMad4	untreated	1200	10560	0.113636
20	clone2 S4KO	CAGAluc 200 ng	50 ng GFP SMad4	untreated	1200	13840	0.0867052
21	clone2 S4KO	CAGAluc 200 ng	50 ng GFP SMad4	TGFB 8h	66400	11360	5.84507	5.4442
22	clone2 S4KO	CAGAluc 200 ng	50 ng GFP SMad4	TGFB 8h	74400	10440	7.12644
23	clone2 S4KO	CAGAluc 200 ng	50 ng GFP SMad4	TGFB 8h	55600	11280	4.92908
24	clone2 S4KO	CAGAluc 200 ng	50 ng GFP SMad4	TGFB 8h	47600	12280	3.87622
25	clone5 S4KO	CAGAluc 200 ng	50ng GFP C1	untreated	1080	16800	0.0642857	0.0925837
26	clone5 S4KO	CAGAluc 200 ng	50ng GFP C1	untreated	1360	15600	0.0871795
27	clone5 S4KO	CAGAluc 200 ng	50ng GFP C1	untreated	1080	9720	0.111111
28	clone5 S4KO	CAGAluc 200 ng	50ng GFP C1	untreated	1000	9280	0.107759
29	clone5 S4KO	CAGAluc 200 ng	50ng GFP C1	TGFB 8h	1320	16040	0.0822943	0.105639
30	clone5 S4KO	CAGAluc 200 ng	50ng GFP C1	TGFB 8h	1120	9120	0.122807
31	clone5 S4KO	CAGAluc 200 ng	50ng GFP C1	TGFB 8h	1120	8320	0.134615
32	clone5 S4KO	CAGAluc 200 ng	50ng GFP C1	TGFB 8h	1120	13520	0.0828402
33	clone5 S4KO	CAGAluc 200 ng	50 ng GFP SMad4	untreated	1360	20120	0.0675944	0.0572752
34	clone5 S4KO	CAGAluc 200 ng	50 ng GFP SMad4	untreated	1120	21680	0.0516605
35	clone5 S4KO	CAGAluc 200 ng	50 ng GFP SMad4	untreated	960	18600	0.0516129
36	clone5 S4KO	CAGAluc 200 ng	50 ng GFP SMad4	untreated	1160	19920	0.0582329
37	clone5 S4KO	CAGAluc 200 ng	50 ng GFP SMad4	TGFB 8h	78400	16520	4.74576	4.12388
38	clone5 S4KO	CAGAluc 200 ng	50 ng GFP SMad4	TGFB 8h	72000	16160	4.45545
39	clone5 S4KO	CAGAluc 200 ng	50 ng GFP SMad4	TGFB 8h	74400	17760	4.18919
40	clone5 S4KO	CAGAluc 200 ng	50 ng GFP SMad4	TGFB 8h	50800	16360	3.10513
41	clone8 S4 KO	CAGAluc 200 ng	50ng GFP C1	untreated	1440	63080	0.0228282	0.0171997
42	clone8 S4 KO	CAGAluc 200 ng	50ng GFP C1	untreated	1320	68880	0.0191638
43	clone8 S4 KO	CAGAluc 200 ng	50ng GFP C1	untreated	1280	68760	0.0186155
44	clone8 S4 KO	CAGAluc 200 ng	50ng GFP C1	untreated	1560	190440	0.00819156
45	clone8 S4 KO	CAGAluc 200 ng	50ng GFP C1	TGFB 8h	1280	73520	0.0174102	0.0185906
46	clone8 S4 KO	CAGAluc 200 ng	50ng GFP C1	TGFB 8h	1280	69320	0.0184651
47	clone8 S4 KO	CAGAluc 200 ng	50ng GFP C1	TGFB 8h	1200	63640	0.0188561
48	clone8 S4 KO	CAGAluc 200 ng	50ng GFP C1	TGFB 8h	1320	67240	0.0196312
49	clone8 S4 KO	CAGAluc 200 ng	50 ng GFP SMad4	untreated	1520	94960	0.0160067	0.0151198
50	clone8 S4 KO	CAGAluc 200 ng	50 ng GFP SMad4	untreated	1960	109680	0.0178702
51	clone8 S4 KO	CAGAluc 200 ng	50 ng GFP SMad4	untreated	1720	120560	0.0142668
52	clone8 S4 KO	CAGAluc 200 ng	50 ng GFP SMad4	untreated	1800	145920	0.0123355
53	clone8 S4 KO	CAGAluc 200 ng	50 ng GFP SMad4	TGFB 8h	468800	105080	4.46136	4.43795
54	clone8 S4 KO	CAGAluc 200 ng	50 ng GFP SMad4	TGFB 8h	630000	127640	4.93576
55	clone8 S4 KO	CAGAluc 200 ng	50 ng GFP SMad4	TGFB 8h	413600	96040	4.30654
56	clone8 S4 KO	CAGAluc 200 ng	50 ng GFP SMad4	TGFB 8h	524800	129640	4.04813
57	clone9 S4KO	CAGAluc 200 ng	50ng GFP C1	untreated	1040	22400	0.0464286	0.0453394
58	clone9 S4KO	CAGAluc 200 ng	50ng GFP C1	untreated	1120	58640	0.0190996
59	clone9 S4KO	CAGAluc 200 ng	50ng GFP C1	untreated	1160	16880	0.0687204
60	clone9 S4KO	CAGAluc 200 ng	50ng GFP C1	untreated	880	18680	0.0471092
61	clone9 S4KO	CAGAluc 200 ng	50ng GFP C1	TGFB 8h	1320	19120	0.0690377	0.109121
62	clone9 S4KO	CAGAluc 200 ng	50ng GFP C1	TGFB 8h	1000	11160	0.0896057
63	clone9 S4KO	CAGAluc 200 ng	50ng GFP C1	TGFB 8h	1320	29280	0.045082
64	clone9 S4KO	CAGAluc 200 ng	50ng GFP C1	TGFB 8h	1080	4640	0.232759
73	clone9 S4KO	CAGAluc 200 ng	50 ng GFP SMad4	untreated	1240	30680	0.0404172	0.0497378
74	clone9 S4KO	CAGAluc 200 ng	50 ng GFP SMad4	untreated	1040	23040
75	clone9 S4KO	CAGAluc 200 ng	50 ng GFP SMad4	untreated	1240	21640	0.0573013
76	clone9 S4KO	CAGAluc 200 ng	50 ng GFP SMad4	untreated	1240	24080	0.051495
77	clone9 S4KO	CAGAluc 200 ng	50 ng GFP SMad4	TGFB 8h	70000	18360	3.81264	3.62329
78	clone9 S4KO	CAGAluc 200 ng	50 ng GFP SMad4	TGFB 8h	104400	25240	4.13629
79	clone9 S4KO	CAGAluc 200 ng	50 ng GFP SMad4	TGFB 8h	81200	23120	3.51211
80	clone9 S4KO	CAGAluc 200 ng	50 ng GFP SMad4	TGFB 8h	60400	19920	3.03213

## Sheet: Experiment 3
LUC-51	3.02.2020	Plate 40000 HAcaT and S4KO clones cells into 24 well plate
Experiment 3	4.02.2020	transfect with 200 ng CAGA luc and 50ng TK renilla and 2 ul fugene in prensence or not of 50 EFGP Smad4
	6.02.2020	treat for 8h with TGFB freeze plate -80C
	Cell line	CAGA12 luciferase reporter	expression plasmid	Treatment	LUC	REN	LUC/REN	average LUC/REN
1	Hacat	CAGAluc 200 ng	50ng GFP C1	untreated	1560	48160	0.032392	0.0295327
2	Hacat	CAGAluc 200 ng	50ng GFP C1	untreated	1600	52320	0.030581
3	Hacat	CAGAluc 200 ng	50ng GFP C1	untreated	1480	55320	0.0267534
4	Hacat	CAGAluc 200 ng	50ng GFP C1	untreated	1360	47880	0.0284043
5	Hacat	CAGAluc 200 ng	50ng GFP C1	TGFB 8h	368400	50920	7.23488	8.27065
6	Hacat	CAGAluc 200 ng	50ng GFP C1	TGFB 8h	492800	47000	10.4851
7	Hacat	CAGAluc 200 ng	50ng GFP C1	TGFB 8h	410400	53400	7.68539
8	Hacat	CAGAluc 200 ng	50ng GFP C1	TGFB 8h	407200	53040	7.67722
9	clone2	CAGAluc 200 ng	50ng GFP C1	untreated	1120	24200	0.046281	0.0433856
10	clone2	CAGAluc 200 ng	50ng GFP C1	untreated	1040	21320	0.0487805
11	clone2	CAGAluc 200 ng	50ng GFP C1	untreated	1000	23560	0.0424448
12	clone2	CAGAluc 200 ng	50ng GFP C1	untreated	960	26640	0.036036
13	clone2	CAGAluc 200 ng	50ng GFP C1	TGFB 8h	1280	16120	0.0794045	0.168689
14	clone2	CAGAluc 200 ng	50ng GFP C1	TGFB 8h	1360	20440	0.0665362
15	clone2	CAGAluc 200 ng	50ng GFP C1	TGFB 8h	10280	23240	0.442341
16	clone2	CAGAluc 200 ng	50ng GFP C1	TGFB 8h	1560	18040	0.0864745
17	clone2	CAGAluc 200 ng	50 ng GFP SMad4	untreated	1800	53320	0.0337584	0.0402602
18	clone2	CAGAluc 200 ng	50 ng GFP SMad4	untreated	2440	63240	0.0385832
19	clone2	CAGAluc 200 ng	50 ng GFP SMad4	untreated	2080	42440	0.0490104
20	clone2	CAGAluc 200 ng	50 ng GFP SMad4	untreated	2040	51400	0.0396887
21	clone2	CAGAluc 200 ng	50 ng GFP SMad4	TGFB 8h	442000	52680	8.39028	5.72699
22	clone2	CAGAluc 200 ng	50 ng GFP SMad4	TGFB 8h	276080	57640	4.78973
23	clone2	CAGAluc 200 ng	50 ng GFP SMad4	TGFB 8h	337200	60880	5.53876
24	clone2	CAGAluc 200 ng	50 ng GFP SMad4	TGFB 8h	198400	47360	4.18919
25	clone5	CAGAluc 200 ng	50ng GFP C1	untreated	920	2480	0.370968	0.133811
26	clone5	CAGAluc 200 ng	50ng GFP C1	untreated	880	16120	0.0545906
27	clone5	CAGAluc 200 ng	50ng GFP C1	untreated	1080	15960	0.0676692
28	clone5	CAGAluc 200 ng	50ng GFP C1	untreated	1000	23800	0.0420168
29	clone5	CAGAluc 200 ng	50ng GFP C1	TGFB 8h	1120	30640	0.0365535	0.0466949
30	clone5	CAGAluc 200 ng	50ng GFP C1	TGFB 8h	1160	26040	0.0445469
31	clone5	CAGAluc 200 ng	50ng GFP C1	TGFB 8h	1120	18800	0.0595745
32	clone5	CAGAluc 200 ng	50ng GFP C1	TGFB 8h	1160	25160	0.0461049
33	clone5	CAGAluc 200 ng	50 ng GFP SMad4	untreated	13200	60760	0.217248	0.123395
34	clone5	CAGAluc 200 ng	50 ng GFP SMad4	untreated	15600	67160	0.232281
35	clone5	CAGAluc 200 ng	50 ng GFP SMad4	untreated	1560	79280	0.0196771
36	clone5	CAGAluc 200 ng	50 ng GFP SMad4	untreated	1440	59080	0.0243737
37	clone5	CAGAluc 200 ng	50 ng GFP SMad4	TGFB 8h	363200	42960	8.45438	6.72059
38	clone5	CAGAluc 200 ng	50 ng GFP SMad4	TGFB 8h	413200	61040	6.76933
39	clone5	CAGAluc 200 ng	50 ng GFP SMad4	TGFB 8h	300000	52600	5.70342
40	clone5	CAGAluc 200 ng	50 ng GFP SMad4	TGFB 8h	319200	53600	5.95522
41	clone8	CAGAluc 200 ng	50ng GFP C1	untreated	1720	127640	0.0134754	0.0139954
42	clone8	CAGAluc 200 ng	50ng GFP C1	untreated	1560	107720	0.014482
43	clone8	CAGAluc 200 ng	50ng GFP C1	untreated	1760	119840	0.0146862
44	clone8	CAGAluc 200 ng	50ng GFP C1	untreated	1560	116960	0.0133379
45	clone8	CAGAluc 200 ng	50ng GFP C1	TGFB 8h	2480	124800	0.0198718	0.0189071
46	clone8	CAGAluc 200 ng	50ng GFP C1	TGFB 8h	2240	119360	0.0187668
47	clone8	CAGAluc 200 ng	50ng GFP C1	TGFB 8h	2080	116520	0.017851
48	clone8	CAGAluc 200 ng	50ng GFP C1	TGFB 8h	2240	117040	0.0191388
49	clone8	CAGAluc 200 ng	50 ng GFP SMad4	untreated	1320	57120	0.0231092	0.0231816
50	clone8	CAGAluc 200 ng	50 ng GFP SMad4	untreated	1440	61280	0.0234987
51	clone8	CAGAluc 200 ng	50 ng GFP SMad4	untreated	1400	60080	0.0233023
52	clone8	CAGAluc 200 ng	50 ng GFP SMad4	untreated	1400	61360	0.0228162
53	clone8	CAGAluc 200 ng	50 ng GFP SMad4	TGFB 8h	491200	44360	11.073	8.65673
54	clone8	CAGAluc 200 ng	50 ng GFP SMad4	TGFB 8h	377200	40000	9.43
55	clone8	CAGAluc 200 ng	50 ng GFP SMad4	TGFB 8h	282000	48080	5.86522
56	clone8	CAGAluc 200 ng	50 ng GFP SMad4	TGFB 8h	457200	55360	8.25867
57	clone9	CAGAluc 200 ng	50ng GFP C1	untreated	1120	22120	0.0506329	0.0532567
58	clone9	CAGAluc 200 ng	50ng GFP C1	untreated	1160	18240	0.0635965
59	clone9	CAGAluc 200 ng	50ng GFP C1	untreated	1040	17520	0.0593607
60	clone9	CAGAluc 200 ng	50ng GFP C1	untreated	1120	28400	0.0394366
61	clone9	CAGAluc 200 ng	50ng GFP C1	TGFB 8h	1480	24280	0.0609555	0.0483081
62	clone9	CAGAluc 200 ng	50ng GFP C1	TGFB 8h	1040	21480	0.0484171
63	clone9	CAGAluc 200 ng	50ng GFP C1	TGFB 8h	1200	30000	0.04
64	clone9	CAGAluc 200 ng	50ng GFP C1	TGFB 8h	1200	27360	0.0438596
73	clone9	CAGAluc 200 ng	50 ng GFP SMad4	untreated	2000	82040	0.0243784	0.0287771
74	clone9	CAGAluc 200 ng	50 ng GFP SMad4	untreated	2320	105760	0.0219365
75	clone9	CAGAluc 200 ng	50 ng GFP SMad4	untreated	1920	51440	0.037325
76	clone9	CAGAluc 200 ng	50 ng GFP SMad4	untreated	2160	68640	0.0314685
77	clone9	CAGAluc 200 ng	50 ng GFP SMad4	TGFB 8h	414000	71080	5.82442	6.2044
78	clone9	CAGAluc 200 ng	50 ng GFP SMad4	TGFB 8h	410800	60200	6.82392
79	clone9	CAGAluc 200 ng	50 ng GFP SMad4	TGFB 8h	362400	67080	5.4025
80	clone9	CAGAluc 200 ng	50 ng GFP SMad4	TGFB 8h	468800	69280	6.76674
