# Supplementary material for: Mutations in SKI in Shprintzen–Goldberg syndrome lead to attenuated TGF-β responses through SKI stabilization
Source: eLife journal article supplement (doi:10.7554/elife.63545), 2021-01-08
Supplement: supp [file elife-63545-supp-v1.zip › elife_poa_e63545_Figure_1_figure_supplement_1_source_data_3.xlsx]

## Sheet: SKIL plotted data
		Experiment 1				Experiment 2				Experiment 3				Experiment 4				Average experiments
		Fold induction normalised to Parental	Cell lines	Treatment		Fold induction normalised to Parental	Cell lines	Treatment		Fold induction normalised to Parental	Cell lines	Treatment		Fold induction normalised to Parental	Cell lines	Treatment		average Fold induction normalised to Parental	stdev	number experiment	Cell lines	Treatment
		0.695872	S4KO clone 1	untreated		0.730304	S4KO clone 1	untreated		1.75191	S4KO clone 1	untreated		1.23539	S4KO clone 1	untreated		1.10337	0.49775	4	S4KO clone 1	untreated
		1.5	S4KO clone 1	6h TGF		0.184566	S4KO clone 1	6h TGF		2.30526	S4KO clone 1	6h		1.95933	S4KO clone 1	6h		1.48729	0.929004	4	S4KO clone 1	6h
		1.2	S4 KO clone 2	untreated		0.540838	S4 KO clone 2	untreated		2.33426	S4 KO clone 2	untreated		2.14957	S4 KO clone 2	untreated		1.55617	0.839702	4	S4 KO clone 2	untreated
		1	S4 KO clone 2	6h TGF		0.381376	S4 KO clone 2	6h TGF		2.38231	S4 KO clone 2	6h		2.01898	S4 KO clone 2	6h		1.44567	0.919661	4	S4 KO clone 2	6h
		1.2	S4 KO clone 3	untreated		0.159407	S4 KO clone 3	untreated		1.22656	S4 KO clone 3	untreated		0.863193	S4 KO clone 3	untreated		0.86229	0.496919	4	S4 KO clone 3	untreated
			S4 KO clone 3	6h TGF		0.374844	S4 KO clone 3	6h TGF		2.24505	S4 KO clone 3	6h		1.41035	S4 KO clone 3	6h		1.34342	0.9369	4	S4 KO clone 3	6h
		1	S4 KO clone 4	untreated		0.414507	S4 KO clone 4	untreated		2.24133	S4 KO clone 4	untreated		1.79519	S4 KO clone 4	untreated		1.36276	0.814384	4	S4 KO clone 4	untreated
		0.9	S4 KO clone 4	6h TGF		0.802152	S4 KO clone 4	6h TGF		2.20379	S4 KO clone 4	6h		1.83546	S4 KO clone 4	6h		1.43535	0.692369	4	S4 KO clone 4	6h
		1	HACAT	untreated		1	HACAT	untreated		1.00196	HACAT	untreated		1.19473	HACAT	untreated		1.04917	0.0970445	4	HACAT	untreated
		9.2	HACAT	6h TGF		6.65912	HACAT	6h TGF		5.95832	HACAT	6h		9.4307	HACAT	6h		7.81203	1.76182	4	HACAT	6h
		For statistics I used delta delta CT
		delta delta CT				delta delta CT				delta delta CT				delta delta CT
		0.523106	clone2	untreated		0.45343	S4KO clone 1	untreated		-0.797663	S4KO clone 1	untreated		-0.192191	S4KO clone 1	untreated
		-0.581772	clone2	6h TGF		2.43779	S4KO clone 1	6h TGF		-1.18202	S4KO clone 1	6h		-1.49911	S4KO clone 1	6h
		-0.282072	clone 5	untreated		0.886731	S4 KO clone 2	untreated		-1.21723	S4 KO clone 2	untreated		-1.60878	S4 KO clone 2	untreated
		-0.00855637	clone 5	6h TGF		1.39071	S4 KO clone 2	6h TGF		-1.25173	S4 KO clone 2	6h		-2.37439	S4 KO clone 2	6h
		-0.270578	clone8	untreated		2.64921	S4 KO clone 3	untreated		-0.291532	S4 KO clone 3	untreated		0.521377	S4 KO clone 3	untreated
		-6.26076	clone8	6h TGF		1.41564	S4 KO clone 3	6h TGF		-1.16453	S4 KO clone 3	6h		-0.978819	S4 KO clone 3	6h
		0.0624008	clone9	untreated		1.27053	S4 KO clone 4	untreated		-1.1467	S4 KO clone 4	untreated		-1.80185	S4 KO clone 4	untreated
		0.216858	clone9	6h TGF		0.318052	S4 KO clone 4	6h TGF		-1.01572	S4 KO clone 4	6h		-2.24497	S4 KO clone 4	6h
		0	hacat	untreated		0	HACAT	untreated		0	HACAT	untreated		0	HACAT	untreated
		-3.20611	hacat	6h TGF		-2.73533	HACAT	6h TGF		-2.57481	HACAT	6h		-6.75954	HACAT	6h
	Lab nomenclature	Official nomenclature for publication
	HaCaTSMAD4 KO clone 2	HaCaT S4KO clone 1
	HaCaT SMAD4 KO clone 5	HaCaT S4KO clone 2
	HaCaT SMAD4 KO clone 8	HaCaT S4KO clone 3
	HaCaTSMAD4 KO clone 9	HaCaT S4KO clone 4

## Sheet: SERPINE-1 plotted data
	Experiment 1				Experiment 2				Experiment 3				Experiment 4				Average experiments
	Fold induction normalised to Parental	Cell lines	Treatment		Fold induction normalised to Parental	Cell lines	Treatment		Fold induction normalised to Parental	Cell lines	Treatment		Fold induction normalised to Parental	Cell lines	Treatment		average Fold induction normalised to Parental	stdev	number experiment	Cell lines	Treatment
	0.765971	S4KO clone 1	untreated		0.61641	S4KO clone 1	untreated		0.919213	S4KO clone 1	untreated		1.14281	S4KO clone 1	untreated		0.861102	0.216295	4	S4KO clone 1	untreated
	1.05975	S4KO clone 1	6h TGF-β		1.50265	S4KO clone 1	6h TGF-β		2.06918	S4KO clone 1	6h TGF-β		2.82885	S4KO clone 1	6h TGF-β		1.86511	0.559664	4	S4KO clone 1	6h TGF-β
	1.73594	S4 KO clone 2	untreated		1.1207	S4 KO clone 2	untreated		1.36019	S4 KO clone 2	untreated		3.06696	S4 KO clone 2	untreated		1.82095	0.866674	4	S4 KO clone 2	untreated
	1.27729	S4 KO clone 2	6h TGF-β		1.7242	S4 KO clone 2	6h TGF-β		2.06828	S4 KO clone 2	6h TGF-β		5.18642	S4 KO clone 2	6h TGF-β		2.56405	1.57205	4	S4 KO clone 2	6h TGF-β
	0.00612507	S4 KO clone 3	untreated		0.285587	S4 KO clone 3	untreated		0.506489	S4 KO clone 3	untreated		0.697173	S4 KO clone 3	untreated		0.373844	0.178999	4	S4 KO clone 3	untreated
		S4 KO clone 3	6h TGF-β		0.709902	S4 KO clone 3	6h TGF-β		1.08427	S4 KO clone 3	6h TGF-β		2.00013	S4 KO clone 3	6h TGF-β		1.26477	0.541977	4	S4 KO clone 3	6h TGF-β
	1.26279	S4 KO clone 4	untreated		1.02355	S4 KO clone 4	untreated		1.78063	S4 KO clone 4	untreated		3.65914	S4 KO clone 4	untreated		1.93153	1.11356	4	S4 KO clone 4	untreated
	2.68299	S4 KO clone 4	6h TGF-β		1.43189	S4 KO clone 4	6h TGF-β		1.89971	S4 KO clone 4	6h TGF-β		4.7444	S4 KO clone 4	6h TGF-β		2.68975	1.46378	4	S4 KO clone 4	6h TGF-β
	1	HACAT	untreated		1	HACAT	untreated		1.00962	HACAT	untreated		1.3906	HACAT	untreated		1.10006	0.182665	4	HACAT	untreated
	79.2436	HACAT	6h TGF-β		35.5622	HACAT	6h TGF-β		23.7932	HACAT	6h TGF-β		66.0818	HACAT	6h TGF-β		51.1702	18.4249	4	HACAT	6h TGF-β
	For statistics I used delta delta CT
	delta delta CT				delta delta CT				delta delta CT				delta delta CT
	0.384638	S4KO clone 1	untreated		0.698038	S4KO clone 1	untreated		0.12236	S4KO clone 1	untreated		-0.192191	S4KO clone 1	untreated
	-0.0837212	S4KO clone 1	6h TGF-β		-0.587509	S4KO clone 1	6h TGF-β		-1.02697	S4KO clone 1	6h TGF-β		-1.49911	S4KO clone 1	6h TGF-β
	-0.795721	S4 KO clone 2	untreated		-0.164397	S4 KO clone 2	untreated		-0.442673	S4 KO clone 2	untreated		-1.60878	S4 KO clone 2	untreated
	-0.353085	S4 KO clone 2	6h TGF-β		-0.785931	S4 KO clone 2	6h TGF-β		-1.04815	S4 KO clone 2	6h TGF-β		-2.37439	S4 KO clone 2	6h TGF-β
	-0.270578	S4 KO clone 3	untreated		1.808	S4 KO clone 3	untreated		0.999438	S4 KO clone 3	untreated		0.521377	S4 KO clone 3	untreated
	0.057476	S4 KO clone 3	6h TGF-β		0.494308	S4 KO clone 3	6h TGF-β		-0.0313606	S4 KO clone 3	6h TGF-β		-0.978819	S4 KO clone 3	6h TGF-β
	-0.336611	S4 KO clone 4	untreated		-0.0335789	S4 KO clone 4	untreated		-0.81627	S4 KO clone 4	untreated		-1.80185	S4 KO clone 4	untreated
	-1.42384	S4 KO clone 4	6h TGF-β		-0.517918	S4 KO clone 4	6h TGF-β		-0.797206	S4 KO clone 4	6h TGF-β		-2.24497	S4 KO clone 4	6h TGF-β
	0	HACAT	untreated		0	HACAT	untreated		0	HACAT	untreated		0	HACAT	untreated
	-6.30822	HACAT	6h TGF-β		-5.15227	HACAT	6h TGF-β		-4.56544	HACAT	6h TGF-β		-6.75954	HACAT	6h TGF-β

## Sheet: SMAD7 plotted data
	Experiment 1				Experiment 2				Experiment 3				Experiment 4				Average experiments
	Fold induction normalised to Parental	Cell lines	Treatment		Fold induction normalised to Parental	Cell lines	Treatment		Fold induction normalised to Parental	Cell lines	Treatment		Fold induction normalised to Parental	Cell lines	Treatment		average Fold induction normalised to Parental	stdev	number experiment	Cell lines	Treatment
	0.452375	S4KO clone 1	untreated		0.666117	S4KO clone 1	untreated		0.912552	S4KO clone 1	untreated		0.698088	S4KO clone 1	untreated		0.682283	0.188319	4	S4KO clone 1	untreated
	0.425552	S4KO clone 1	1h TGF		1.01043	S4KO clone 1	1h TGF		1.406	S4KO clone 1	1h TGF		2.2762	S4KO clone 1	1h TGF		1.27955	0.776969	4	S4KO clone 1	1h TGF
	0.963382	S4 KO clone 2	untreated		0.912861	S4 KO clone 2	untreated		1.50447	S4 KO clone 2	untreated		1.24199	S4 KO clone 2	untreated		1.15568	0.273887	4	S4 KO clone 2	untreated
	1.41085	S4 KO clone 2	1h TGF		2.10768	S4 KO clone 2	1h TGF		1.04738	S4 KO clone 2	1h TGF		2.12176	S4 KO clone 2	1h TGF		1.67192	0.532429	4	S4 KO clone 2	1h TGF
	0.584062	S4 KO clone 3	untreated		0.705742	S4 KO clone 3	untreated		1.73791	S4 KO clone 3	untreated		1.07123	S4 KO clone 3	untreated		1.02474	0.518563	4	S4 KO clone 3	untreated
	0.99879	S4 KO clone 3	1h TGF		1.08368	S4 KO clone 3	1h TGF		3.13642	S4 KO clone 3	1h TGF		2.09311	S4 KO clone 3	1h TGF		1.828	1.00396	4	S4 KO clone 3	1h TGF
	0.579136	S4 KO clone 4	untreated		0.921029	S4 KO clone 4	untreated		1.53758	S4 KO clone 4	untreated		1.20436	S4 KO clone 4	untreated		1.06053	0.408028	4	S4 KO clone 4	untreated
	1.3	S4 KO clone 4	1h TGF		0.976963	S4 KO clone 4	1h TGF		2.3	S4 KO clone 4	1h TGF		1.9	S4 KO clone 4	1h TGF		1.61924	0.593491	4	S4 KO clone 4	1h TGF
	1	HACAT	untreated		1	HACAT	untreated		1.19344	HACAT	untreated		1.36332	HACAT	untreated		1.13919	0.175047	4	HACAT	untreated
	6.83442	HACAT	1h TGF		6.1	HACAT	1h TGF		12.7098	HACAT	1h TGF		9.44484	HACAT	1h TGF		8.77226	2.9918	4	HACAT	1h TGF
	For statistics I used delta delta CT
	delta delta CT				delta delta CT				delta delta CT				delta delta CT
	1.14441	S4KO clone 1	untreated		0.586153	S4KO clone 1	untreated		0.14954	S4KO clone 1	untreated		0.521559	S4KO clone 1	untreated
	1.23259	S4KO clone 1	1h TGF		-0.0149651	S4KO clone 1	1h TGF		-0.378885	S4KO clone 1	1h TGF		-1.13625	S4KO clone 1	1h TGF
	0.0538197	S4 KO clone 2	untreated		0.131534	S4 KO clone 2	untreated		-0.453546	S4 KO clone 2	untreated		-0.310658	S4 KO clone 2	untreated
	-0.496567	S4 KO clone 2	1h TGF		-1.07565	S4 KO clone 2	1h TGF		-0.00847435	S4 KO clone 2	1h TGF		-1.08502	S4 KO clone 2	1h TGF
	0.775806	S4 KO clone 3	untreated		0.502787	S4 KO clone 3	untreated		-0.797266	S4 KO clone 3	untreated		-0.0969067	S4 KO clone 3	untreated
	0.00174713	S4 KO clone 3	1h TGF		-0.11594	S4 KO clone 3	1h TGF		-1.64911	S4 KO clone 3	1h TGF		-5.17138	S4 KO clone 3	1h TGF
	0.788027	S4 KO clone 4	untreated		0.118681	S4 KO clone 4	untreated		-0.595945	S4 KO clone 4	untreated		-0.261126	S4 KO clone 4	untreated
	-0.407562	S4 KO clone 4	1h TGF		0.187828	S4 KO clone 4	1h TGF		-1.13314	S4 KO clone 4	1h TGF		-0.923094	S4 KO clone 4	1h TGF
	0	HACAT	untreated		0	HACAT	untreated		0	HACAT	untreated		0	HACAT	untreated
	-2.77282	HACAT	1h TGF		-2.61258	HACAT	1h TGF		-3.66625	HACAT	1h TGF		-2.74861	HACAT	1h TGF

## Sheet: JUN B plotted data
	Experiment 1				Experiment 2				Experiment 3				Experiment 4				Average experiments
	Fold induction normalised to Parental	Cell lines	Treatment		Fold induction normalised to Parental	Cell lines	Treatment		Fold induction normalised to Parental	Cell lines	Treatment		Fold induction normalised to Parental	Cell lines	Treatment		average Fold induction normalised to Parental	stdev	number experiment	Cell lines	Treatment
	0.657134	S4KO clone 1	untreated		0.946172	S4KO clone 1	untreated		0.919213	S4KO clone 1	untreated		1.33949	S4KO clone 1	untreated		0.965503	0.281352	4	S4KO clone 1	untreated
	0.841874	S4KO clone 1	1h TGF		0.550929	S4KO clone 1	1h TGF		2.36589	S4KO clone 1	1h TGF		3.1211	S4KO clone 1	1h TGF		1.71995	1.2272	4	S4KO clone 1	1h TGF
	1.00948	S4 KO clone 2	untreated		0.221652	S4 KO clone 2	untreated		1.36019	S4 KO clone 2	untreated		0.838331	S4 KO clone 2	untreated		0.857415	0.47626	4	S4 KO clone 2	untreated
	1.30678	S4 KO clone 2	1h TGF		2.05641	S4 KO clone 2	1h TGF		1.52389	S4 KO clone 2	1h TGF		2.45124	S4 KO clone 2	1h TGF		1.83458	0.517877	4	S4 KO clone 2	1h TGF
	0.481594	S4 KO clone 3	untreated		0.400905	S4 KO clone 3	untreated		0.506489	S4 KO clone 3	untreated		1.00193	S4 KO clone 3	untreated		0.59773	0.273211	4	S4 KO clone 3	untreated
	1.28085	S4 KO clone 3	1h TGF		1.2071	S4 KO clone 3	1h TGF		1.15416	S4 KO clone 3	1h TGF		1.71755	S4 KO clone 3	1h TGF		1.33991	0.257061	4	S4 KO clone 3	1h TGF
	0.648628	S4 KO clone 4	untreated		0.374204	S4 KO clone 4	untreated		1.78063	S4 KO clone 4	untreated		0.73968	S4 KO clone 4	untreated		0.885785	0.616454	4	S4 KO clone 4	untreated
	1.78581	S4 KO clone 4	1h TGF		0.51977	S4 KO clone 4	1h TGF		2.60921	S4 KO clone 4	1h TGF		2.90938	S4 KO clone 4	1h TGF		1.95604	1.06885	4	S4 KO clone 4	1h TGF
	1	HACAT	untreated		1	HACAT	untreated		0.75084	HACAT	untreated		1.6551	HACAT	untreated		1.10149	0.387317	4	HACAT	untreated
	6.49551	HACAT	1h TGF		6.3	HACAT	1h TGF		15.6747	HACAT	1h TGF		11.3653	HACAT	1h TGF		9.9589	4.47331	4	HACAT	1h TGF
	For statistics I used delta delta CT
	delta delta CT				delta delta CT				delta delta CT				delta delta CT
	0.605742	S4KO clone 1	untreated		0.0798264	S4KO clone 1	untreated		0.12236	S4KO clone 1	untreated		-0.410856	S4KO clone 1	untreated
	0.248323	S4KO clone 1	1h TGF		0.860062	S4KO clone 1	1h TGF		-1.23986	S4KO clone 1	1h TGF		-1.57509	S4KO clone 1	1h TGF
	-0.0136147	S4 KO clone 2	untreated		2.17363	S4 KO clone 2	untreated		-0.442673	S4 KO clone 2	untreated		0.272138	S4 KO clone 2	untreated
	-0.386011	S4 KO clone 2	1h TGF		-1.04013	S4 KO clone 2	1h TGF		-0.533045	S4 KO clone 2	1h TGF		-1.29351	S4 KO clone 2	1h TGF
	1.05411	S4 KO clone 3	untreated		1.31867	S4 KO clone 3	untreated		0.999438	S4 KO clone 3	untreated		-0.000734329	S4 KO clone 3	untreated
	-0.357101	S4 KO clone 3	1h TGF		-0.271542	S4 KO clone 3	1h TGF		-0.191814	S4 KO clone 3	1h TGF		-0.760896	S4 KO clone 3	1h TGF
	0.624537	S4 KO clone 4	untreated		1.4181	S4 KO clone 4	untreated		-0.81627	S4 KO clone 4	untreated		0.453661	S4 KO clone 4	untreated
	-0.836576	S4 KO clone 4	1h TGF		0.944054	S4 KO clone 4	1h TGF		-1.35109	S4 KO clone 4	1h TGF		-1.49342	S4 KO clone 4	1h TGF
	0	HACAT	untreated		0	HACAT	untreated		0	HACAT	untreated		0	HACAT	untreated
	-2.69944	HACAT	1h TGF		-2.66187	HACAT	1h TGF		-4.40013	HACAT	1h TGF		-3.41281	HACAT	1h TGF

## Sheet: ID1 plotted data
	Experiment 1				Experiment 2				Experiment 3				Average experiments
	Fold induction normalised to Parental	Cell lines	Treatment		Fold induction normalised to Parental	Cell lines	Treatment		Fold induction normalised to Parental	Cell lines	Treatment		average fold induction normalised to Parental	stdev	number experiment s	Cell lines	Treatment
	0.78327	S4KO clone 1	untreated		0.577903	S4KO clone 1	untreated		0.626971	S4KO clone 1	untreated		0.662715	0.107248	3	S4KO clone 1	untreated
	1.53716	S4KO clone 1	1hBMP		1.11746	S4KO clone 1	1hBMP		1.16474	S4KO clone 1	1hBMP		1.27312	0.229886	3	S4KO clone 1	1hBMP
	0.981194	S4 KO clone 2	untreated		0.579674	S4 KO clone 2	untreated		0.756727	S4 KO clone 2	untreated		0.772532	0.201226	3	S4 KO clone 2	untreated
	1.57758	S4 KO clone 2	1hBMP		0.993754	S4 KO clone 2	1hBMP		0.799675	S4 KO clone 2	1hBMP		1.12367	0.404898	3	S4 KO clone 2	1hBMP
	0.801182	S4 KO clone 3	untreated		0.477981	S4 KO clone 3	untreated		0.641828	S4 KO clone 3	untreated		0.64033	0.161606	3	S4 KO clone 3	untreated
	1.21056	S4 KO clone 3	1hBMP		1.20521	S4 KO clone 3	1hBMP		1.17661	S4 KO clone 3	1hBMP		1.19746	0.018251	3	S4 KO clone 3	1hBMP
	0.856115	S4 KO clone 4	untreated		0.43053	S4 KO clone 4	untreated		0.67022	S4 KO clone 4	untreated		0.652288	0.213358	3	S4 KO clone 4	untreated
	1.59192	S4 KO clone 4	1hBMP		0.650278	S4 KO clone 4	1hBMP		1.33841	S4 KO clone 4	1hBMP		1.19354	0.487252	3	S4 KO clone 4	1hBMP
	1	HACAT	untreated		1	HACAT	untreated		1.02423	HACAT	untreated		1.00808	0.0139885	3	HACAT	untreated
	4.80262	HACAT	1hBMP		2.60451	HACAT	1hBMP		6.32959	HACAT	1hBMP		4.57891	1.87259	3	HACAT	1hBMP
	For statistics I used delta delta CT
	delta delta CT				delta delta CT				delta delta CT
	0.852419	S4KO clone 1	untreated		0.7911	S4KO clone 1	untreated		0.764148	S4KO clone 1	untreated
	-0.370269	S4KO clone 1	1hBMP		-0.160217	S4KO clone 1	1hBMP		-0.215727	S4KO clone 1	1hBMP
	0.52739	S4 KO clone 2	untreated		0.786687	S4 KO clone 2	untreated		0.418626	S4 KO clone 2	untreated
	-0.157713	S4 KO clone 2	1hBMP		0.00903893	S4 KO clone 2	1hBMP		0.443017	S4 KO clone 2	1hBMP
	0.319798	S4 KO clone 3	untreated		1.06498	S4 KO clone 3	untreated		0.646833	S4 KO clone 3	untreated
	-0.275672	S4 KO clone 3	1hBMP		-0.269283	S4 KO clone 3	1hBMP		-0.194433	S4 KO clone 3	1hBMP
	0.653854	S4 KO clone 4	untreated		1.21581	S4 KO clone 4	untreated		0.594633	S4 KO clone 4	untreated
	-0.621469	S4 KO clone 4	1hBMP		0.620872	S4 KO clone 4	1hBMP		-0.414902	S4 KO clone 4	1hBMP
	0	HACAT	untreated		0	HACAT	untreated		2.96059e-16	HACAT	untreated
	-1.76382	HACAT	1hBMP		-1.38101	HACAT	1hBMP		-2.60646	HACAT	1hBMP

## Sheet: ID3 plotted data
	Experiment 1				Experiment 2				Experiment 3				Average experiments
	Fold induction normalised to Parental	Cell lines	Treatment		Fold induction normalised to Parental	Cell lines	Treatment		Fold induction normalised to Parental	Cell lines	Treatment		average fold induction normalised to Parental	stdev	number experiment s	Cell lines	Treatment
	0.4	S4KO clone 1	untreated		0.9	S4KO clone 1	untreated		0.472109	S4KO clone 1	untreated		0.590703	0.270275	3	S4KO clone 1	untreated
	0.5	S4KO clone 1	1h BMP4		0.9	S4KO clone 1	1h BMP4		0.700962	S4KO clone 1	1h BMP4		0.700321	0.200001	3	S4KO clone 1	1h BMP4
	0.4	S4 KO clone 2	untreated		0.4	S4 KO clone 2	untreated		0.347223	S4 KO clone 2	untreated		0.382408	0.030471	3	S4 KO clone 2	untreated
	0.5	S4 KO clone 2	1h BMP4		0.4	S4 KO clone 2	1h BMP4		0.523486	S4 KO clone 2	1h BMP4		0.474495	0.0655751	3	S4 KO clone 2	1h BMP4
	0.8	S4 KO clone 3	untreated		0.9	S4 KO clone 3	untreated		0.926293	S4 KO clone 3	untreated		0.875431	0.0666349	3	S4 KO clone 3	untreated
	1.2	S4 KO clone 3	1h BMP4		1.7	S4 KO clone 3	1h BMP4		0.959412	S4 KO clone 3	1h BMP4		1.28647	0.37779	3	S4 KO clone 3	1h BMP4
	0.4	S4 KO clone 4	untreated		0.5	S4 KO clone 4	untreated		0.411234	S4 KO clone 4	untreated		0.437078	0.0547807	3	S4 KO clone 4	untreated
	0.7	S4 KO clone 4	1h BMP4		0.5	S4 KO clone 4	1h BMP4		0.551339	S4 KO clone 4	1h BMP4		0.58378	0.103872	3	S4 KO clone 4	1h BMP4
	1.1	HACAT	untreated		1.4	HACAT	untreated		1.00451	HACAT	untreated		1.16817	0.206368	3	HACAT	untreated
	4.3	HACAT	1h BMP4		10.1	HACAT	1h BMP4		6.54982	HACAT	1h BMP4		6.98327	2.92419	3	HACAT	1h BMP4
	For statistics I used delta delta CT
	delta delta CT				delta delta CT				delta delta CT
	1.26256	S4KO clone 1	untreated		0.0949764	S4KO clone 1	untreated		1.18411	S4KO clone 1	untreated
	0.919661	S4KO clone 1	1h BMP4		0.111284	S4KO clone 1	1h BMP4		0.51502	S4KO clone 1	1h BMP4
	1.22611	S4 KO clone 2	untreated		1.4707	S4 KO clone 2	untreated		1.65637	S4 KO clone 2	untreated
	1.0378	S4 KO clone 2	1h BMP4		1.33315	S4 KO clone 2	1h BMP4		0.963479	S4 KO clone 2	1h BMP4
	0.340735	S4 KO clone 3	untreated		0.185278	S4 KO clone 3	untreated		0.127247	S4 KO clone 3	untreated
	-0.224465	S4 KO clone 3	1h BMP4		-0.799461	S4 KO clone 3	1h BMP4		0.0598876	S4 KO clone 3	1h BMP4
	1.18516	S4 KO clone 4	untreated		1.04147	S4 KO clone 4	untreated		1.29437	S4 KO clone 4	untreated
	0.510482	S4 KO clone 4	1h BMP4		0.888535	S4 KO clone 4	1h BMP4		0.867409	S4 KO clone 4	1h BMP4
	0	HACAT	untreated		0	HACAT	untreated		-2.96059e-16	HACAT	untreated
	-2.07969	HACAT	1h BMP4		-2.02797	HACAT	1h BMP4		-2.68204	HACAT	1h BMP4
