# Supplementary material for: Mutations in SKI in Shprintzen–Goldberg syndrome lead to attenuated TGF-β responses through SKI stabilization
Source: eLife journal article supplement (doi:10.7554/elife.63545), 2021-01-08
Supplement: supp [file elife-63545-supp-v1.zip › elife_poa_e63545_Figure_2_figure_supplement_1_source_data_1.xlsx]

## Sheet: Plotted data
	AVERAGE LUC ASSAY			Experiment 1		Experiment 2		Experiment 3		Experiment 4		Average 4 experiments
		Cell lines	Treatment	LUC/REN		LUC/REN		LUC/REN		LUC/REN		LUC/REN	Stdev	n. experiments
		hacaT	untreated	0.00383677		0.00806228		0.0189695		0.0189695		0.0124595	0.00771247	4
		hacaT	8h TGF-β	0.301355		0.199509		5.06964		5.06964		2.66004	2.78268	4
		SMAD4KO (rescue GFP)	untreated	0.000707713		0.00314089		0.00827846		0.0149284		0.00676386	0.00629169	4
		SMAD4KO (rescue GFP)	8h TGF-β	0.000973435		0.00279426		0.0131965		0.0127641		0.00743207	0.00645193	4
		Rescue GFP SMAD WT	untreated	0.00806228		0.00177657		0.00698778		0.0152293		0.00801397	0.00553838	4
		Rescue GFP SMAD WT	8h TGF-β	0.199509		0.2179		1.14988		1.80786		0.843787	0.781016	4
		Rescue GFP SMad4 D351H	untreated	0.00314089		0.000810145		0.00747849		0.0136013		0.00625771	0.00562167	4
		Rescue GFP SMad4 D351H	8h TGF-β	0.00279426		0.00111206		0.0114201		0.00882522		0.0060379	0.00488269	4
		Rescue GFP SMad4 D537Y	untreated	0.000810145		0.00377967		0.00606543		0.00912156		0.0049442	0.00351918	4
		Rescue GFP SMad4 D537Y	8h TGF-β	0.00111151		0.00872648		0.00815035		0.0107358		0.00718103	0.00419536	4
		Rescue GFP SMad4 A433E	untreated	0.00177657		0.00304923		0.00513838		0.00786733		0.00445788	0.00266215	4
		Rescue GFP SMad4 A433E	8h TGF-β	0.2179		0.201214		1.20072		1.09249		0.67808	0.542848	4
		Rescue GFP SMad4 I435Y	untreated	0.000853832		0.00111634		0.0108361		0.00889111		0.00542434	0.00518825	4
		Rescue GFP SMad4 I435Y	8h TGF-β	0.00139132		0.1882		1.70005		1.77031		0.91499	0.950577	4

## Sheet: Experiment 1
LUC_7	1.09201	Plate 60000 cells x 24 well plate
Experiment 1	2.09.2015	transfect with 200 ng CAGA luc and 50ng TK renilla and 2 ul fugene in prensence
	3.09.2015	treat with TGFB for 8h
	Cell lines		reporter	Treatment	LUC	Ren	LUC/Ren	Average LUC/Ren
1	hacaT		CAGA luc	untreated	1200	340280	0.00352651	0.00383677
2	hacaT		CAGA luc	untreated	840	354520	0.0023694
3	hacaT		CAGA luc	untreated	1440	308040	0.00467472
4	hacaT		CAGA luc	untreated	2000	418720	0.00477646
5	hacaT		CAGA luc	TGFB 8h	104640	275040	0.380454	0.301355
6	hacaT		CAGA luc	TGFB 8h	77840	274280	0.283798
7	hacaT		CAGA luc	TGFB 8h	85920	358280	0.239812
8	hacaT		CAGA luc	TGFB 8h	19960	87480
9	clone5	GFP	CAGA luc	untreated	320	386200	0.000828586	0.000707713
10	clone5	GFP	CAGA luc	untreated	320	339760	0.000941841
11	clone5	GFP	CAGA luc	untreated	240	408000	0.000588235
12	clone5	GFP	CAGA luc	untreated	200	423560	0.000472188
13	clone5	GFP	CAGA luc	TGFB 8h	440	518520	0.000848569	0.000973435
14	clone5	GFP	CAGA luc	TGFB 8h	1520	1217200	0.00124877
15	clone5	GFP	CAGA luc	TGFB 8h	320	413400	0.000774069
16	clone5	GFP	CAGA luc	TGFB 8h	520	508640	0.00102233
17	clone5	GFP SMad4 wt	CAGA luc	untreated	1200	140480	0.00854214	0.00806228
18	clone5	GFP SMad4 wt	CAGA luc	untreated	840	105320	0.00797569
19	clone5	GFP SMad4 wt	CAGA luc	untreated	480	95880	0.00500626
20	clone5	GFP SMad4 wt	CAGA luc	untreated	1000	93240	0.010725
21	clone5	GFP SMad4 wt	CAGA luc	TGFB 8h	26640	122960	0.216656	0.199509
22	clone5	GFP SMad4 wt	CAGA luc	TGFB 8h	26160	109160	0.239648
23	clone5	GFP SMad4 wt	CAGA luc	TGFB 8h	21960	141360	0.155348
24	clone5	GFP SMad4 wt	CAGA luc	TGFB 8h	18400	98720	0.186386
25	clone5	D351H GFP SMad4	CAGA luc	untreated	120	26240	0.00457317	0.00314089
26	clone5	D351H GFP SMad4	CAGA luc	untreated	160	38360	0.00417101
27	clone5	D351H GFP SMad4	CAGA luc	untreated	80	37480	0.00213447
28	clone5	D351H GFP SMad4	CAGA luc	untreated	80	47480	0.00168492
29	clone5	D351H GFP SMad4	CAGA luc	TGFB 8h	200	53000	0.00377358	0.00279426
30	clone5	D351H GFP SMad4	CAGA luc	TGFB 8h	120	45800	0.00262009
31	clone5	D351H GFP SMad4	CAGA luc	TGFB 8h	160	54000	0.00296296
32	clone5	D351H GFP SMad4	CAGA luc	TGFB 8h	120	65920	0.00182039
33	clone5	D537Y GFP Smad4	CAGA luc	untreated	200	200520	0.000997407	0.000810145
34	clone5	D537Y GFP Smad4	CAGA luc	untreated	120	121600	0.000986842
35	clone5	D537Y GFP Smad4	CAGA luc	untreated	120	141440	0.000848416
36	clone5	D537Y GFP Smad4	CAGA luc	untreated	80	196120	0.000407914
37	clone5	D537Y GFP Smad4	CAGA luc	TGFB 8h	80	191520	0.000417711	0.00111151
38	clone5	D537Y GFP Smad4	CAGA luc	TGFB 8h	280	190200	0.00147213
39	clone5	D537Y GFP Smad4	CAGA luc	TGFB 8h	240	192520	0.00124662
40	clone5	D537Y GFP Smad4	CAGA luc	TGFB 8h	200	152720	0.00130959
41	clone5	A433E GFP Smad4	CAGA luc	untreated	360	227560	0.001582	0.00177657
42	clone5	A433E GFP Smad4	CAGA luc	untreated	200	162560	0.00123031
43	clone5	A433E GFP Smad4	CAGA luc	untreated	320	179760	0.00178015
44	clone5	A433E GFP Smad4	CAGA luc	untreated	400	159120	0.00251383
45	clone5	A433E GFP Smad4	CAGA luc	TGFB 8h	33960	164520	0.206419	0.2179
46	clone5	A433E GFP Smad4	CAGA luc	TGFB 8h	35640	179440	0.198618
47	clone5	A433E GFP Smad4	CAGA luc	TGFB 8h	40960	164720	0.248664
48	clone5	A433E GFP Smad4	CAGA luc	TGFB 8h	47800	240720
49	clone5	I435Y GFP Smad4	CAGA luc	untreated	100	207160	0.000482719	0.000853832
50	clone5	I435Y GFP Smad4	CAGA luc	untreated	140	131880	0.00106157
51	clone5	I435Y GFP Smad4	CAGA luc	untreated	160	195080	0.000820176
52	clone5	I435Y GFP Smad4	CAGA luc	untreated	100	95160	0.00105086
53	clone5	I435Y GFP Smad4	CAGA luc	TGFB 8h	1180	603240	0.0019561	0.00139132
54	clone5	I435Y GFP Smad4	CAGA luc	TGFB 8h	870	619040	0.0014054
55	clone5	I435Y GFP Smad4	CAGA luc	TGFB 8h	800	683840	0.00116986
56	clone5	I435Y GFP Smad4	CAGA luc	TGFB 8h	700	677040	0.00103391

## Sheet: Experiment 2
LUC_9	11.07.2016	Plate 60000 cells x 24 well plate
	12.07.2016	transfect with 200 ng CAGA luc and 50ng TK renilla and 2 ul fugene in prensence
	14.07.2016	treat with TGFB for 8h
	Cell lines		reporter	Treatment	LUC	Ren	LUC/Ren	Average LUC/Ren
1	hacaT		CAGA luc	untreated	1200	140480	0.00854214	0.00806228
2	hacaT		CAGA luc	untreated	840	105320	0.00797569
3	hacaT		CAGA luc	untreated	480	95880	0.00500626
4	hacaT		CAGA luc	untreated	1000	93240	0.010725
5	hacaT		CAGA luc	TGFB 8h	26640	122960	0.216656	0.199509
6	hacaT		CAGA luc	TGFB 8h	26160	109160	0.239648
7	hacaT		CAGA luc	TGFB 8h	21960	141360	0.155348
8	hacaT		CAGA luc	TGFB 8h	18400	98720	0.186386
9	clone5	GFP	CAGA luc	untreated	120	26240	0.00457317	0.00314089
10	clone5	GFP	CAGA luc	untreated	160	38360	0.00417101
11	clone5	GFP	CAGA luc	untreated	80	37480	0.00213447
12	clone5	GFP	CAGA luc	untreated	80	47480	0.00168492
13	clone5	GFP	CAGA luc	TGFB 8h	200	53000	0.00377358	0.00279426
14	clone5	GFP	CAGA luc	TGFB 8h	120	45800	0.00262009
15	clone5	GFP	CAGA luc	TGFB 8h	160	54000	0.00296296
16	clone5	GFP	CAGA luc	TGFB 8h	120	65920	0.00182039
17	clone5	GFP SMad4 wt	CAGA luc	untreated	360	227560	0.001582	0.00177657
18	clone5	GFP SMad4 wt	CAGA luc	untreated	200	162560	0.00123031
19	clone5	GFP SMad4 wt	CAGA luc	untreated	320	179760	0.00178015
20	clone5	GFP SMad4 wt	CAGA luc	untreated	400	159120	0.00251383
21	clone5	GFP SMad4 wt	CAGA luc	TGFB 8h	33960	164520	0.206419	0.2179
22	clone5	GFP SMad4 wt	CAGA luc	TGFB 8h	35640	179440	0.198618
23	clone5	GFP SMad4 wt	CAGA luc	TGFB 8h	40960	164720	0.248664
24	clone5	GFP SMad4 wt	CAGA luc	TGFB 8h	47800	240720
25	clone5	D351H GFP SMad4	CAGA luc	untreated	200	200520	0.000997407	0.000810145
26	clone5	D351H GFP SMad4	CAGA luc	untreated	120	121600	0.000986842
27	clone5	D351H GFP SMad4	CAGA luc	untreated	120	141440	0.000848416
28	clone5	D351H GFP SMad4	CAGA luc	untreated	80	196120	0.000407914
29	clone5	D351H GFP SMad4	CAGA luc	TGFB 8h	80	190520	0.000419903	0.00111206
30	clone5	D351H GFP SMad4	CAGA luc	TGFB 8h	280	190200	0.00147213
31	clone5	D351H GFP SMad4	CAGA luc	TGFB 8h	240	192520	0.00124662
32	clone5	D351H GFP SMad4	CAGA luc	TGFB 8h	200	152720	0.00130959
33	clone5	D537Y GFP Smad4	CAGA luc	untreated	280	42680	0.00656045	0.00377967
34	clone5	D537Y GFP Smad4	CAGA luc	untreated	80	43400	0.00184332
35	clone5	D537Y GFP Smad4	CAGA luc	untreated	120	44200	0.00271493
36	clone5	D537Y GFP Smad4	CAGA luc	untreated	160	40000	0.004
37	clone5	D537Y GFP Smad4	CAGA luc	TGFB 8h	240	34800	0.00689655	0.00872648
38	clone5	D537Y GFP Smad4	CAGA luc	TGFB 8h	280	39560	0.00707786
39	clone5	D537Y GFP Smad4	CAGA luc	TGFB 8h	600	49160	0.012205
40
41	clone5	A433E GFP Smad4	CAGA luc	untreated	1000	507160	0.00197176	0.00304923
42	clone5	A433E GFP Smad4	CAGA luc	untreated	1040	231880	0.00448508
43	clone5	A433E GFP Smad4	CAGA luc	untreated	560	195080	0.00287062
44	clone5	A433E GFP Smad4	CAGA luc	untreated	560	195160	0.00286944
45	clone5	A433E GFP Smad4	CAGA luc	TGFB 8h	43400	203240	0.213541	0.201214
46	clone5	A433E GFP Smad4	CAGA luc	TGFB 8h	45080	219040	0.205807
47	clone5	A433E GFP Smad4	CAGA luc	TGFB 8h	34320	183840	0.186684
48	clone5	A433E GFP Smad4	CAGA luc	TGFB 8h	35200	177040	0.198825
49	clone5	I435Y GFP Smad4	CAGA luc	untreated	320	186200	0.00171858	0.00111634
50	clone5	I435Y GFP Smad4	CAGA luc	untreated	320	189760	0.00168634
51	clone5	I435Y GFP Smad4	CAGA luc	untreated	240	408000	0.000588235
52	clone5	I435Y GFP Smad4	CAGA luc	untreated	200	423560	0.000472188
53	clone5	I435Y GFP Smad4	CAGA luc	TGFB 8h	77840	274280	0.283798	0.1882
54	clone5	I435Y GFP Smad4	CAGA luc	TGFB 8h	85920	358280	0.239812
55	clone5	I435Y GFP Smad4	CAGA luc	TGFB 8h	19960	87480	0.228166
56	clone5	I435Y GFP Smad4	CAGA luc	TGFB 8h	520	508640	0.00102233

## Sheet: Experiment 3
LUC_11	11.07.2016	Plate 60000 cells x 24 well plate
	12.07.2016	transfect with 200 ng CAGA luc and 50ng TK renilla and 2 ul fugene in prensence
	14.07.2016	treat with TGFB for 8h
			reporter	Treatment	LUC	Ren	LUC/Ren	Average LUC/Ren
1	hacaT		CAGA luc	untreated	320	18920	0.0169133	0.0189695
2	hacaT		CAGA luc	untreated	480	18920	0.02537
3	hacaT		CAGA luc	untreated	440	27240	0.0161527
4	hacaT		CAGA luc	untreated	240	13760	0.0174419
5	hacaT		CAGA luc	TGFB 8h	90560	22240	4.07194	5.06964
6	hacaT		CAGA luc	TGFB 8h	87080	14600	5.96438
7	hacaT		CAGA luc	TGFB 8h	88920	18080	4.91814
8	hacaT		CAGA luc	TGFB 8h	76880	14440	5.3241
9	clone5	GFP	CAGA luc	untreated	400	50960	0.00784929	0.00827846
10	clone5	GFP	CAGA luc	untreated	360	42680	0.00843486
11	clone5	GFP	CAGA luc	untreated	280	39000	0.00717949
12	clone5	GFP	CAGA luc	untreated	320	33160	0.00965018
13	clone5	GFP	CAGA luc	TGFB 8h	560	43120	0.012987	0.0131965
14	clone5	GFP	CAGA luc	TGFB 8h	760	39400	0.0192893
15	clone5	GFP	CAGA luc	TGFB 8h	520	46800	0.0111111
16	clone5	GFP	CAGA luc	TGFB 8h	400	42560	0.0093985
17	clone5	GFP SMad4 wt	CAGA luc	untreated	560	110760	0.00505598	0.00698778
18	clone5	GFP SMad4 wt	CAGA luc	untreated	760	99400	0.00764588
19	clone5	GFP SMad4 wt	CAGA luc	untreated	480	73200	0.00655738
20	clone5	GFP SMad4 wt	CAGA luc	untreated	800	92040	0.00869187
21	clone5	GFP SMad4 wt	CAGA luc	TGFB 8h	46000	40560	1.13412	1.14988
22	clone5	GFP SMad4 wt	CAGA luc	TGFB 8h	94280	77680	1.2137
23	clone5	GFP SMad4 wt	CAGA luc	TGFB 8h	73880	76520	0.965499
24	clone5	GFP SMad4 wt	CAGA luc	TGFB 8h	153160	119080	1.28619
25	clone5	D351H GFP SMad4	CAGA luc	untreated	360	50840	0.00708104	0.00747849
26	clone5	D351H GFP SMad4	CAGA luc	untreated	200	19880	0.0100604
27	clone5	D351H GFP SMad4	CAGA luc	untreated	240	40680	0.00589971
28	clone5	D351H GFP SMad4	CAGA luc	untreated	160	23280	0.00687285
29	clone5	D351H GFP SMad4	CAGA luc	TGFB 8h	280	26640	0.0105105	0.0114201
30	clone5	D351H GFP SMad4	CAGA luc	TGFB 8h	200	17960	0.0111359
31	clone5	D351H GFP SMad4	CAGA luc	TGFB 8h	320	28360	0.0112835
32	clone5	D351H GFP SMad4	CAGA luc	TGFB 8h	280	21960	0.0127505
49	clone5	D537Y GFP Smad4	CAGA luc	untreated	440	65560	0.00671141	0.00606543
50	clone5	D537Y GFP Smad4	CAGA luc	untreated	400	69720	0.00573723
51	clone5	D537Y GFP Smad4	CAGA luc	untreated	360	65080	0.00553165
52	clone5	D537Y GFP Smad4	CAGA luc	untreated	400	63680	0.00628141
53	clone5	D537Y GFP Smad4	CAGA luc	TGFB 8h	680	58640	0.0115962	0.00815035
54	clone5	D537Y GFP Smad4	CAGA luc	TGFB 8h	440	71720	0.00613497
55	clone5	D537Y GFP Smad4	CAGA luc	TGFB 8h	520	70880	0.00733634
56	clone5	D537Y GFP Smad4	CAGA luc	TGFB 8h	600	79640	0.0075339
33	clone5	A433E GFP Smad4	CAGA luc	untreated	560	121360	0.00461437	0.00513838
34	clone5	A433E GFP Smad4	CAGA luc	untreated	520	100000	0.0052
35	clone5	A433E GFP Smad4	CAGA luc	untreated	520	82680	0.00628931
36	clone5	A433E GFP Smad4	CAGA luc	untreated	440	98880	0.00444984
37	clone5	A433E GFP Smad4	CAGA luc	TGFB 8h	86800	74480	1.16541	1.20072
38	clone5	A433E GFP Smad4	CAGA luc	TGFB 8h	91200	83960	1.08623
39	clone5	A433E GFP Smad4	CAGA luc	TGFB 8h	86560	93040	0.930353
40	clone5	A433E GFP Smad4	CAGA luc	TGFB 8h	159040	98120	1.62087
41	clone5	I435Y GFP Smad4	CAGA luc	untreated	880	98640	0.00892133	0.0108361
42	clone5	I435Y GFP Smad4	CAGA luc	untreated	880	125280	0.00702427
43	clone5	I435Y GFP Smad4	CAGA luc	untreated	440	63520	0.00692695
44	clone5	I435Y GFP Smad4	CAGA luc	untreated	1840	89880	0.0204717
45	clone5	I435Y GFP Smad4	CAGA luc	TGFB 8h	170320	168840	1.00877	1.70005
46	clone5	I435Y GFP Smad4	CAGA luc	TGFB 8h	269840	177040	1.52418
47	clone5	I435Y GFP Smad4	CAGA luc	TGFB 8h	200840	173760	1.15585
48	clone5	I435Y GFP Smad4	CAGA luc	TGFB 8h	356320	114520	3.11142
								#DIV/0!
								#DIV/0!
								#DIV/0!

## Sheet: Experiment 4
LUC_12	31.10.2016	Plate 60000 cells x 24 well plate
	01.11.2016	transfect with 200 ng CAGA luc and 50ng TK renilla and 2 ul fugene in prensence
	02.11.2016	treat with TGFB for 8h
	Cell lines		reporter	Treatment	LUC	Ren	LUC/Ren	Average LUC/Ren
1	hacaT	hacaT	CAGA luc	untreated	320	18920	0.0169133	0.0189695
2	hacaT	hacaT	CAGA luc	untreated	480	18920	0.02537
3	hacaT	hacaT	CAGA luc	untreated	440	27240	0.0161527
4	hacaT	hacaT	CAGA luc	untreated	240	13760	0.0174419
5	hacaT	hacaT	CAGA luc	TGFB 8h	90560	22240	4.07194	5.06964
6	hacaT	hacaT	CAGA luc	TGFB 8h	87080	14600	5.96438
7	hacaT	hacaT	CAGA luc	TGFB 8h	88920	18080	4.91814
8	hacaT	hacaT	CAGA luc	TGFB 8h	76880	14440	5.3241
9	clone5	GFP	CAGA luc	untreated	80	13240	0.0060423	0.0149284
10	clone5	GFP	CAGA luc	untreated	160	12800	0.0125
11	clone5	GFP	CAGA luc	untreated	120	8760	0.0136986
12	clone5	GFP	CAGA luc	untreated	200	7280	0.0274725
13	clone5	GFP	CAGA luc	TGFB 8h	120	11600	0.0103448	0.0127641
14	clone5	GFP	CAGA luc	TGFB 8h	200	16720	0.0119617
15	clone5	GFP	CAGA luc	TGFB 8h	200	11280	0.0177305
16	clone5	GFP	CAGA luc	TGFB 8h	160	14520	0.0110193
17	clone5	GFP SMad4 wt	CAGA luc	untreated	240	10960	0.0218978	0.0152293
18	clone5	GFP SMad4 wt	CAGA luc	untreated	80	8880	0.00900901
19	clone5	GFP SMad4 wt	CAGA luc	untreated	200	10880	0.0183824
20	clone5	GFP SMad4 wt	CAGA luc	untreated	160	13760	0.0116279
21	clone5	GFP SMad4 wt	CAGA luc	TGFB 8h	30400	18760	1.62047	1.80786
22	clone5	GFP SMad4 wt	CAGA luc	TGFB 8h	35320	17040	2.07277
23	clone5	GFP SMad4 wt	CAGA luc	TGFB 8h	31680	16920	1.87234
24	clone5	GFP SMad4 wt	CAGA luc	TGFB 8h	27720	16640	1.66587
25	clone5	D351H GFP SMad4	CAGA luc	untreated	200	8600	0.0232558	0.0136013
26	clone5	D351H GFP SMad4	CAGA luc	untreated	160	11600	0.0137931
27	clone5	D351H GFP SMad4	CAGA luc	untreated	120	11720	0.0102389
28	clone5	D351H GFP SMad4	CAGA luc	untreated	80	11240	0.00711744
29	clone5	D351H GFP SMad4	CAGA luc	TGFB 8h	200	16160	0.0123762	0.00882522
30	clone5	D351H GFP SMad4	CAGA luc	TGFB 8h	120	16400	0.00731707
31	clone5	D351H GFP SMad4	CAGA luc	TGFB 8h	160	18680	0.00856531
32	clone5	D351H GFP SMad4	CAGA luc	TGFB 8h	120	17040	0.00704225
33	clone5	D537Y GFP Smad4	CAGA luc	untreated	120	17000	0.00705882	0.00912156
34	clone5	D537Y GFP Smad4	CAGA luc	untreated	200	19560	0.0102249
35	clone5	D537Y GFP Smad4	CAGA luc	untreated	120	12000	0.01
36	clone5	D537Y GFP Smad4	CAGA luc	untreated	120	13040	0.00920245
37	clone5	D537Y GFP Smad4	CAGA luc	TGFB 8h	440	27760	0.0158501	0.0107358
38	clone5	D537Y GFP Smad4	CAGA luc	TGFB 8h	280	31880	0.00878294
39	clone5	D537Y GFP Smad4	CAGA luc	TGFB 8h	240	27520	0.00872093
40	clone5	D537Y GFP Smad4	CAGA luc	TGFB 8h	280	29200	0.00958904
41	clone5	A433E GFP Smad4	CAGA luc	untreated	200	23280	0.00859107	0.00786733
42	clone5	A433E GFP Smad4	CAGA luc	untreated	160	23480	0.00681431
43	clone5	A433E GFP Smad4	CAGA luc	untreated	240	23160	0.0103627
44	clone5	A433E GFP Smad4	CAGA luc	untreated	200	35080	0.00570125
45	clone5	A433E GFP Smad4	CAGA luc	TGFB 8h	54640	49520	1.10339	1.09249
46	clone5	A433E GFP Smad4	CAGA luc	TGFB 8h	52040	39640	1.31282
47	clone5	A433E GFP Smad4	CAGA luc	TGFB 8h	56680	44000	1.28818
48	clone5	A433E GFP Smad4	CAGA luc	TGFB 8h	32320	48560	0.665568
49	clone5	I435Y GFP Smad4	CAGA luc	untreated	120	9560	0.0125523	0.00889111
50	clone5	I435Y GFP Smad4	CAGA luc	untreated	160	17800	0.00898876
51	clone5	I435Y GFP Smad4	CAGA luc	untreated	80	12520	0.00638978
52	clone5	I435Y GFP Smad4	CAGA luc	untreated	120	15720	0.00763359
53	clone5	I435Y GFP Smad4	CAGA luc	TGFB 8h	68640	32400	2.11852	1.77031
54	clone5	I435Y GFP Smad4	CAGA luc	TGFB 8h	55160	39640	1.39152
55	clone5	I435Y GFP Smad4	CAGA luc	TGFB 8h	84240	40760	2.06673
56	clone5	I435Y GFP Smad4	CAGA luc	TGFB 8h	53680	35680	1.50448
