# Supplementary material for: Mutations in SKI in Shprintzen–Goldberg syndrome lead to attenuated TGF-β responses through SKI stabilization
Source: eLife journal article supplement (doi:10.7554/elife.63545), 2021-01-08
Supplement: supp [file elife-63545-supp-v1.zip › elife_poa_e63545_Figure_2_figure_supplement_1_source_data_2.xlsx]

## Sheet: SERPINE-1
qPCR rescue clones
		Cell lines	Treatment	Experiment 1		Experiment 2		Experiment 3		Experiment 4		average	stdev	n. experiments
		Rescue GFP SMAD WT	SB-431542	1.36347		2.09014		1.05772		2.21978		1.68278	0.561832	4
		Rescue GFP SMAD WT	6h TGF-β	18.6644		7.21129		5.71796		5.94942		9.38575	6.22044	4
		Rescue GFP SMad4 D351H	SB-431542	1.22148		1.79118		1.43036		1.73684		1.54496	0.26784	4
		Rescue GFP SMad4 D351H	6h TGF-β	2.52878		3.58045		2.51172		1.4458		2.51669	0.871504	4
		Rescue GFP SMad4 A433E	SB-431542	1.20696		1.12487		1.64694		1.32185		1.32516	0.229231	4
		Rescue GFP SMad4 A433E	6h TGF-β	10.8778		2.24697		5.47257		1.33495		4.98309	4.31212	4
		Rescue GFP SMad4 I435Y	SB-431542	1.3506		1.78575		1.88824		1.73205		1.68916	0.234822	4
		Rescue GFP SMad4 I435Y	6h TGF-β	21.722		9.13085		7.5647		5.6845		11.0255	7.26884	4
		Rescue GFP SMad4 D537Y	SB-431542	1.3382		0.863208		1.44756		2.78399		1.60824	0.823853	4
		Rescue GFP SMad4 D537Y	6h TGF-β	3.55558		1.217		1.87747		5.44318		3.02331	1.88987	4
		SMAD4KO (rescue GFP)	SB-431542	1.54154		1.65113		1.75908		1.36042		1.57804	0.170109	4
		SMAD4KO (rescue GFP)	6h TGF-β	3.12744		1.74147		2.19804		1.75683		2.20594	0.649784	4
		HaCaT	SB-431542	1		1.00017		1		1		1.00004	8.53551e-05	4
		HaCaT	6h TGF-β	40.0905		15.1732		29.7084		9.49969		23.618	13.8934	4
		Cell lines	Treatment	delta delta CT vs parental		delta delta CT vs parental		delta delta CT vs parental		delta delta CT vs parental
		Rescue GFP SMAD WT	SB-431542	-0.444758		-0.397917		0.548529		-0.674645
		Rescue GFP SMAD WT	6h TGF-β	-4.2218		-4.29074		-1.91411		-2.46294
		Rescue GFP SMad4 D351H	SB-431542	-0.219499		-0.305109		0.11997		-0.7963
		Rescue GFP SMad4 D351H	6h TGF-β	-1.24409		-1.59841		-0.683892		-0.531273
		Rescue GFP SMad4 A433E	SB-431542	-0.227357		-0.419286		-0.0931816		-0.308927
		Rescue GFP SMad4 A433E	6h TGF-β	-3.44258		-2.52077		-1.80994		-0.292848
		Rescue GFP SMad4 I435Y	SB-431542	-0.423939		-0.68384		-0.292366		-0.790928
		Rescue GFP SMad4 I435Y	6h TGF-β	-4.42583		-3.06047		-2.31578		-2.21854
		Rescue GFP SMad4 D537Y	SB-431542	-0.409921		-0.136179		0.102575		-1.47664
		Rescue GFP SMad4 D537Y	6h TGF-β	-1.81405		-2.22198		-0.305953		-2.04161
		SMAD4KO (rescue GFP)	SB-431542	-0.933522		3.45212		-0.202347		-0.499927
		SMAD4KO (rescue GFP)	6h TGF-β	-1.49837		2.78644		-0.449138		-0.812855
		HaCaT	SB-431542	0		0		0.201187		0
		HaCaT	6h TGF-β	-5.3101		-6.29383		-4.29079		-3.24647

## Sheet: SKIL
average for rescue clones
					Experiment 1		Experiment 2		Experiment 3		Experiment 4		average	stdev	n. experiments
			Cell lines	Treatment									average	stdev	n. experiments
			Rescue GFP SMAD WT	SB-431542	0.953798		2.09014		1.95681		1.67491		1.66891	0.507195	4
			Rescue GFP SMAD WT	6h TGF-β	6.14219		7.21129		5.2762		6.3195		6.2373	0.793342	4
			Rescue GFP SMad4 D351H	SB-431542	0.753383		1.79118		2.247		1.48069		1.56806	0.627714	4
			Rescue GFP SMad4 D351H	6h TGF-β	1.09085		3.58045		1.87644		0.394395		1.73553	1.37087	4
			Rescue GFP SMad4 A433E	SB-431542	0.979965		1.12487		3.42832		0.874046		1.6018	1.22201	4
			Rescue GFP SMad4 A433E	6h TGF-β	4.23546		3.40087		7.64491		0.5848		3.96651	2.9074	4
			Rescue GFP SMad4 I435Y	SB-431542	1.2242		1.78575		0.407254		1.32691		1.18603	0.573719	4
			Rescue GFP SMad4 I435Y	6h TGF-β	5.55766		9.13085		6.37754		4.2234		6.32236	2.07212	4
			Rescue GFP SMad4 D537Y	SB-431542	1.23709		0.863208		0.790589		1.1599		1.0127	0.218861	4
			Rescue GFP SMad4 D537Y	6h TGF-β	2.05105		1.217		2.18102		4.21307		2.41553	1.2722	4
			SMAD4KO (rescue GFP)	SB-431542	0.927656		1.65113		0.0510835		0.281893		0.727942	0.718625	4
			SMAD4KO (rescue GFP)	6h TGF-β	1.42082		1.74147		3.44022		0.508665		1.77779	1.22517	4
			HaCaT	SB-431542	1		1.00017		1		1		1.00004	8.53551e-05	4
			HaCaT	6h TGF-β	5.15175		15.1732		10.7369		14.7695		11.4578	4.65681	4
					delta delta CT vs parental		delta delta CT vs parental		delta delta CT vs parental average expression		delta delta CT vs parental
			Rescue GFP SMAD WT	SB-431542	0.0729532		-0.561909		-0.9685		-0.534646
			Rescue GFP SMAD WT	6h TGF-β	-2.59968		-2.84761		-2.3995		-2.49101
			Rescue GFP SMad4 D351H	SB-431542	0.567286		-0.79525		-1.168		0.25348
			Rescue GFP SMad4 D351H	6h TGF-β	0.0559692		-1.80645		-0.908		1.36069
			Rescue GFP SMad4 A433E	SB-431542	0.08918		-0.132026		-1.7775		0.204102
			Rescue GFP SMad4 A433E	6h TGF-β	-2.07194		-1.76577		-2.9345		0.823792
			Rescue GFP SMad4 I435Y	SB-431542	-0.266857		-0.584555		1.296		-0.326486
			Rescue GFP SMad4 I435Y	6h TGF-β	-2.3893		-2.09706		-2.673		-1.85092
			Rescue GFP SMad4 D537Y	SB-431542	-0.272995		0.322787		0.339		-0.193574
			Rescue GFP SMad4 D537Y	6h TGF-β	-1.00021		-0.270874		-1.125		-1.40846
			SMAD4KO (rescue GFP)	SB-431542	0.138544		-0.609494		4.291		0.281893
			SMAD4KO (rescue GFP)	6h TGF-β	-0.504962		-0.791328		-1.7825		0.508665
			HaCaT	SB-431542	0		0		0		0
			HaCaT	6h TGF-β	-2.34541		-3.76212		-3.4245		-3.85278

## Sheet: CDKN1A
				Experiment 1		Experiment 2		Experiment 3		Experiment 4		average	stdev	n. experiments
		Cell lines	Treatment									average	stdev	n. experiments
		Rescue GFP SMAD WT	SB-431542	1.56131		0.823522		1.01568		1.60784		1.25209	0.392315	4
		Rescue GFP SMAD WT	6h TGF-β	8.60917		6.7007		4.20338		4.96932		6.12064	1.9605	4
		Rescue GFP SMad4 D351H	SB-431542	0.68223		2.04664		0.311467		1.16571		1.05151	0.749969	4
		Rescue GFP SMad4 D351H	6h TGF-β	1.51879		1.9427		2.43952		0.489783		1.5977	0.828935	4
		Rescue GFP SMad4 A433E	SB-431542	0.555796		2.15855		1.43622		2.0406		1.54779	0.733119	4
		Rescue GFP SMad4 A433E	6h TGF-β	5.27201		5.96904		1.63275		5.12592		4.49993	1.94653	4
		Rescue GFP SMad4 I435Y	SB-431542	1.20397		2.15192		0.682398		0.872119		1.2276	0.652822	4
		Rescue GFP SMad4 I435Y	6h TGF-β	11.4312		7.78826		1.65554		4.1698		6.2612	4.26798	4
		Rescue GFP SMad4 D537Y	SB-431542	1.77441		1.94219		0.63015		0.847084		1.29846	0.656072	4
		Rescue GFP SMad4 D537Y	6h TGF-β	4.39294		3.70216		0.21035		0.893543		2.29975	2.05679	4
		SMAD4KO (rescue GFP)	SB-431542	1.11613		2.38362		1.85046		1.22332		1.64338	0.590275	4
		SMAD4KO (rescue GFP)	6h TGF-β	2.46057		1.34714		1.1787		1.56517		1.63789	0.570813	4
		HaCaT	SB-431542	1.01456		1.01939		1.04014		1		1.01852	0.0166014	4
		HaCaT	6h TGF-β	11.5533		12.196		8.64979		4.99985		9.34973	3.28473	4
				delta delta CT vs parental		delta delta CT vs parental		delta delta CT vs parental		delta delta CT vs parental
		Rescue GFP SMAD WT	SB-431542	-0.61047		0.411186		0.228147		-0.645722
		Rescue GFP SMAD WT	6h TGF-β	-3.07299		-2.74092		-2.05052		-2.30551
		Rescue GFP SMad4 D351H	SB-431542	0.710547		-0.781669		1.75945		-0.219853
		Rescue GFP SMad4 D351H	6h TGF-β	-0.418525		-0.901781		-0.962874		1.08223
		Rescue GFP SMad4 A433E	SB-431542	1.08453		-1.0431		-0.325682		1.12414
		Rescue GFP SMad4 A433E	6h TGF-β	-2.39821		-2.54988		-0.699684		0.164905
		Rescue GFP SMad4 I435Y	SB-431542	-0.231337		-1.10513		0.824885		-1.0284
		Rescue GFP SMad4 I435Y	6h TGF-β	-3.41452		-2.86525		-0.701074		-2.23366
		Rescue GFP SMad4 D537Y	SB-431542	-0.8085		-0.798832		0.748344		0.20273
		Rescue GFP SMad4 D537Y	6h TGF-β	-1.50322		-1.5454		2.36396		-2.04679
		SMAD4KO (rescue GFP)	SB-431542	-1.70896		-1.07443		-0.880014		0.0772858
		SMAD4KO (rescue GFP)	6h TGF-β	-1.19527		-0.293788		0.179362		-0.550158
		HaCaT	SB-431542	0		0		0		0
		HaCaT	6h TGF-β	-3.41587		-3.55974		-2.34763		-2.31936
