# Supplementary material for: Mutations in SKI in Shprintzen–Goldberg syndrome lead to attenuated TGF-β responses through SKI stabilization
Source: eLife journal article supplement (doi:10.7554/elife.63545), 2021-01-08
Supplement: supp [file elife-63545-supp-v1.zip › elife_poa_e63545_Figure_2_source_data_1.xlsx]

## Sheet: Average for densitometry
	Experiment 1				Experiment 2				Experiment 3				Experiment 4				Experiment 5				AVERAGE	STDEV	n. experiments
	Normalised SKIL level	Cell lines	Treatment		Normalised SKIL level	Cell lines	Treatment		Normalised SKIL level	Cell lines	Treatment		Normalised SKIL level	Cell lines	Treatment		Normalised SKIL level	Cell lines	Treatment		average Normalised SKIL level	STDEV	n. experiments	Cell lines	Treatment
	100	SMAD4KO (rescue GFP)	SB-431542		100	SMAD4KO (rescue GFP)	SB-431542		100	SMAD4KO (rescue GFP)	SB-431542		100	SMAD4KO (rescue GFP)	SB-431542		100	SMAD4KO (rescue GFP)	SB-431542		100	0	5	SMAD4KO (rescue GFP)	SB-431542
	114.353	SMAD4KO (rescue GFP)	1h TGF-β		102.562	SMAD4KO (rescue GFP)	1h TGF-β		131.728	SMAD4KO (rescue GFP)	1h TGF-β		134.259	SMAD4KO (rescue GFP)	1h TGF-β		195.857	SMAD4KO (rescue GFP)	1h TGF-β		135.752	36.0225	5	SMAD4KO (rescue GFP)	1h TGF-β
	54.9656	Rescue GFP SMAD WT	SB-431542		91.302	Rescue GFP SMAD WT	SB-431542		123.935	Rescue GFP SMAD WT	SB-431542		103.345	Rescue GFP SMAD WT	SB-431542		198.071	Rescue GFP SMAD WT	SB-431542		114.324	53.1035	5	Rescue GFP SMAD WT	SB-431542
	18.0993	Rescue GFP SMAD WT	1h TGF-β		65.4268	Rescue GFP SMAD WT	1h TGF-β		83.7239	Rescue GFP SMAD WT	1h TGF-β		55.6972	Rescue GFP SMAD WT	1h TGF-β		48.5297	Rescue GFP SMAD WT	1h TGF-β		54.2954	24.1626	5	Rescue GFP SMAD WT	1h TGF-β
	45.1702	Rescue GFP SMad4 D351H	SB-431542		104.259	Rescue GFP SMad4 D351H	SB-431542		38.3838	Rescue GFP SMad4 D351H	SB-431542		138.725	Rescue GFP SMad4 D351H	SB-431542		166.089	Rescue GFP SMad4 D351H	SB-431542		98.5255	56.2972	5	Rescue GFP SMad4 D351H	SB-431542
	59.8469	Rescue GFP SMad4 D351H	1h TGF-β		119.809	Rescue GFP SMad4 D351H	1h TGF-β		36.4414	Rescue GFP SMad4 D351H	1h TGF-β		143.869	Rescue GFP SMad4 D351H	1h TGF-β		181.143	Rescue GFP SMad4 D351H	1h TGF-β		108.222	59.6133	5	Rescue GFP SMad4 D351H	1h TGF-β
	60.8364	Rescue GFP SMad4 D537Y	SB-431542		220.631	Rescue GFP SMad4 D537Y	SB-431542		59.4501	Rescue GFP SMad4 D537Y	SB-431542		84.2777	Rescue GFP SMad4 D537Y	SB-431542		227.617	Rescue GFP SMad4 D537Y	SB-431542		130.562	86.0128	5	Rescue GFP SMad4 D537Y	SB-431542
	73.2143	Rescue GFP SMad4 D537Y	1h TGF-β		130.22	Rescue GFP SMad4 D537Y	1h TGF-β		205.738	Rescue GFP SMad4 D537Y	1h TGF-β		132.43	Rescue GFP SMad4 D537Y	1h TGF-β		212.759	Rescue GFP SMad4 D537Y	1h TGF-β		150.872	58.3901	5	Rescue GFP SMad4 D537Y	1h TGF-β
	91.5003	Rescue GFP SMad4 A433E	SB-431542		189.754	Rescue GFP SMad4 A433E	SB-431542		96.8522	Rescue GFP SMad4 A433E	SB-431542		251.42	Rescue GFP SMad4 A433E	SB-431542		360.334	Rescue GFP SMad4 A433E	SB-431542		197.972	112.746	5	Rescue GFP SMad4 A433E	SB-431542
	84.9293	Rescue GFP SMad4 A433E	1h TGF-β		115.834	Rescue GFP SMad4 A433E	1h TGF-β		85.052	Rescue GFP SMad4 A433E	1h TGF-β		184.925	Rescue GFP SMad4 A433E	1h TGF-β		287.71	Rescue GFP SMad4 A433E	1h TGF-β		151.69	86.2979	5	Rescue GFP SMad4 A433E	1h TGF-β
	92.8458	Rescue GFP SMad4 I435Y	SB-431542		74.6482	Rescue GFP SMad4 I435Y	SB-431542		80.6131	Rescue GFP SMad4 I435Y	SB-431542		109.14	Rescue GFP SMad4 I435Y	SB-431542		367.333	Rescue GFP SMad4 I435Y	SB-431542		144.916	125.033	5	Rescue GFP SMad4 I435Y	SB-431542
	62.0319	Rescue GFP SMad4 I435Y	1h TGF-β		94.9722	Rescue GFP SMad4 I435Y	1h TGF-β		52.6819	Rescue GFP SMad4 I435Y	1h TGF-β		141.102	Rescue GFP SMad4 I435Y	1h TGF-β		206.851	Rescue GFP SMad4 I435Y	1h TGF-β		111.528	63.5373	5	Rescue GFP SMad4 I435Y	1h TGF-β

## Sheet: Experiment 1
wb119	19.04.2016	plate 250000 cells in 6 well plates			Do.4 lysates
Experiment 1	20.04.2015	treat with SB over night
	21.042	wash out SB and treat with TGFbeta I left for 1h and 10min
	Cell lines		Treatment	SKIL	MCM6	SKIL/MCM6	% to SB S4KO
1	clone5 CRISPR Smad4 knockout		SB	36228.2	48933.6	0.740355	100
2	clone5 CRISPR Smad4 knockout		TGFB	38430.4	45393.1	0.846614	114.353
3	clone5	GFP SMad4 wt	SB	15773.1	38760.1	0.40694	54.9656
4	clone5	GFP SMad4 wt	TGFB	3675.54	27429.7	0.133999	18.0993
5	clone5	D351H GFP SMad4 wt	SB	11432.1	34184.9	0.33442	45.1702
6	clone5	D351H GFP SMad4 wt	TGFB	16335.6	36868.2	0.44308	59.8469
7	clone5	A433E GFP Smad4	SB	23391.9	34530.6	0.677427	91.5003
8	clone5	A433E GFP Smad4	TGFB	21349.3	33953.7	0.628778	84.9293
9	clone5	I435Y GFP Smad4	SB	23482.2	34161.5	0.687388	92.8458
10	clone5	I435Y GFP Smad4	TGFB	15657.6	34093.4	0.459256	62.0319
11	clone5	D537Y GFP Smad4	SB	15436.9	34273.4	0.450405	60.8364
12	clone5	D537Y GFP Smad4	TGFB	17976.6	33164.3	0.542046	73.2143
13	clone5	GFP	SB	27751.2	28567.8	0.971416	1
14	clone5	GFP	TGFB	30452.2			0

## Sheet: Experiment 2
wb120		25.04.2016	plate 250000 cells in 6 well plates
Experiment 1		26.04.2016	treat with SB o/n
		27.04.2016	wash out SB and then Treat TGFB and wb
			Cell lines		Treatment	SKIL	MCM6	SKIL/MCM6	% to SB S4KO
		1	clone5 CRISPR Smad4 knockout		SB	13388.9	11406.4	1.17381	100
		2	clone5 CRISPR Smad4 knockout		TGFB	16156	13419.9	1.20389	102.562
		3	clone5	GFP SMad4 wt	SB	11702.1	10919.1	1.07171	91.302
		4	clone5	GFP SMad4 wt	TGFB	7407.81	9645.76	0.767986	65.4268
		5	clone5	D351H GFP SMad4 wt	SB	13954.8	11402.8	1.22381	104.259
		6	clone5	D351H GFP SMad4 wt	TGFB	13280.6	9443.47	1.40633	119.809
		7	clone5	A433E GFP Smad4	SB	18258.4	7050.15	2.58979	220.631
		8	clone5	A433E GFP Smad4	TGFB	12445.9	8142.4	1.52853	130.22
		9	clone5	I435Y GFP Smad4	SB	14578.3	6545.15	2.22735	189.754
		10	clone5	I435Y GFP Smad4	TGFB	14534	10689.3	1.35968	115.834
		11	clone5	D537Y GFP Smad4	SB	10731.9	12247.8	0.876227	74.6482
		12	clone5	D537Y GFP Smad4	TGFB	11972	10739.2	1.11479	94.9722
		13	clone5	GFP	SB	12682.4	4019.91	3.15489	268.773
		14	clone5	GFP	TGFB	18484.5	2072.08	8.92071	759.98

## Sheet: Experiment 3
wb121		3.05.2016	Plate 2500000 cells in 6 well plate
Experiment 3		4.05.2016	Add SB overnight
		5.5.2016	wash out SB and treate TGFB
			Cell lines		Treatment	SKIL	MCM6	SKIL/MCM6	% to SB S4KO
		1	clone5 CRISPR Smad4 knockout		SB	13186.6	7435.62	1.77343	100
		2	clone5 CRISPR Smad4 knockout		TGFB	13911.3	5954.91	2.3361	131.728
		3	clone5	GFP SMad4 wt	SB	14194.9	6458.38	2.1979	123.935
		4	clone5	GFP SMad4 wt	TGFB	10561.6	7113.2	1.48479	83.7239
		5	clone5	D351H GFP SMad4 wt	SB	7735.93	11364.5	0.680711	38.3838
		6	clone5	D351H GFP SMad4 wt	TGFB	6716.47	10392.8	0.646263	36.4414
		7	clone5	A433E GFP Smad4	SB	15941.9	9281.47	1.71761	96.8522
		8	clone5	A433E GFP Smad4	TGFB	17769	11780.5	1.50834	85.052
		9	clone5	I435Y GFP Smad4	SB	11177.5	7818.52	1.42962	80.6131
		10	clone5	I435Y GFP Smad4	TGFB	8667.08	9276.76	0.934278	52.6819
		11	clone5	D537Y GFP Smad4	SB	4223.15	4005.62	1.05431	59.4501
		12	clone5	D537Y GFP Smad4	TGFB	4611.08	1263.79	3.64861	205.738

## Sheet: Experiment 4
wb142	16.1.2017	plate 250000 cells in 10cm dishes
Experiment 4	17.1.2017	treat SB overnight
	18.1.2017	treat TGFB
			Cell lines		Treatment	SKIL	MCM6	SKIL/MCM6	% to SB S4KO
		1	clone5	GFP	SB	16259.5	14258.1	1.14036	100
		2	clone5	GFP	TGFB	18441.7	12045.1	1.53105	134.259
		3	clone5	GFP SMad4 wt	SB	12840.5	10895.6	1.17851	103.345
		4	clone5	GFP SMad4 wt	TGFB	7444	11720	0.635151	55.6972
		5	clone5	D351H GFP SMad4 wt	SB	16451.2	10399.1	1.58197	138.725
		6	clone5	D351H GFP SMad4 wt	TGFB	16315.5	9944.63	1.64063	143.869
		7	clone5	A433E GFP Smad4	SB	18986.4	19755.4	0.961073	84.2777
		8	clone5	A433E GFP Smad4	TGFB	21969.6	14547.6	1.51018	132.43
		9	clone5	I435Y GFP Smad4	SB	17516.1	6109.35	2.8671	251.42
		10	clone5	I435Y GFP Smad4	TGFB	15530.5	7364.56	2.10882	184.925
		11	clone5	D537Y GFP Smad4	SB	20232.6	16256.3	1.2446	109.14
		12	clone5	D537Y GFP Smad4	TGFB	14500.9	9011.97	1.60907	141.102

## Sheet: Experiment 5
wb151	27.3.2017	plate 250000 cellsin 6well plate from GFP positive FACS sorted cells
Experiment 5	28.3.2017	treat SB overnight
	29.3.2017	treat TGFB
	Cell lines		Treatment	SKIL	MCM6	SKIL/MCM6	% to SB S4KO
1	clone5	GFP	SB	4997.33	15216.9	0.328406	100
2	clone5	GFP	TGFB	10126.2	15743.4	0.643205	195.857
3	clone5	GFP SMad4 wt	SB	13065.8	20086.5	0.650477	198.071
4	clone5	GFP SMad4 wt	TGFB	3048.01	19124.9	0.159374	48.5297
5	clone5	D351H GFP SMad4 wt	SB	9748.52	17872.6	0.545445	166.089
6	clone5	D351H GFP SMad4 wt	TGFB	9178.93	15429.8	0.594883	181.143
7	clone5	D537Y GFP Smad4	SB	8717.57	11662.2	0.747507	227.617
8	clone5	D537Y GFP Smad4	TGFB	7012.23	10035.9	0.698714	212.759
9	clone5	A433E GFP Smad4	SB	17141.8	14485.8	1.18336	360.334
10	clone5	A433E GFP Smad4	TGFB	15592.1	16502.1	0.944857	287.71
11	clone5	I435Y GFP Smad4	SB	12166.1	10085.1	1.20634	367.333
12	clone5	I435Y GFP Smad4	TGFB	5070.91	7464.78	0.679311	206.851
