# Supplementary material for: Mutations in SKI in Shprintzen–Goldberg syndrome lead to attenuated TGF-β responses through SKI stabilization
Source: eLife journal article supplement (doi:10.7554/elife.63545), 2021-01-08
Supplement: supp [file elife-63545-supp-v1.zip › elife_poa_e63545_Figure_2_source_data_2.xlsx]

## Sheet: Flow cytometry plotted values
	1h TGF-β	SB-431542	1h TGF-β	SB-431542	1h TGF-β	SB-431542	1h TGF-β	SB-431542	1h TGF-β	SB-431542	1h TGF-β	SB-431542
	SMAD4KO (rescue GFP)	SMAD4KO (rescue GFP)	Rescue GFP SMAD WT	Rescue GFP SMAD WT	Rescue GFP SMAD4 D351H	Rescue GFP SMAD4 D351H	Rescue GFP SMAD4 D537Y	Rescue GFP SMAD4 D537Y	Rescue GFP SMAD4 A433E	Rescue GFP SMAD4 A433E	Rescue GFP SMAD4 I435Y	Rescue GFP SMAD4 I435Y
Experiment 1	1161	779	519	892	805	628	738	710	958	851	1418	1082
Experiment 2	1258	851	613	1097	994	848	974	1376	1860	1332	1400	1413
Experiment 3	1123	1209	359	810	708	717	816	846	1022	1127	1014	1484
Experiment4	437	525	148	345	310	313	384	380	401	531	537	681
Experiment 1 normalised 100% SB S4KO	149.037	100	66.6239	114.506	103.338	80.6162	94.7368	91.1425	122.978	109.243	182.028	138.896
Experiment 2 normalised 100% SB S4KO	147.826	100	72.0329	128.907	116.804	99.6475	114.454	161.692	218.566	156.522	164.512	166.04
Experiment 3 normalised 100% SB S4KO	92.8867	100	29.694	66.9975	58.5608	59.3052	67.4938	69.9752	84.5327	93.2175	83.871	122.746
Experiment 4 normalised 100% SB S4KO	83.2381	100	28.1905	65.7143	59.0476	59.619	73.1429	72.381	76.381	101.143	102.286	129.714
	SMAD4KO (rescue GFP)	SMAD4KO (rescue GFP)	Rescue GFP SMAD WT	Rescue GFP SMAD WT	Rescue GFP SMAD4 D351H	Rescue GFP SMAD4 D351H	Rescue GFP SMAD4 D537Y	Rescue GFP SMAD4 D537Y	Rescue GFP SMAD4 A433E	Rescue GFP SMAD4 A433E	Rescue GFP SMAD4 I435Y	Rescue GFP SMAD4 I435Y
average 4 experiments	118.247	100	49.1353	94.0312	84.4374	74.797	87.4568	98.7977	125.615	115.031	133.174	139.349
stdev	35.0796	2.82385	23.4293	32.4972	30.1056	19.3371	21.4883	42.9841	65.2142	28.4235	47.4472	18.9833
n ex	4	4	4	4	4	4	4	4	4	4	4	4
Cell line	Treatment	Average	STDEV	N. Experiments
SMAD4KO (rescue GFP)	SB-431542	100	2.82385	4
SMAD4KO (rescue GFP)	1h TGF-β	118.247	35.0796	4
Rescue GFP SMAD WT	SB-431542	94.0312	32.4972	4
Rescue GFP SMAD WT	1h TGF-β	49.1353	23.4293	4
Rescue GFP SMAD4 D351H	SB-431542	74.797	19.3371	4
Rescue GFP SMAD4 D351H	1h TGF-β	84.4374	30.1056	4
Rescue GFP SMAD4 D537Y	SB-431542	98.7977	42.9841	4
Rescue GFP SMAD4D537Y	1h TGF-β	87.4568	21.4883	4
Rescue GFP SMAD4 A433E	SB-431542	115.031	28.4235	4
Rescue GFP SMAD4 A433E	1h TGF-β	125.615	65.2142	4
Rescue GFP SMAD4 I435Y	SB-431542	139.349	18.9833	4
Rescue GFP SMAD4 I435Y	1h TGF-β	133.174	47.4472	4
