# Supplementary material for: Mutations in SKI in Shprintzen–Goldberg syndrome lead to attenuated TGF-β responses through SKI stabilization
Source: eLife journal article supplement (doi:10.7554/elife.63545), 2021-01-08
Supplement: supp [file elife-63545-supp-v1.zip › elife_poa_e63545_Figure_4_figure_supplement_1.pdf]

|            |                                                                                                                                                                                 |
|------------|---------------------------------------------------------------------------------------------------------------------------------------------------------------------------------|
| Human SKI  | MENLQTNFSLVQGSTKKLNMGDDGSPPAKMITDIHANGKTINKVPTVKKEHLDDYGEA                                                                                                                      |
| Human SKI  | -----MEAAAGGR-----                                                                                                                                                              |
| Mouse SKI  | -----MEAAAAGR-----<br>:<br>*: * *                                                                                                                                               |
|            | <div style="display: flex; justify-content: space-around; align-items: center;"> <span>↓ 21</span> <span>↓ 28</span> <span>↓ 31 ↓ 32</span> <span>↓ 34 ↓ 35 (SKI)</span> </div> |
| Human SKIL | PVETDGEHVKRTCTSVPETLHLNPSLKHTLAQFHLSSQSSLGGPAAFSAARHSQEESM----                                                                                                                  |
| Human SKI  | -----GCFQPHPGLQKTLEQFHLSSMSLGGPAAFSAARWAQEAYKKES                                                                                                                                |
| Mouse SKI  | -----GGFQPHPGLQKTLEQFHLSSMSLGGPAAFSAARWAQEAYKKES<br>:<br>:* . *: : **       *****       ***** . : : :                                                                           |
|            | 94 ▴ 97 (SKI)                                                                                                                                                                   |
| Human SKIL | -----SPTVFLLPL--PSPQVLPGPLLIPSDSSTELTQTVTLEGESIS                                                                                                                                |
| Human SKI  | AKEAGAAAVPAPVPAATEPPPVHLPAIQPPPVLPGPFFMPSPDRSTERCETVLEGETIS                                                                                                                     |
| Mouse SKI  | AKEAGAATVPAPVPTAAEPPPVHLPAIQPPPVLPGPFFMPSPDRSTERCETVLEGETIS<br>.*.:.**       *. *       *****: : ***       ***       :*****:**                                                  |
|            | <div style="display: flex; justify-content: center; align-items: center;"> <span>↓ 116</span> <span>↓ 117 (SKI)</span> </div>                                                   |
| Human SKIL | CFQVGGEKRLCLPQVLNSVLREFTLQQINTVCDELYIYCSRCTSDQLHILKVLGILPFNA                                                                                                                    |
| Human SKI  | CFVVGGEKRLCLPQILNSVLRDFSLQQINAVCDELHIYCSRCTADQLEILKVMGILPFS                                                                                                                     |
| Mouse SKI  | CFVVGGEKRLCLPQILNSVLRDFSLQQINSVCDELHIYCSRCTADQLEILKVMGILPFS<br>**       *****:*****: : *****:*****:***       *****:****.                                                        |
| Human SKIL | PSCGLITLTDAQRCLNALLRPRTFPQNGSVLPKSSLAQLKETGSFAFEVEHECLGKCQGL                                                                                                                    |
| Human SKI  | PSCGLITKTDAERLCNALLYGGAYPPPCCKELAASLALGLELSERSVRVYHECFGKCKGL                                                                                                                    |
| Mouse SKI  | PSCGLITKTDAERLCNALLYGGAYPPPCCKELAASLALGLELSERSVRVYHECFGKCKGL<br>*****       **:*****       : : *       .       * *       *: :       : .       *       **:***:**                 |
| Human SKIL | FAPQFYVQPDAPCIQCLECCGMFAPQTFVMHSHRSPDKRCTCHWGFSAKWHCYLHVNQKY                                                                                                                    |
| Human SKI  | LVPELYSSPSAACIQCLDCRLMYPPHKFVVHSHKALENRTCCHWGFDSANWRAYILLSQDY                                                                                                                   |
| Mouse SKI  | LVPELYSSPSAACIQCLDCRLMYPPHKFVVHSHKALENRTCCHWGFDSANWRAYILLSQDY<br>:.:*. : . * . *****: *       *: : . : **.*****: : *****:***:..: : . * . *                                      |
| Human SKIL | LGTPEEKKLKIILEEMKEKF-----                                                                                                                                                       |
| Human SKI  | TGKEEQARLGRCLDDVKEKFDYGNKY                                                                                                                                                      |
| Mouse SKI  | TGKEEQARLGRCLDDVKEKFDYANKY<br>* .       *:       . *       *: : *****                                                                                                           |

R-SMAD binding domain (amino acids 11–45)

Dachshund homology domain (DHD) (amino acids 91–192)

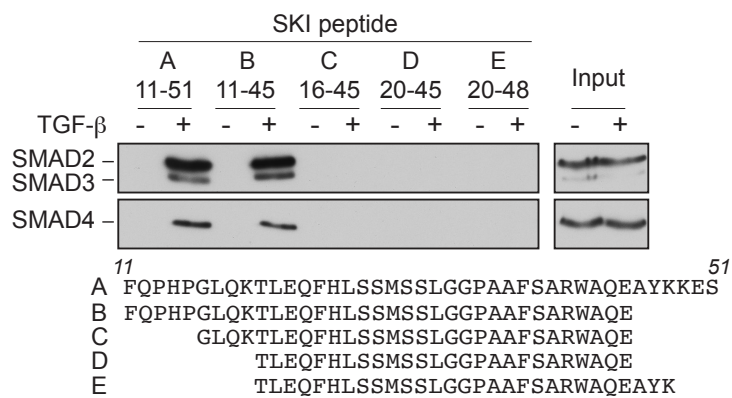

| amino acid substitution |       |       |       |      |      |       |       |       |       |       |       |       |       |       |       |       |      |      |      |      |
|-------------------------|-------|-------|-------|------|------|-------|-------|-------|-------|-------|-------|-------|-------|-------|-------|-------|------|------|------|------|
|                         | A     | R     | N     | D    | C    | Q     | E     | G     | H     | I     | L     | K     | M     | F     | P     | S     | T    | W    | Y    | V    |
| K                       | 34.4  | 75.8  | 39.7  | 41.4 | 23.0 | 60.6  | 47.4  | 20.6  | 34.6  | 17.2  | 20.8  | 34.1  | 7.6   | 7.1   | -6.9  | 24.6  | 20.4 | 7.0  | 7.5  | 7.0  |
| T                       | 27.7  | 7.1   | -5.1  | 8.3  | 6.3  | 1.7   | -3.3  | 0.3   | 2.5   | 50.0  | 12.3  | -4.7  | -1.4  | -0.5  | -11.7 | 7.1   | 63.1 | -2.9 | -0.1 | 30.3 |
| L                       | -16.3 | 2.8   | -3.0  | -4.9 | -5.2 | 3.0   | -8.7  | -8.5  | -5.0  | 31.4  | 48.3  | -7.9  | -5.6  | 5.3   | -10.3 | -5.4  | -5.2 | -8.6 | -8.8 | 4.8  |
| E                       | 63.6  | 127.3 | 89.6  | 75.1 | 58.8 | 133.6 | 100.4 | 62.2  | 48.8  | 36.6  | 66.0  | 144.0 | 99.7  | 74.9  | -4.1  | 67.5  | 54.5 | 75.0 | 60.1 | 39.6 |
| Q                       | 51.9  | 49.2  | 59.6  | 93.6 | 39.2 | 111.8 | 89.1  | 32.1  | 57.5  | 31.1  | 60.6  | 56.3  | 80.5  | 50.7  | -3.3  | 46.3  | 25.1 | 91.0 | 32.1 | 5.7  |
| F                       | 1.4   | -3.7  | 1.2   | -1.0 | -4.7 | -6.1  | -6.9  | -5.3  | 15.2  | 2.9   | 29.2  | 2.8   | 1.8   | 90.2  | -4.8  | -3.9  | -5.0 | -1.2 | 25.8 | -2.7 |
| H                       | 74.0  | 83.9  | 61.6  | 15.1 | 67.9 | 106.2 | 46.9  | 66.1  | 84.4  | 108.5 | 140.6 | 154.2 | 131.9 | 126.1 | -2.8  | 63.1  | 44.9 | 52.5 | 62.0 | 47.1 |
| L                       | 24.0  | 73.2  | 26.0  | 2.1  | 30.2 | 91.6  | 44.3  | 17.1  | 16.5  | 79.4  | 85.2  | 149.1 | 121.0 | 131.9 | -0.4  | 29.1  | 25.7 | 6.6  | 24.9 | 39.1 |
| S                       | 49.4  | 65.4  | 25.8  | 3.7  | 13.6 | 91.6  | 25.5  | 23.5  | 48.4  | 92.9  | 102.5 | 76.3  | 64.2  | 146.6 | 5.5   | 61.0  | 23.1 | 28.9 | 33.5 | 42.4 |
| S                       | 59.2  | 24.2  | -0.4  | 2.2  | 3.8  | -3.2  | -2.2  | 9.4   | 3.5   | 4.3   | 9.1   | 28.2  | 13.2  | 16.8  | 9.9   | 81.1  | 0.3  | -0.7 | 0.4  | -1.8 |
| M                       | 42.3  | 117.3 | 37.2  | 12.9 | 44.8 | 132.9 | 41.1  | 86.7  | 63.8  | 100.2 | 104.1 | 175.1 | 150.8 | 98.4  | 66.4  | 58.1  | 52.2 | 20.6 | 5.8  | 42.8 |
| S                       | 59.1  | 142.4 | 117.2 | 80.9 | 87.5 | 119.1 | 76.6  | 96.2  | 122.7 | 107.7 | 119.9 | 168.9 | 151.0 | 172.7 | 10.8  | 108.1 | 67.2 | 82.1 | 97.4 | 54.8 |
| S                       | 22.8  | 71.6  | 73.2  | 12.7 | 10.8 | 43.1  | 7.0   | 80.6  | 18.9  | 23.1  | 38.2  | 52.7  | 54.6  | 60.1  | 8.8   | 104.2 | 35.6 | 1.6  | 7.0  | 3.5  |
| L                       | 7.3   | 26.9  | 17.0  | 6.0  | 9.8  | 6.2   | -0.2  | 6.4   | 12.1  | 65.0  | 150.4 | 49.3  | 23.9  | 22.5  | 17.0  | 15.7  | 26.5 | 28.8 | 33.4 | 14.4 |
| G                       | 79.4  | 144.8 | 79.5  | 74.3 | 52.6 | 144.6 | 66.8  | 139.9 | 103.9 | 113.2 | 108.7 | 166.7 | 133.7 | 116.2 | 14.6  | 104.1 | 49.9 | 77.8 | 41.0 | 47.1 |
| G                       | 9.9   | 9.2   | 4.3   | 35.5 | 18.3 | 15.1  | 13.5  | 138.2 | 15.5  | 42.0  | 13.1  | 23.2  | 20.4  | 25.5  | 16.6  | 14.3  | 9.5  | 13.6 | 4.1  | 3.9  |
| P                       | 31.8  | 72.5  | 6.5   | 10.7 | 26.3 | 32.1  | 8.8   | 20.6  | 26.9  | 33.1  | 64.9  | 127.2 | 20.3  | 13.7  | 125.9 | 15.6  | 13.9 | 13.6 | 14.1 | 26.4 |
