# Supplementary material for: Mutations in SKI in Shprintzen–Goldberg syndrome lead to attenuated TGF-β responses through SKI stabilization
Source: eLife journal article supplement (doi:10.7554/elife.63545), 2021-01-08
Supplement: supp [file elife-63545-supp-v1.zip › elife_poa_e63545_Figure_4_source_data_2.xlsx]

## Sheet: Notes
Peptide WT SKI	Positive control: FQPHPGLQKTLEQFHLSSMSSLGGPAAFSARWAQE				Array 1					Array 2						Position for quantification																						Position for quantification
Peptide SKI-C	Negative control: GLQKTLEQFHLSSMSSLGGPAAFSARWAQE
					amino acid substitution					amino acid substitution							A	R	N	D	C	Q	E	G	H	I	L	K	M	F	P	S	T	W	Y	V			WT	WT	WT	WT	WT
Sheet raw intensities	measurement of mean grey scale intensity of peptide arrays		Position		A R N D C Q E G H I L K M F P S T W Y V					A R N D C Q E G H I L K M F P S T W Y V						K	1	2	3	4	5	6	7	8	9	10	11	12	13	14	15	16	17	18	19	20		WT	1	2	3	4	5
Array 1	Normalised intensities array 1		1	K												T	21	22	23	24	25	26	27	28	29	30	31	32	33	34	35	36	37	38	39	40		WT	6	7	8	9	10
Array 1	Normalised intensities array 2		21	T												L	41	42	43	44	45	46	47	48	49	50	51	52	53	54	55	56	57	58	59	60		WT	11	12	13	14	15
Means	average of normalised intensities and standard deviation array 1 and 2		41	L												E	61	62	63	64	65	66	67	68	69	70	71	72	73	74	75	76	77	78	79	80		WT	16	17	18	19	20
			61	E												Q	81	82	83	84	85	86	87	88	89	90	91	92	93	94	95	96	97	98	99	100
			81	Q												F	101	102	103	104	105	106	107	108	109	110	111	112	113	114	115	116	117	118	119	120
			101	F												H	121	122	123	124	125	126	127	128	129	130	131	132	133	134	135	136	137	138	139	140		Position for quantification
			121	H												L	141	142	143	144	145	146	147	148	149	150	151	152	153	154	155	156	157	158	159	160
			141	L												S	161	162	163	164	165	166	167	168	169	170	171	172	173	174	175	176	177	178	179	180			SKI Peptide C	SKI Peptide C	SKI Peptide C	SKI Peptide C	SKI Peptide C
			161	S												S	181	182	183	184	185	186	187	188	189	190	191	192	193	194	195	196	197	198	199	200		SKI-C	1	2	3	4	5
			181	S												M	201	202	203	204	205	206	207	208	209	210	211	212	213	214	215	216	217	218	219	220		SKI-C	6	7	8	9	10
			201	M												S	221	222	223	224	225	226	227	228	229	230	231	232	233	234	235	236	237	238	239	240		SKI-C	11	12	13	14	15
			221	S												S	241	242	243	244	245	246	247	248	249	250	251	252	253	254	255	256	257	258	259	260		SKI-C	16	17	18	19	20
			241	S												L	261	262	263	264	265	266	267	268	269	270	271	272	273	274	275	276	277	278	279	280
			261	L												G	281	282	283	284	285	286	287	288	289	290	291	292	293	294	295	296	297	298	299	300
			281	G												G	301	302	303	304	305	306	307	308	309	310	311	312	313	314	315	316	317	318	319	320
			301	G												P	321	322	323	324	325	326	327	328	329	330	331	332	333	334	335	336	337	338	339	340
			321	P
				WT SKI
				WT SKI
				WT SKI
				WT SKI
				SKI-C
				SKI-C
				SKI-C
				SKI-C

## Sheet: Raw intensities
array 1	average intensity		positive 1.1	average intensity		positive 1.2	average intensity		positive 1.3	average intensity		negative 1.1	average intensity		negative 1.2	average intensity		negative 1.3	average intensity			Array 2	average intensity		positive 2.1	average intensity		positive 2.2	average intensity		positive 2.3	average intensity		negative 2.1	average intensity		negative 2.2	average intensity		negative 2.3	average intensity
1	160.956		1	113.215		1	40.997		1	87.703		1	198.547		1	191.424		1	185.994			1	127.373		1	74.408		1	31.361		21	48.968		1	182.699		1	176.095		21	157.399
2	98.513		2	88.342		2	71.244		2	111		2	201.006		2	186.573		2	186.722			2	103.725		2	102.861		2	65.339		22	60.285		2	175.329		2	161.354		22	155.636
3	136.744		3	82.772		3	80.911		3	98.222		3	193.351		3	187.747		3	187.823			3	138.193		3	73.32		3	57.098		23	79.459		3	174.766		3	170.566		23	165.275
4	130.668		4	93.13		4	79.351		4	70.475		4	145.677		4	188.199		4	186.361			4	140.127		4	47.016		4	37.807		24	107.68		4	181.339		4	170.361		24	162.047
5	144.335		5	103.554		5	51.263		5	71.94		5	185.348		5	190.633		5	190.339			5	162.554		5	26.408		5	40.547		25	117.266		5	166.592		5	170.864		25	175.532
6	91.741		6	124.187		6	31.807		6	83.896		6	187.054		6	190.886		6	186.095			6	137.554		6	82.225		6	29.487		26	57.816		6	173.484		6	172.158		26	153.848
7	116.968		7	106.009		7	56.392		7	99.25		7	186.244		7	188.215		7	192.753			7	140.563		7	104.674		7	34.959		27	75.899		7	168.984		7	152.801		27	159.775
8	162.684		8	79.924		8	68.706		8	82.608		8	196.525		8	190.304		8	192.278			8	151.579		8	78.443		8	62.684		28	80.601		8	170.028		8	157.253		28	168.582
9	153.079		9	84.68		9	68.177		9	67.171		9	196.351		9	191.332		9	189.063			9	133.693		9	54.269		9	59.576		29	90.715		9	177.209		9	152.225		29	164.63
10	169.671		10	98.12		10	42.285		10	73.525		10	194.028		10	191.057		10	190.513			10	151.81		10	40.424		10	41.329		30	143.82		10	176.364		10	163.652		30	169.247
11	165.984		11	131.18		11	42.709		11	78.57		11	195.674		11	191.155		11	188.193			11	148.25		11	76.478		11	62.57		31	92.782		11	183.158		11	180.13		31	173.684
12	157.225		12	116.75		12	69.715		12	101.965		12	192.639		12	190.092		12	192.234			12	131.104		12	97.788		12	78.896		32	97.551		12	163.832		12	163.801		32	159.506
13	182.133		13	94.339		13	57.734		13	78.595		13	150.478		13	189.263		13	195.915			13	159.139		13	92.934		13	68.405		33	91.386		13	172.991		13	157.256		33	160.57
14	174.187		14	99.722		14	68.756		14	64.089		14	192.915		14	191.244		14	192.101			14	166.75		14	66.731		14	72.674		34	105.415		14	176.272		14	155.196		34	160.43
15	182.981		15	110.608		15	65.193		15	81.661		15	184.87		15	189.902		15	193.509			15	185.234		15	51.579		15	98.522		35	129.674		15	175.987		15	161.5		35	163.956
16	129.237		16	131.528		16	42.601		16	73.13		16	189.117		16	185.427		16	185.845			16	172.5		16	69.465		16	65.563		36	62.446		16	178		16	173.18		36	166.722
17	140.481		17	114.092		17	56.278		17	81.326		17	191.737		17	182.731		17	188.532			17	170.741		17	80.775		17	80.801		37	79.677		17	171.351		17	162.519		37	163.19
18	169.839		18	85.513		18	47.991		18	56.278		18	195.93		18	165.506		18	184.595			18	170.604		18	95.016		18	95.177		38	93.968		18	176.405		18	159.905		38	158.636
19	182.373		19	94.513		19	41.867		19	43.994		19	191.585		19	184.889		19	189.421			19	159.019		19	77.509		19	78.44		39	98.206		19	186.228		19	155.38		39	180.25
20	189.443		20	108.737		20	36.611		20	49.709		20	184.152		20	185.557		20	185.636			20	153.949		20	53.294		20	88.092		40	115.896		20	182.902		20	152.899		40	182.722
21	169.854																					21	132.266
22	178.57																					22	170.522
23	187.842																					23	177.737
24	168.073																					24	169.709
25	174.079																					25	168.301
26	176.332																					26	174.911
27	189.56																					27	172.937
28	185.285																					28	170.013
29	190.509																					29	161.481
30	130.12																					30	124.623
31	175.329																					31	156.193
32	192.674																					32	172.949
33	190.747																					33	168.478
34	180.877																					34	175.256
35	194.345																					35	184.487
36	159.329																					36	179.301
37	83.706																					37	139.829
38	189.294																					38	172.44
39	191.101																					39	165.794
40	174.778																					40	123.196
41	198.57																					41	189.364
42	181.924																					42	168.13
43	181.544																					43	179.323
44	185.573																					44	179.278
45	181.282																					45	183.503
46	190.168																					46	160.801
47	188.734																					47	183.715
48	190.554																					48	181.851
49	197.759																					49	169.168
50	163.937																					50	130.481
51	145.652																					51	114.715
52	192.598																					52	179.016
53	188.133																					53	178.528
54	178.769																					54	166.234
55	186.965																					55	188.085
56	186.959																					56	179.025
57	192.177																					57	174.278
58	194.839																					58	178.424
59	191.715																					59	181.373
60	187.772																					60	159.595
61	148.418																					61	83.829
62	13.231																					62	80.627
63	56.807																					63	113.446
64	94.788																					64	108.051
65	109.804																					65	125.661
66	19.959																					66	63.234
67	75.585																					67	77.437
68	111.139																					68	118.149
69	151.408																					69	108.769
70	149.263																					70	133.285
71	126.5																					71	97.991
72	7.94																					72	54.12
73	39.089																					73	109.718
74	64.541																					74	134.222
75	183.756																					75	179.462
76	64.883																					76	147.491
77	98.649																					77	143.047
78	105.494																					78	99.136
79	139.399																					79	98.066
80	155.073																					80	122.671
81	151.532																					81	103.041
82	124.592																					82	130.801
83	101.155																					83	131.383
84	80.715																					84	85.775
85	146.348																					85	130.886
86	67.984																					86	62.785
87	94.598																					87	82.326
88	149.823																					88	141.095
89	125.813																					89	114.342
90	160.373																					90	134.009
91	139.782																					91	96.886
92	138.016																					92	106.209
93	88.576																					93	103.383
94	118.399																					94	133.313
95	190.614																					95	172.098
96	113.139																					96	145.908
97	150.684																					97	153.392
98	72.304																					98	97.794
99	163.953																					99	129.047
100	182.763																					100	162.079
101	182.044																					101	170.68
102	185.563																					102	177.082
103	181.674																					103	171.266
104	176.636																					104	179.693
105	183.547																					105	180.759
106	185.304																					106	181.715
107	186.212																					107	182.544
108	185.263																					108	180.31
109	182.199																					109	144.94
110	192.184																					110	159.266
111	170.487																					111	128.956
112	189.959																					112	161.415
113	185.013																					113	167.497
114	75.383																					114	96.573
115	188.627																					115	176.557
116	186.791																					116	176.484
117	182.75																					117	181.959
118	185.652																					118	172.399
119	157.759																					119	146.098
120	186.668																					120	174.367
121	131.791																					121	78.829
122	101.456																					122	86.212
123	108.696																					123	121.38
124	168.041																					124	157.104
125	119.092																					125	100.788
126	80.104																					126	62.858
127	138.418																					127	123.38
128	105.282																					128	115.864
129	101.769																					129	84.873
130	90.911																					130	49.424
131	75.415																					131	3.171
132	47.547																					132	1.601
133	82.525																					133	13.335
134	82.446																					134	33.316
135	184.155																					135	176.731
136	107.965																					136	119.12
137	123.31																					137	139.962
138	118.953																					138	129.506
139	112.541																					139	117.361
140	144.038																					140	118.301
141	156.266																					141	150.63
142	98.085																					142	108.81
143	152.706																					143	150.051
144	178.481																					144	172.434
145	154.082																					145	141.079
146	81.835																					146	88.509
147	130.816																					147	134.538
148	164.348																					148	156.506
149	162.168																					149	159.623
150	98.608																					150	96.965
151	119.443																					151	68.472
152	37.101																					152	19.968
153	112.497																					153	7.943
154	80.244																					154	5.826
155	187.693																					155	169.253
156	142.759																					156	152.699
157	146.816																					157	155.525
158	175.146																					158	166.839
159	151.589																					159	153.041
160	151.013																					160	127.12
161	145.823																					161	112.364
162	98.025																					162	123.339
163	157.636																					163	146.13
164	179.136																					164	168.934
165	169.316																					165	158.921
166	81.741																					166	88.535
167	159.835																					167	144.845
168	159.576																					168	148.699
169	142.123																					169	117.446
170	100.291																					170	70.544
171	90.63																					171	60.778
172	132.598																					172	73.737
173	138.601																					173	91.206
174	56.152																					174	8.323
175	186.608																					175	159.165
176	113.051																					176	118.709
177	152.598																					177	155.392
178	145.896																					178	150.411
179	136.196																					179	150.114
180	156.703																					180	116.234
181	130.089																					181	107.68
182	163.579																					182	144.057
183	183.725																					183	172.551
184	178.566																					184	172.177
185	182.386																					185	165.927
186	183.69																					186	177.766
187	186.709																					187	173.427
188	171.066																					188	165.206
189	181.259																					189	167.487
190	190.509																					190	158.155
191	189.127																					191	150.427
192	169.092																					192	131.921
193	179.231																					193	151.253
194	180.171																					194	143.703
195	178.965																					195	157.509
196	106.88																					196	86.794
197	181.753																					197	172.953
198	185.177																					198	171.832
199	182.373																					199	172.203
200	186.228																					200	173.092
201	139.291																					201	131.13
202	36.554																					202	79.269
203	153.475																					203	128.601
204	174.892																					204	155.491
205	135.266																					205	129.981
206	27.94																					206	57.636
207	132.924																					207	138.687
208	79.462																					208	99.684
209	132																					209	97.516
210	103.035																					210	54.595
211	94.753																					211	54.399
212	0.237																					212	3.047
213	44.627																					213	10.323
214	94.712																					214	64.978
215	134.82																					215	90.234
216	134.851																					216	105.608
217	119.415																					217	129.601
218	158.731																					218	154.946
219	166.703																					219	175.506
220	146.788																					220	123.918
221	120.367																					221	116.003
222	29.959																					222	38.354
223	108.915																					223	18.047
224	110.832																					224	83.785
225	89.791																					225	89.456
226	44.149																					226	69.563
227	86.699																					227	112.288
228	70.867																					228	89.291
229	73.307																					229	38.114
230	102.259																					230	41.339
231	90.592																					231	28.617
232	11.348																					232	5.063
233	38.203																					233	15.44
234	8.595																					234	0.282
235	174.608																					235	159.636
236	100.475																					236	42.184
237	127.646																					237	94.902
238	77.323																					238	109.889
239	53.076																					239	102.244
240	120.446																					240	124.019
241	159.212																					241	150.468
242	98.108																					242	111.87
243	142.12																					243	71.538
244	176.389																					244	154.566
245	171.589																					245	162.054
246	132.861																					246	135.044
247	168.509																					247	171.747
248	81.076																					248	109.633
249	167.899																					249	150.253
250	174.718																					250	136.677
251	169.434																					251	113.234
252	135.446																					252	115.218
253	131.782																					253	114.804
254	134.547																					254	102.263
255	176.377																					255	161.737
256	114.687																					256	37.297
257	155.899																					257	129.491
258	177.775																					258	173.93
259	165.595																					259	174.177
260	183.465																					260	165.598
261	173.07																					261	167.294
262	166.418																					262	136.661
263	181.896																					263	141.829
264	173.256																					264	169.661
265	176.611																					265	159.763
266	176.139																					266	166.69
267	182.981																					267	172.816
268	177.13																					268	165.519
269	185.345																					269	147.991
270	144.5																					270	84.611
271	53.772																					271	3.266
272	166.975																					272	94.585
273	175.712																					273	134.323
274	180.415																					274	132.949
275	183.013																					275	140.978
276	181.503																					276	144.655
277	182.554																					277	123.693
278	176.516																					278	124.63
279	179.161																					279	113.851
280	188.016																					280	141.478
281	83.557																					281	109.744
282	19.759																					282	42.585
283	115.231																					283	82.674
284	133.297																					284	76.921
285	107.155																					285	139.405
286	14.658																					286	47.269
287	101.354																					287	117.934
288	17.934																					288	53.263
289	115.19																					289	37.351
290	138.949																					290	0.108
291	118.766																					291	25.513
292	1.709																					292	17.234
293	64.032																					293	25.589
294	76.978																					294	46.965
295	186.459																					295	142.519
296	127.554																					296	26.646
297	156.076																					297	102.889
298	92.446																					298	105.051
299	129.718																					299	141.595
300	143.981																					300	118.288
301	153.797																					301	178.959
302	161.703																					302	173.468
303	177.329																					303	169.237
304	175.25																					304	113.25
305	178.478																					305	142.367
306	178.5																					306	148.297
307	180.101																					307	149.902
308	27.839																					308	47.981
309	187.462																					309	140.009
310	184.275																					310	93.554
311	181.212																					311	149.617
312	177.557																					312	134.041
313	180.535																					313	136.813
314	177.12																					314	130.12
315	181.509																					315	142.994
316	184.453																					316	144.728
317	187.158																					317	151.269
318	178.75																					318	150.759
319	183.082																					319	164.747
320	185.668																					320	163.013
321	141.415																					321	148.864
322	86.538																					322	119.883
323	179.69																					323	163.231
324	178.041																					324	156.775
325	162.032																					325	141.513
326	173.69																					326	120.801
327	177.668																					327	160.734
328	165.484																					328	149.161
329	181.972																					329	123.392
330	161.94																					330	128.972
331	131.87																					331	95.57
332	64.367																					332	36.782
333	177.313																					333	139.611
334	177.187																					334	152.003
335	83.57																					335	23.563
336	182.389																					336	144.149
337	184.288																					337	145.687
338	173.87																					338	155.025
339	174.358																					339	153.598
340	160.117																					340	142.883

## Sheet: Array 1
mean grey scale intensity (X)																								positive 1.1	positive 1.2	positive 1.3			negative 1.1	negative 1.2	negative 1.3
	A	R	N	D	C	Q	E	G	H	I	L	K	M	F	P	S	T	W	Y	V				113.215	40.997	87.703			198.547	191.424	185.994
K	160.956	98.513	136.744	130.668	144.335	91.741	116.968	162.684	153.079	169.671	165.984	157.225	182.133	174.187	182.981	129.237	140.481	169.839	182.373	189.443				88.342	71.244	111			201.006	186.573	186.722
T	169.854	178.57	187.842	168.073	174.079	176.332	189.56	185.285	190.509	130.12	175.329	192.674	190.747	180.877	194.345	159.329	83.706	189.294	191.101	174.778				82.772	80.911	98.222			193.351	187.747	187.823
L	198.57	181.924	181.544	185.573	181.282	190.168	188.734	190.554	197.759	163.937	145.652	192.598	188.133	178.769	186.965	186.959	192.177	194.839	191.715	187.772				93.13	79.351	70.475			145.677	188.199	186.361
E	148.418	13.231	56.807	94.788	109.804	19.959	75.585	111.139	151.408	149.263	126.5	7.94	39.089	64.541	183.756	64.883	98.649	105.494	139.399	155.073				103.554	51.263	71.94			185.348	190.633	190.339
Q	151.532	124.592	101.155	80.715	146.348	67.984	94.598	149.823	125.813	160.373	139.782	138.016	88.576	118.399	190.614	113.139	150.684	72.304	163.953	182.763				124.187	31.807	83.896			187.054	190.886	186.095
F	182.044	185.563	181.674	176.636	183.547	185.304	186.212	185.263	182.199	192.184	170.487	189.959	185.013	75.383	188.627	186.791	182.75	185.652	157.759	186.668				106.009	56.392	99.25			186.244	188.215	192.753
H	131.791	101.456	108.696	168.041	119.092	80.104	138.418	105.282	101.769	90.911	75.415	47.547	82.525	82.446	184.155	107.965	123.31	118.953	112.541	144.038				79.924	68.706	82.608			196.525	190.304	192.278
L	156.266	98.085	152.706	178.481	154.082	81.835	130.816	164.348	162.168	98.608	119.443	37.101	112.497	80.244	187.693	142.759	146.816	175.146	151.589	151.013				84.68	68.177	67.171			196.351	191.332	189.063
S	145.823	98.025	157.636	179.136	169.316	81.741	159.835	159.576	142.123	100.291	90.63	132.598	138.601	56.152	186.608	113.051	152.598	145.896	136.196	156.703				98.12	42.285	73.525			194.028	191.057	190.513
S	130.089	163.579	183.725	178.566	182.386	183.69	186.709	171.066	181.259	190.509	189.127	169.092	179.231	180.171	178.965	106.88	181.753	185.177	182.373	186.228				131.18	42.709	78.57			195.674	191.155	188.193
M	139.291	36.554	153.475	174.892	135.266	27.94	132.924	79.462	132	103.035	94.753	0.237	44.627	94.712	134.82	134.851	119.415	158.731	166.703	146.788				116.75	69.715	101.965			192.639	190.092	192.234
S	120.367	29.959	108.915	110.832	89.791	44.149	86.699	70.867	73.307	102.259	90.592	11.348	38.203	8.595	174.608	100.475	127.646	77.323	53.076	120.446				94.339	57.734	78.595			150.478	189.263	195.915
S	159.212	98.108	142.12	176.389	171.589	132.861	168.509	81.076	167.899	174.718	169.434	135.446	131.782	134.547	176.377	114.687	155.899	177.775	165.595	183.465				99.722	68.756	64.089			192.915	191.244	192.101
L	173.07	166.418	181.896	173.256	176.611	176.139	182.981	177.13	185.345	144.5	53.772	166.975	175.712	180.415	183.013	181.503	182.554	176.516	179.161	188.016				110.608	65.193	81.661			184.87	189.902	193.509
G	83.557	19.759	115.231	133.297	107.155	14.658	101.354	17.934	115.19	138.949	118.766	1.709	64.032	76.978	186.459	127.554	156.076	92.446	129.718	143.981				131.528	42.601	73.13			189.117	185.427	185.845
G	153.797	161.703	177.329	175.25	178.478	178.5	180.101	27.839	187.462	184.275	181.212	177.557	180.535	177.12	181.509	184.453	187.158	178.75	183.082	185.668				114.092	56.278	81.326			191.737	182.731	188.532
P	141.415	86.538	179.69	178.041	162.032	173.69	177.668	165.484	181.972	161.94	131.87	64.367	177.313	177.187	83.57	182.389	184.288	173.87	174.358	160.117				85.513	47.991	56.278			195.93	165.506	184.595
																								94.513	41.867	43.994			191.585	184.889	189.421
																								108.737	36.611	49.709			184.152	185.557	185.636
X= Mean grey scale intensity for sample
N= average of mean grey scale intensity for negative																							average positive (P)	78.9435				average negative (N)	188.155
P= average of mean grey scale intensity for positive
normalised intensities(100X(N-X)/(N-P)
	A	R	N	D	C	Q	E	G	H	I	L	K	M	F	P	S	T	W	Y	V
K	24.9047	82.0811	47.0746	52.6381	40.1239	88.2819	65.1826	23.3225	32.1174	16.9248	20.3008	28.321	5.51387	12.7897	4.73739	53.9484	43.6528	16.7709	5.29411	-1.17958
T	16.7572	8.77635	0.286387	18.388	12.8886	10.8256	-1.28671	2.62772	-2.15567	53.1399	11.744	-4.13807	-2.3736	6.66393	-5.66813	26.3945	95.6392	-1.04315	-2.69774	12.2485
L	-9.53678	5.70524	6.05319	2.36401	6.29309	-1.84343	-0.530379	-2.19687	-8.79418	22.1752	38.9179	-4.06848	0.0199308	8.59414	1.08942	1.09491	-3.68298	-6.12046	-3.25995	0.350483
E	36.3852	160.17	120.269	85.4919	71.7424	154.01	103.075	70.52	33.6474	35.6115	56.4546	165.015	136.493	113.188	4.02776	112.875	81.9565	75.6889	44.6435	30.2915
Q	33.5339	58.2017	79.6619	98.3779	38.2806	110.035	85.6659	35.0987	57.0836	25.4386	44.2928	45.9099	91.1799	63.8723	-2.25181	68.6887	34.3103	106.08	22.1605	4.93701
F	5.59536	2.37317	5.93416	10.5472	4.21913	2.61032	1.77891	2.64786	5.45344	-3.68939	16.1776	-1.65206	2.87678	103.26	-0.432403	1.24874	4.94891	2.29167	27.8321	1.36137
H	51.6098	79.3863	72.7569	18.4173	63.2378	98.9374	45.5418	75.883	79.0997	89.0419	103.231	128.748	96.7206	96.7929	3.66241	73.4263	59.3755	63.365	69.2362	40.3958
L	29.1992	82.473	32.4589	8.85785	31.1989	97.3524	52.5026	21.7988	23.795	81.9941	62.9164	138.313	69.2765	98.8092	0.42282	41.5669	37.8521	11.9116	33.4817	34.0091
S	38.7614	82.5279	27.9447	8.25809	17.2498	97.4385	25.9312	26.1683	42.1493	80.453	89.2992	50.8709	45.3742	120.869	1.41631	68.7692	32.5578	38.6945	47.5764	28.799
S	53.1683	22.503	4.05614	8.78002	5.28221	4.08819	1.32383	15.6474	6.31415	-2.15567	-0.890232	17.4549	8.1711	7.31039	8.41467	74.4198	5.86182	2.72661	5.29411	1.76426
M	44.7424	138.814	31.7548	12.1441	48.4279	146.702	50.5724	99.5252	51.4185	77.9405	85.5239	172.068	131.422	85.5615	48.8363	48.8079	62.942	26.9421	19.6424	37.8777
S	62.0703	144.853	72.5564	70.8011	90.0674	131.86	92.8986	107.395	105.161	78.651	89.334	161.894	137.304	164.415	12.4042	80.2845	55.4052	101.484	123.686	61.998
S	26.5016	82.4519	42.152	10.7734	15.1686	50.6301	17.9888	98.0474	18.5473	12.3035	17.1418	48.2631	51.6181	49.0863	10.7844	67.2712	29.5352	9.5043	20.657	4.29422
L	13.8125	19.9034	5.73088	13.6422	10.5701	11.0023	4.73739	10.0949	2.57278	39.9728	123.048	19.3934	11.3933	7.08697	4.70809	6.09073	5.12838	10.6571	8.2352	0.127063
G	95.7756	154.193	66.7731	50.2309	74.168	158.863	79.4797	155.864	66.8107	45.0556	63.5363	170.72	113.654	101.8	1.55274	55.4895	29.3731	87.6363	53.508	40.448
G	31.4599	24.2207	9.91268	11.8163	8.86059	8.84045	7.37448	146.794	0.634336	3.55253	6.35719	9.70391	6.97709	10.1041	6.08524	3.38955	0.912696	8.61154	4.64491	2.27702
P	42.7976	93.046	7.75082	9.26074	23.9195	13.2448	9.60228	20.7586	5.66129	24.0037	51.5375	113.347	9.92733	10.0427	95.7637	5.27946	3.54063	13.0799	12.6331	25.673

## Sheet: Array2
mean grey scale intensity																									positive 1.1	positive 1.2	positive 1.3			negative 1.1	negative 1.2	negative 1.3
	A	R	N	D	C	Q	E	G	H	I	L	K	M	F	P	S	T	W	Y	V					74.408	31.361	48.968			182.699	176.095	157.399
K	127.373	103.725	138.193	140.127	162.554	137.554	140.563	151.579	133.693	151.81	148.25	131.104	159.139	166.75	185.234	172.5	170.741	170.604	159.019	153.949					102.861	65.339	60.285			175.329	161.354	155.636
T	132.266	170.522	177.737	169.709	168.301	174.911	172.937	170.013	161.481	124.623	156.193	172.949	168.478	175.256	184.487	179.301	139.829	172.44	165.794	123.196					73.32	57.098	79.459			174.766	170.566	165.275
L	189.364	168.13	179.323	179.278	183.503	160.801	183.715	181.851	169.168	130.481	114.715	179.016	178.528	166.234	188.085	179.025	174.278	178.424	181.373	159.595					47.016	37.807	107.68			181.339	170.361	162.047
E	83.829	80.627	113.446	108.051	125.661	63.234	77.437	118.149	108.769	133.285	97.991	54.12	109.718	134.222	179.462	147.491	143.047	99.136	98.066	122.671					26.408	40.547	117.266			166.592	170.864	175.532
Q	103.041	130.801	131.383	85.775	130.886	62.785	82.326	141.095	114.342	134.009	96.886	106.209	103.383	133.313	172.098	145.908	153.392	97.794	129.047	162.079					82.225	29.487	57.816			173.484	172.158	153.848
F	170.68	177.082	171.266	179.693	180.759	181.715	182.544	180.31	144.94	159.266	128.956	161.415	167.497	96.573	176.557	176.484	181.959	172.399	146.098	174.367					104.674	34.959	75.899			168.984	152.801	159.775
H	78.829	86.212	121.38	157.104	100.788	62.858	123.38	115.864	84.873	49.424	3.171	1.601	13.335	33.316	176.731	119.12	139.962	129.506	117.361	118.301					78.443	62.684	80.601			170.028	157.253	168.582
L	150.63	108.81	150.051	172.434	141.079	88.509	134.538	156.506	159.623	96.965	68.472	19.968	7.943	5.826	169.253	152.699	155.525	166.839	153.041	127.12					54.269	59.576	90.715			177.209	152.225	164.63
S	112.364	123.339	146.13	168.934	158.921	88.535	144.845	148.699	117.446	70.544	60.778	73.737	91.206	8.323	159.165	118.709	155.392	150.411	150.114	116.234					40.424	41.329	143.82			176.364	163.652	169.247
S	107.68	144.057	172.551	172.177	165.927	177.766	173.427	165.206	167.487	158.155	150.427	131.921	151.253	143.703	157.509	86.794	172.953	171.832	172.203	173.092					76.478	62.57	92.782			183.158	180.13	173.684
M	131.13	79.269	128.601	155.491	129.981	57.636	138.687	99.684	97.516	54.595	54.399	3.047	10.323	64.978	90.234	105.608	129.601	154.946	175.506	123.918					97.788	78.896	97.551			163.832	163.801	159.506
S	116.003	38.354	18.047	83.785	89.456	69.563	112.288	89.291	38.114	41.339	28.617	5.063	15.44	0.282	159.636	42.184	94.902	109.889	102.244	124.019					92.934	68.405	91.386			172.991	157.256	160.57
S	150.468	111.87	71.538	154.566	162.054	135.044	171.747	109.633	150.253	136.677	113.234	115.218	114.804	102.263	161.737	37.297	129.491	173.93	174.177	165.598					66.731	72.674	105.415			176.272	155.196	160.43
L	167.294	136.661	141.829	169.661	159.763	166.69	172.816	165.519	147.991	84.611	3.266	94.585	134.323	132.949	140.978	144.655	123.693	124.63	113.851	141.478					51.579	98.522	129.674			175.987	161.5	163.956
G	109.744	42.585	82.674	76.921	139.405	47.269	117.934	53.263	37.351	0.108	25.513	17.234	25.589	46.965	142.519	26.646	102.889	105.051	141.595	118.288					69.465	65.563	62.446			178	173.18	166.722
G	178.959	173.468	169.237	113.25	142.367	148.297	149.902	47.981	140.009	93.554	149.617	134.041	136.813	130.12	142.994	144.728	151.269	150.759	164.747	163.013					80.775	80.801	79.677			171.351	162.519	163.19
P	148.864	119.883	163.231	156.775	141.513	120.801	160.734	149.161	123.392	128.972	95.57	36.782	139.611	152.003	23.563	144.149	145.687	155.025	153.598	142.883					95.016	95.177	93.968			176.405	159.905	158.636
																									77.509	78.44	98.206			186.228	155.38	180.25
																									53.294	88.092	115.896			182.902	152.899	182.722
X= Mean grey scale intensity for sample
N= average of mean grey scale intensity for negative																								average positive (P)	75.4076				average negative (N)	168.078
P= average of mean grey scale intensity for positive
normalised intensities(100X(N-X)/(N-P)
	A	R	N	D	C	Q	E	G	H	I	L	K	M	F	P	S	T	W	Y	V
K	43.9242	69.4427	32.2483	30.1614	5.96044	32.9379	29.6909	17.8035	37.1043	17.5543	21.3959	39.8981	9.64556	1.43254	-18.5135	-4.77228	-2.87414	-2.72631	9.77505	15.2461
T	38.6442	-2.63782	-10.4235	-1.76051	-0.241142	-7.37398	-5.24384	-2.08856	7.11831	46.8917	12.8246	-5.25679	-0.432143	-7.74627	-17.7074	-12.1112	30.4829	-4.70753	2.46416	48.4316
L	-22.9702	-0.0566167	-12.135	-12.0864	-16.6456	7.85209	-16.8744	-14.8629	-1.17672	40.5704	57.5834	-11.8037	-11.2771	1.98935	-21.59	-11.8134	-6.69091	-11.1649	-14.3471	9.15349
E	90.9124	94.3677	58.9528	64.7745	45.7716	113.136	97.81	53.8778	63.9997	37.5446	75.6303	122.971	62.9757	36.5334	-12.285	22.2149	27.0104	74.3947	75.5493	48.9981
Q	70.1808	40.225	39.597	88.8125	40.1333	113.621	92.5343	29.1168	57.9859	36.7633	76.8227	66.7622	69.8118	37.5143	-4.33848	23.9231	15.8471	75.8428	42.1178	6.47301
F	-2.80832	-9.7167	-3.44067	-12.5342	-13.6845	-14.7162	-15.6107	-13.2	24.9677	9.50851	42.216	7.18953	0.626453	77.1604	-9.15018	-9.0714	-14.9795	-4.66329	23.7181	-6.78695
H	96.3079	88.341	50.3912	11.8415	72.612	113.542	48.233	56.3435	89.7859	128.039	177.95	179.645	166.982	145.421	-9.33794	52.83	30.3394	41.6225	54.7281	53.7138
L	18.8276	63.9555	19.4524	-4.70106	29.1341	85.8623	36.1925	12.4868	9.12327	76.7374	107.484	159.825	172.801	175.085	-1.26844	16.5949	13.5454	1.3365	16.2259	44.1972
S	60.1204	48.2773	23.6835	-0.924212	9.8808	85.8342	25.0702	20.9113	54.6364	105.248	115.787	101.803	82.9519	172.391	9.6175	53.2735	13.6889	19.0639	19.3844	55.9443
S	65.1749	25.9205	-4.82731	-4.42373	2.32064	-10.4548	-5.7726	3.09867	0.637243	10.7074	19.0467	39.0165	18.1553	26.3025	11.4045	87.7129	-5.26111	-4.05144	-4.45178	-5.4111
M	39.87	95.8331	42.5991	13.5821	41.1099	119.177	31.7153	73.8033	76.1428	122.459	122.67	178.084	170.233	111.255	84.0008	67.4108	41.52	14.1702	-8.01605	47.6525
S	56.1935	139.984	161.898	90.9599	84.8404	106.307	60.2024	85.0184	140.243	136.763	150.492	175.909	164.711	181.068	9.10924	135.851	78.9636	62.7911	71.0409	47.5435
S	19.0024	60.6535	104.176	14.5803	6.49998	35.6464	-3.95972	63.0674	19.2344	33.8843	59.1816	57.0406	57.4874	71.0203	6.84206	141.125	41.6387	-6.31539	-6.58192	2.67566
L	0.845509	33.9015	28.3247	-1.70872	8.9722	1.49728	-5.11327	2.76091	21.6753	90.0686	177.848	79.3057	36.4245	37.9071	29.2431	25.2752	47.8953	46.8842	58.5158	28.7035
G	62.9476	135.419	92.1588	98.3669	30.9405	130.364	54.1098	123.896	141.067	181.256	153.841	162.775	153.759	130.692	27.5802	152.619	70.3448	68.0118	28.5773	53.7278
G	-11.7422	-5.81684	-1.25118	59.1643	27.7442	21.3451	19.6132	129.596	30.2887	80.4182	19.9207	36.7288	33.7375	40.9599	27.0676	25.1964	18.1381	18.6884	3.59397	5.46513
P	20.7333	52.0066	5.22989	12.1965	28.6657	51.016	7.92439	20.4128	48.2201	42.1987	78.2428	141.681	30.7182	17.346	155.945	25.8212	24.1616	14.085	15.6248	27.1874

## Sheet: Means
mean normalised intensities
	A	R	N	D	C	Q	E	G	H	I	L	K	M	F	P	S	T	W	Y	V
K	34.4145	75.7619	39.6615	41.3998	23.0421	60.6099	47.4368	20.563	34.6108	17.2395	20.8483	34.1096	7.57971	7.11111	-6.88806	24.5881	20.3893	7.02232	7.53458	7.03325
T	27.7007	3.06927	-5.06856	8.31374	6.32371	1.72581	-3.26528	0.269581	2.48132	50.0158	12.2843	-4.69743	-1.40287	-0.541168	-11.6878	7.14164	63.0611	-2.87534	-0.11679	30.3401
L	-16.2535	2.82431	-3.04089	-4.8612	-5.17625	3.00433	-8.70237	-8.5299	-4.98545	31.3728	48.2507	-7.93608	-5.62857	5.29175	-10.2503	-5.35924	-5.18695	-8.64266	-8.80353	4.75198
E	63.6488	127.269	89.6111	75.1332	58.757	133.573	100.443	62.1989	48.8236	36.578	66.0424	143.993	99.7344	74.8606	-4.1286	67.5447	54.4835	75.0418	60.0964	39.6448
Q	51.8573	49.2133	59.6295	93.5952	39.207	111.828	89.1001	32.1078	57.5348	31.1009	60.5577	56.3361	80.4958	50.6933	-3.29515	46.3059	25.0787	90.9612	32.1391	5.70501
F	1.39352	-3.67177	1.24674	-0.993498	-4.73271	-6.05292	-6.91592	-5.27608	15.2106	2.90956	29.1968	2.76874	1.75162	90.2103	-4.79129	-3.91133	-5.01528	-1.18581	25.7751	-2.71279
H	73.9589	83.8636	61.5741	15.1294	67.9249	106.24	46.8874	66.1133	84.4428	108.54	140.591	154.196	131.851	121.107	-2.83776	63.1281	44.8575	52.4938	61.9822	47.0548
L	24.0134	73.2142	25.9556	2.0784	30.1665	91.6073	44.3475	17.1428	16.4591	79.3657	85.2003	149.069	121.039	136.947	-0.422812	29.0809	25.6988	6.62403	24.8538	39.1032
S	49.4409	65.4026	25.8141	3.66694	13.5653	91.6363	25.5007	23.5398	48.3928	92.8506	102.543	76.3368	64.1631	146.63	5.5169	61.0214	23.1234	28.8792	33.4804	42.3716
S	59.1716	24.2117	-0.385583	2.17814	3.80142	-3.18331	-2.22439	9.37305	3.4757	4.27586	9.07821	28.2357	13.1632	16.8065	9.90958	81.0663	0.300356	-0.662414	0.421164	-1.82342
M	42.3062	117.324	37.1769	12.8631	44.7689	132.939	41.1438	86.6643	63.7807	100.2	104.097	175.076	150.827	98.408	66.4186	58.1094	52.231	20.5561	5.8132	42.7651
S	59.1319	142.419	117.227	80.8805	87.4539	119.083	76.5505	96.2069	122.702	107.707	119.913	168.901	151.008	172.741	10.7567	108.068	67.1844	82.1375	97.3633	54.7707
S	22.752	71.5527	73.1638	12.6768	10.8343	43.1383	7.01453	80.5574	18.8909	23.0939	38.1617	52.6519	54.5527	60.0533	8.81322	104.198	35.5869	1.59446	7.03754	3.48494
L	7.32899	26.9025	17.0278	5.96672	9.77116	6.2498	-0.187939	6.4279	12.1241	65.0207	150.448	49.3495	23.9089	22.4971	16.9756	15.683	26.5118	28.7706	33.3755	14.4153
G	79.3616	144.806	79.466	74.2989	52.5542	144.614	66.7947	139.88	103.939	113.156	108.689	166.748	133.706	116.246	14.5665	104.054	49.859	77.8241	41.0426	47.0879
G	9.85887	9.20194	4.33075	35.4903	18.3024	15.0928	13.4938	138.195	15.4615	41.9854	13.139	23.2163	20.3573	25.532	16.5764	14.293	9.52538	13.65	4.11944	3.87108
P	31.7654	72.5263	6.49035	10.7286	26.2926	32.1304	8.76333	20.5857	26.9407	33.1012	64.8901	127.514	20.3228	13.6944	125.855	15.5504	13.8511	13.5825	14.129	26.4302
standard deviation
	A	R	N	D	C	Q	E	G	H	I	L	K	M	F	P	S	T	W	Y	V
K	13.4488	8.93667	10.4837	15.8935	24.1572	39.1341	25.0964	3.90247	3.5263	0.445114	0.774318	8.1862	2.92154	8.03071	16.4409	41.5218	32.8995	13.7866	3.1685	11.6147
T	15.4764	8.07104	7.57304	14.2471	9.28411	12.869	2.79811	3.33491	6.55769	4.41814	0.764088	0.791059	1.37281	10.1896	8.51307	27.2277	46.0724	2.59111	3.65001	25.5853
L	9.49886	4.07425	12.861	10.218	16.2201	6.85577	11.5569	8.95625	5.38636	13.0074	13.1985	5.46962	7.98819	4.67029	16.0368	9.12755	2.12693	3.56692	7.83981	6.22466
E	38.5566	46.5293	43.3574	14.6494	18.3641	28.9016	3.72305	11.7678	21.4623	1.36688	13.5592	29.7292	51.9846	54.2028	11.5348	64.1061	38.8528	0.91512	21.8537	13.2275
Q	25.9133	12.7114	28.3302	6.76375	1.31005	2.53558	4.85674	4.22986	0.638009	8.0078	23.0021	14.7448	15.1096	18.6379	1.4755	31.654	13.0555	21.3805	14.1119	1.08612
F	5.9423	8.54883	6.629	16.3211	12.6598	12.2517	12.2963	11.2062	13.7986	9.33233	18.4119	6.25195	1.59122	18.4553	6.1644	7.29744	14.0915	4.9179	2.90904	5.76173
H	31.6063	6.33191	15.8149	4.64978	6.6286	10.3272	1.90299	13.8165	7.55627	27.575	52.8346	35.989	49.6826	34.3852	9.19264	14.5638	20.5316	15.3743	10.2588	9.41723
L	7.33379	13.0938	9.19698	9.58759	1.46009	8.12474	11.533	6.58458	10.3744	3.71702	31.5142	15.2108	73.2028	53.9354	1.1959	17.6579	17.1874	7.4777	12.2017	7.20408
S	15.1031	24.2189	3.0131	6.49287	5.2107	8.20544	0.608812	3.71725	8.82972	17.5329	18.7295	36.0142	26.5715	36.4313	5.79912	10.9571	13.3423	13.8809	19.9347	19.1946
S	8.48993	2.41658	6.28155	9.33646	2.09415	10.2835	5.01793	8.87332	4.01418	9.09556	14.0975	15.2463	7.05991	13.4295	2.11412	9.39968	7.8651	4.7928	6.89139	5.07374
M	3.44531	30.3922	7.66808	1.0168	5.17463	19.4627	13.334	18.1881	17.4828	31.4792	26.2665	4.25399	27.4432	18.1677	24.8651	13.1542	15.1477	9.03106	19.5575	6.91178
S	4.1555	3.44257	63.1738	14.2545	3.69609	18.0687	23.1197	15.8228	24.807	41.0916	43.245	9.90971	19.3794	11.7753	2.32987	39.2918	16.6583	27.3599	37.2256	10.2209
S	5.30275	15.4138	43.8573	2.69187	6.1296	10.5951	15.5199	24.7346	0.485853	15.2599	29.7266	6.20664	4.15021	15.5097	2.78765	52.2225	8.55844	11.1862	19.2608	1.14449
L	9.16902	9.89816	15.9763	10.8547	1.1299	6.72107	6.96547	5.18591	13.5076	35.4231	38.749	42.3644	17.6997	21.7932	17.3488	13.5655	30.2408	25.6164	35.5537	20.2066
G	23.2129	13.2751	17.9504	34.0373	30.5664	20.1519	17.9392	22.6045	52.507	96.308	63.8552	5.61816	28.3587	20.4302	18.4042	68.6806	28.9714	13.8766	17.6287	9.39024
G	30.5485	21.2398	7.89404	33.4801	13.3527	8.84215	8.65407	12.161	20.9688	54.3522	9.59087	19.1095	18.9225	21.8184	14.8368	15.4198	12.1802	7.12542	0.743126	2.25433
P	15.6018	29.0192	1.78257	2.07593	3.35611	26.7083	1.18644	0.244543	30.0936	12.8658	18.8835	20.035	14.7014	5.16421	42.5549	14.5252	14.5812	0.710662	2.11548	1.07085
