# Supplementary material for: Mutations in SKI in Shprintzen–Goldberg syndrome lead to attenuated TGF-β responses through SKI stabilization
Source: eLife journal article supplement (doi:10.7554/elife.63545), 2021-01-08
Supplement: supp [file elife-63545-supp-v1.zip › elife_poa_e63545_Figure_5_figure_supplement_1.pdf]

A

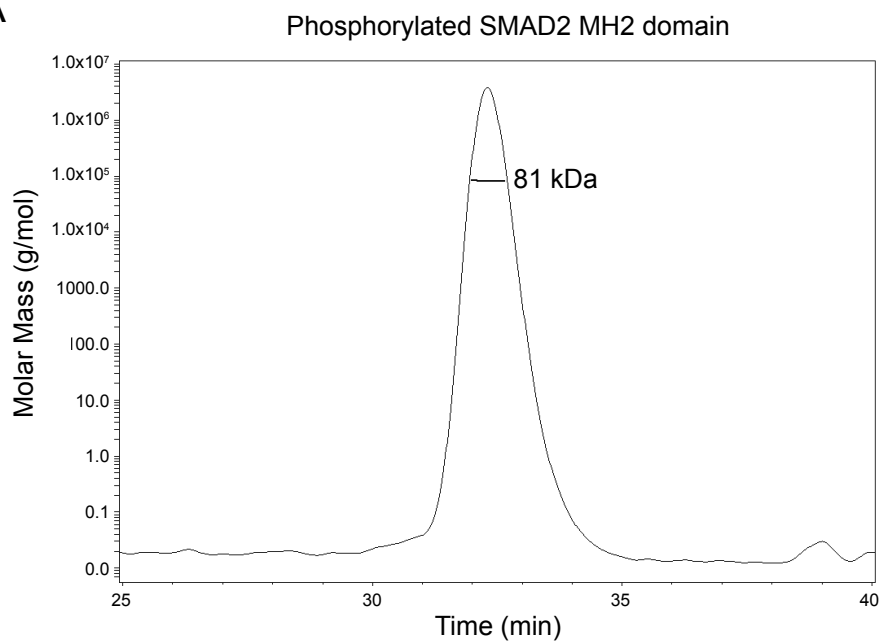

B

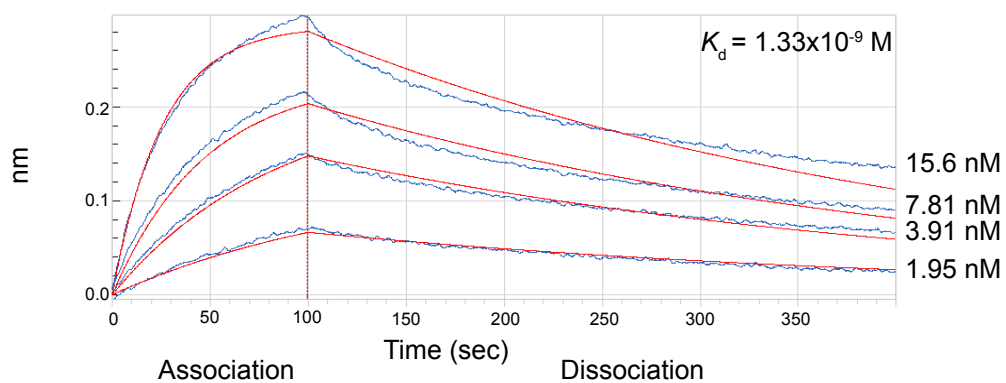

C

| Data collection and refinement statistics |                                    |
|-------------------------------------------|------------------------------------|
| Wavelength (Å)                            | 0.9686                             |
| Resolution range (Å)                      | 56.91 - 2.031 (2.104 - 2.031)      |
| Space group                               | I 2 <sub>1</sub> 3                 |
| Unit cell (Å)                             | 113.82, 113.82, 113.82, 90, 90, 90 |
| Total reflections                         | 159694 (15932)                     |
| Unique reflections                        | 15983 (1565)                       |
| Multiplicity                              | 10.0 (10.1)                        |
| Completeness (%)                          | 99.95 (100.00)                     |
| Mean I/sigma(I)                           | 12.24 (1.89)                       |
| Wilson B-factor                           | 37.09                              |
| R-merge                                   | 0.125 (1.469)                      |
| R-meas                                    | 0.1319 (1.547)                     |
| R-pim                                     | 0.04167 (0.4846)                   |
| CC1/2                                     | 0.998 (0.635)                      |
| CC*                                       | 1 (0.881)                          |
| Reflections used in refinement            | 15980 (1573)                       |
| Reflections used for R-free               | 744 (63)                           |
| R-work                                    | 0.1641 (0.2697)                    |
| R-free                                    | 0.2101 (0.2817)                    |
| CC(work)                                  | 0.972 (0.842)                      |
| CC(free)                                  | 0.952 (0.824)                      |
| Number of non-hydrogen atoms              | 1943                               |
| Macromolecules                            | 1779                               |
| Ligands                                   | 88                                 |
