# Supplementary material for: Mutations in SKI in Shprintzen–Goldberg syndrome lead to attenuated TGF-β responses through SKI stabilization
Source: eLife journal article supplement (doi:10.7554/elife.63545), 2021-01-08
Supplement: supp [file elife-63545-supp-v1.zip › elife_poa_e63545_Figure_6_source_data_1.xlsx]

## Sheet: Plotted data
		Lab nomenclature	Official nomenclature for publication
		HEK293T P35SSKI clone 5_66	293T P35S SKI clone 2
		HEK 293T P35SSKI clone 5_87	293T P35S SKI clone 3
	LUC/REN
	Experiment 1
	Treatment	parental	P35S SKI 293T clone 2	P35S SKI 293T clone 3
	SB	0.122801	0.0859973	0.194375
	Activin 2.5ng/ml 8h	0.922011	0.593956	0.681072
	Activin 5ng/ml 8h	1.53511	0.898368	1.35847
	Activin 10ng/ml 8h	1.37328	0.966719	1.26847
	Activin 20ng/ml 8h	1.72974	0.994736	0.902578
	Experiment 2
	Treatment	parental	P35S SKI 293T clone 2	P35S SKI 293T clone 3
	SB	0.147802	0.165618	0.0803081
	Activin 2.5ng/ml 8h	1.10283	0.563343	0.704208
	Activin 5ng/ml 8h	3.30548	1.70588	1.50753
	Activin 10ng/ml 8h	4.27489	2.19513	1.64759
	Activin 20ng/ml 8h	4.16219	2.69138	2.07226
	Experiment 3
	Treatment	parental	P35S SKI 293T clone 2	P35S SKI 293T clone 3
	SB	0.224373	0.188163	0.084474
	Activin 2.5ng/ml 8h	1.92662	1.13172	0.964545
	Activin 5ng/ml 8h	4.81546	2.4772	1.93877
	Activin 10ng/ml 8h	5.75677	2.82208	2.11332
	Activin 20ng/ml 8h	6.06563	2.9888	2.39131
	Experiment 4
	Treatment	parental	P35S SKI 293T clone 2	P35S SKI 293T clone 3
	SB	0.178802	0.17858	0.0660358
	Activin 2.5ng/ml 8h	2.077	1.00084	0.981288
	Activin 5ng/ml 8h	4.81629	2.62442	1.99524
	Activin 10ng/ml 8h	5.48314	2.6946	2.0346
	Activin 20ng/ml 8h	6.3075	3.22263	2.19206
	Experiment 5
	Treatment	parental	P35S SKI 293T clone 2	P35S SKI 293T clone 3
	SB	0.134326	0.199869	0.0355957
	Activin 2.5ng/ml 8h	1.10545	0.624612	0.453151
	Activin 5ng/ml 8h	3.07426	1.38456	0.488147
	Activin 10ng/ml 8h	3.30389	1.52185	1.02553
	Activin 20ng/ml 8h	3.49881	1.87263	0.98564
	Experiment 6
	Treatment	parental	P35S SKI 293T clone 2	P35S SKI 293T clone 3
	SB	0.145765	0.096013	0.041654
	Activin 2.5ng/ml 8h	1.40282	0.631536	0.493714
	Activin 5ng/ml 8h	3.00395	0.773507	0.826782
	Activin 10ng/ml 8h	3.64383	1.7632	1.08607
	Activin 20ng/ml 8h	4.19341	1.99489	1.3503
	Experiment 7
	Treatment	parental	P35S SKI 293T clone 2	P35S SKI 293T clone 3
	SB	0.156527	0.0998706	0.0333493
	Activin 2.5ng/ml 8h	1.35018	0.617885	0.49541
	Activin 5ng/ml 8h	2.87937	1.29418	0.955865
	Activin 10ng/ml 8h	2.71298	1.63405	0.94098
	Activin 20ng/ml 8h	3.88098	1.89086	1.29981
	AVERAGE	AVERAGE	AVERAGE	AVERAGE
	Treatment	parental	P35S SKI 293T clone 2	P35S SKI 293T clone 3
	SB	0.158628	0.144873	0.0765417
	Activin 2.5ng/ml 8h	1.41242	0.737698	0.681912
	Activin 5ng/ml 8h	3.34713	1.59402	1.29583
	Activin 10ng/ml 8h	3.79268	1.94252	1.44522
	Activin 20ng/ml 8h	4.26261	2.23656	1.59914
	STDEV	parental	P35S SKI 293T clone 2	P35S SKI 293T clone 3
	SB	0.0338886	0.0488945	0.056023
	Activin 2.5ng/ml 8h	0.436006	0.228754	0.220809
	Activin 5ng/ml 8h	1.15547	0.724015	0.56851
	Activin 10ng/ml 8h	1.53992	0.665773	0.487393
	Activin 20ng/ml 8h	1.55947	0.774333	0.607732

## Sheet: Experiment 1
LUC_30		12.06.2019	20000 stable cells expressing GACA luc into 96 well plates
		13.06.2019	serum starved 0.5% FBS add SB o/N
		14.06.2019	treate activin
				Cell lines	Treatment	LUC	REN	LUC/Ren	Average LUC/Ren
			1	parental 293T CAGA luc/ renilla	SB	6120	47480	0.128896	0.122801
			2	parental 293T CAGA luc/ renilla	SB	6520	69560	0.093732
			3	parental 293T CAGA luc/ renilla	SB	6600	52640	0.12538
			4	parental 293T CAGA luc/ renilla	SB	7280	50840	0.143194
			9	parental 293T CAGA luc/ renilla	Activin 2.5ng/ml 8h	87320	104680	0.834161	0.922011
			10	parental 293T CAGA luc/ renilla	Activin 2.5ng/ml 8h	115840	136720	0.847279
			11	parental 293T CAGA luc/ renilla	Activin 2.5ng/ml 8h	109440	121560	0.900296
			12	parental 293T CAGA luc/ renilla	Activin 2.5ng/ml 8h	113640	102720	1.10631
			13	parental 293T CAGA luc/ renilla	Activin 5ng/ml 8h	102680	65160	1.57581	1.53511
			14	parental 293T CAGA luc/ renilla	Activin 5ng/ml 8h	105560	65280	1.61703
			15	parental 293T CAGA luc/ renilla	Activin 5ng/ml 8h	120360	83800	1.43628
			16	parental 293T CAGA luc/ renilla	Activin 5ng/ml 8h	133720	88480	1.5113
			17	parental 293T CAGA luc/ renilla	Activin 10ng/ml 8h	186520	103720	1.7983	1.37328
			18	parental 293T CAGA luc/ renilla	Activin 10ng/ml 8h	115880	93600	1.23803
			19	parental 293T CAGA luc/ renilla	Activin 10ng/ml 8h	117400	81760	1.43591
			20	parental 293T CAGA luc/ renilla	Activin 10ng/ml 8h	105720	103560	1.02086
			21	parental 293T CAGA luc/ renilla	Activin 20ng/ml 8h	188960	115560	1.63517	1.72974
			22	parental 293T CAGA luc/ renilla	Activin 20ng/ml 8h	178280	120760	1.47632
			23	parental 293T CAGA luc/ renilla	Activin 20ng/ml 8h	193720	99200	1.95282
			24	parental 293T CAGA luc/ renilla	Activin 20ng/ml 8h	213880	115320	1.85467
			25	P35S SKI 293T clone 5_66- CAGAluc/ren	SB	3880	44280	0.0876242	0.0859973
			26	P35S SKI 293T clone 5_66- CAGAluc/ren	SB	4600	48160	0.095515
			27	P35S SKI 293T clone 5_66- CAGAluc/ren	SB	4560	49520	0.092084
			28	P35S SKI 293T clone 5_66- CAGAluc/ren	SB	4280	62240	0.0687661
			33	P35S SKI 293T clone 5_66- CAGAluc/ren	Activin 2.5ng/ml 8h	37120	63200	0.587342	0.593956
			34	P35S SKI 293T clone 5_66- CAGAluc/ren	Activin 2.5ng/ml 8h	53960	124600	0.433066
			35	P35S SKI 293T clone 5_66- CAGAluc/ren	Activin 2.5ng/ml 8h	44960	76640	0.586639
			36	P35S SKI 293T clone 5_66- CAGAluc/ren	Activin 2.5ng/ml 8h	67960	88400	0.768778
			37	P35S SKI 293T clone 5_66- CAGAluc/ren	Activin 5ng/ml 8h	76360	70280	1.08651	0.898368
			38	P35S SKI 293T clone 5_66- CAGAluc/ren	Activin 5ng/ml 8h	67440	89120	0.756732
			39	P35S SKI 293T clone 5_66- CAGAluc/ren	Activin 5ng/ml 8h	68680	72320	0.949668
			40	P35S SKI 293T clone 5_66- CAGAluc/ren	Activin 5ng/ml 8h	68720	85840	0.800559
			41	P35S SKI 293T clone 5_66- CAGAluc/ren	Activin 10ng/ml 8h	79080	71480	1.10632	0.966719
			42	P35S SKI 293T clone 5_66- CAGAluc/ren	Activin 10ng/ml 8h	74040	77880	0.950693
			43	P35S SKI 293T clone 5_66- CAGAluc/ren	Activin 10ng/ml 8h	79960	95720	0.835353
			44	P35S SKI 293T clone 5_66- CAGAluc/ren	Activin 10ng/ml 8h	74920	76880	0.974506
			45	P35S SKI 293T clone 5_66- CAGAluc/ren	Activin 20ng/ml 8h	84600	96120	0.88015	0.994736
			46	P35S SKI 293T clone 5_66- CAGAluc/ren	Activin 20ng/ml 8h	118400	110920	1.06744
			47	P35S SKI 293T clone 5_66- CAGAluc/ren	Activin 20ng/ml 8h	96440	91680	1.05192
			48	P35S SKI 293T clone 5_66- CAGAluc/ren	Activin 20ng/ml 8h	87640	89480	0.979437
			49	P35S SKI 293T clone 5_87 CAGAluc/ren	SB	3760	30360	0.123847	0.194375
			50	P35S SKI 293T clone 5_87 CAGAluc/ren	SB	15600	35400	0.440678
			51	P35S SKI 293T clone 5_87 CAGAluc/ren	SB	10560	92880	0.113695
			52	P35S SKI 293T clone 5_87 CAGAluc/ren	SB	4960	49960	0.0992794
			57	P35S SKI 293T clone 5_87 CAGAluc/ren	Activin 2.5ng/ml 8h	64280	75920	0.846681	0.681072
			58	P35S SKI 293T clone 5_87 CAGAluc/ren	Activin 2.5ng/ml 8h	52160	76720	0.679875
			59	P35S SKI 293T clone 5_87 CAGAluc/ren	Activin 2.5ng/ml 8h	64040	126080	0.507931
			60	P35S SKI 293T clone 5_87 CAGAluc/ren	Activin 2.5ng/ml 8h	59240	85880	0.6898
			61	P35S SKI 293T clone 5_87 CAGAluc/ren	Activin 5ng/ml 8h	98760	60720	1.62648	1.35847
			62	P35S SKI 293T clone 5_87 CAGAluc/ren	Activin 5ng/ml 8h	79480	68240	1.16471
			63	P35S SKI 293T clone 5_87 CAGAluc/ren	Activin 5ng/ml 8h	107240	67240	1.59488
			64	P35S SKI 293T clone 5_87 CAGAluc/ren	Activin 5ng/ml 8h	67520	64440	1.0478
			65	P35S SKI 293T clone 5_87 CAGAluc/ren	Activin 10ng/ml 8h	77800	45240	1.71972	1.26847
			66	P35S SKI 293T clone 5_87 CAGAluc/ren	Activin 10ng/ml 8h	82280	65640	1.2535
			67	P35S SKI 293T clone 5_87 CAGAluc/ren	Activin 10ng/ml 8h	79200	65920	1.20146
			68	P35S SKI 293T clone 5_87 CAGAluc/ren	Activin 10ng/ml 8h	89560	99600	0.899197
			69	P35S SKI 293T clone 5_87 CAGAluc/ren	Activin 20ng/ml 8h	63520	47600	1.33445	0.902578
			70	P35S SKI 293T clone 5_87 CAGAluc/ren	Activin 20ng/ml 8h	62960	77920	0.808008
			71	P35S SKI 293T clone 5_87 CAGAluc/ren	Activin 20ng/ml 8h	66440	95760	0.693818
			72	P35S SKI 293T clone 5_87 CAGAluc/ren	Activin 20ng/ml 8h	49600	64080	0.774032

## Sheet: Experiment 2
LUC_32		8.07.2019	20000 stable cells expressing GACA luc into 96 well plates
		9.07.2019	serum starved 0.5% FBS add SB o/N or OPTMEM
		10.07.2019	treate activin
				Cell lines	Treatment	LUC	REN	LUC/Ren	Average LUC/Ren
			1	parental 293T CAGA luc/ renilla	SB	5640	55760	0.101148	0.147802
			2	parental 293T CAGA luc/ renilla	SB	10440	44120	0.236627
			3	parental 293T CAGA luc/ renilla	SB	5400	44240	0.122061
			4	parental 293T CAGA luc/ renilla	SB	8040	61200	0.131373
			9	parental 293T CAGA luc/ renilla	Activin 2.5ng/ml 8h	106800	101960	1.04747	1.10283
			10	parental 293T CAGA luc/ renilla	Activin 2.5ng/ml 8h	125240	118520	1.0567
			11	parental 293T CAGA luc/ renilla	Activin 2.5ng/ml 8h	116560	100520	1.15957
			12	parental 293T CAGA luc/ renilla	Activin 2.5ng/ml 8h	146800	127920	1.14759
			13	parental 293T CAGA luc/ renilla	Activin 5ng/ml 8h	314920	81760	3.85176	3.30548
			14	parental 293T CAGA luc/ renilla	Activin 5ng/ml 8h	249880	73040	3.42114
			15	parental 293T CAGA luc/ renilla	Activin 5ng/ml 8h	250960	93600	2.6812
			16	parental 293T CAGA luc/ renilla	Activin 5ng/ml 8h	262080	80200	3.26783
			17	parental 293T CAGA luc/ renilla	Activin 10ng/ml 8h	328200	73720	4.45198	4.27489
			18	parental 293T CAGA luc/ renilla	Activin 10ng/ml 8h	318480	89040	3.57682
			19	parental 293T CAGA luc/ renilla	Activin 10ng/ml 8h	318520	77480	4.111
			20	parental 293T CAGA luc/ renilla	Activin 10ng/ml 8h	384680	77560	4.95977
			21	parental 293T CAGA luc/ renilla	Activin 20ng/ml 8h	399200	95960	4.16007	4.16219
			22	parental 293T CAGA luc/ renilla	Activin 20ng/ml 8h	454440	109360	4.15545
			23	parental 293T CAGA luc/ renilla	Activin 20ng/ml 8h	399800	109200	3.66117
			24	parental 293T CAGA luc/ renilla	Activin 20ng/ml 8h	461040	98680	4.67207
			25	P35S SKI 293T clone 5_66- CAGAluc/ren	SB	14600	93120	0.156787	0.16964
			26	P35S SKI 293T clone 5_66- CAGAluc/ren	SB	14320	70360	0.203525
			27	P35S SKI 293T clone 5_66- CAGAluc/ren	SB	10040	67560	0.148609
			33	P35S SKI 293T clone 5_66- CAGAluc/ren	Activin 2.5ng/ml 8h	74800	145320	0.514726	0.563343
			34	P35S SKI 293T clone 5_66- CAGAluc/ren	Activin 2.5ng/ml 8h	83680	132200	0.63298
			35	P35S SKI 293T clone 5_66- CAGAluc/ren	Activin 2.5ng/ml 8h	72280	134200	0.538599
			36	P35S SKI 293T clone 5_66- CAGAluc/ren	Activin 2.5ng/ml 8h	79480	140160	0.567066
			37	P35S SKI 293T clone 5_66- CAGAluc/ren	Activin 5ng/ml 8h	203720	115440	1.76473	1.70588
			38	P35S SKI 293T clone 5_66- CAGAluc/ren	Activin 5ng/ml 8h	159960	86480	1.84968
			39	P35S SKI 293T clone 5_66- CAGAluc/ren	Activin 5ng/ml 8h	84120	56360	1.49255
			40	P35S SKI 293T clone 5_66- CAGAluc/ren	Activin 5ng/ml 8h	188960	110080	1.71657
			41	P35S SKI 293T clone 5_66- CAGAluc/ren	Activin 10ng/ml 8h	306920	135360	2.26743	2.19513
			42	P35S SKI 293T clone 5_66- CAGAluc/ren	Activin 10ng/ml 8h	280480	130560	2.14828
			43	P35S SKI 293T clone 5_66- CAGAluc/ren	Activin 10ng/ml 8h	264000	122400	2.15686
			44	P35S SKI 293T clone 5_66- CAGAluc/ren	Activin 10ng/ml 8h	262480	118880	2.20794
			45	P35S SKI 293T clone 5_66- CAGAluc/ren	Activin 20ng/ml 8h	335920	130360	2.57686	2.69138
			46	P35S SKI 293T clone 5_66- CAGAluc/ren	Activin 20ng/ml 8h	385640	140160	2.75143
			47	P35S SKI 293T clone 5_66- CAGAluc/ren	Activin 20ng/ml 8h	361720	134800	2.68338
			48	P35S SKI 293T clone 5_66- CAGAluc/ren	Activin 20ng/ml 8h	380360	138120	2.75384
			49	P35S SKI 293T clone 5_87 CAGAluc/ren	SB	3000	56080	0.053495	0.0803081
			50	P35S SKI 293T clone 5_87 CAGAluc/ren	SB	5240	56360	0.0929737
			51	P35S SKI 293T clone 5_87 CAGAluc/ren	SB	3920	43680	0.0897436
			52	P35S SKI 293T clone 5_87 CAGAluc/ren	SB	3360	39520	0.0850202
			57	P35S SKI 293T clone 5_87 CAGAluc/ren	Activin 2.5ng/ml 8h	50760	80280	0.632287	0.704208
			58	P35S SKI 293T clone 5_87 CAGAluc/ren	Activin 2.5ng/ml 8h	38840	74680	0.520086
			59	P35S SKI 293T clone 5_87 CAGAluc/ren	Activin 2.5ng/ml 8h	49120	56320	0.872159
			60	P35S SKI 293T clone 5_87 CAGAluc/ren	Activin 2.5ng/ml 8h	54320	68560	0.792299
			61	P35S SKI 293T clone 5_87 CAGAluc/ren	Activin 5ng/ml 8h	103120	72240	1.42746	1.50753
			62	P35S SKI 293T clone 5_87 CAGAluc/ren	Activin 5ng/ml 8h	112720	66200	1.70272
			63	P35S SKI 293T clone 5_87 CAGAluc/ren	Activin 5ng/ml 8h	92520	59640	1.55131
			64	P35S SKI 293T clone 5_87 CAGAluc/ren	Activin 5ng/ml 8h	107080	79400	1.34861
			65	P35S SKI 293T clone 5_87 CAGAluc/ren	Activin 10ng/ml 8h	105120	99800	1.05331	1.64759
			66	P35S SKI 293T clone 5_87 CAGAluc/ren	Activin 10ng/ml 8h	136280	72120	1.88963
			67	P35S SKI 293T clone 5_87 CAGAluc/ren	Activin 10ng/ml 8h	121680	62000	1.96258
			68	P35S SKI 293T clone 5_87 CAGAluc/ren	Activin 10ng/ml 8h	140920	83640	1.68484
			69	P35S SKI 293T clone 5_87 CAGAluc/ren	Activin 20ng/ml 8h	139000	52680	2.63857	2.07226
			70	P35S SKI 293T clone 5_87 CAGAluc/ren	Activin 20ng/ml 8h	119720	83520	1.43343
			71	P35S SKI 293T clone 5_87 CAGAluc/ren	Activin 20ng/ml 8h	181400	76720	2.36444
			72	P35S SKI 293T clone 5_87 CAGAluc/ren	Activin 20ng/ml 8h	193560	104480	1.8526

## Sheet: Experiment3
LUC_34		10.07.2019	20000 stable cells expressing GACA luc into 96 well plates
		11.07.2019	serum starved 0.5% FBS add SB o/N or OPTMEM
		12.07.2019	treate activin
				Cell lines	Treatment	LUC	REN	LUC/Ren	Average LUC/Ren
			1	parental 293T CAGA luc/ renilla	SB	25200	109320	0.230516	0.224373
			2	parental 293T CAGA luc/ renilla	SB	27200	109240	0.248993
			3	parental 293T CAGA luc/ renilla	SB	23520	106000	0.221887
			4	parental 293T CAGA luc/ renilla	SB	26120	133200	0.196096
			9	parental 293T CAGA luc/ renilla	Activin 2.5ng/ml 8h	272000	135160	2.01243	1.92662
			10	parental 293T CAGA luc/ renilla	Activin 2.5ng/ml 8h	274040	135040	2.02932
			11	parental 293T CAGA luc/ renilla	Activin 2.5ng/ml 8h	338560	192680	1.75711
			12	parental 293T CAGA luc/ renilla	Activin 2.5ng/ml 8h	354280	185720	1.9076
			13	parental 293T CAGA luc/ renilla	Activin 5ng/ml 8h	709520	146320	4.8491	4.81546
			14	parental 293T CAGA luc/ renilla	Activin 5ng/ml 8h	555480	108640	5.11303
			15	parental 293T CAGA luc/ renilla	Activin 5ng/ml 8h	509120	102360	4.97382
			16	parental 293T CAGA luc/ renilla	Activin 5ng/ml 8h	581920	134520	4.3259
			17	parental 293T CAGA luc/ renilla	Activin 10ng/ml 8h	742000	103880	7.14286	5.75677
			18	parental 293T CAGA luc/ renilla	Activin 10ng/ml 8h	800160	150200	5.3273
			19	parental 293T CAGA luc/ renilla	Activin 10ng/ml 8h	821440	161680	5.08065
			20	parental 293T CAGA luc/ renilla	Activin 10ng/ml 8h	899640	164280	5.47626
			21	parental 293T CAGA luc/ renilla	Activin 20ng/ml 8h	1054440	186400	5.65687	6.06563
			22	parental 293T CAGA luc/ renilla	Activin 20ng/ml 8h	604280	94800	6.37426
			23	parental 293T CAGA luc/ renilla	Activin 20ng/ml 8h	939240	168280	5.58141
			24	parental 293T CAGA luc/ renilla	Activin 20ng/ml 8h	1472840	221480	6.64999
			25	P35S SKI 293T clone 5_66- CAGAluc/ren	SB	22960	125320	0.183211	0.188163
			26	P35S SKI 293T clone 5_66- CAGAluc/ren	SB	14600	89120	0.163824
			27	P35S SKI 293T clone 5_66- CAGAluc/ren	SB	19080	111800	0.170662
			28	P35S SKI 293T clone 5_66- CAGAluc/ren	SB	36080	153560	0.234957
			33	P35S SKI 293T clone 5_66- CAGAluc/ren	Activin 2.5ng/ml 8h	159760	149400	1.06934	1.13172
			34	P35S SKI 293T clone 5_66- CAGAluc/ren	Activin 2.5ng/ml 8h	162960	153560	1.06121
			35	P35S SKI 293T clone 5_66- CAGAluc/ren	Activin 2.5ng/ml 8h	196560	169520	1.15951
			36	P35S SKI 293T clone 5_66- CAGAluc/ren	Activin 2.5ng/ml 8h	204520	165360	1.23682
			37	P35S SKI 293T clone 5_66- CAGAluc/ren	Activin 5ng/ml 8h	371320	143640	2.58507	2.4772
			38	P35S SKI 293T clone 5_66- CAGAluc/ren	Activin 5ng/ml 8h	311160	113480	2.74198
			39	P35S SKI 293T clone 5_66- CAGAluc/ren	Activin 5ng/ml 8h	297960	122120	2.4399
			40	P35S SKI 293T clone 5_66- CAGAluc/ren	Activin 5ng/ml 8h	360600	168360	2.14184
			41	P35S SKI 293T clone 5_66- CAGAluc/ren	Activin 10ng/ml 8h	471280	159400	2.95659	2.82208
			42	P35S SKI 293T clone 5_66- CAGAluc/ren	Activin 10ng/ml 8h	433880	167520	2.59002
			43	P35S SKI 293T clone 5_66- CAGAluc/ren	Activin 10ng/ml 8h	550640	190600	2.88898
			44	P35S SKI 293T clone 5_66- CAGAluc/ren	Activin 10ng/ml 8h	561760	196920	2.85273
			45	P35S SKI 293T clone 5_66- CAGAluc/ren	Activin 20ng/ml 8h	564880	191240	2.95378	2.9888
			46	P35S SKI 293T clone 5_66- CAGAluc/ren	Activin 20ng/ml 8h	481120	145320	3.31076
			47	P35S SKI 293T clone 5_66- CAGAluc/ren	Activin 20ng/ml 8h	498440	171200	2.91145
			48	P35S SKI 293T clone 5_66- CAGAluc/ren	Activin 20ng/ml 8h	598200	215240	2.77922
			49	P35S SKI 293T clone 5_87 CAGAluc/ren	SB	8600	78840	0.109082	0.084474
			50	P35S SKI 293T clone 5_87 CAGAluc/ren	SB	6880	92880	0.0740741
			51	P35S SKI 293T clone 5_87 CAGAluc/ren	SB	7920	87880	0.0901229
			52	P35S SKI 293T clone 5_87 CAGAluc/ren	SB	7400	114520	0.0646175
			57	P35S SKI 293T clone 5_87 CAGAluc/ren	Activin 2.5ng/ml 8h	91720	82200	1.11582	0.964545
			58	P35S SKI 293T clone 5_87 CAGAluc/ren	Activin 2.5ng/ml 8h	128400	163880	0.7835
			59	P35S SKI 293T clone 5_87 CAGAluc/ren	Activin 2.5ng/ml 8h	111080	141960	0.782474
			60	P35S SKI 293T clone 5_87 CAGAluc/ren	Activin 2.5ng/ml 8h	136320	115880	1.17639
			61	P35S SKI 293T clone 5_87 CAGAluc/ren	Activin 5ng/ml 8h	183400	116360	1.57614	1.93877
			62	P35S SKI 293T clone 5_87 CAGAluc/ren	Activin 5ng/ml 8h	177920	84280	2.11106
			63	P35S SKI 293T clone 5_87 CAGAluc/ren	Activin 5ng/ml 8h	194000	85360	2.27273
			64	P35S SKI 293T clone 5_87 CAGAluc/ren	Activin 5ng/ml 8h	190000	105840	1.79516
			65	P35S SKI 293T clone 5_87 CAGAluc/ren	Activin 10ng/ml 8h	213480	102960	2.07343	2.11332
			66	P35S SKI 293T clone 5_87 CAGAluc/ren	Activin 10ng/ml 8h	234160	106200	2.2049
			67	P35S SKI 293T clone 5_87 CAGAluc/ren	Activin 10ng/ml 8h	247520	116680	2.12136
			68	P35S SKI 293T clone 5_87 CAGAluc/ren	Activin 10ng/ml 8h	297280	144760	2.05361
			69	P35S SKI 293T clone 5_87 CAGAluc/ren	Activin 20ng/ml 8h	253000	107000	2.36449	2.39131
			70	P35S SKI 293T clone 5_87 CAGAluc/ren	Activin 20ng/ml 8h	244160	94760	2.57661
			71	P35S SKI 293T clone 5_87 CAGAluc/ren	Activin 20ng/ml 8h	179560	52080	3.44777
			72	P35S SKI 293T clone 5_87 CAGAluc/ren	Activin 20ng/ml 8h	148880	126560	1.17636

## Sheet: Experiment 4
LUC_35		1207.2	20000 stable cells expressing GACA luc into 96 well plates
		13.07.2019	serum starved 0.5% FBS add SB o/N or OPTMEM
		14.07.2019	treate activin
				Cell lines	Treatment	LUC	REN	LUC/Ren	Average LUC/Ren
			1	parental 293T CAGA luc/ renilla	SB	14120	100120	0.141031	0.178802
			2	parental 293T CAGA luc/ renilla	SB	21880	107800	0.202968
			3	parental 293T CAGA luc/ renilla	SB	25640	132560	0.193422
			4	parental 293T CAGA luc/ renilla	SB	21960	123520	0.177785
			9	parental 293T CAGA luc/ renilla	Activin 2.5ng/ml 8h	319800	145440	2.19884	2.077
			10	parental 293T CAGA luc/ renilla	Activin 2.5ng/ml 8h	327520	167680	1.95324
			11	parental 293T CAGA luc/ renilla	Activin 2.5ng/ml 8h	288520	154080	1.87253
			12	parental 293T CAGA luc/ renilla	Activin 2.5ng/ml 8h	381600	167120	2.28339
			13	parental 293T CAGA luc/ renilla	Activin 5ng/ml 8h	616880	114480	5.38854	4.81629
			14	parental 293T CAGA luc/ renilla	Activin 5ng/ml 8h	583880	132240	4.41531
			15	parental 293T CAGA luc/ renilla	Activin 5ng/ml 8h	618800	126480	4.89247
			16	parental 293T CAGA luc/ renilla	Activin 5ng/ml 8h	460720	100840	4.56882
			17	parental 293T CAGA luc/ renilla	Activin 10ng/ml 8h	715800	130960	5.46579	5.48314
			18	parental 293T CAGA luc/ renilla	Activin 10ng/ml 8h	649320	141680	4.583
			19	parental 293T CAGA luc/ renilla	Activin 10ng/ml 8h	752080	125600	5.9879
			20	parental 293T CAGA luc/ renilla	Activin 10ng/ml 8h	613640	104080	5.89585
			21	parental 293T CAGA luc/ renilla	Activin 20ng/ml 8h	1008600	156960	6.42584	6.3075
			22	parental 293T CAGA luc/ renilla	Activin 20ng/ml 8h	882360	146960	6.00408
			23	parental 293T CAGA luc/ renilla	Activin 20ng/ml 8h	1025800	159640	6.42571
			24	parental 293T CAGA luc/ renilla	Activin 20ng/ml 8h	1137440	178440	6.37436
			25	P35S SKI 293T clone 5_66- CAGAluc/ren	SB	21840	133000	0.164211	0.17858
			26	P35S SKI 293T clone 5_66- CAGAluc/ren	SB	22960	103760	0.22128
			27	P35S SKI 293T clone 5_66- CAGAluc/ren	SB	18800	107520	0.174851
			28	P35S SKI 293T clone 5_66- CAGAluc/ren	SB	21200	137680	0.15398
			33	P35S SKI 293T clone 5_66- CAGAluc/ren	Activin 2.5ng/ml 8h	151120	141080	1.07117	1.00084
			34	P35S SKI 293T clone 5_66- CAGAluc/ren	Activin 2.5ng/ml 8h	162480	160040	1.01525
			35	P35S SKI 293T clone 5_66- CAGAluc/ren	Activin 2.5ng/ml 8h	160800	172160	0.934015
			36	P35S SKI 293T clone 5_66- CAGAluc/ren	Activin 2.5ng/ml 8h	188760	192040	0.98292
			37	P35S SKI 293T clone 5_66- CAGAluc/ren	Activin 5ng/ml 8h	346720	107600	3.2223	2.62442
			38	P35S SKI 293T clone 5_66- CAGAluc/ren	Activin 5ng/ml 8h	275120	93920	2.9293
			39	P35S SKI 293T clone 5_66- CAGAluc/ren	Activin 5ng/ml 8h	296280	128680	2.30246
			40	P35S SKI 293T clone 5_66- CAGAluc/ren	Activin 5ng/ml 8h	296160	144920	2.04361
			41	P35S SKI 293T clone 5_66- CAGAluc/ren	Activin 10ng/ml 8h	411280	144920	2.83798	2.6946
			42	P35S SKI 293T clone 5_66- CAGAluc/ren	Activin 10ng/ml 8h	370280	148280	2.49717
			43	P35S SKI 293T clone 5_66- CAGAluc/ren	Activin 10ng/ml 8h	512400	189640	2.70196
			44	P35S SKI 293T clone 5_66- CAGAluc/ren	Activin 10ng/ml 8h	342880	125080	2.74129
			45	P35S SKI 293T clone 5_66- CAGAluc/ren	Activin 20ng/ml 8h	482400	137000	3.52117	3.22263
			46	P35S SKI 293T clone 5_66- CAGAluc/ren	Activin 20ng/ml 8h	489720	165640	2.95653
			47	P35S SKI 293T clone 5_66- CAGAluc/ren	Activin 20ng/ml 8h	509680	166640	3.05857
			48	P35S SKI 293T clone 5_66- CAGAluc/ren	Activin 20ng/ml 8h	562440	167680	3.35425
			49	P35S SKI 293T clone 5_87 CAGAluc/ren	SB	7640	96680	0.0790236	0.0660358
			50	P35S SKI 293T clone 5_87 CAGAluc/ren	SB	5160	83080	0.0621088
			51	P35S SKI 293T clone 5_87 CAGAluc/ren	SB	6440	90720	0.0709877
			52	P35S SKI 293T clone 5_87 CAGAluc/ren	SB	3240	62280	0.0520231
			57	P35S SKI 293T clone 5_87 CAGAluc/ren	Activin 2.5ng/ml 8h	115400	108840	1.06027	0.981288
			58	P35S SKI 293T clone 5_87 CAGAluc/ren	Activin 2.5ng/ml 8h	104040	179600	0.579287
			59	P35S SKI 293T clone 5_87 CAGAluc/ren	Activin 2.5ng/ml 8h	104760	78320	1.33759
			60	P35S SKI 293T clone 5_87 CAGAluc/ren	Activin 2.5ng/ml 8h	115960	122320	0.948005
			61	P35S SKI 293T clone 5_87 CAGAluc/ren	Activin 5ng/ml 8h	192760	104080	1.85204	1.99524
			62	P35S SKI 293T clone 5_87 CAGAluc/ren	Activin 5ng/ml 8h	169360	82280	2.05834
			63	P35S SKI 293T clone 5_87 CAGAluc/ren	Activin 5ng/ml 8h	151920	81160	1.87186
			64	P35S SKI 293T clone 5_87 CAGAluc/ren	Activin 5ng/ml 8h	192520	87560	2.19872
			65	P35S SKI 293T clone 5_87 CAGAluc/ren	Activin 10ng/ml 8h	193120	116760	1.65399	2.0346
			66	P35S SKI 293T clone 5_87 CAGAluc/ren	Activin 10ng/ml 8h	242840	122680	1.97946
			67	P35S SKI 293T clone 5_87 CAGAluc/ren	Activin 10ng/ml 8h	278160	136800	2.03333
			68	P35S SKI 293T clone 5_87 CAGAluc/ren	Activin 10ng/ml 8h	287400	116280	2.47162
			69	P35S SKI 293T clone 5_87 CAGAluc/ren	Activin 20ng/ml 8h	272480	145680	1.8704	2.19206
			70	P35S SKI 293T clone 5_87 CAGAluc/ren	Activin 20ng/ml 8h	267360	113920	2.34691
			71	P35S SKI 293T clone 5_87 CAGAluc/ren	Activin 20ng/ml 8h	274360	118440	2.31645
			72	P35S SKI 293T clone 5_87 CAGAluc/ren	Activin 20ng/ml 8h	259200	116000	2.23448

## Sheet: Experiment 5
LUC_36		15.07.2019	20000 stable cells expressing GACA luc into 96 well plates
		16.07.2019	serum starved 0.5% FBS add SB o/N or OPTMEM
		17.07.2019	treate activin
				Cell lines	Treatment	LUC	REN	LUC/Ren	Average LUC/Ren
			1	parental 293T CAGA luc/ renilla	SB	5360	58800	0.0911565	0.134326
			2	parental 293T CAGA luc/ renilla	SB	12680	78520	0.161488
			3	parental 293T CAGA luc/ renilla	SB	8000	49800	0.160643
			4	parental 293T CAGA luc/ renilla	SB	5680	45800	0.124017
			9	parental 293T CAGA luc/ renilla	Activin 2.5ng/ml 8h	222200	170040	1.30675	1.10545
			10	parental 293T CAGA luc/ renilla	Activin 2.5ng/ml 8h	134640	155520	0.865741
			11	parental 293T CAGA luc/ renilla	Activin 2.5ng/ml 8h	223520	192560	1.16078
			12	parental 293T CAGA luc/ renilla	Activin 2.5ng/ml 8h	231640	212800	1.08853
			13	parental 293T CAGA luc/ renilla	Activin 5ng/ml 8h	420160	110160	3.81409	3.07426
			14	parental 293T CAGA luc/ renilla	Activin 5ng/ml 8h	395760	135360	2.92376
			15	parental 293T CAGA luc/ renilla	Activin 5ng/ml 8h	118960	41160	2.89018
			16	parental 293T CAGA luc/ renilla	Activin 5ng/ml 8h	351240	131600	2.669
			17	parental 293T CAGA luc/ renilla	Activin 10ng/ml 8h	487880	132640	3.67823	3.30389
			18	parental 293T CAGA luc/ renilla	Activin 10ng/ml 8h	504600	150320	3.35684
			19	parental 293T CAGA luc/ renilla	Activin 10ng/ml 8h	468280	162520	2.88137
			20	parental 293T CAGA luc/ renilla	Activin 10ng/ml 8h	488800	148160	3.29914
			21	parental 293T CAGA luc/ renilla	Activin 20ng/ml 8h	599200	170200	3.52056	3.49881
			22	parental 293T CAGA luc/ renilla	Activin 20ng/ml 8h	668840	195960	3.41315
			23	parental 293T CAGA luc/ renilla	Activin 20ng/ml 8h	702640	199520	3.52165
			24	parental 293T CAGA luc/ renilla	Activin 20ng/ml 8h	807520	228120	3.53989
			25	P35S SKI 293T clone 5_66- CAGAluc/ren	SB	5560	95560	0.0581833	0.199869
			26	P35S SKI 293T clone 5_66- CAGAluc/ren	SB	7200	88840	0.0810446
			27	P35S SKI 293T clone 5_66- CAGAluc/ren	SB	3560	34720	0.102535
			28	P35S SKI 293T clone 5_66- CAGAluc/ren	SB	59720	107080	0.557714
			33	P35S SKI 293T clone 5_66- CAGAluc/ren	Activin 2.5ng/ml 8h	111920	205120	0.545632	0.624612
			34	P35S SKI 293T clone 5_66- CAGAluc/ren	Activin 2.5ng/ml 8h	120160	198400	0.605645
			35	P35S SKI 293T clone 5_66- CAGAluc/ren	Activin 2.5ng/ml 8h	124840	184920	0.675103
			36	P35S SKI 293T clone 5_66- CAGAluc/ren	Activin 2.5ng/ml 8h	137720	204920	0.672067
			37	P35S SKI 293T clone 5_66- CAGAluc/ren	Activin 5ng/ml 8h	233520	152240	1.53389	1.38456
			38	P35S SKI 293T clone 5_66- CAGAluc/ren	Activin 5ng/ml 8h	48600	32680	1.48715
			39	P35S SKI 293T clone 5_66- CAGAluc/ren	Activin 5ng/ml 8h	84800	72320	1.17257
			40	P35S SKI 293T clone 5_66- CAGAluc/ren	Activin 5ng/ml 8h	195400	145320	1.34462
			41	P35S SKI 293T clone 5_66- CAGAluc/ren	Activin 10ng/ml 8h	271040	171280	1.58244	1.52185
			42	P35S SKI 293T clone 5_66- CAGAluc/ren	Activin 10ng/ml 8h	255520	164760	1.55086
			43	P35S SKI 293T clone 5_66- CAGAluc/ren	Activin 10ng/ml 8h	274400	169760	1.6164
			44	P35S SKI 293T clone 5_66- CAGAluc/ren	Activin 10ng/ml 8h	256680	191880	1.33771
			45	P35S SKI 293T clone 5_66- CAGAluc/ren	Activin 20ng/ml 8h	303440	172560	1.75846	1.87263
			46	P35S SKI 293T clone 5_66- CAGAluc/ren	Activin 20ng/ml 8h	317280	162200	1.9561
			47	P35S SKI 293T clone 5_66- CAGAluc/ren	Activin 20ng/ml 8h	306120	192760	1.58809
			48	P35S SKI 293T clone 5_66- CAGAluc/ren	Activin 20ng/ml 8h	400120	182880	2.18788
			49	P35S SKI 293T clone 5_87 CAGAluc/ren	SB	3240	84360	0.0384068	0.0355957
			50	P35S SKI 293T clone 5_87 CAGAluc/ren	SB	3560	87400	0.0407323
			51	P35S SKI 293T clone 5_87 CAGAluc/ren	SB	1680	55720	0.0301508
			52	P35S SKI 293T clone 5_87 CAGAluc/ren	SB	3120	94280	0.0330929
			57	P35S SKI 293T clone 5_87 CAGAluc/ren	Activin 2.5ng/ml 8h	106880	245040	0.436174	0.453151
			58	P35S SKI 293T clone 5_87 CAGAluc/ren	Activin 2.5ng/ml 8h	118720	281320	0.422011
			59	P35S SKI 293T clone 5_87 CAGAluc/ren	Activin 2.5ng/ml 8h	119680	267240	0.447837
			60	P35S SKI 293T clone 5_87 CAGAluc/ren	Activin 2.5ng/ml 8h	133920	264360	0.506582
			61	P35S SKI 293T clone 5_87 CAGAluc/ren	Activin 5ng/ml 8h	75560	172800	0.437269	0.488147
			62	P35S SKI 293T clone 5_87 CAGAluc/ren	Activin 5ng/ml 8h	169520	173320	0.978075
			63	P35S SKI 293T clone 5_87 CAGAluc/ren	Activin 5ng/ml 8h	50400	167360	0.301147
			64	P35S SKI 293T clone 5_87 CAGAluc/ren	Activin 5ng/ml 8h	50440	213640	0.236098
			65	P35S SKI 293T clone 5_87 CAGAluc/ren	Activin 10ng/ml 8h	191720	138960	1.37968	1.02553
			66	P35S SKI 293T clone 5_87 CAGAluc/ren	Activin 10ng/ml 8h	181440	174240	1.04132
			67	P35S SKI 293T clone 5_87 CAGAluc/ren	Activin 10ng/ml 8h	164840	215560	0.764706
			68	P35S SKI 293T clone 5_87 CAGAluc/ren	Activin 10ng/ml 8h	167560	182840	0.91643
			69	P35S SKI 293T clone 5_87 CAGAluc/ren	Activin 20ng/ml 8h	216840	210600	1.02963	0.98564
			70	P35S SKI 293T clone 5_87 CAGAluc/ren	Activin 20ng/ml 8h	221080	214800	1.02924
			71	P35S SKI 293T clone 5_87 CAGAluc/ren	Activin 20ng/ml 8h	211880	214200	0.989169
			72	P35S SKI 293T clone 5_87 CAGAluc/ren	Activin 20ng/ml 8h	248320	277600	0.894524

## Sheet: Experiment 6
LUC_37		15.07.2019	20000 stable cells expressing GACA luc into 96 well plates
		16.07.2019	serum starved 0.5% FBS add SB o/N or OPTMEM
		17.07.2019	treate activin
			LUC_37
				Cell lines	Treatment	LUC	REN	LUC/Ren	Average LUC/Ren
			1	parental 293T CAGA luc/ renilla	SB	16640	109920	0.151383	0.145765
			2	parental 293T CAGA luc/ renilla	SB	16840	111000	0.151712
			3	parental 293T CAGA luc/ renilla	SB	10280	87120	0.117998
			4	parental 293T CAGA luc/ renilla	SB	17240	106440	0.161969
			9	parental 293T CAGA luc/ renilla	Activin 2.5ng/ml 8h	233440	150920	1.54678	1.40282
			10	parental 293T CAGA luc/ renilla	Activin 2.5ng/ml 8h	229920	141560	1.62419
			11	parental 293T CAGA luc/ renilla	Activin 2.5ng/ml 8h	210320	175400	1.19909
			12	parental 293T CAGA luc/ renilla	Activin 2.5ng/ml 8h	253160	203960	1.24122
			13	parental 293T CAGA luc/ renilla	Activin 5ng/ml 8h	425080	125680	3.38224	3.00395
			14	parental 293T CAGA luc/ renilla	Activin 5ng/ml 8h	363880	107840	3.37426
			15	parental 293T CAGA luc/ renilla	Activin 5ng/ml 8h	161160	57720	2.7921
			16	parental 293T CAGA luc/ renilla	Activin 5ng/ml 8h	313040	126880	2.46721
			17	parental 293T CAGA luc/ renilla	Activin 10ng/ml 8h	597600	155680	3.83864	3.64383
			18	parental 293T CAGA luc/ renilla	Activin 10ng/ml 8h	622680	155840	3.99564
			19	parental 293T CAGA luc/ renilla	Activin 10ng/ml 8h	554920	163360	3.39691
			20	parental 293T CAGA luc/ renilla	Activin 10ng/ml 8h	635120	189920	3.34414
			21	parental 293T CAGA luc/ renilla	Activin 20ng/ml 8h	608520	144280	4.21763	4.19341
			22	parental 293T CAGA luc/ renilla	Activin 20ng/ml 8h	671920	161880	4.15073
			23	parental 293T CAGA luc/ renilla	Activin 20ng/ml 8h	667800	164160	4.06798
			24	parental 293T CAGA luc/ renilla	Activin 20ng/ml 8h	813160	187480	4.33732
			25	P35S SKI 293T clone 5_66- CAGAluc/ren	SB	15080	127040	0.118703	0.096013
			26	P35S SKI 293T clone 5_66- CAGAluc/ren	SB	12000	115040	0.104312
			27	P35S SKI 293T clone 5_66- CAGAluc/ren	SB	9920	106520	0.0931281
			28	P35S SKI 293T clone 5_66- CAGAluc/ren	SB	8160	120160	0.0679095
			33	P35S SKI 293T clone 5_66- CAGAluc/ren	Activin 2.5ng/ml 8h	108000	163400	0.660955	0.631536
			34	P35S SKI 293T clone 5_66- CAGAluc/ren	Activin 2.5ng/ml 8h	112760	164960	0.68356
			35	P35S SKI 293T clone 5_66- CAGAluc/ren	Activin 2.5ng/ml 8h	109360	183080	0.597334
			36	P35S SKI 293T clone 5_66- CAGAluc/ren	Activin 2.5ng/ml 8h	111600	191000	0.584293
			37	P35S SKI 293T clone 5_66- CAGAluc/ren	Activin 5ng/ml 8h	17960	22520	0.797513	0.773507
			38	P35S SKI 293T clone 5_66- CAGAluc/ren	Activin 5ng/ml 8h	18840	23720	0.794266
			39	P35S SKI 293T clone 5_66- CAGAluc/ren	Activin 5ng/ml 8h	13000	13560	0.958702
			40	P35S SKI 293T clone 5_66- CAGAluc/ren	Activin 5ng/ml 8h	27960	51440	0.543546
			41	P35S SKI 293T clone 5_66- CAGAluc/ren	Activin 10ng/ml 8h	319360	164760	1.93833	1.7632
			42	P35S SKI 293T clone 5_66- CAGAluc/ren	Activin 10ng/ml 8h	295040	183240	1.61013
			43	P35S SKI 293T clone 5_66- CAGAluc/ren	Activin 10ng/ml 8h	286520	172400	1.66195
			44	P35S SKI 293T clone 5_66- CAGAluc/ren	Activin 10ng/ml 8h	312320	169520	1.84238
			45	P35S SKI 293T clone 5_66- CAGAluc/ren	Activin 20ng/ml 8h	327120	159640	2.04911	1.99489
			46	P35S SKI 293T clone 5_66- CAGAluc/ren	Activin 20ng/ml 8h	334000	175240	1.90596
			47	P35S SKI 293T clone 5_66- CAGAluc/ren	Activin 20ng/ml 8h	318040	160360	1.98329
			48	P35S SKI 293T clone 5_66- CAGAluc/ren	Activin 20ng/ml 8h	354760	173800	2.0412
			49	P35S SKI 293T clone 5_87 CAGAluc/ren	SB	3560	138840	0.025641	0.041654
			50	P35S SKI 293T clone 5_87 CAGAluc/ren	SB	5760	120200	0.0479201
			51	P35S SKI 293T clone 5_87 CAGAluc/ren	SB	6520	128760	0.0506368
			52	P35S SKI 293T clone 5_87 CAGAluc/ren	SB	6680	157480	0.0424181
			57	P35S SKI 293T clone 5_87 CAGAluc/ren	Activin 2.5ng/ml 8h	130400	244840	0.532593	0.493714
			58	P35S SKI 293T clone 5_87 CAGAluc/ren	Activin 2.5ng/ml 8h	129520	273000	0.474432
			59	P35S SKI 293T clone 5_87 CAGAluc/ren	Activin 2.5ng/ml 8h	116960	211360	0.553369
			60	P35S SKI 293T clone 5_87 CAGAluc/ren	Activin 2.5ng/ml 8h	139640	336920	0.41446
			61	P35S SKI 293T clone 5_87 CAGAluc/ren	Activin 5ng/ml 8h	196240	233000	0.842232	0.826782
			62	P35S SKI 293T clone 5_87 CAGAluc/ren	Activin 5ng/ml 8h	155560	229120	0.678946
			63	P35S SKI 293T clone 5_87 CAGAluc/ren	Activin 5ng/ml 8h	166280	192160	0.865321
			64	P35S SKI 293T clone 5_87 CAGAluc/ren	Activin 5ng/ml 8h	180480	196040	0.920628
			65	P35S SKI 293T clone 5_87 CAGAluc/ren	Activin 10ng/ml 8h	250560	231080	1.0843	1.08607
			66	P35S SKI 293T clone 5_87 CAGAluc/ren	Activin 10ng/ml 8h	232960	318160	0.73221
			67	P35S SKI 293T clone 5_87 CAGAluc/ren	Activin 10ng/ml 8h	250000	183760	1.36047
			68	P35S SKI 293T clone 5_87 CAGAluc/ren	Activin 10ng/ml 8h	240320	205880	1.16728
			69	P35S SKI 293T clone 5_87 CAGAluc/ren	Activin 20ng/ml 8h	270520	185120	1.46132	1.3503
			70	P35S SKI 293T clone 5_87 CAGAluc/ren	Activin 20ng/ml 8h	273080	182400	1.49715
			71	P35S SKI 293T clone 5_87 CAGAluc/ren	Activin 20ng/ml 8h	247200	227160	1.08822
			72	P35S SKI 293T clone 5_87 CAGAluc/ren	Activin 20ng/ml 8h	298640	220480	1.3545

## Sheet: Experiment 7
LUC_38		1207.2	20000 stable cells expressing GACA luc into 96 well plates
		13.07.2019	serum starved 0.5% FBS add SB o/N or OPTMEM
		14.07.2019	treate activin
				Cell lines	Treatment	LUC	REN	LUC/Ren	Average LUC/Ren
			1	parental 293T CAGA luc/ renilla	SB	10440	64200	0.162617	0.156527
			2	parental 293T CAGA luc/ renilla	SB	22760	123680	0.184023
			3	parental 293T CAGA luc/ renilla	SB	16880	115160	0.146579
			4	parental 293T CAGA luc/ renilla	SB	16760	126120	0.132889
			9	parental 293T CAGA luc/ renilla	Activin 2.5ng/ml 8h	235640	162160	1.45313	1.35018
			10	parental 293T CAGA luc/ renilla	Activin 2.5ng/ml 8h	222000	162600	1.36531
			11	parental 293T CAGA luc/ renilla	Activin 2.5ng/ml 8h	203240	205560	0.988714
			12	parental 293T CAGA luc/ renilla	Activin 2.5ng/ml 8h	269440	169080	1.59357
			13	parental 293T CAGA luc/ renilla	Activin 5ng/ml 8h	300920	103680	2.90239	2.87937
			14	parental 293T CAGA luc/ renilla	Activin 5ng/ml 8h	303480	112200	2.70481
			15	parental 293T CAGA luc/ renilla	Activin 5ng/ml 8h	403920	136120	2.96738
			16	parental 293T CAGA luc/ renilla	Activin 5ng/ml 8h	387640	131720	2.94291
			17	parental 293T CAGA luc/ renilla	Activin 10ng/ml 8h	452880	171360	2.64286	2.71298
			18	parental 293T CAGA luc/ renilla	Activin 10ng/ml 8h	463720	159080	2.91501
			19	parental 293T CAGA luc/ renilla	Activin 10ng/ml 8h	472280	167160	2.82532
			20	parental 293T CAGA luc/ renilla	Activin 10ng/ml 8h	464320	188080	2.46874
			21	parental 293T CAGA luc/ renilla	Activin 20ng/ml 8h	655800	165320	3.96685	3.88098
			22	parental 293T CAGA luc/ renilla	Activin 20ng/ml 8h	700040	182120	3.84384
			23	parental 293T CAGA luc/ renilla	Activin 20ng/ml 8h	691520	181840	3.8029
			24	parental 293T CAGA luc/ renilla	Activin 20ng/ml 8h	816480	208800	3.91034
			25	P35S SKI 293T clone 5_66- CAGAluc/ren	SB	10720	136320	0.0786385	0.0998706
			26	P35S SKI 293T clone 5_66- CAGAluc/ren	SB	11880	132680	0.0895387
			27	P35S SKI 293T clone 5_66- CAGAluc/ren	SB	19520	154280	0.126523
			28	P35S SKI 293T clone 5_66- CAGAluc/ren	SB	17880	170640	0.104782
			33	P35S SKI 293T clone 5_66- CAGAluc/ren	Activin 2.5ng/ml 8h	124440	164320	0.757303	0.617885
			34	P35S SKI 293T clone 5_66- CAGAluc/ren	Activin 2.5ng/ml 8h	109120	216120	0.504905
			35	P35S SKI 293T clone 5_66- CAGAluc/ren	Activin 2.5ng/ml 8h	120360	189160	0.636287
			36	P35S SKI 293T clone 5_66- CAGAluc/ren	Activin 2.5ng/ml 8h	119560	208640	0.573044
			37	P35S SKI 293T clone 5_66- CAGAluc/ren	Activin 5ng/ml 8h	237880	205960	1.15498	1.29418
			38	P35S SKI 293T clone 5_66- CAGAluc/ren	Activin 5ng/ml 8h	187680	157040	1.19511
			39	P35S SKI 293T clone 5_66- CAGAluc/ren	Activin 5ng/ml 8h	207640	142880	1.45325
			40	P35S SKI 293T clone 5_66- CAGAluc/ren	Activin 5ng/ml 8h	205680	149760	1.3734
			41	P35S SKI 293T clone 5_66- CAGAluc/ren	Activin 10ng/ml 8h	271680	135920	1.99882	1.63405
			42	P35S SKI 293T clone 5_66- CAGAluc/ren	Activin 10ng/ml 8h	276160	175960	1.56945
			43	P35S SKI 293T clone 5_66- CAGAluc/ren	Activin 10ng/ml 8h	311720	192720	1.61748
			44	P35S SKI 293T clone 5_66- CAGAluc/ren	Activin 10ng/ml 8h	298720	221200	1.35045
			45	P35S SKI 293T clone 5_66- CAGAluc/ren	Activin 20ng/ml 8h	334640	209960	1.59383	1.89086
			46	P35S SKI 293T clone 5_66- CAGAluc/ren	Activin 20ng/ml 8h	320800	182440	1.75839
			47	P35S SKI 293T clone 5_66- CAGAluc/ren	Activin 20ng/ml 8h	375320	185960	2.01828
			48	P35S SKI 293T clone 5_66- CAGAluc/ren	Activin 20ng/ml 8h	350080	159640	2.19293
			49	P35S SKI 293T clone 5_87 CAGAluc/ren	SB	5880	151800	0.0387352	0.0333493
			50	P35S SKI 293T clone 5_87 CAGAluc/ren	SB	5320	144000	0.0369444
			51	P35S SKI 293T clone 5_87 CAGAluc/ren	SB	5280	179880	0.0293529
			52	P35S SKI 293T clone 5_87 CAGAluc/ren	SB	4080	143840	0.0283648
			57	P35S SKI 293T clone 5_87 CAGAluc/ren	Activin 2.5ng/ml 8h	109480	258120	0.424144	0.49541
			58	P35S SKI 293T clone 5_87 CAGAluc/ren	Activin 2.5ng/ml 8h	112960	168200	0.671581
			59	P35S SKI 293T clone 5_87 CAGAluc/ren	Activin 2.5ng/ml 8h	110320	232440	0.474617
			60	P35S SKI 293T clone 5_87 CAGAluc/ren	Activin 2.5ng/ml 8h	117960	286800	0.411297
			61	P35S SKI 293T clone 5_87 CAGAluc/ren	Activin 5ng/ml 8h	161200	190000	0.848421	0.955865
			62	P35S SKI 293T clone 5_87 CAGAluc/ren	Activin 5ng/ml 8h	139880	127960	1.09315
			63	P35S SKI 293T clone 5_87 CAGAluc/ren	Activin 5ng/ml 8h	141400	181840	0.777607
			64	P35S SKI 293T clone 5_87 CAGAluc/ren	Activin 5ng/ml 8h	141480	128120	1.10428
			65	P35S SKI 293T clone 5_87 CAGAluc/ren	Activin 10ng/ml 8h	206960	190680	1.08538	0.94098
			66	P35S SKI 293T clone 5_87 CAGAluc/ren	Activin 10ng/ml 8h	197240	263320	0.749051
			67	P35S SKI 293T clone 5_87 CAGAluc/ren	Activin 10ng/ml 8h	223760	274920	0.81391
			68	P35S SKI 293T clone 5_87 CAGAluc/ren	Activin 10ng/ml 8h	193040	173040	1.11558
			69	P35S SKI 293T clone 5_87 CAGAluc/ren	Activin 20ng/ml 8h	216040	165200	1.30775	1.29981
			70	P35S SKI 293T clone 5_87 CAGAluc/ren	Activin 20ng/ml 8h	208000	168440	1.23486
			71	P35S SKI 293T clone 5_87 CAGAluc/ren	Activin 20ng/ml 8h	214160	157840	1.35682
