# Supplementary material for: Mutations in SKI in Shprintzen–Goldberg syndrome lead to attenuated TGF-β responses through SKI stabilization
Source: eLife journal article supplement (doi:10.7554/elife.63545), 2021-01-08
Supplement: supp [file elife-63545-supp-v1.zip › elife_poa_e63545_Figure_6_source_data_2.xlsx]

## Sheet: Plotted data
	Lab nomenclature	Official nomenclature for publication
	HEK293T P35SSKI clone 5_66	293T P35S SKI clone 2
	HEK 293T P35SSKI clone 5_87	293T P35S SKI clone 3
BRE LUC/REN
Experiment 1
Treatment	parental	P35S SKI 293T clone 2	P35S SKI 293T clone 3
untreated	3.66579	4.74368	6.82751
BMP4 5ng/ml	12.8764	13.7204	17.1786
BMP4 10ng/ml	10.3589	13.5831	13.7275
BMP4 20ng/ml	12.269	15.2622	12.9052
Experiment 2
Treatment	parental	P35S SKI 293T clone 2	P35S SKI 293T clone 3
untreated	6.52635	9.07295	8.71038
BMP4 5ng/ml	29.3302	34.3086	14.5814
BMP4 10ng/ml	30.1873	35.4084	27.3314
BMP4 20ng/ml	31.5257	30.3266	37.0167
Experiment 3
Treatment	parental	P35S SKI 293T clone 2	P35S SKI 293T clone 3
untreated	8.06517	10.4472	14.6202
BMP4 5ng/ml	26.0511	28.5558	23.7766
BMP4 10ng/ml	27.6659	27.3582	21.2422
BMP4 20ng/ml	28.2121	28.7885	24.1426
Experiment 4
Treatment	parental	P35S SKI 293T clone 2	P35S SKI 293T clone 3
untreated	11.4617	9.70856	16.1499
BMP4 20ng/ml	24.908	23.933	22.283
BMP4 10ng/ml	33.0808	28.0592	31.8036
BMP4 5ng/ml	27.9963	30.7552	31.4896
	AVERAGE	AVERAGE	AVERAGE
Treatment	parental	P35S SKI 293T clone 2	P35S SKI 293T clone 3
untreated	7.42977	8.49309	11.577
BMP4 20ng/ml	23.2914	25.1294	19.4549
BMP4 10ng/ml	25.3233	26.1022	23.5262
BMP4 5ng/ml	25.0008	26.2831	26.3885
STDEV	parental	P35S SKI 293T clone 2	P35S SKI 293T clone 3
untreated	3.24778	2.56191	4.50732
BMP4 20ng/ml	7.19186	8.71001	4.30536
BMP4 10ng/ml	10.2186	9.10567	7.83635
BMP4 5ng/ml	8.64018	7.39566	10.4215

## Sheet: Experiment 1
		plate 20000 cell
		starve in 0.5% FBS
		treat BMP4
				cell lines	Treatment	LUC	REN	LUC/REN	Average LUC/REN
			1	parental 293T BRE luc/ renilla	unt	408360	100720	4.05441	3.66579
			2	parental 293T BRE luc/ renilla	unt	350400	85760	4.08582
			3	parental 293T BRE luc/ renilla	unt	379760	120200	3.1594
			4	parental 293T BRE luc/ renilla	unt	378600	112560	3.36354
			5	parental 293T BRE luc/ renilla	BMP4 20ng/ml	2319640	185240	12.5223	12.269
			6	parental 293T BRE luc/ renilla	BMP4 20ng/ml	1876960	155840	12.0441
			7	parental 293T BRE luc/ renilla	BMP4 20ng/ml	1992520	159360	12.5033
			8	parental 293T BRE luc/ renilla	BMP4 20ng/ml	1980080	164920	12.0063
			9	parental 293T BRE luc/ renilla	BMP4 10ng/ml	1523960	159120	9.57743	10.3589
			10	parental 293T BRE luc/ renilla	BMP4 10ng/ml	1719520	180400	9.53171
			11	parental 293T BRE luc/ renilla	BMP4 10ng/ml	1944280	172960	11.2412
			12	parental 293T BRE luc/ renilla	BMP4 10ng/ml	1672560	150880	11.0854
			13	parental 293T BRE luc/ renilla	BMP4 5ng/ml	1653480	102040	16.2042	12.8764
			14	parental 293T BRE luc/ renilla	BMP4 5ng/ml	1476160	161640	9.13239
			15	parental 293T BRE luc/ renilla	BMP4 5ng/ml	1395320	110680	12.6068
			16	parental 293T BRE luc/ renilla	BMP4 5ng/ml	1668160	123000	13.5623
			25	P35S SKI 293T clone 5_66- BRE luc/ren	unt	485400	103840	4.6745	4.74368
			26	P35S SKI 293T clone 5_66- BRE luc/ren	unt	469040	100840	4.65133
			27	P35S SKI 293T clone 5_66- BRE luc/ren	unt	391320	79400	4.92846
			28	P35S SKI 293T clone 5_66- BRE luc/ren	unt	491680	104160	4.72043
			29	P35S SKI 293T clone 5_66- BRE luc/ren	BMP4 20ng/ml	1844160	134800	13.6807	15.2622
			30	P35S SKI 293T clone 5_66- BRE luc/ren	BMP4 20ng/ml	1640040	109640	14.9584
			31	P35S SKI 293T clone 5_66- BRE luc/ren	BMP4 20ng/ml	1648560	91000	18.116
			32	P35S SKI 293T clone 5_66- BRE luc/ren	BMP4 20ng/ml	1634040	114320	14.2936
			33	P35S SKI 293T clone 5_66- BRE luc/ren	BMP4 10ng/ml	1734880	156920	11.0558	13.5831
			34	P35S SKI 293T clone 5_66- BRE luc/ren	BMP4 10ng/ml	1895160	123920	15.2934
			35	P35S SKI 293T clone 5_66- BRE luc/ren	BMP4 10ng/ml	1967120	144520	13.6114
			36	P35S SKI 293T clone 5_66- BRE luc/ren	BMP4 10ng/ml	2250640	156600	14.3719
			37	P35S SKI 293T clone 5_66- BRE luc/ren	BMP4 5ng/ml	1732000	122800	14.1042	13.7204
			38	P35S SKI 293T clone 5_66- BRE luc/ren	BMP4 5ng/ml	1734680	130360	13.3068
			39	P35S SKI 293T clone 5_66- BRE luc/ren	BMP4 5ng/ml	1772400	129000	13.7395
			40	P35S SKI 293T clone 5_66- BRE luc/ren	BMP4 5ng/ml	1840520	134040	13.7311
			49	P35S SKI 293T clone 5_87 BRE luc/ren	unt	341840	61720	5.53856	6.82751
			50	P35S SKI 293T clone 5_87 BRE luc/ren	unt	152800	17560	8.70159
			51	P35S SKI 293T clone 5_87 BRE luc/ren	unt	139080	22280	6.24237
			52	P35S SKI 293T clone 5_87 BRE luc/ren	unt	176720	16000
			53	P35S SKI 293T clone 5_87 BRE luc/ren	BMP4 20ng/ml	472760	42320	11.1711	12.9052
			54	P35S SKI 293T clone 5_87 BRE luc/ren	BMP4 20ng/ml	428360	28120	15.2333
			55	P35S SKI 293T clone 5_87 BRE luc/ren	BMP4 20ng/ml	460800	33920	13.5849
			56	P35S SKI 293T clone 5_87 BRE luc/ren	BMP4 20ng/ml	461080	39640	11.6317
			57	P35S SKI 293T clone 5_87 BRE luc/ren	BMP4 10ng/ml	434600	29520	14.7222	13.7275
			58	P35S SKI 293T clone 5_87 BRE luc/ren	BMP4 10ng/ml	437360	31200	14.0179
			59	P35S SKI 293T clone 5_87 BRE luc/ren	BMP4 10ng/ml	601760	44480	13.5288
			60	P35S SKI 293T clone 5_87 BRE luc/ren	BMP4 10ng/ml	397440	31440	12.6412
			61	P35S SKI 293T clone 5_87 BRE luc/ren	BMP4 5ng/ml	534480	37360	14.3062	17.1786
			62	P35S SKI 293T clone 5_87 BRE luc/ren	BMP4 5ng/ml	344240	17280	19.9213
			63	P35S SKI 293T clone 5_87 BRE luc/ren	BMP4 5ng/ml	482000	37080	12.9989
			64	P35S SKI 293T clone 5_87 BRE luc/ren	BMP4 5ng/ml	716840	33360	21.488

## Sheet: Experiment 2
		plate 20000 cell
		starve in 0.5% FBS
		treat BMP4
				cell lines	Treatment	LUC	REN	LUC/REN	Average LUC/REN
			1	parental 293T BRE luc/ renilla	unt	687240	95160	7.22194	6.52635
			2	parental 293T BRE luc/ renilla	unt	621560	90600	6.86049
			3	parental 293T BRE luc/ renilla	unt	386480	64840	5.96052
			4	parental 293T BRE luc/ renilla	unt	481360	79400	6.06247
			5	parental 293T BRE luc/ renilla	BMP4 20ng/ml	4632880	175520	26.3952	31.5257
			6	parental 293T BRE luc/ renilla	BMP4 20ng/ml	3540760	117760	30.0676
			7	parental 293T BRE luc/ renilla	BMP4 20ng/ml	4671400	135800	34.3991
			8	parental 293T BRE luc/ renilla	BMP4 20ng/ml	3745400	106280	35.2409
			9	parental 293T BRE luc/ renilla	BMP4 10ng/ml	3803160	101640	37.4179	30.1873
			10	parental 293T BRE luc/ renilla	BMP4 10ng/ml	3799680	120400	31.5588
			11	parental 293T BRE luc/ renilla	BMP4 10ng/ml	4313720	172720	24.9752
			12	parental 293T BRE luc/ renilla	BMP4 10ng/ml	4132160	154200	26.7974
			13	parental 293T BRE luc/ renilla	BMP4 5ng/ml	2888400	98680	29.2704	29.3302
			14	parental 293T BRE luc/ renilla	BMP4 5ng/ml	2475440	93640	26.4357
			15	parental 293T BRE luc/ renilla	BMP4 5ng/ml	2800800	83000	33.7446
			16	parental 293T BRE luc/ renilla	BMP4 5ng/ml	3695600	132600	27.8703
			25	P35S SKI 293T clone 5_66- BRE luc/ren	unt	565880	62840	9.00509	9.07295
			26	P35S SKI 293T clone 5_66- BRE luc/ren	unt	578560	58520	9.88653
			27	P35S SKI 293T clone 5_66- BRE luc/ren	unt	672240	72880	9.22393
			28	P35S SKI 293T clone 5_66- BRE luc/ren	unt	682880	83520	8.17625
			29	P35S SKI 293T clone 5_66- BRE luc/ren	BMP4 20ng/ml	4448280	101680	43.7478	30.3266
			30	P35S SKI 293T clone 5_66- BRE luc/ren	BMP4 20ng/ml	4429720	121600	36.4286
			31	P35S SKI 293T clone 5_66- BRE luc/ren	BMP4 20ng/ml	4677320	146240	31.9839
			32	P35S SKI 293T clone 5_66- BRE luc/ren	BMP4 20ng/ml	824240	90120	9.14603
			33	P35S SKI 293T clone 5_66- BRE luc/ren	BMP4 10ng/ml	3860440	95240	40.5338	35.4084
			34	P35S SKI 293T clone 5_66- BRE luc/ren	BMP4 10ng/ml	3933640	102680	38.3097
			35	P35S SKI 293T clone 5_66- BRE luc/ren	BMP4 10ng/ml	3995920	114360	34.9416
			36	P35S SKI 293T clone 5_66- BRE luc/ren	BMP4 10ng/ml	4359960	156560	27.8485
			37	P35S SKI 293T clone 5_66- BRE luc/ren	BMP4 5ng/ml	2352160	84000	28.0019	34.3086
			38	P35S SKI 293T clone 5_66- BRE luc/ren	BMP4 5ng/ml	3202280	91680	34.9289
			39	P35S SKI 293T clone 5_66- BRE luc/ren	BMP4 5ng/ml	2845160	67360	42.2381
			40	P35S SKI 293T clone 5_66- BRE luc/ren	BMP4 5ng/ml	3375840	105280	32.0653
			49	P35S SKI 293T clone 5_87 BRE luc/ren	unt	264400	30080	8.78989	8.71038
			50	P35S SKI 293T clone 5_87 BRE luc/ren	unt	339440	53440	6.3518
			51	P35S SKI 293T clone 5_87 BRE luc/ren	unt	362040	31400	11.5299
			52	P35S SKI 293T clone 5_87 BRE luc/ren	unt	438560	53680	8.1699
			53	P35S SKI 293T clone 5_87 BRE luc/ren	BMP4 20ng/ml	2498200	75720	32.9926	37.0167
			54	P35S SKI 293T clone 5_87 BRE luc/ren	BMP4 20ng/ml	2392320	70440	33.9625
			55	P35S SKI 293T clone 5_87 BRE luc/ren	BMP4 20ng/ml	2276640	69840	32.5979
			56	P35S SKI 293T clone 5_87 BRE luc/ren	BMP4 20ng/ml	2542120	52400	48.5137
			57	P35S SKI 293T clone 5_87 BRE luc/ren	BMP4 10ng/ml	2322760	64440	36.0453	27.3314
			58	P35S SKI 293T clone 5_87 BRE luc/ren	BMP4 10ng/ml	2016640	78880	25.5659
			59	P35S SKI 293T clone 5_87 BRE luc/ren	BMP4 10ng/ml	2276880	81560	27.9166
			60	P35S SKI 293T clone 5_87 BRE luc/ren	BMP4 10ng/ml	2431160	122800	19.7977
			61	P35S SKI 293T clone 5_87 BRE luc/ren	BMP4 5ng/ml	1469760	122800	11.9687	14.5814
			62	P35S SKI 293T clone 5_87 BRE luc/ren	BMP4 5ng/ml	1860200	122800	15.1482
			63	P35S SKI 293T clone 5_87 BRE luc/ren	BMP4 5ng/ml	1874840	122800	15.2674
			64	P35S SKI 293T clone 5_87 BRE luc/ren	BMP4 5ng/ml	1957560	122800	15.941

## Sheet: Experiment 3
LUC_41	23.09.2019	plate 20000 cell
	24.09.2019	starve in 0.5% FBS
	25.09.2019	treat BMP4
			cell lines	Treatment	LUC	REN	LUC/REN	Average LUC/REN
		1	parental 293T BRE luc/ renilla	unt	210080	17680	11.8824	8.06517
		2	parental 293T BRE luc/ renilla	unt	183200	32400	5.65432
		3	parental 293T BRE luc/ renilla	unt	182120	26320	6.91945
		4	parental 293T BRE luc/ renilla	unt	191680	24560	7.80456
		5	parental 293T BRE luc/ renilla	BMP4 20ng/ml	634520	25280	25.0997	28.2121
		6	parental 293T BRE luc/ renilla	BMP4 20ng/ml	633280	23160	27.3437
		7	parental 293T BRE luc/ renilla	BMP4 20ng/ml	828640	23440	35.3515
		8	parental 293T BRE luc/ renilla	BMP4 20ng/ml	638360	25480	25.0534
		9	parental 293T BRE luc/ renilla	BMP4 10ng/ml	591520	14400	41.0778	27.6659
		10	parental 293T BRE luc/ renilla	BMP4 10ng/ml	719600	31200	23.0641
		11	parental 293T BRE luc/ renilla	BMP4 10ng/ml	617880	27560	22.4194
		12	parental 293T BRE luc/ renilla	BMP4 10ng/ml	743320	30840	24.1025
		13	parental 293T BRE luc/ renilla	BMP4 5ng/ml	446240	23160	19.2677	26.0511
		14	parental 293T BRE luc/ renilla	BMP4 5ng/ml	554000	13000	42.6154
		15	parental 293T BRE luc/ renilla	BMP4 5ng/ml	594720	27240	21.8326
		16	parental 293T BRE luc/ renilla	BMP4 5ng/ml	504840	24640	20.4886
		25	P35S SKI 293T clone 5_66- BRE luc/ren	unt	262200	36840	7.11726	10.4472
		26	P35S SKI 293T clone 5_66- BRE luc/ren	unt	260120	26760	9.72048
		27	P35S SKI 293T clone 5_66- BRE luc/ren	unt	297320	36160	8.22235
		28	P35S SKI 293T clone 5_66- BRE luc/ren	unt	327880	19600	16.7286
		29	P35S SKI 293T clone 5_66- BRE luc/ren	BMP4 20ng/ml	984240	35840	27.4621	28.7885
		30	P35S SKI 293T clone 5_66- BRE luc/ren	BMP4 20ng/ml	1052760	41440	25.4044
		31	P35S SKI 293T clone 5_66- BRE luc/ren	BMP4 20ng/ml	880280	26760	32.8954
		32	P35S SKI 293T clone 5_66- BRE luc/ren	BMP4 20ng/ml	1249760	42520	29.3923
		33	P35S SKI 293T clone 5_66- BRE luc/ren	BMP4 10ng/ml	1002400	35200	28.4773	27.3582
		34	P35S SKI 293T clone 5_66- BRE luc/ren	BMP4 10ng/ml	983000	38840	25.309
		35	P35S SKI 293T clone 5_66- BRE luc/ren	BMP4 10ng/ml	1044440	32640	31.9988
		36	P35S SKI 293T clone 5_66- BRE luc/ren	BMP4 10ng/ml	1066040	45080	23.6477
		37	P35S SKI 293T clone 5_66- BRE luc/ren	BMP4 5ng/ml	727280	27720	26.2367	28.5558
		38	P35S SKI 293T clone 5_66- BRE luc/ren	BMP4 5ng/ml	760080	22000	34.5491
		39	P35S SKI 293T clone 5_66- BRE luc/ren	BMP4 5ng/ml	862560	35320	24.4213
		40	P35S SKI 293T clone 5_66- BRE luc/ren	BMP4 5ng/ml	724240	24960	29.016
		49	P35S SKI 293T clone 5_87 BRE luc/ren	unt	327480	24800	13.2048	14.6202
		50	P35S SKI 293T clone 5_87 BRE luc/ren	unt	148560	11480	12.9408
		51	P35S SKI 293T clone 5_87 BRE luc/ren	unt	150480	8240	18.2621
		52	P35S SKI 293T clone 5_87 BRE luc/ren	unt	385040	27360	14.0731
		53	P35S SKI 293T clone 5_87 BRE luc/ren	BMP4 20ng/ml	634000	56320	11.2571	24.1426
		54	P35S SKI 293T clone 5_87 BRE luc/ren	BMP4 20ng/ml	845760	27280	31.0029
		55	P35S SKI 293T clone 5_87 BRE luc/ren	BMP4 20ng/ml	975680	27840	35.046
		56	P35S SKI 293T clone 5_87 BRE luc/ren	BMP4 20ng/ml	970160	50360	19.2645
		57	P35S SKI 293T clone 5_87 BRE luc/ren	BMP4 10ng/ml	641520	54200	11.8362	21.2422
		58	P35S SKI 293T clone 5_87 BRE luc/ren	BMP4 10ng/ml	518440	18800	27.5766
		59	P35S SKI 293T clone 5_87 BRE luc/ren	BMP4 10ng/ml	575480	22680	25.3739
		60	P35S SKI 293T clone 5_87 BRE luc/ren	BMP4 10ng/ml	602240	29840	20.1823
		61	P35S SKI 293T clone 5_87 BRE luc/ren	BMP4 5ng/ml	820920	33160	24.7563	23.7766
		62	P35S SKI 293T clone 5_87 BRE luc/ren	BMP4 5ng/ml	673920	38560	17.4772
		63	P35S SKI 293T clone 5_87 BRE luc/ren	BMP4 5ng/ml	567200	23800	23.8319
		64	P35S SKI 293T clone 5_87 BRE luc/ren	BMP4 5ng/ml	424000	14600	29.0411

## Sheet: Experiment 4
LUC_42	25.09.2019	plate 20000 cell
	26.09.2019	starve in 0.5% FBS
	27.09.2019	treat BMP4
			cell lines	Treatment	LUC	REN	LUC/REN	Average LUC/REN
		1	parental 293T BRE luc/ renilla	unt	175680	11360	15.4648	11.4617
		2	parental 293T BRE luc/ renilla	unt	181720	22520	8.06927
		3	parental 293T BRE luc/ renilla	unt	221200	20920	10.5736
		4	parental 293T BRE luc/ renilla	unt	219760	18720	11.7393
		5	parental 293T BRE luc/ renilla	BMP4 20ng/ml	685920	28920	23.7178	27.9963
		6	parental 293T BRE luc/ renilla	BMP4 20ng/ml	641560	24040	26.6872
		7	parental 293T BRE luc/ renilla	BMP4 20ng/ml	824240	24120	34.1725
		8	parental 293T BRE luc/ renilla	BMP4 20ng/ml	701640	25600	27.4078
		9	parental 293T BRE luc/ renilla	BMP4 10ng/ml	745920	20560	36.2802	33.0808
		10	parental 293T BRE luc/ renilla	BMP4 10ng/ml	621760	17240	36.065
		11	parental 293T BRE luc/ renilla	BMP4 10ng/ml	734960	17960	40.922
		12	parental 293T BRE luc/ renilla	BMP4 10ng/ml	679160	35640	19.0561
		13	parental 293T BRE luc/ renilla	BMP4 5ng/ml	458080	21480	21.3259	24.908
		14	parental 293T BRE luc/ renilla	BMP4 5ng/ml	451320	13840	32.6098
		15	parental 293T BRE luc/ renilla	BMP4 5ng/ml	526200	29720	17.7052
		16	parental 293T BRE luc/ renilla	BMP4 5ng/ml	508320	18160	27.9912
		25	P35S SKI 293T clone 5_66- BRE luc/ren	unt	242280	25040	9.67572	9.70856
		26	P35S SKI 293T clone 5_66- BRE luc/ren	unt	265840	25480	10.4333
		27	P35S SKI 293T clone 5_66- BRE luc/ren	unt	320760	32880	9.75547
		28	P35S SKI 293T clone 5_66- BRE luc/ren	unt	391440	43640	8.96975
		29	P35S SKI 293T clone 5_66- BRE luc/ren	BMP4 20ng/ml	1135720	39600	28.6798	30.7552
		30	P35S SKI 293T clone 5_66- BRE luc/ren	BMP4 20ng/ml	855440	28920	29.5795
		31	P35S SKI 293T clone 5_66- BRE luc/ren	BMP4 20ng/ml	1370240	51920
		32	P35S SKI 293T clone 5_66- BRE luc/ren	BMP4 20ng/ml	1296320	38120	34.0063
		33	P35S SKI 293T clone 5_66- BRE luc/ren	BMP4 10ng/ml	1208800	43840	27.573	28.0592
		34	P35S SKI 293T clone 5_66- BRE luc/ren	BMP4 10ng/ml	1128040	38120	29.5918
		35	P35S SKI 293T clone 5_66- BRE luc/ren	BMP4 10ng/ml	995400	40000	24.885
		36	P35S SKI 293T clone 5_66- BRE luc/ren	BMP4 10ng/ml	1335480	44240	30.1872
		37	P35S SKI 293T clone 5_66- BRE luc/ren	BMP4 5ng/ml	898240	34160	26.2951	23.933
		38	P35S SKI 293T clone 5_66- BRE luc/ren	BMP4 5ng/ml	801400	29600	27.0743
		39	P35S SKI 293T clone 5_66- BRE luc/ren	BMP4 5ng/ml	807520	34200	23.6117
		40	P35S SKI 293T clone 5_66- BRE luc/ren	BMP4 5ng/ml	960800	51240	18.751
		49	P35S SKI 293T clone 5_87 BRE luc/ren	unt	386040	23440	16.4693	16.1499
		50	P35S SKI 293T clone 5_87 BRE luc/ren	unt	262360	18800	13.9553
		51	P35S SKI 293T clone 5_87 BRE luc/ren	unt	197160	11200	17.6036
		52	P35S SKI 293T clone 5_87 BRE luc/ren	unt	167040	10080	16.5714
		53	P35S SKI 293T clone 5_87 BRE luc/ren	BMP4 20ng/ml	428080	6920	61.8613	31.4896
		54	P35S SKI 293T clone 5_87 BRE luc/ren	BMP4 20ng/ml	605760	27240	22.2379
		55	P35S SKI 293T clone 5_87 BRE luc/ren	BMP4 20ng/ml	1125400	47920	23.485
		56	P35S SKI 293T clone 5_87 BRE luc/ren	BMP4 20ng/ml	937080	51000	18.3741
		57	P35S SKI 293T clone 5_87 BRE luc/ren	BMP4 10ng/ml	816600	33120	24.6558	31.8036
		58	P35S SKI 293T clone 5_87 BRE luc/ren	BMP4 10ng/ml	751200	19640	38.2485
		59	P35S SKI 293T clone 5_87 BRE luc/ren	BMP4 10ng/ml	538440	14840	36.283
		60	P35S SKI 293T clone 5_87 BRE luc/ren	BMP4 10ng/ml	455160	16240	28.0271
		61	P35S SKI 293T clone 5_87 BRE luc/ren	BMP4 5ng/ml	1053160	58000	18.1579	22.283
		62	P35S SKI 293T clone 5_87 BRE luc/ren	BMP4 5ng/ml	697640	28080	24.8447
		63	P35S SKI 293T clone 5_87 BRE luc/ren	BMP4 5ng/ml	585240	26880	21.7723
		64	P35S SKI 293T clone 5_87 BRE luc/ren	BMP4 5ng/ml	442320	18160	24.3568
