# Supplementary material for: Mutations in SKI in Shprintzen–Goldberg syndrome lead to attenuated TGF-β responses through SKI stabilization
Source: eLife journal article supplement (doi:10.7554/elife.63545), 2021-01-08
Supplement: supp [file elife-63545-supp-v1.zip › elife_poa_e63545_Figure_7_figure_supplement_1.pdf]

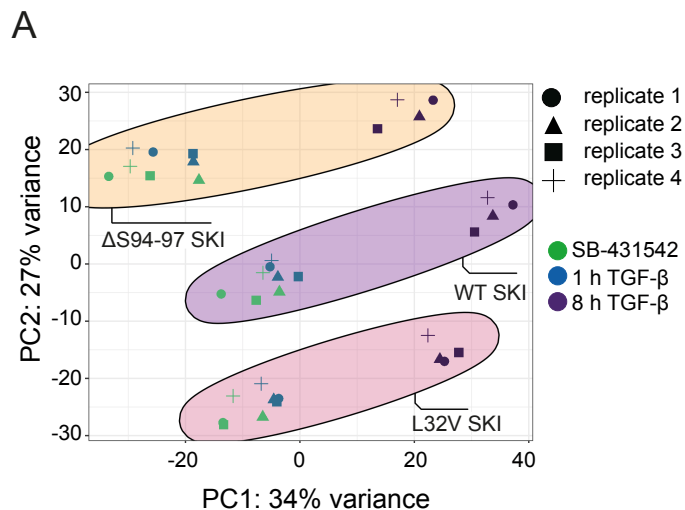

**B**

| ID            | DESCRIPTION                                       |
|---------------|---------------------------------------------------|
| R-HSA-170834  | Signaling by TGF- $\beta$ Receptor Complex        |
| R-HSA-9006936 | Signaling by TGF- $\beta$ family members          |
| R-HSA-400253  | Circadian Clock                                   |
| R-HSA-3700989 | Transcriptional Regulation by TP53                |
| R-HSA-2173788 | Downregulation of TGF- $\beta$ receptor signaling |

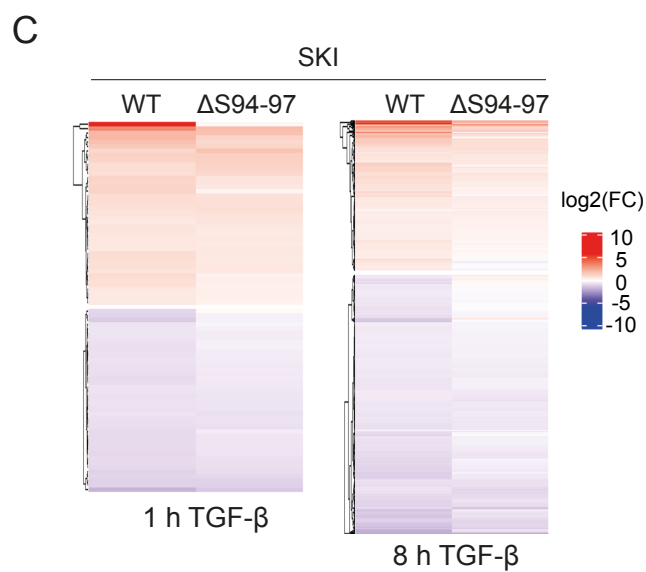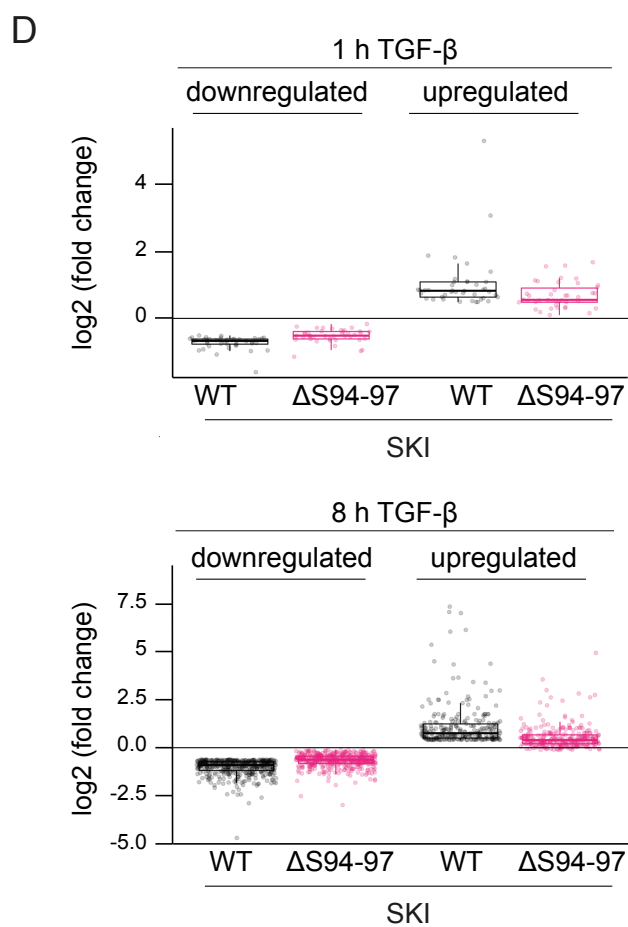

Figure 7 Supplement 1
