# Supplementary material for: Mutations in SKI in Shprintzen–Goldberg syndrome lead to attenuated TGF-β responses through SKI stabilization
Source: eLife journal article supplement (doi:10.7554/elife.63545), 2021-01-08
Supplement: supp [file elife-63545-supp-v1.zip › elife_poa_e63545_Figure_7_figure_supplement_2_source_data_1.xlsx]

## Sheet: ISLR2
			Lab nomenclature	Official nomenclature for publication
			NF14	Control fibroblasts containing WT SKI
			Fibro L32V	SGS fibroblasts containing L32V SKI
			Fibro ΔS94-97	SGS fibroblasts containing ΔS94-97
			Fold induction Normalised to control fibroblasts
	Cell lines	Treatment	Experiment 1	Experiment 2	Experiment 3	Experiment 4	Experiment 5	Experiment 6	Experiment 7	AVERAGE	STDEV	Cell lines	Treatment
	NF14	SB	1	1	1	1	1	1	1	1	0	NF14	SB				NF14	SB
	NF14	1h TGFB	19.0603	4.1945	2.51315	53.5569	13.4281	3.08816	4.63317	14.3535	6.8066	NF14	1h TGFB				NF14	1h TGFB
	NF14	8hTGFb	31.1034	55.1007	30.3368	34.2968	53.5293	19.2956	7.06896	32.9617	17.236	NF14	8hTGFb				NF14	8hTGFb
	Fibro L32V	SB	0.798022	0.940174	0.299889	1.42949	4.5735	3.51913	0.326351	1.69808	1.67717	Fibro L32V	SB				Fibro L32V	SB
	Fibro L32V	1h TGFB	2.31739	2.32463	5.86041	8.73011	16.0545	9.29884	1.90329	6.64132	5.1708	Fibro L32V	1h TGFB				Fibro L32V	1h TGFB
	Fibro L32V	8hTGFb	4.0404	11.0425	11.3648	27.5982	15.0289	1.38407	2.38584	10.4064	9.16974	Fibro L32V	8hTGFb				Fibro L32V	8hTGFb
	Fibro Δ S94-97	SB	1.4799	0.849096	0.27519	1.40444	3.66742	0.442859	0.294431	1.20191	1.19583	Fibro Δ S94-97	SB				Fibro Δ SER94-97	SB
	Fibro Δ S94-97	1h TGFB	23.0229	1.53954	4.35297	7.27528	32.1756	2.543	7.97507	11.2692	11.6953	Fibro Δ S94-97	1h TGFB				Fibro Δ SER94-97	1h TGFB
	Fibro Δ S94-97	8hTGFb	33.3589	22.0545	9.94175	11.6157	46.1419	0.681288	31.233	22.1467	15.836	Fibro Δ S94-97	8hTGFb				Fibro Δ SER94-97	8hTGFb
			delta delta CT for statistical analysis
	Cell lines	Treatment	Experiment 1	Experiment 2	Experiment 3	Experiment 4	Experiment 5	Experiment 6	Experiment 7	Cell lines	Treatment
	NF14	SB	0	0	0	0	0	0	0	NF14	SB
	NF14	1h TGFB	-4.2525	-2.0685	-1.3295	-5.743	-3.74718	-1.62675	-2.212	NF14	1h TGFB
	NF14	8hTGFb	-4.959	-5.784	-4.923	-5.1	-5.74226	-4.2702	-2.8215	NF14	8hTGFb
	Fibro L32V	SB	0.3255	0.0890007	1.7375	-0.515502	-2.1933	-1.81522	1.6155	Fibro L32V	SB
	Fibro L32V	1h TGFB	-1.2125	-1.217	-2.551	-3.126	-4.00491	-3.21705	-0.928499	Fibro L32V	1h TGFB
	Fibro L32V	8hTGFb	-2.0145	-3.465	-3.5065	-4.7865	-3.90967	-0.468921	-1.2545	Fibro L32V	8hTGFb
	Fibro Δ S94-97	SB	-0.5655	0.236	1.8615	-0.489999	-1.87476	1.17508	1.764	Fibro Δ S94-97	SB
	Fibro Δ S94-97	1h TGFB	-4.525	-0.622499	-2.122	-2.863	-5.00789	-1.34653	-2.9955	Fibro Δ S94-97	1h TGFB
	Fibro Δ S94-97	8hTGFb	-5.06	-4.463	-3.3135	-3.538	-5.52801	0.553662	-4.965	Fibro Δ S94-97	8hTGFb

## Sheet: CALB2
			In this paper
		NF14	Control fibroblasts which present WT SKI
		Fibro L32V	SGS fibroblasts which present L32V SKI
		Fibro Δ SER94-97	SGS fibroblasts which present Δ SER94-97
		Fold induction Normalised to control fibroblasts
Cell lines	Treatment	Experiment 1	Experiment 2	Experiment 3	Experiment 4	Experiment 5	Experiment 6	Experiment 7	AVERAGE	STDEV	Cell lines	Treatment
NF14	SB	1	1	1	1	1	1	1	1	0	NF14	SB
NF14	1h TGFB	9.52685	0.290982	1.50108	0.598739	2.69015	0.949833	1.0094	2.36672	3.45714	NF14	1h TGFB
NF14	8hTGFb	13.7609	52.0382	32.911	114.524	11.2961	49.1529	1.76602	39.3498	38.3058	NF14	8hTGFb
Fibro L32V	SB	0.524313	0.817336	0.543367	0.553441	3.17069	1.25808	1.71892	1.22659	0.966396	Fibro L32V	SB
Fibro L32V	1h TGFB	0.767107	2.08783	1.46307	1.06069	4.36025	1.29061	0.388773	1.63119	1.31759	Fibro L32V	1h TGFB
Fibro L32V	8hTGFb	6.79041	9.14194	5.01935	6.10081	6.72098	1.18914	1.03886	5.14307	3.01676	Fibro L32V	8hTGFb
Fibro Δ S94-97	SB	1.85125	1.66671	0.308106	0.582165	7.56985	0.641011	0.43422	1.86476	2.58842	Fibro Δ S94-97	SB
Fibro Δ S94-97	1h TGFB	3.05464	1.18838	0.773782	1.33007	3.08848	1.71836	0.58277	1.67664	1.02177	Fibro Δ S94-97	1h TGFB
Fibro Δ S94-97	8hTGFb	67.1819	46.1577	4.45832	18.9746	13.2602	0.846943	7.87074	22.6786	24.7053	Fibro Δ S94-97	8hTGFb
		delta delta CT for statistical analysis
Cell lines	Treatment	Experiment 1	Experiment 2	Experiment 3	Experiment 4	Experiment 5	Experiment 6	Experiment 7	Cell lines	Treatment
NF14	SB	0	0	0	0	0	0	0	NF14	SB
NF14	1h TGFB	-3.252	1.781	-0.585999	0.74	-1.42768	0.074254	-0.0135002	NF14	1h TGFB
NF14	8hTGFb	-3.7825	-5.7015	-5.0405	-6.8395	-3.49776	-5.6192	-0.820499	NF14	8hTGFb
Fibro L32V	SB	0.931499	0.290999	0.88	0.853499	-1.6648	-0.331219	-0.781499	Fibro L32V	SB
Fibro L32V	1h TGFB	0.3825	-1.062	-0.548999	-0.085	-2.12441	-0.368051	1.363	Fibro L32V	1h TGFB
Fibro L32V	8hTGFb	-2.7635	-3.1925	-2.3275	-2.609	-2.74867	-0.24992	-0.0549994	Fibro L32V	8hTGFb
Fibro Δ S94-97	SB	-0.888499	-0.737	1.6985	0.7805	-2.92026	0.641579	1.2035	Fibro Δ S94-97	SB
Fibro Δ S94-97	1h TGFB	-1.611	-0.249	0.370001	-0.4115	-1.62689	-0.781034	0.779	Fibro Δ S94-97	1h TGFB
Fibro Δ S94-97	8hTGFb	-6.07	-5.5285	-2.1565	-4.246	-3.72903	0.239663	-2.9765	Fibro Δ S94-97	8hTGFb

## Sheet: SOX11
			In this paper
		NF14	Control fibroblasts which present WT SKI
		Fibro L32V	SGS fibroblasts which present L32V SKI
		Fibro Δ SER94-97	SGS fibroblasts which present Δ SER94-97
		Fold induction Normalised to control fibroblasts
Cell lines	Treatment	Experiment 1	Experiment 2	Experiment 3	Experiment 4	Experiment 5	Experiment 6	Experiment 7	AVERAGE	STDEV	Cell lines	Treatment
NF14	SB	1	1	1	1	1	1	1	1	0	NF14	SB
NF14	1h TGFB	1.36509	0.578947	0.366783	0.116953	0.750897	1.18694	0.959266	0.760697	0.375669	NF14	1h TGFB
NF14	8hTGFb	0.89131	2.50013	0.707597	1.31631	2.44741	5.88362	1.49071	2.17673	1.77672	NF14	8hTGFb
Fibro L32V	SB	0.29689	0.0539027	0.00732732	0.0342798	0.248066	2.67719	0.0299251	0.478226	0.976486	Fibro L32V	SB
Fibro L32V	1h TGFB	0.494485	0.0350729	0.0848171	0.0146953	0.0273069	3.67705	0.011312	0.620678	1.3588	Fibro L32V	1h TGFB
Fibro L32V	8hTGFb	0.110721	0.0963549	0.0379304	0.054959	0.0580192	0.172291	0.015442	0.0779597	0.0528324	Fibro L32V	8hTGFb
Fibro Δ S94-97	SB	0.880869	1.11458	0.109424	0.0504501	1.20269	0.035144	1.16554	0.651243	0.558287	Fibro Δ S94-97	SB
Fibro Δ S94-97	1h TGFB	1.01501	0.343886	0.295453	0.208627	0.702415	0.0268401	0.802738	0.484996	0.358533	Fibro Δ S94-97	1h TGFB
Fibro Δ S94-97	8hTGFb	0.313166	0.189399	0.144136	0.0909048	0.563518	0.0604061	0.251739	0.230467	0.171149	Fibro Δ S94-97	8hTGFb
		delta delta CT for statistical analysis
Cell lines	Treatment	Experiment 1	Experiment 2	Experiment 3	Experiment 4	Experiment 5	Experiment 6	Experiment 7	Cell lines	Treatment
NF14	SB	0	0	0	0	0	0	0	NF14	SB
NF14	1h TGFB	-0.448998	0.788498	1.447	3.096	0.413314	-0.247247	0.0599976	NF14	1h TGFB
NF14	8hTGFb	0.166	-1.322	0.499001	-0.3965	-1.29126	-2.5567	-0.576	NF14	8hTGFb
Fibro L32V	SB	1.752	4.2135	7.0925	4.8665	2.0112	-1.42072	5.0625	Fibro L32V	SB
Fibro L32V	1h TGFB	1.016	4.8335	3.5595	6.0885	5.19459	-1.87855	6.466	Fibro L32V	1h TGFB
Fibro L32V	8hTGFb	3.175	3.3755	4.7205	4.1855	4.10733	2.53708	6.017	Fibro L32V	8hTGFb
Fibro Δ S94-97	SB	0.183001	-0.1565	3.192	4.309	-0.266265	4.83058	-0.221001	Fibro Δ S94-97	SB
Fibro Δ S94-97	1h TGFB	-0.0214987	1.54	1.759	2.261	0.509604	5.21947	0.316999	Fibro Δ S94-97	1h TGFB
Fibro Δ S94-97	8hTGFb	1.675	2.4005	2.7945	3.4595	0.827466	4.04916	1.99	Fibro Δ S94-97	8hTGFb

## Sheet: ITGB6
			In this paper
		NF14	Control fibroblasts which present WT SKI
		Fibro L32V	SGS fibroblasts which present L32V SKI
		Fibro Δ SER94-97	SGS fibroblasts which present Δ SER94-97
		Fold induction Normalised to control fibroblasts
Cell lines	Treatment	Experiment 1	Experiment 2	Experiment 3	Experiment 4	Experiment 5	Experiment 6	Experiment 7	AVERAGE	STDEV	Cell lines	Treatment
NF14	SB	1	1	1	1	1	1	1	1	0	NF14	SB
NF14	1h TGFB	4.05724	4.71253	1.71416	1.11034	0.848896	0.986401	0.753928	2.02621	1.75413	NF14	1h TGFB
NF14	8hTGFb	10.7183	47.8684	30.8671	88.4016	4.00366	10.0994	3.88253	27.9773	31.1659	NF14	8hTGFb
Fibro L32V	SB	0.194319	0.517992	0.422932	0.617067	0.6322	0.88253	0.125217	0.484608	0.263318	Fibro L32V	SB
Fibro L32V	1h TGFB	0.176961	0.991718	2.68049	0.952638	0.627338	3.20439	0.104894	1.24835	1.21597	Fibro L32V	1h TGFB
Fibro L32V	8hTGFb	2.34486	7.65022	5.56546	5.01587	0.977616	5.53245	1.61776	4.1006	2.47095	Fibro L32V	8hTGFb
Fibro Δ S94-97	SB	0.903126	1.37459	0.474342	0.835667	2.16355	0.46941	0.314362	0.933578	0.649052	Fibro Δ S94-97	SB
Fibro Δ S94-97	1h TGFB	1.33746	0.160373	1.07512	1.06881	0.806586	0.804426	0.145138	0.771131	0.459893	Fibro Δ S94-97	1h TGFB
Fibro Δ S94-97	8hTGFb	6.92109	18.5391	7.61319	32.5368	13.9779	0.325637	3.61877	11.9332	10.9543	Fibro Δ S94-97	8hTGFb
		delta delta CT for statistical analysis
Cell lines	Treatment	Experiment 1	Experiment 2	Experiment 3	Experiment 4	Experiment 5	Experiment 6	Experiment 7
NF14	SB	0	0	0	0	0	0	0
NF14	1h TGFB	-2.0205	-2.2365	-0.777499	-0.151001	0.236341	0.0197535	0.407501
NF14	8hTGFb	-3.422	-5.581	-4.948	-6.466	-2.00132	-3.3362	-1.957
Fibro L32V	SB	2.3635	0.948999	1.2415	0.6965	0.661548	0.180283	2.9975
Fibro L32V	1h TGFB	2.4985	0.0119982	-1.4225	0.0700006	0.672685	-1.68005	3.253
Fibro L32V	8hTGFb	-1.2295	-2.9355	-2.4765	-2.3265	0.0326595	-2.46792	-0.694
Fibro Δ S94-97	SB	0.147001	-0.459001	1.076	0.259	-1.1134	1.09108	1.6695
Fibro Δ S94-97	1h TGFB	-0.419499	2.6405	-0.1045	-0.0959997	0.3101	0.313968	2.7845
Fibro Δ S94-97	8hTGFb	-2.791	-4.2125	-2.9285	-5.024	-3.80507	1.61866	-1.8555

## Sheet: HEY1 
			In this paper
		NF14	Control fibroblasts which present WT SKI
		Fibro L32V	SGS fibroblasts which present L32V SKI
		Fibro Δ SER94-97	SGS fibroblasts which present Δ SER94-97
		Fold induction Normalised to control fibroblasts
Cell lines	Treatment	Experiment 1	Experiment 2	Experiment 3	Experiment 4	Experiment 5	Experiment 6	Experiment 7	AVERAGE	STDEV	Cell lines	Treatment
NF14	SB	1	1	1	1	1	1	1	1	0	NF14	SB
NF14	1h TGFB	3.60001	2.56241	1.18058	3.2698	4.79054	5.30277	3.48583	3.45599	1.49555	NF14	1h TGFB
NF14	8hTGFb	0.337509	1.27324	0.408384	0.308213	0.358429	0.934784	1.37984	0.714342	0.471004	NF14	8hTGFb
Fibro L32V	SB	0.644165	0.599987	0.475495	0.625682	0.146178	1.30425	0.098175	0.556276	0.399683	Fibro L32V	SB
Fibro L32V	1h TGFB	0.931418	1.0385	1.52045	0.575744	0.933946	3.9863	0.281557	1.32399	1.23564	Fibro L32V	1h TGFB
Fibro L32V	8hTGFb	0.314689	0.836827	0.318751	0.550572	0.228723	0.716193	0.0781018	0.434837	0.27441	Fibro L32V	8hTGFb
Fibro Δ S94-97	SB	0.694958	0.635736	0.156692	0.609628	0.641165	0.38781	0.205613	0.475943	0.224142	Fibro Δ S94-97	SB
Fibro Δ S94-97	1h TGFB	4.39695	0.47847	2.50272	0.736624	0.0994693	0.879975	1.30134	1.48508	1.49487	Fibro Δ S94-97	1h TGFB
Fibro Δ S94-97	8hTGFb	0.159873	0.293514	0.305766	0.474014	0.699082	0.391976	0.319968	0.377742	0.171177	Fibro Δ S94-97	8hTGFb
		delta delta CT for statistical analysis
Cell lines	Treatment	Experiment 1	Experiment 2	Experiment 3	Experiment 4	Experiment 5	Experiment 6	Experiment 7	Cell lines	Treatment
NF14	SB	0	0	0	0	0	0	0	NF14	SB
NF14	1h TGFB	-1.848	-1.3575	-0.239498	-1.7092	-2.26019	-2.40674	-1.8015	NF14	1h TGFB
NF14	8hTGFb	1.567	-0.348499	1.292	1.698	1.48024	0.0972958	-0.464499	NF14	8hTGFb
Fibro L32V	SB	0.634499	0.736998	1.0725	0.676499	2.7742	-0.383219	3.3485	Fibro L32V	SB
Fibro L32V	1h TGFB	0.102499	-0.0545015	-0.6045	0.7965	0.0985889	-1.99505	1.8285	Fibro L32V	1h TGFB
Fibro L32V	8hTGFb	1.668	0.256999	1.6495	0.860998	2.12833	0.48158	3.6785	Fibro L32V	8hTGFb
Fibro Δ S94-97	SB	0.525002	0.6535	2.674	0.714	0.641233	1.36658	2.282	Fibro Δ S94-97	SB
Fibro Δ S94-97	1h TGFB	-2.1365	1.0635	-1.3235	0.440999	3.3296	0.184466	-0.379999	Fibro Δ S94-97	1h TGFB
Fibro Δ S94-97	8hTGFb	2.645	1.7685	1.7095	1.077	0.516466	1.35116	1.644	Fibro Δ S94-97	8hTGFb

## Sheet: COL7A1 
			In this paper
		NF14	Control fibroblasts which present WT SKI
		Fibro L32V	SGS fibroblasts which present L32V SKI
		Fibro Δ S94-97	SGS fibroblasts which present Δ SER94-97
		Fold induction Normalised to control fibroblasts
Cell lines	Treatment	Experiment 1	Experiment 2	Experiment 3	Experiment 4	Experiment 5	Experiment 6	Experiment 7	AVERAGE	STDEV	Cell lines	Treatment
NF14	SB	1	1	1	1	1	1	1	1	0	NF14	SB
NF14	1h TGFB	3.79342	1.35332	0.0994421	0.082555	0.281009	3.06683	0.268408	1.27785	1.59357	NF14	1h TGFB
NF14	8hTGFb	15.0636	9.98318	5.17659	5.55197	5.90836	4.87095	7.90081	7.77936	3.68844	NF14	8hTGFb
Fibro L32V	SB	1.01995	0.886997	0.219151	0.449378	0.156724	1.45369	0.420594	0.658069	0.476151	Fibro L32V	SB
Fibro L32V	1h TGFB	1.05409	1.15189	1.52785	0.618781	0.666839	2.40669	0.0215376	1.06395	0.760316	Fibro L32V	1h TGFB
Fibro L32V	8hTGFb	4.55199	6.11775	4.74366	2.02932	0.712851	0.970917	0.350382	2.78241	2.31477	Fibro L32V	8hTGFb
Fibro Δ S94-97	SB	1.35802	0.807202	0.420594	0.617495	0.290934	0.271105	0.273858	0.577029	0.399245	Fibro Δ S94-97	SB
Fibro Δ S94-97	1h TGFB	3.18877	0.219532	1.03204	0.760489	1.34248	1.01293	0.226408	1.11181	1.00719	Fibro Δ S94-97	1h TGFB
Fibro Δ S94-97	8hTGFb	6.79512	5.85026	5.92371	4.43213	2.52019	0.691278	0.516557	3.81846	2.5873	Fibro Δ S94-97	8hTGFb
		delta delta CT for statistical analysis
Cell lines	Treatment
NF14	SB	0	0	0	0	0	0	0
NF14	1h TGFB	-1.9235	-0.4365	3.33	3.5985	1.83131	-1.61675	1.8975
NF14	8hTGFb	-3.913	-3.3195	-2.372	-2.473	-2.56276	-2.2842	-2.982
Fibro L32V	SB	-0.0284996	0.172999	2.19	1.154	2.6737	-0.53972	1.2495
Fibro L32V	1h TGFB	-0.0760002	-0.204	-0.611501	0.6925	0.58459	-1.26705	5.537
Fibro L32V	8hTGFb	-2.1865	-2.613	-2.246	-1.021	0.488328	0.0425797	1.513
Fibro Δ S94-97	SB	-0.4415	0.308999	1.2495	0.6955	1.78123	1.88308	1.8685
Fibro Δ S94-97	1h TGFB	-1.673	2.1875	-0.0455008	0.395	-0.424895	-0.0185337	2.143
Fibro Δ S94-97	8hTGFb	-2.7645	-2.5485	-2.5665	-2.148	-1.33353	0.532662	0.953
