# Supplementary material for: Mutations in SKI in Shprintzen–Goldberg syndrome lead to attenuated TGF-β responses through SKI stabilization
Source: eLife journal article supplement (doi:10.7554/elife.63545), 2021-01-08
Supplement: supp [file elife-63545-supp-v1.zip › elife_poa_e63545_Figure_7_source_data_1.xlsx]

## Sheet: L32V vs Ctrl 1 h TGF-β
Full list of genes differentially regulated by TGF-b in the Control Fibroblasts versus L32V fibroblasts after 1 hrs
Genes are significantly differentially expressed in the control cell line with an absolute log2 fold change of at least 0.5 and detected with at least 2 TPM in the control cell lines.
Genes highlighted in red are the not significant in L32V fibroblasts and they have been shown by the heatmaps and box plots in Figure 7. Genes in bold were validated by qPCR (Supplementary Figure 7)
		Control fibroblasts 1 hrs vs 0		L32V fibroblasts 1 hrs vs 0
Ensembl Gene ID	Symbol	Normalized log2Fold Change	padj.	Normalized log2Fold Change	padj	significant in L32V	Gene Name
ENSG00000125740	FOSB	8.44268	1.0149e-120	7.9659	2.38518e-99	significant	FosB proto-oncogene, AP-1 transcription factor subunit
ENSG00000170345	FOS	6.64367	4.48261e-69	5.11705	5.83317e-29	significant	early growth response 2
ENSG00000162772	ATF3	4.37933	5.56988e-59	3.45198	2.00184e-23	significant
ENSG00000137331	IER3	5.18917	8.75152e-56	4.35319	1.3647e-77	significant	Fos proto-oncogene, AP-1 transcription factor subunit
ENSG00000099860	GADD45B	3.31138	4.0113e-53	3.1565	2.3417e-62	significant
ENSG00000160888	IER2	2.38768	2.28685e-45	2.07153	1.20855e-52	significant	transmembrane protein 88
ENSG00000155090	KLF10	3.36985	5.17269e-36	3.33334	4.94146e-49	significant
	ZFP36	2.83314	2.36866e-34	2.26763	6.21442e-20	significant	long intergenic non-protein coding RNA 1629
ENSG00000171223	JUNB	4.32867	2.3123e-33	3.60906	3.23707e-23	significant	early growth response 3
ENSG00000161642	ZNF385A	1.76233	1.80034e-32	1.54206	6.11152e-15	significant
ENSG00000134107	BHLHE40	4.2741	9.67899e-28	4.15384	3.38171e-41	significant
ENSG00000118515	SGK1	2.05027	1.06879e-24	2.32729	1.40891e-14	significant	immediate early response 3
ENSG00000122877	EGR2	7.58332	2.37802e-24	5.91813	1.83267e-36	significant	activity regulated cytoskeleton associated protein
ENSG00000267519		2.46198	3.59182e-24	2.16054	1.80986e-15	significant	LIF interleukin 6 family cytokine
ENSG00000173334	TRIB1	3.87757	7.58967e-24	3.37588	1.83267e-36	significant	nuclear receptor subfamily 4 group A member 1
ENSG00000166592	RRAD	4.51015	1.62336e-23	3.03855	2.98986e-11	significant	hes family bHLH transcription factor 1
ENSG00000142871	CCN1	1.37469	3.14127e-22	1.31539	6.49579e-14	significant	RRAD, Ras related glycolysis inhibitor and calcium channel regulator
ENSG00000117479	SLC19A2	2.3938	4.67019e-22	2.58172	2.40194e-18	significant	activating transcription factor 3
ENSG00000101665	SMAD7	2.56513	1.43508e-20	2.3481	1.45176e-18	significant	JunB proto-oncogene, AP-1 transcription factor subunit
ENSG00000144655	CSRNP1	3.58255	1.93793e-19	3.382	8.98598e-23	significant	dual specificity phosphatase 2
ENSG00000118523	CCN2	2.25381	2.72112e-19	2.33027	3.26125e-12	significant	basic helix-loop-helix family member e40
ENSG00000143384	MCL1	1.39983	6.17749e-19	1.44744	3.63602e-19	significant	immunoglobulin superfamily containing leucine rich repeat 2
ENSG00000167874	TMEM88	6.41218	2.82974e-18	6.01775	8.75245e-17	significant	neuronal PAS domain protein 4
ENSG00000184557	SOCS3	2.41246	7.01044e-18	2.05121	2.35793e-08	significant	tribbles pseudokinase 1
ENSG00000120129	DUSP1	2.52432	7.40633e-18	2.77924	1.06424e-36	significant
ENSG00000162783	IER5	1.05247	2.83176e-17	0.986974	1.23846e-11	significant	salt inducible kinase 1
ENSG00000175505	CLCF1	2.83957	5.23796e-17	2.63716	3.43501e-19	significant
ENSG00000137193	PIM1	3.4729	3.78895e-16	2.44618	3.70391e-13	significant	cysteine and serine rich nuclear protein 1
ENSG00000163874	ZC3H12A	3.34196	6.28923e-15	3.25778	2.60198e-23	significant	lysine demethylase 6B
ENSG00000282458	WASH5P	-0.888075	1.37721e-14	-0.714273	1.85374e-06	significant	Pim-1 proto-oncogene, serine/threonine kinase
ENSG00000132510	KDM6B	3.54711	2.18915e-14	3.38362	9.63769e-14	significant	interleukin 11
ENSG00000158050	DUSP2	4.2785	2.82808e-14	4.10158	2.99726e-20	significant	salt inducible kinase 1B (putative)
ENSG00000272273	IER3-AS1	3.3319	3.61165e-14	2.3424	9.71295e-06	significant	Kruppel like factor 10
ENSG00000249669		3.24173	4.77065e-14	3.24489	4.45462e-20	significant	zinc finger CCCH-type containing 12A
ENSG00000070495	JMJD6	1.67853	7.26246e-14	1.76415	2.46992e-08	significant	IER3 antisense RNA 1
ENSG00000267598		2.55736	1.16301e-13	1.80238	6.20639e-11	significant	growth arrest and DNA damage inducible beta
ENSG00000179388	EGR3	5.42251	1.91171e-13	5.37121	3.62688e-50	significant	MIR503 host gene
ENSG00000162413	KLHL21	1.29731	2.347e-13	1.1242	5.44587e-08	significant
ENSG00000163545	NUAK2	2.31429	3.04054e-13	2.10812	1.16521e-09	significant	heparin binding EGF like growth factor
ENSG00000069399	BCL3	2.12783	4.13763e-12	1.73356	5.05586e-05	significant	early growth response 1
ENSG00000078401	EDN1	2.79191	5.23417e-12	2.55662	2.18668e-08	significant	regulator of G protein signaling 16
ENSG00000114315	HES1	4.61336	5.23417e-12	4.05536	3.08398e-14	significant	long intergenic non-protein coding RNA 1013
ENSG00000197019	SERTAD1	1.92781	5.30667e-12	1.59076	1.11445e-09	significant
ENSG00000132002	DNAJB1	0.769948	5.4585e-12	0.608109	0.0062499	significant	cholinergic receptor nicotinic alpha 9 subunit
ENSG00000113070	HBEGF	3.22787	7.73742e-12	4.27189	2.67395e-31	significant	SLFNL1 antisense RNA 1
ENSG00000131652	THOC6	0.979371	1.21799e-11	0.36698	0.270279	not_significant	distal-less homeobox 2
ENSG00000103449	SALL1	0.748786	1.88506e-11	0.618237	0.0876221	not_significant	cardiotrophin like cytokine factor 1
ENSG00000163660	CCNL1	0.854658	1.88506e-11	0.812793	1.02025e-07	significant	ZFP36 ring finger protein
ENSG00000151014	NOCT	2.05136	1.88803e-11	1.88971	5.96122e-12	significant	endothelin 1
ENSG00000174576	NPAS4	4.04003	1.94895e-11	3.05585	7.87153e-13	significant	claudin 4
ENSG00000173276	ZBTB21	1.38682	1.19233e-10	1.3527	2.0095e-08	significant
ENSG00000117525	F3	1.78307	1.2886e-10	2.56174	1.52367e-29	significant	angiopoietin like 4
ENSG00000253669		2.66165	1.30316e-10	1.87625	0.000184873	significant
ENSG00000281207	SLFNL1-AS1	2.93124	1.64165e-10	3.42182	5.01316e-12	significant
ENSG00000118263	KLF7	1.69334	1.86876e-10	1.34209	3.0363e-06	significant
ENSG00000128342	LIF	4.70085	3.43303e-10	7.02244	1.55052e-25	significant	SMAD family member 7
ENSG00000123358	NR4A1	4.7004	3.70338e-10	4.94231	1.29791e-09	significant
ENSG00000261490		1.65374	4.6569e-10	1.36468	1.07042e-06	significant	dual specificity phosphatase 1
ENSG00000136997	MYC	1.73022	6.54362e-10	1.95636	4.56726e-17	significant
ENSG00000163659	TIPARP	1.711	1.11159e-09	2.01435	2.83483e-11	significant	suppressor of cytokine signaling 3
ENSG00000158615	PPP1R15B	1.38873	1.39067e-09	1.61477	5.47145e-09	significant	solute carrier family 19 member 2
ENSG00000148339	SLC25A25	1.35107	1.42698e-09	1.34109	3.25307e-16	significant	immediate early response 2
ENSG00000165617	DACT1	2.18821	3.315e-09	1.68028	0.00158977	significant	SKI like proto-oncogene
ENSG00000134954	ETS1	0.96477	7.9683e-09	0.831247	1.09789e-11	significant	vascular endothelial growth factor A
ENSG00000230630		1.0642	2.49779e-08	1.06996	2.0288e-06	significant	nuclear receptor subfamily 4 group A member 3
ENSG00000115844	DLX2	2.926	2.89325e-08	3.00797	3.61856e-08	significant	NUAK family kinase 2
ENSG00000156030	ELMSAN1	1.70502	3.6205e-08	1.64546	1.19739e-07	significant
ENSG00000198142	SOWAHC	1.68868	3.70464e-08	1.51151	1.90595e-06	significant	cellular communication network factor 2
ENSG00000183696	UPP1	1.99743	4.09624e-08	1.49791	1.49656e-09	significant
ENSG00000143878	RHOB	2.01433	4.3295e-08	2.20021	5.28536e-10	significant	dishevelled binding antagonist of beta catenin 1
ENSG00000140406	TLNRD1	1.03662	5.52587e-08	1.03124	5.80476e-08	significant	potassium channel tetramerization domain containing 11
ENSG00000054967	RELT	1.69336	6.02527e-08	1.64145	3.74549e-10	significant	glial cell derived neurotrophic factor
ENSG00000167772	ANGPTL4	2.66154	2.10632e-07	3.07287	1.57835e-12	significant	BCL3 transcription coactivator
ENSG00000227220		1.92582	2.10632e-07	2.05889	0.000255675	significant	platelet derived growth factor subunit A
ENSG00000112715	VEGFA	2.35684	2.57758e-07	2.78234	4.53765e-15	significant
ENSG00000168621	GDNF	2.13323	2.60394e-07	2.89502	3.08398e-14	significant	insulin induced gene 1
ENSG00000273038		0.8719	2.84458e-07	0.947253	0.000131484	significant	nocturnin
ENSG00000127528	KLF2	1.56009	3.01054e-07	2.02492	4.19319e-20	significant	serum/glucocorticoid regulated kinase 1
ENSG00000143514	TP53BP2	0.7478	3.01054e-07	1.07638	6.11982e-06	significant	midnolin
ENSG00000156273	BACH1	0.7625	3.48877e-07	0.676554	0.000183057	significant	fibroblast growth factor 18
ENSG00000181026	AEN	0.559956	4.50838e-07	0.537735	0.000572667	significant	ras homolog family member B
ENSG00000116717	GADD45A	1.28589	5.02784e-07	1.15496	6.5242e-05	significant	prostate transmembrane protein, androgen induced 1
ENSG00000176444	CLK2	-0.763084	6.37438e-07	-0.608332	0.00429463	significant
ENSG00000198576	ARC	4.93184	7.34278e-07	4.47634	5.94152e-10	significant	uridine phosphorylase 1
ENSG00000173846	PLK3	1.74803	7.77217e-07	1.87759	1.98038e-07	significant
ENSG00000213859	KCTD11	2.15169	1.00643e-06	1.8648	0.0005248	significant	period circadian regulator 1
ENSG00000251474	RPL32P3	-1.08437	1.22495e-06	-0.710618	0.0324017	significant	intermediate filament family orphan 2
ENSG00000112658	SRF	1.29016	1.49675e-06	1.02744	9.21519e-08	significant	SERTA domain containing 1
ENSG00000167470	MIDN	2.02231	1.63575e-06	1.75323	1.72017e-06	significant
ENSG00000278998		5.9149	2.27854e-06	4.26284	2.04986e-14	significant	hes related family bHLH transcription factor with YRPW motif 1
ENSG00000169991	IFFO2	1.9389	2.31228e-06	1.66425	4.68977e-06	significant	retinoic acid receptor alpha
ENSG00000188215	DCUN1D3	1.08157	3.50203e-06	1.29794	3.2444e-07	significant	scleraxis bHLH transcription factor
ENSG00000168994	PXDC1	1.65479	3.64105e-06	1.40886	8.50349e-05	significant	prostaglandin-endoperoxide synthase 2
ENSG00000243225		6.70631	3.76827e-06	3.6242		not_significant	neural precursor cell expressed, developmentally down-regulated 9
ENSG00000111859	NEDD9	1.83013	4.28331e-06	2.11074	0.000156865	significant	period circadian regulator 2
ENSG00000135111	TBX3	1.36112	4.6564e-06	1.48911	9.63769e-14	significant	coagulation factor III, tissue factor
ENSG00000224959		2.5689	4.6564e-06	2.05943	0.000392616	significant	zinc finger protein 385A
ENSG00000167173	C15orf39	1.11105	5.03111e-06	0.80756	7.79882e-07	significant
ENSG00000162702	ZNF281	1.29092	8.10815e-06	1.40586	3.09639e-06	significant	polo like kinase 3
ENSG00000170525	PFKFB3	1.37581	8.32321e-06	1.40656	0.000421511	significant	MYC proto-oncogene, bHLH transcription factor
ENSG00000196843	ARID5A	1.08423	8.99232e-06	1.19895	0.000166625	significant	tuftelin 1
ENSG00000145632	PLK2	1.30368	1.07524e-05	0.535807	0.628922	not_significant	TCDD inducible poly(ADP-ribose) polymerase
ENSG00000136826	KLF4	1.29201	1.17254e-05	1.88704	5.28536e-10	significant	neuroepithelial cell transforming 1
ENSG00000255176		2.19821	1.17461e-05	2.58372	4.81843e-08	significant	ELM2 and Myb/SANT domain containing 1
ENSG00000259884		5.40043	1.17577e-05	5.01866	6.69586e-08	significant	RELT TNF receptor
ENSG00000148841	ITPRIP	1.27155	1.22192e-05	2.23893	1.08138e-10	significant	Kruppel like factor 7
ENSG00000215908	CROCCP2	-0.917665	1.3273e-05	-0.868176	0.000861102	significant	sosondowah ankyrin repeat domain family member C
ENSG00000136603	SKIL	2.37357	1.3514e-05	2.10834	1.8086e-05	significant	jumonji domain containing 6, arginine demethylase and lysine hydroxylase
ENSG00000120738	EGR1	3.16638	1.41348e-05	2.42202	0.00536908	significant	HIC ZBTB transcriptional repressor 1
ENSG00000138166	DUSP5	1.6526	1.53555e-05	1.93122	8.55828e-09	significant	suppressor of cytokine signaling 1
ENSG00000070718	AP3M2	-0.648678	1.57927e-05	-0.380835	0.131926	not_significant	PX domain containing 1
ENSG00000119669	IRF2BPL	1.27871	1.64489e-05	1.5218	6.35036e-08	significant	GTP binding protein overexpressed in skeletal muscle
ENSG00000158691	ZSCAN12	-1.07173	1.8841e-05	-0.895236	0.00948085	significant
ENSG00000146556	WASH2P	-0.868637	2.09649e-05	-0.521848	0.108231	not_significant	dual specificity phosphatase 5
ENSG00000198355	PIM3	1.22017	2.12649e-05	0.986187	0.00508726	significant	snail family transcriptional repressor 1
ENSG00000172273	HINFP	-0.597789	2.24669e-05	-0.549811	0.0199405	significant	G protein-coupled receptor 75
ENSG00000095752	IL11	3.40796	2.2741e-05	4.52576	2.20363e-08	significant	Kruppel like factor 2
ENSG00000177426	TGIF1	1.06636	2.29999e-05	1.08281	0.00893235	significant	serpin family E member 1
ENSG00000176749	CDK5R1	1.15669	2.47051e-05	0.716657	0.138454	not_significant	ERBB receptor feedback inhibitor 1
ENSG00000168264	IRF2BP2	0.831553	2.68318e-05	1.05235	1.6659e-05	significant	FOS like 1, AP-1 transcription factor subunit
ENSG00000143322	ABL2	0.941516	4.51007e-05	1.00402	9.36199e-06	significant	protocadherin 9
ENSG00000147883	CDKN2B	0.815804	4.79771e-05	0.296813	0.65125	not_significant
ENSG00000175592	FOSL1	1.456	4.85622e-05	1.54958	8.42654e-09	significant	MCL1 apoptosis regulator, BCL2 family member
ENSG00000073756	PTGS2	1.84085	5.35896e-05	1.99139	0.000169998	significant	protein phosphatase 1 regulatory subunit 15B
ENSG00000131759	RARA	1.89788	5.51496e-05	1.72792	1.57312e-05	significant	zinc finger and BTB domain containing 21
ENSG00000223547	ZNF844	-0.971141	5.93384e-05	-0.899767	0.0590219	not_significant	6-phosphofructo-2-kinase/fructose-2,6-biphosphatase 3
ENSG00000143367	TUFT1	1.72372	6.50776e-05	1.3766	0.00152608	significant	cellular communication network factor 1
ENSG00000185650	ZFP36L1	1.02952	6.50776e-05	1.04149	0.0019659	significant	T-box 3
ENSG00000164933	SLC25A32	0.648932	7.02105e-05	0.554841	0.0398517	significant	family with sequence similarity 83 member G
ENSG00000223749	MIR503HG	3.25955	7.02105e-05	3.32177	0.000530464	significant	solute carrier family 25 member 25
ENSG00000235636		6.55789	7.29098e-05	0.157673	0.999825	not_significant	uncharacterized LOC145694
ENSG00000260428	SCX	1.89599	8.03293e-05	1.12595	0.147404	not_significant	polo like kinase 2
ENSG00000196724	ZNF418	-1.02781	9.0092e-05	-0.709058	0.182633	not_significant	BTB domain containing 19
ENSG00000062716	VMP1	0.770152	9.29545e-05	0.568579	0.12783	not_significant	transmembrane protein 41B
ENSG00000106366	SERPINE1	1.51099	9.5165e-05	1.48991	5.89927e-08	significant	kelch like family member 21
ENSG00000132326	PER2	1.80422	0.000106015	1.6477	0.0536598	not_significant	Kruppel like factor 4
ENSG00000163961	RNF168	0.598369	0.000106015	0.708296	0.0133145	significant	zinc finger protein 281
ENSG00000080947	CROCCP3	-0.809607	0.000164538	-0.565031	0.20453	not_significant	serum response factor
ENSG00000254510		2.65986	0.000195203	1.88438	0.000471569	significant	growth arrest and DNA damage inducible alpha
ENSG00000222009	BTBD19	1.30189	0.000204126	1.34277	6.0291e-05	significant	interferon regulatory factor 2 binding protein like
ENSG00000177374	HIC1	1.66396	0.000229526	1.73469	0.00207756	significant	TEN1-CDK3 readthrough (NMD candidate)
ENSG00000103199	ZNF500	-0.666818	0.000243019	-0.55933	0.221791	not_significant	inositol 1,4,5-trisphosphate receptor interacting protein
ENSG00000253837	LOC100507156	1.10572	0.000264046	0.32488	0.870631	not_significant
ENSG00000258839	MC1R	0.512426	0.000285239	0.424459	0.68048	not_significant	Pim-3 proto-oncogene, serine/threonine kinase
ENSG00000166133	RPUSD2	-0.826589	0.000285384	-0.66513	0.19537	not_significant	transforming growth factor beta receptor 1
ENSG00000134259	NGF	0.854496	0.000297699	1.13299	3.68186e-05	significant	TSC22 domain family member 3
ENSG00000173848	NET1	1.70592	0.000297699	1.81243	3.17301e-07	significant	forkhead box C2
ENSG00000125347	IRF1	0.716986	0.000308299	0.322216	0.879708	not_significant
ENSG00000189143	CLDN4	2.66261	0.000308299	3.11653	9.64545e-08	significant	sprouty RTK signaling antagonist 4
ENSG00000258602	LINC01629	5.46437	0.000311131	2.94449		not_significant	cyclin dependent kinase 5 regulatory subunit 1
ENSG00000166471	TMEM41B	1.2976	0.000319727	1.57822	4.10526e-06	significant	SERTA domain containing 3
ENSG00000116285	ERRFI1	1.47149	0.000320139	1.35857	7.12529e-06	significant	BCL6 corepressor
ENSG00000122644	ARL4A	0.839916	0.000346168	0.286401	0.952176	not_significant	NFKB inhibitor alpha
ENSG00000131127	ZNF141	-0.708706	0.000353541	0.102765	0.999825	not_significant	musculin
ENSG00000135679	MDM2	0.578813	0.000353541	0.5618	0.160419	not_significant
ENSG00000124225	PMEPA1	2.00342	0.000354542	2.43879	0.013326	significant	chromosome 15 open reading frame 39
ENSG00000259426	LOC145694	1.30616	0.00046367	0.91089	0.0228309	significant	zinc finger protein 267
ENSG00000104221	BRF2	-0.681663	0.000476028	-0.727629	0.00556371	significant	uncharacterized LOC100507156
ENSG00000140332	TLE3	0.857564	0.000476028	0.994241	0.00173144	significant	parathyroid hormone like hormone
ENSG00000186812	ZNF397	-0.62699	0.000518199	-0.482624	0.00875489	significant	GLIS family zinc finger 2
ENSG00000278970	HEIH	-0.572416	0.000593387	-0.696085	9.38471e-07	significant	LIM zinc finger domain containing 4
ENSG00000169018	FEM1B	0.905483	0.000664656	0.950529	0.000177845	significant	AT-rich interaction domain 5A
ENSG00000138835	RGS3	0.807379	0.000687545	0.949052	0.00266024	significant	defective in cullin neddylation 1 domain containing 3
ENSG00000228495	LINC01013	3.08741	0.000721679	1.08507	0.806973	not_significant	zinc finger SWIM-type containing 4
ENSG00000167178	ISLR2	4.25438	0.000737897	2.06492	0.119803	not_significant	TGFB induced factor homeobox 1
ENSG00000254884		2.98702	0.000765512	3.9278	1.25587e-11	significant
ENSG00000144026	ZNF514	-0.56595	0.000806631	-0.429829	0.0659831	not_significant	immediate early response 5
ENSG00000154642	C21orf91	0.872932	0.000806631	0.643583	0.0324017	significant	MAF bZIP transcription factor F
ENSG00000170852	KBTBD2	0.754471	0.000806631	0.484811	0.0148679	significant	Jun proto-oncogene, AP-1 transcription factor subunit
ENSG00000184635	ZNF93	0.872469	0.000806631	0.307565	0.999825	not_significant	talin rod domain containing 1
ENSG00000168386	FILIP1L	0.805799	0.000974327	0.354251	0.594946	not_significant	ZFP36 ring finger protein like 1
ENSG00000234072		-0.901094	0.00098021	-0.385861	0.640946	not_significant	nucleolar protein 4 like
ENSG00000167565	SERTAD3	1.15344	0.00114649	1.04186	0.00220872	significant	regulator of calcineurin 1
ENSG00000243406	MRPS31P5	-1.10603	0.00123815	-1.00802	0.00582815	significant	ADAMTSL4 antisense RNA 1
ENSG00000179820	MYADM	0.711328	0.00138698	0.65193	1.04191e-06	significant	THO complex 6
ENSG00000125812	GZF1	0.740877	0.0015053	1.96814	1.86125e-06	significant	ETS proto-oncogene 1, transcription factor
ENSG00000280063		-0.81011	0.00160351	-0.401618	0.439802	not_significant	MAF bZIP transcription factor K
ENSG00000167625	ZNF526	-0.557224	0.00165889	-0.610753	0.103535	not_significant	ABL proto-oncogene 2, non-receptor tyrosine kinase
ENSG00000119737	GPR75	1.61151	0.00171092	1.63281	0.000312634	significant	aldehyde dehydrogenase 1 family member B1
ENSG00000124549	BTN2A3P	-0.807002	0.00190582	-0.554626	0.29291	not_significant	zinc finger protein 697
ENSG00000162971	TYW5	-0.663419	0.00200285	-0.606098	0.0203037	significant	fem-1 homolog B
ENSG00000116922	C1orf109	-0.611944	0.00214049	-0.394864	0.277008	not_significant	mitogen-activated protein kinase kinase kinase 8
ENSG00000256448		3.72284	0.00214049	3.01656	0.00543891	significant	purinergic receptor P2Y11
ENSG00000135245	HILPDA	-0.749859	0.00250272	-0.118482	0.999825	not_significant	SPOC domain containing 1
ENSG00000174353	TRIM74	-0.622129	0.00263689	-0.415246	0.0143801	significant	chromosome 21 open reading frame 91
ENSG00000143333	RGS16	3.09895	0.00268719	3.4341	2.7286e-09	significant	zinc finger protein 93
ENSG00000130522	JUND	0.788754	0.0027906	0.923387	0.0205277	significant
ENSG00000275993	SIK1B	3.37086	0.00297962	5.09653	5.27503e-08	significant	caveolae associated protein 4
ENSG00000227619		2.63295	0.00300001	3.31405	0.00111027	significant	WEE1 G2 checkpoint kinase
ENSG00000185670	ZBTB3	-0.885529	0.00311598	-0.95254	0.00610681	significant	TLE family member 3, transcriptional corepressor
ENSG00000196182	STK40	0.717693	0.00315224	1.01387	0.00138216	significant	AT-rich interaction domain 3B
ENSG00000251022	THAP9-AS1	-0.71746	0.0031726	-0.40371	0.147633	not_significant	cyclin L1
ENSG00000185947	ZNF267	1.11088	0.00317674	0.754485	0.0352361	significant	nerve growth factor
ENSG00000170836	PPM1D	0.626696	0.0033295	0.315409	0.23313	not_significant	ST3 beta-galactoside alpha-2,3-sialyltransferase 1
ENSG00000170802	FOXN2	0.650715	0.00338995	0.579192	0.10018	not_significant	sestrin 2
ENSG00000198517	MAFK	0.942696	0.00340732	1.53456	5.16038e-05	significant	cytoplasmic polyadenylation element binding protein 2
ENSG00000141026	MED9	-0.622112	0.00363231	-0.527859	0.00484935	significant	basonuclin 1
ENSG00000197461	PDGFA	2.09836	0.00376283	1.74766	0.000949937	significant	ADP ribosylation factor like GTPase 4A
ENSG00000142867	BCL10	0.713356	0.00379816	0.610687	0.000183197	significant	MAX network transcriptional repressor
ENSG00000204569	PPP1R10	0.531953	0.00379816	0.184744	0.903569	not_significant	interferon regulatory factor 2 binding protein 2
ENSG00000174365	SNHG11	-0.666471	0.00381389	-0.741376	0.0013841	significant	cyclin dependent kinase inhibitor 2B
ENSG00000096717	SIRT1	0.627137	0.00414076	0.688666	0.00332613	significant	phosphatidylinositol specific phospholipase C X domain containing 1
ENSG00000105136	ZNF419	-1.03638	0.00414275	-0.762583	0.0019436	significant	regulator of G protein signaling 3
ENSG00000222041	CYTOR	0.580971	0.00420097	0.343251	0.299548	not_significant	filamin A interacting protein 1 like
ENSG00000251493	FOXD1	0.649338	0.00420097	0.719273	3.74549e-10	significant	angiomotin like 2
ENSG00000143751	SDE2	0.56655	0.00427419	0.60821	0.0260529	significant	JunD proto-oncogene, AP-1 transcription factor subunit
ENSG00000279821		1.99944	0.00438847	1.53803	0.000654084	significant	vacuole membrane protein 1
ENSG00000272159		1.75771	0.00442146	2.40954	3.17952e-06	significant	DnaJ heat shock protein family (Hsp40) member B1
ENSG00000275111	ZNF2	-0.778612	0.00449239	-0.837068	0.0599695	not_significant	BTB domain and CNC homolog 1
ENSG00000244165	P2RY11	0.879684	0.00465617	0.297995	0.781764	not_significant	kelch repeat and BTB domain containing 2
ENSG00000174343	CHRNA9	2.97663	0.00483702	1.87042	0.132915	not_significant	spalt like transcription factor 1
ENSG00000249087	ZNF436-AS1	-1.45386	0.00502386	-1.45001	0.000736595	significant	tumor protein p53 binding protein 2
ENSG00000132003	ZSWIM4	1.07856	0.00506422	1.01141	0.00798308	significant	CDC42 effector protein 2
ENSG00000166483	WEE1	0.861724	0.00540802	0.7452	0.217607	not_significant	GDNF inducible zinc finger protein 1
ENSG00000184226	PCDH9	1.41389	0.00540802	1.26028	0.0475366	significant	tumor protein p53 inducible nuclear protein 2
ENSG00000126603	GLIS2	1.09529	0.00553836	0.939898	0.0108764	significant	ZNF674 antisense RNA 1 (head to head)
ENSG00000223705	NSUN5P1	-0.575774	0.00556123	-0.458953	0.0355779	significant	MIR22 host gene
ENSG00000100906	NFKBIA	1.11962	0.00557936	1.17179	1.23086e-06	significant	serine/threonine kinase 40
ENSG00000204611	ZNF616	-0.628933	0.0058345	-0.580027	0.159887	not_significant	interferon regulatory factor 1
ENSG00000187626	ZKSCAN4	-1.29475	0.00633971	-1.25	0.000326822	significant	BCL10 immune signaling adaptor
ENSG00000174010	KLHL15	0.621009	0.00643176	0.944742	0.000321263	significant	myeloid associated differentiation marker
ENSG00000185946	RNPC3	-0.805546	0.00666034	-0.607144	0.0803045	not_significant	yrdC N6-threonylcarbamoyltransferase domain containing
ENSG00000106799	TGFBR1	1.21912	0.00669156	1.36104	0.000110196	significant	protein phosphatase 1 regulatory subunit 15A
ENSG00000162775	RBM15	0.622014	0.00686503	0.472406	0.0637068	not_significant	cyclin dependent kinase inhibitor 1A
ENSG00000111276	CDKN1B	-0.763735	0.00710475	-0.700446	0.00774754	significant	chondroitin sulfate synthase 1
ENSG00000176700		-0.611351	0.00710475	-0.317296	0.88917	not_significant	zinc finger protein 548
ENSG00000279227		1.26813	0.00737242	0.0738765	0.999825	not_significant	cytoplasmic polyadenylation element binding protein 4
ENSG00000078804	TP53INP2	0.734313	0.00742235	0.81497	0.048992	significant	forkhead box N2
ENSG00000179094	PER1	1.95551	0.00766846	2.66787	0.0243163	significant	forkhead box D1
ENSG00000239218		1.19227	0.00793575	1.67297	2.18954e-05	significant	solute carrier family 25 member 32
ENSG00000111664	GNB3	-0.825941	0.00902343	-0.381366	0.546323	not_significant	DLC1 Rho GTPase activating protein
ENSG00000244560	LOC155060	-0.597864	0.00902343	-0.362764	0.506282	not_significant	sirtuin 1
ENSG00000185022	MAFF	1.05111	0.00939633	1.09856	4.57934e-09	significant	protein phosphatase, Mg2+/Mn2+ dependent 1D
ENSG00000163026	WDCP	-0.757484	0.00943795	-0.803177	0.181587	not_significant	RNA binding motif protein 15
ENSG00000088876	ZNF343	-0.513697	0.0101189	-0.487037	0.0496366	significant	kelch like family member 15
ENSG00000188785	ZNF548	0.669095	0.0101196	0.547832	0.00534626	significant	autophagy related 101
ENSG00000185730	ZNF696	-0.641435	0.0101516	-0.355005	0.708414	not_significant	ring finger protein 168
ENSG00000223509		-0.684057	0.0101516	-0.309748	0.620983	not_significant	endoplasmic reticulum to nucleus signaling 1
ENSG00000196150	ZNF250	-0.615854	0.0101859	-0.329582	0.581773	not_significant	pleckstrin homology like domain family B member 1
ENSG00000139372	TDG	0.582902	0.0102033	0.431835	0.241365	not_significant	E74 like ETS transcription factor 4
ENSG00000114019	AMOTL2	0.795563	0.0103611	0.891355	0.0044302	significant	thymine DNA glycosylase
ENSG00000161638	ITGA5	0.57429	0.0104327	0.299244	0.311169	not_significant	cytoskeleton regulator RNA
ENSG00000198551	ZNF627	-0.582685	0.0107664	-0.459359	0.149193	not_significant	MDM2 proto-oncogene
ENSG00000019144	PHLDB1	0.594672	0.0109118	0.992209	0.000265755	significant	dual specificity tyrosine phosphorylation regulated kinase 3
ENSG00000239948		1.96318	0.010997	2.99564	8.44041e-05	significant	integrin subunit alpha 5
ENSG00000143067	ZNF697	0.918946	0.0111151	0.78777	0.141666	not_significant	kelch like family member 26
ENSG00000176692	FOXC2	1.20746	0.0112542	1.67174	0.00503118	significant	SDE2 telomere maintenance homolog
ENSG00000197183	NOL4L	1.02285	0.0113103	0.944572	0.0598603	not_significant	prickle planar cell polarity protein 2
ENSG00000137124	ALDH1B1	0.933832	0.0120109	0.798073	0.0302391	significant	apoptosis enhancing nuclease
ENSG00000130766	SESN2	0.850903	0.0124502	0.564742	0.339568	not_significant	EGF domain specific O-linked N-acetylglucosamine transferase
ENSG00000186480	INSIG1	2.05566	0.0127898	1.72505	0.000289067	significant	cyclin dependent kinase 7
ENSG00000089335	ZNF302	-0.555475	0.0129317	-0.451779	0.27702	not_significant	RUN and SH3 domain containing 2
ENSG00000149798	CDC42EP2	0.741452	0.0130341	0.936092	0.00197816	significant	protein phosphatase 1 regulatory subunit 10
ENSG00000134668	SPOCD1	0.873035	0.0130681	1.09757	2.69748e-06	significant	transmembrane protein 170A
ENSG00000116679	IVNS1ABP	0.502682	0.0132704	0.22821	0.825955	not_significant	AMMECR1 like
ENSG00000087494	PTHLH	1.10548	0.0141764	1.42065	0.00356708	significant	melanocortin 1 receptor
ENSG00000197128	ZNF772	-0.565653	0.0146018	-0.451159	0.119803	not_significant	PPARG related coactivator 1
ENSG00000164949	GEM	1.65397	0.015421	3.04615	5.07917e-08	significant	influenza virus NS1A binding protein
ENSG00000204237	OXLD1	-0.551915	0.0155998	-0.657155	0.00207798	significant	zinc finger protein 350
ENSG00000134058	CDK7	0.541881	0.0156004	0.629723	0.0430023	significant	TMEM147 antisense RNA 1
ENSG00000188522	FAM83G	1.35497	0.015647	1.62331	0.000278416	significant	zinc finger protein 343
ENSG00000167487	KLHL26	0.568084	0.0156643	0.743133	0.10585	not_significant	leucine rich repeats and immunoglobulin like domains 2
ENSG00000127989	MTERF1	-0.585322	0.0156955	-0.0464882	0.999825	not_significant
ENSG00000178860	MSC	1.11336	0.0161623	0.641923	0.0513435	not_significant	oxidoreductase like domain containing 1
ENSG00000212694	LINC01089	-0.723406	0.0161809	-0.902241	0.000812345	significant	zinc finger protein 302
ENSG00000185338	SOCS1	1.65831	0.0162014	1.2858	0.00323785	significant	zinc finger protein 526
ENSG00000203804	ADAMTSL4-AS1	1.00811	0.0163111	1.52806	1.87655e-05	significant	zinc finger protein 473
ENSG00000186594	MIR22HG	0.720487	0.0163349	0.908739	0.0279518	significant	zinc finger protein 772
ENSG00000249471	ZNF324B	-0.704422	0.0164413	-0.608782	0.352069	not_significant	zinc finger protein 514
ENSG00000070444	MNT	0.839132	0.0165946	0.939663	0.13354	not_significant	coiled-coil domain containing 142
ENSG00000157514	TSC22D3	1.21063	0.0165946	1.31266	0.000411681	significant	hepatocellular carcinoma up-regulated EZH2-associated long non-coding RNA
ENSG00000143479	DYRK3	0.576553	0.0170083	0.814478	0.000235211	significant	NSUN5 pseudogene 1
ENSG00000267680	ZNF224	-0.62223	0.0170477	-0.386712	0.04021	significant	zinc finger protein 627
ENSG00000133624	ZNF767P	-0.641011	0.0174141	-0.58945	0.0104978	significant	mitochondrial transcription termination factor 1
ENSG00000280143		1.41308	0.0177529	1.28715	0.000572667	significant	zinc finger protein 773
ENSG00000123395	ATG101	0.605838	0.0182403	0.800793	0.0404919	significant	histone H4 transcription factor
ENSG00000124279	FASTKD3	-0.621548	0.0191346	-0.276619	0.790382	not_significant	AI894139 pseudogene
ENSG00000087074	PPP1R15A	0.691121	0.0191681	0.583233	0.362206	not_significant	zinc finger protein 813
ENSG00000142178	SIK1	3.75615	0.0205738	5.09628	1.05422e-06	significant
ENSG00000256671	LIMS4	1.09224	0.0210211	1.48528	3.03884e-05	significant	chromosome 1 open reading frame 109
ENSG00000137449	CPEB2	0.848088	0.0212595	1.38371	0.000346655	significant	zinc finger protein 549
ENSG00000164741	DLC1	0.627945	0.0218198	0.684098	0.0512044	not_significant	zinc finger protein 250
ENSG00000159200	RCAN1	1.0204	0.021847	1.41872	1.26808e-15	significant	FAST kinase domains 3
ENSG00000124216	SNAI1	1.63549	0.0218625	2.63611	5.29531e-06	significant	mediator complex subunit 9
ENSG00000083814	ZNF671	-0.746469	0.0223044	-0.999949	0.000108344	significant	tripartite motif containing 74
ENSG00000183337	BCOR	1.14304	0.0231077	1.38328	0.00459677	significant	zinc finger protein 224
ENSG00000166822	TMEM170A	0.52646	0.0232142	0.430914	0.175916	not_significant	zinc finger protein 397
ENSG00000131849	ZNF132	-0.637216	0.0236664	-0.741905	0.0197354	significant	zinc finger protein 616
ENSG00000113742	CPEB4	0.657946	0.0238541	1.06775	0.000235211	significant	zinc finger protein 132
ENSG00000237892		2.25536	0.0239303	1.22658	0.114497	not_significant	zinc finger family member 767, pseudogene
ENSG00000163378	EOGT	0.551206	0.0242381	0.51762	0.0435894	significant	zinc finger protein 696
ENSG00000261408	TEN1-CDK3	1.27449	0.0246152	1.28892	0.156502	not_significant	adaptor related protein complex 3 subunit mu 2
ENSG00000156427	FGF18	2.01515	0.0247488	2.68228	0.0106659	significant	tRNA-yW synthesizing protein 5
ENSG00000179361	ARID3B	0.856511	0.0256316	1.67524	0.000433817	significant	small nucleolar RNA host gene 11
ENSG00000182378	PLCXD1	0.810555	0.0256316	1.19303	0.00154797	significant	zinc finger protein 500
ENSG00000135637	CCDC142	-0.571623	0.0264097	-0.485505	0.225177	not_significant	zinc finger and SCAN domain containing 20
ENSG00000256683	ZNF350	-0.503101	0.0266645	-0.189509	0.952144	not_significant	BRF2 RNA polymerase III transcription initiation factor subunit
ENSG00000164683	HEY1	1.91132	0.0267861	0.523174	0.901156	not_significant
ENSG00000187678	SPRY4	1.18232	0.0272357	1.5249	9.06134e-09	significant	zinc finger protein 550
ENSG00000144233	AMMECR1L	0.519487	0.0278004	0.581587	0.0137026	significant	zinc finger protein 324B
ENSG00000186300	ZNF555	-0.967335	0.0278101	-0.97472	0.00152632	significant	zinc finger protein 141
ENSG00000277072		-0.741089	0.0279086	-0.3757	0.620379	not_significant	THAP9 antisense RNA 1
ENSG00000142528	ZNF473	-0.563426	0.0287874	-0.390476	0.801092	not_significant	long intergenic non-protein coding RNA 1089
ENSG00000279283		2.0803	0.0291918	2.16435	0.00683842	significant	zinc ribbon domain containing 1 antisense, pseudogene
ENSG00000152439	ZNF773	-0.594253	0.0295311	-0.343548	0.307981	not_significant	chromosome 12 open reading frame 76
ENSG00000198799	LRIG2	-0.520901	0.0305158	-0.589514	0.00893147	significant
ENSG00000198853	RUSC2	0.53674	0.0308821	0.644662	0.0295124	significant	zinc finger protein 671
ENSG00000263050		3.79739	0.0312622	6.5706	3.76758e-06	significant	hypoxia inducible lipid droplet associated
ENSG00000124762	CDKN1A	0.686987	0.0315798	0.596089	0.112177	not_significant	WD repeat and coiled coil containing
ENSG00000119508	NR4A3	2.31602	0.0321542	4.44912	2.18232e-05	significant	CDC like kinase 2
ENSG00000163637	PRICKLE2	0.564442	0.0321542	0.49857	0.270279	not_significant	cyclin dependent kinase inhibitor 1B
ENSG00000102034	ELF4	0.587178	0.0325719	0.606072	0.00700903	significant	zinc finger protein 2
ENSG00000196449	YRDC	0.691464	0.0325719	0.746499	0.0180693	significant	RNA binding region (RNP1, RRM) containing 3
ENSG00000131873	CHSY1	0.674661	0.0329475	1.30885	0.00113852	significant	butyrophilin subfamily 2 member A3, pseudogene
ENSG00000177606	JUN	1.03795	0.0329475	1.71019	5.93863e-06	significant	CROCC pseudogene 3
ENSG00000174456	C12orf76	-0.740662	0.0330727	-0.549658	0.23313	not_significant
ENSG00000121406	ZNF549	-0.614405	0.0346161	-0.475614	0.50223	not_significant	G protein subunit beta 3
ENSG00000148840	PPRC1	0.502692	0.0347901	0.582171	0.0167692	significant	RNA pseudouridine synthase domain containing 2
ENSG00000198346	ZNF813	-0.609425	0.0350036	-0.296048	0.904676	not_significant	WASP family homolog 2, pseudogene
ENSG00000270882	HIST2H4A	-0.919055	0.0358329	0.238323	0.999825	not_significant	chromosome 8 open reading frame 44
ENSG00000107968	MAP3K8	0.899944	0.0360399	0.899474	0.133686	not_significant	zinc finger and BTB domain containing 3
ENSG00000251369	ZNF550	-0.693864	0.0373967	-0.49706	0.280256	not_significant	WASP family homolog 5, pseudogene
ENSG00000213865	C8orf44	-0.882019	0.0380961	-0.773047	0.0764403	not_significant
ENSG00000008513	ST3GAL1	0.852056	0.0383668	0.842633	0.106201	not_significant	CROCC pseudogene 2
ENSG00000169594	BNC1	0.846846	0.0387393	1.11512	0.000310846	significant	histone cluster 2 H4 family member a
ENSG00000236144	TMEM147-AS1	-0.505981	0.038742	-0.58208	0.0239299	significant	zinc finger protein 564
ENSG00000121903	ZSCAN20	-0.67495	0.0404462	-0.356487	0.811142	not_significant	NHL repeat containing E3 ubiquitin protein ligase 1
ENSG00000230844	ZNF674-AS1	0.73105	0.0440046	0.94662	0.00200038	significant	zinc finger protein 555
ENSG00000228830		1.11296	0.0458219	1.0389	0.249777	not_significant	zinc finger protein 844
ENSG00000170681	CAVIN4	0.865406	0.0481389	1.2273	0.000854998	significant	zinc finger protein 418
ENSG00000182484		-0.525781	0.0481389	-0.547511	0.00523967	significant	zinc finger protein 419
ENSG00000178607	ERN1	0.596339	0.0491002	0.663704	0.00459677	significant	zinc finger protein 19
ENSG00000268942		5.34261	0.0492213	-0.337038	0.999825	not_significant	zinc finger and SCAN domain containing 12
ENSG00000269609	RPARP-AS1	-1.60516	0.00170581	-0.827499	0.218826	not_significant
ENSG00000204623	ZNRD1ASP	-0.72837	0.00194757	-0.827817	6.3372e-05	significant	ribosomal protein L32 pseudogene 3
ENSG00000260597		-1.07492	0.00275532	-1.00922	0.0773973	not_significant	mitochondrial ribosomal protein S31 pseudogene 5
ENSG00000249709	ZNF564	-0.951663	0.00384059	-0.890782	0.033384	significant	zinc finger with KRAB and SCAN domains 4
ENSG00000157429	ZNF19	-1.051	0.0140225	-1.2668	0.00895453	significant	ZNF436 antisense RNA 1
ENSG00000187566	NHLRC1	-0.953078	0.020455	-0.924024	0.393059	not_significant	RPARP antisense RNA 1

## Sheet: Δ94-97S vs Ctrl 1 h TGF-β
Full list of genes differentially regulated by TGF-b in the Control Fibroblasts versus Δ S94-97 fibroblasts after 1 hrs
Genes are significantly differentially expressed in the control cell line with an absolute log2 fold change of at least 0.5 and detected with at least 2 TPM in the control cell lines.
Genes highlighted in red are the not significant in Δ S94-97 fibroblasts and they have been shown by the heatmaps and box plots in Supplementary Figure 6. Genes in bold were validated by qPCR (Supplementary Figure 7)
		Control fibroblasts 1 hrs vs 0		Δ S94-97 fibroblasts 1 hrs vs 0
Ensembl Gene ID	Symbol	Normalized log2Fold Change	padj.	Normalized log2Fold Change	padj	significant in Δ S94-97	Gene Name
ENSG00000125740	FOSB	8.44268	1.0149e-120	8.69811	1.99702e-153	significant	FosB proto-oncogene, AP-1 transcription factor subunit
ENSG00000122877	EGR2	7.58332	2.37802e-24	6.85831	2.28716e-32	significant	early growth response 2
ENSG00000243225		6.70631	3.76827e-06	9.09356	3.0566e-14	significant
ENSG00000170345	FOS	6.64367	4.48261e-69	5.39692	4.22992e-15	significant	Fos proto-oncogene, AP-1 transcription factor subunit
ENSG00000235636	NUS1P1	6.55789	7.29098e-05	0.588293	0.999865	not_significant
ENSG00000167874	TMEM88	6.41218	2.82974e-18	5.50883	3.25009e-18	significant	transmembrane protein 88
ENSG00000278998		5.9149	2.27854e-06	4.58752	3.44109e-11	significant
ENSG00000258602	LINC01629	5.46437	0.000311131	7.72731	1.5928e-14	significant	long intergenic non-protein coding RNA 1629
ENSG00000179388	EGR3	5.42251	1.91171e-13	6.02578	1.46912e-137	significant	early growth response 3
ENSG00000259884		5.40043	1.17577e-05	4.20538	1.36057e-06	significant
ENSG00000268942	CKS1BP3	5.34261	0.0492213	0.165556	0.999865	not_significant
ENSG00000137331	IER3	5.18917	8.75152e-56	4.58897	1.26417e-130	significant	immediate early response 3
ENSG00000198576	ARC	4.93184	7.34278e-07	4.40567	1.62354e-12	significant	activity regulated cytoskeleton associated protein
ENSG00000128342	LIF	4.70085	3.43303e-10	5.56649	1.95546e-24	significant	LIF interleukin 6 family cytokine
ENSG00000123358	NR4A1	4.7004	3.70338e-10	4.13961	1.42582e-18	significant	nuclear receptor subfamily 4 group A member 1
ENSG00000114315	HES1	4.61336	5.23417e-12	5.30608	3.31698e-41	significant	hes family bHLH transcription factor 1
ENSG00000166592	RRAD	4.51015	1.62336e-23	4.11085	3.28436e-14	significant	RRAD, Ras related glycolysis inhibitor and calcium channel regulator
ENSG00000162772	ATF3	4.37933	5.56988e-59	2.7844	6.28077e-23	significant	activating transcription factor 3
ENSG00000171223	JUNB	4.32867	2.3123e-33	4.10228	7.86332e-59	significant	JunB proto-oncogene, AP-1 transcription factor subunit
ENSG00000158050	DUSP2	4.2785	2.82808e-14	4.82078	1.4192e-42	significant	dual specificity phosphatase 2
ENSG00000134107	BHLHE40	4.2741	9.67899e-28	4.27015	1.39104e-36	significant	basic helix-loop-helix family member e40
ENSG00000167178	ISLR2	4.25438	0.000737897	3.26185	0.0278385	significant	immunoglobulin superfamily containing leucine rich repeat 2
ENSG00000174576	NPAS4	4.04003	1.94895e-11	3.67306	5.6101e-24	significant	neuronal PAS domain protein 4
ENSG00000173334	TRIB1	3.87757	7.58967e-24	3.3314	2.14307e-61	significant	tribbles pseudokinase 1
ENSG00000263050		3.79739	0.0312622	4.03046	1.19018e-06	significant
ENSG00000142178	SIK1	3.75615	0.0205738	4.49568	0.0337119	significant	salt inducible kinase 1
ENSG00000256448		3.72284	0.00214049	3.13922	0.00960458	significant
ENSG00000144655	CSRNP1	3.58255	1.93793e-19	3.6272	2.86315e-46	significant	cysteine and serine rich nuclear protein 1
ENSG00000132510	KDM6B	3.54711	2.18915e-14	3.12783	2.17882e-12	significant	lysine demethylase 6B
ENSG00000137193	PIM1	3.4729	3.78895e-16	3.02707	7.95676e-22	significant	Pim-1 proto-oncogene, serine/threonine kinase
ENSG00000095752	IL11	3.40796	2.2741e-05	4.05185	1.86788e-13	significant	interleukin 11
ENSG00000275993	SIK1B	3.37086	0.00297962	2.70942	5.78384e-05	significant	salt inducible kinase 1B (putative)
ENSG00000155090	KLF10	3.36985	5.17269e-36	3.58939	6.12565e-74	significant	Kruppel like factor 10
ENSG00000163874	ZC3H12A	3.34196	6.28923e-15	3.37048	1.40384e-22	significant	zinc finger CCCH-type containing 12A
ENSG00000272273	IER3-AS1	3.3319	3.61165e-14	2.71549	1.37801e-10	significant	IER3 antisense RNA 1
ENSG00000099860	GADD45B	3.31138	4.0113e-53	2.95428	1.12709e-33	significant	growth arrest and DNA damage inducible beta
ENSG00000223749	MIR503HG	3.25955	7.02105e-05	4.83884	4.04538e-29	significant	MIR503 host gene
ENSG00000249669		3.24173	4.77065e-14	2.55108	1.98753e-06	significant
ENSG00000113070	HBEGF	3.22787	7.73742e-12	3.51422	1.44403e-07	significant	heparin binding EGF like growth factor
ENSG00000120738	EGR1	3.16638	1.41348e-05	3.28297	7.91215e-08	significant	early growth response 1
ENSG00000143333	RGS16	3.09895	0.00268719	1.69771	0.0563739	not_significant	regulator of G protein signaling 16
ENSG00000228495	LINC01013	3.08741	0.000721679	2.49021	0.00192662	significant	long intergenic non-protein coding RNA 1013
ENSG00000254884		2.98702	0.000765512	2.83166	0.00631323	significant
ENSG00000174343	CHRNA9	2.97663	0.00483702	1.58193	0.999865	not_significant	cholinergic receptor nicotinic alpha 9 subunit
ENSG00000281207	SLFNL1-AS1	2.93124	1.64165e-10	3.6601	2.50387e-23	significant	SLFNL1 antisense RNA 1
ENSG00000115844	DLX2	2.926	2.89325e-08	2.81929	2.19752e-23	significant	distal-less homeobox 2
ENSG00000175505	CLCF1	2.83957	5.23796e-17	2.43491	2.16018e-32	significant	cardiotrophin like cytokine factor 1
ENSG00000128016	ZFP36	2.83314	2.36866e-34	2.64355	3.57872e-10	significant	ZFP36 ring finger protein
ENSG00000078401	EDN1	2.79191	5.23417e-12	3.90543	1.26969e-26	significant	endothelin 1
ENSG00000189143	CLDN4	2.66261	0.000308299	3.01027	0.000146378	significant	claudin 4
ENSG00000253669		2.66165	1.30316e-10	2.63791	1.1299e-20	significant
ENSG00000167772	ANGPTL4	2.66154	2.10632e-07	2.89303	5.39695e-28	significant	angiopoietin like 4
ENSG00000254510		2.65986	0.000195203	2.52984	6.08407e-06	significant
ENSG00000227619		2.63295	0.00300001	2.9735	1.51603e-05	significant
ENSG00000224959		2.5689	4.6564e-06	2.09806	3.91892e-07	significant
ENSG00000101665	SMAD7	2.56513	1.43508e-20	2.44639	5.88876e-20	significant	SMAD family member 7
ENSG00000267598		2.55736	1.16301e-13	2.74781	1.2624e-17	significant
ENSG00000120129	DUSP1	2.52432	7.40633e-18	2.6051	2.50387e-23	significant	dual specificity phosphatase 1
ENSG00000267519		2.46198	3.59182e-24	2.60909	3.56217e-43	significant
ENSG00000184557	SOCS3	2.41246	7.01044e-18	1.77492	1.10217e-05	significant	suppressor of cytokine signaling 3
ENSG00000117479	SLC19A2	2.3938	4.67019e-22	2.40653	8.6421e-24	significant	solute carrier family 19 member 2
ENSG00000160888	IER2	2.38768	2.28685e-45	2.54503	4.58729e-35	significant	immediate early response 2
ENSG00000136603	SKIL	2.37357	1.3514e-05	2.28401	7.59306e-14	significant	SKI like proto-oncogene
ENSG00000112715	VEGFA	2.35684	2.57758e-07	2.54639	8.23335e-18	significant	vascular endothelial growth factor A
ENSG00000119508	NR4A3	2.31602	0.0321542	1.81918	0.0102638	significant	nuclear receptor subfamily 4 group A member 3
ENSG00000163545	NUAK2	2.31429	3.04054e-13	2.65736	1.3513e-45	significant	NUAK family kinase 2
ENSG00000237892		2.25536	0.0239303	1.96883	0.0013171	significant
ENSG00000118523	CCN2	2.25381	2.72112e-19	2.25883	2.48118e-12	significant	cellular communication network factor 2
ENSG00000255176		2.19821	1.17461e-05	2.55717	1.72902e-20	significant
ENSG00000165617	DACT1	2.18821	3.315e-09	2.32924	8.34957e-11	significant	dishevelled binding antagonist of beta catenin 1
ENSG00000213859	KCTD11	2.15169	1.00643e-06	2.05999	1.0405e-07	significant	potassium channel tetramerization domain containing 11
ENSG00000168621	GDNF	2.13323	2.60394e-07	1.65591	0.00117539	significant	glial cell derived neurotrophic factor
ENSG00000069399	BCL3	2.12783	4.13763e-12	1.70923	1.53413e-08	significant	BCL3 transcription coactivator
ENSG00000197461	PDGFA	2.09836	0.00376283	2.65091	5.12816e-05	significant	platelet derived growth factor subunit A
ENSG00000279283		2.0803	0.0291918	2.39809	2.1227e-05	significant
ENSG00000186480	INSIG1	2.05566	0.0127898	1.82726	5.72669e-06	significant	insulin induced gene 1
ENSG00000151014	NOCT	2.05136	1.88803e-11	2.1614	3.78617e-31	significant	nocturnin
ENSG00000118515	SGK1	2.05027	1.06879e-24	1.11421	0.000243175	significant	serum/glucocorticoid regulated kinase 1
ENSG00000167470	MIDN	2.02231	1.63575e-06	1.84027	6.46613e-11	significant	midnolin
ENSG00000156427	FGF18	2.01515	0.0247488	0.574256	0.999865	not_significant	fibroblast growth factor 18
ENSG00000143878	RHOB	2.01433	4.3295e-08	2.05609	5.48395e-12	significant	ras homolog family member B
ENSG00000124225	PMEPA1	2.00342	0.000354542	2.42457	3.24956e-08	significant	prostate transmembrane protein, androgen induced 1
ENSG00000279821		1.99944	0.00438847	2.57312	2.06532e-14	significant
ENSG00000183696	UPP1	1.99743	4.09624e-08	1.05821	0.00144476	significant	uridine phosphorylase 1
ENSG00000239948		1.96318	0.010997	3.67196	0.00159179	significant
ENSG00000179094	PER1	1.95551	0.00766846	1.77813	0.000351523	significant	period circadian regulator 1
ENSG00000169991	IFFO2	1.9389	2.31228e-06	2.2774	9.59542e-11	significant	intermediate filament family orphan 2
ENSG00000197019	SERTAD1	1.92781	5.30667e-12	2.24578	3.99013e-31	significant	SERTA domain containing 1
ENSG00000227220		1.92582	2.10632e-07	2.4931	7.56824e-09	significant
ENSG00000164683	HEY1	1.91132	0.0267861	2.02859	0.0221781	significant	hes related family bHLH transcription factor with YRPW motif 1
ENSG00000131759	RARA	1.89788	5.51496e-05	1.99408	1.06058e-08	significant	retinoic acid receptor alpha
ENSG00000260428	SCX	1.89599	8.03293e-05	1.12629	0.260508	not_significant	scleraxis bHLH transcription factor
ENSG00000073756	PTGS2	1.84085	5.35896e-05	1.59786	0.0653121	not_significant	prostaglandin-endoperoxide synthase 2
ENSG00000111859	NEDD9	1.83013	4.28331e-06	1.36951	0.0272286	significant	neural precursor cell expressed, developmentally down-regulated 9
ENSG00000132326	PER2	1.80422	0.000106015	1.86114	0.00200141	significant	period circadian regulator 2
ENSG00000117525	F3	1.78307	1.2886e-10	2.20216	2.29819e-05	significant	coagulation factor III, tissue factor
ENSG00000161642	ZNF385A	1.76233	1.80034e-32	1.64832	8.40542e-09	significant	zinc finger protein 385A
ENSG00000272159		1.75771	0.00442146	1.76422	0.000106733	significant
ENSG00000173846	PLK3	1.74803	7.77217e-07	1.91511	1.56549e-16	significant	polo like kinase 3
ENSG00000136997	MYC	1.73022	6.54362e-10	2.59671	6.34448e-29	significant	MYC proto-oncogene, bHLH transcription factor
ENSG00000143367	TUFT1	1.72372	6.50776e-05	2.1257	3.24956e-08	significant	tuftelin 1
ENSG00000163659	TIPARP	1.711	1.11159e-09	2.49266	2.1271e-13	significant	TCDD inducible poly(ADP-ribose) polymerase
ENSG00000173848	NET1	1.70592	0.000297699	1.22395	0.00649002	significant	neuroepithelial cell transforming 1
ENSG00000156030	ELMSAN1	1.70502	3.6205e-08	1.99067	2.43905e-20	significant	ELM2 and Myb/SANT domain containing 1
ENSG00000054967	RELT	1.69336	6.02527e-08	1.82934	2.41241e-07	significant	RELT TNF receptor
ENSG00000118263	KLF7	1.69334	1.86876e-10	1.69648	5.38213e-09	significant	Kruppel like factor 7
ENSG00000198142	SOWAHC	1.68868	3.70464e-08	1.56567	2.56754e-13	significant	sosondowah ankyrin repeat domain family member C
ENSG00000070495	JMJD6	1.67853	7.26246e-14	1.89589	9.03018e-31	significant	jumonji domain containing 6, arginine demethylase and lysine hydroxylase
ENSG00000177374	HIC1	1.66396	0.000229526	1.56485	2.52056e-08	significant	HIC ZBTB transcriptional repressor 1
ENSG00000185338	SOCS1	1.65831	0.0162014	0.942188	0.398898	not_significant	suppressor of cytokine signaling 1
ENSG00000168994	PXDC1	1.65479	3.64105e-06	1.78855	7.19026e-12	significant	PX domain containing 1
ENSG00000164949	GEM	1.65397	0.015421	1.93676	1.40356e-05	significant	GTP binding protein overexpressed in skeletal muscle
ENSG00000261490		1.65374	4.6569e-10	1.81764	4.40616e-06	significant
ENSG00000138166	DUSP5	1.6526	1.53555e-05	2.24765	1.54929e-23	significant	dual specificity phosphatase 5
ENSG00000124216	SNAI1	1.63549	0.0218625	1.84952	4.28055e-05	significant	snail family transcriptional repressor 1
ENSG00000119737	GPR75	1.61151	0.00171092	2.0708	3.54259e-06	significant	G protein-coupled receptor 75
ENSG00000127528	KLF2	1.56009	3.01054e-07	1.8906	7.71531e-06	significant	Kruppel like factor 2
ENSG00000106366	SERPINE1	1.51099	9.5165e-05	2.18472	6.42146e-06	significant	serpin family E member 1
ENSG00000116285	ERRFI1	1.47149	0.000320139	1.31639	0.00320981	significant	ERBB receptor feedback inhibitor 1
ENSG00000175592	FOSL1	1.456	4.85622e-05	1.69964	0.000689983	significant	FOS like 1, AP-1 transcription factor subunit
ENSG00000184226	PCDH9	1.41389	0.00540802	-0.185838	0.999865	not_significant	protocadherin 9
ENSG00000280143		1.41308	0.0177529	1.06857	0.0644591	not_significant
ENSG00000143384	MCL1	1.39983	6.17749e-19	1.42635	1.39104e-36	significant	MCL1 apoptosis regulator, BCL2 family member
ENSG00000158615	PPP1R15B	1.38873	1.39067e-09	1.7322	1.57868e-32	significant	protein phosphatase 1 regulatory subunit 15B
ENSG00000173276	ZBTB21	1.38682	1.19233e-10	1.37941	4.4337e-13	significant	zinc finger and BTB domain containing 21
ENSG00000170525	PFKFB3	1.37581	8.32321e-06	1.43143	1.00504e-05	significant	6-phosphofructo-2-kinase/fructose-2,6-biphosphatase 3
ENSG00000142871	CCN1	1.37469	3.14127e-22	1.51813	1.71568e-18	significant	cellular communication network factor 1
ENSG00000135111	TBX3	1.36112	4.6564e-06	0.850247	0.00317056	significant	T-box 3
ENSG00000188522	FAM83G	1.35497	0.015647	1.8263	0.000437057	significant	family with sequence similarity 83 member G
ENSG00000148339	SLC25A25	1.35107	1.42698e-09	1.3498	1.91159e-13	significant	solute carrier family 25 member 25
ENSG00000259426	LOC145694	1.30616	0.00046367	1.7218	0.00235412	significant	uncharacterized LOC145694
ENSG00000145632	PLK2	1.30368	1.07524e-05	1.13356	0.0384165	significant	polo like kinase 2
ENSG00000222009	BTBD19	1.30189	0.000204126	1.44572	2.01578e-06	significant	BTB domain containing 19
ENSG00000166471	TMEM41B	1.2976	0.000319727	1.46809	2.09816e-10	significant	transmembrane protein 41B
ENSG00000162413	KLHL21	1.29731	2.347e-13	1.58549	4.16374e-18	significant	kelch like family member 21
ENSG00000136826	KLF4	1.29201	1.17254e-05	1.91694	1.61849e-12	significant	Kruppel like factor 4
ENSG00000162702	ZNF281	1.29092	8.10815e-06	1.52506	1.10087e-30	significant	zinc finger protein 281
ENSG00000112658	SRF	1.29016	1.49675e-06	1.37657	4.53677e-14	significant	serum response factor
ENSG00000116717	GADD45A	1.28589	5.02784e-07	1.42376	6.62371e-08	significant	growth arrest and DNA damage inducible alpha
ENSG00000119669	IRF2BPL	1.27871	1.64489e-05	1.78627	2.28391e-15	significant	interferon regulatory factor 2 binding protein like
ENSG00000261408	TEN1-CDK3	1.27449	0.0246152	1.85359	0.00117539	significant	TEN1-CDK3 readthrough (NMD candidate)
ENSG00000148841	ITPRIP	1.27155	1.22192e-05	1.47552	6.18953e-07	significant	inositol 1,4,5-trisphosphate receptor interacting protein
ENSG00000279227		1.26813	0.00737242	1.43394	0.0152797	significant
ENSG00000198355	PIM3	1.22017	2.12649e-05	1.15946	5.62768e-07	significant	Pim-3 proto-oncogene, serine/threonine kinase
ENSG00000106799	TGFBR1	1.21912	0.00669156	1.48796	2.57343e-08	significant	transforming growth factor beta receptor 1
ENSG00000157514	TSC22D3	1.21063	0.0165946	1.54754	0.0152545	significant	TSC22 domain family member 3
ENSG00000176692	FOXC2	1.20746	0.0112542	1.7372	0.00159179	significant	forkhead box C2
ENSG00000239218		1.19227	0.00793575	1.22513	0.12975	not_significant
ENSG00000187678	SPRY4	1.18232	0.0272357	1.67768	7.24877e-08	significant	sprouty RTK signaling antagonist 4
ENSG00000176749	CDK5R1	1.15669	2.47051e-05	1.26255	0.00920168	significant	cyclin dependent kinase 5 regulatory subunit 1
ENSG00000167565	SERTAD3	1.15344	0.00114649	1.51842	3.01355e-13	significant	SERTA domain containing 3
ENSG00000183337	BCOR	1.14304	0.0231077	1.87353	0.00062872	significant	BCL6 corepressor
ENSG00000100906	NFKBIA	1.11962	0.00557936	0.889953	3.66403e-06	significant	NFKB inhibitor alpha
ENSG00000178860	MSC	1.11336	0.0161623	0.562259	0.0733737	not_significant	musculin
ENSG00000228830		1.11296	0.0458219	1.20739	0.144107	not_significant
ENSG00000167173	C15orf39	1.11105	5.03111e-06	1.245	1.45186e-07	significant	chromosome 15 open reading frame 39
ENSG00000185947	ZNF267	1.11088	0.00317674	0.737451	0.0335898	significant	zinc finger protein 267
ENSG00000253837	LOC100507156	1.10572	0.000264046	0.699564	0.262357	not_significant	uncharacterized LOC100507156
ENSG00000087494	PTHLH	1.10548	0.0141764	0.198603	0.999865	not_significant	parathyroid hormone like hormone
ENSG00000126603	GLIS2	1.09529	0.00553836	1.31661	0.00958875	significant	GLIS family zinc finger 2
ENSG00000256671	LIMS4	1.09224	0.0210211	1.52726	0.0224055	significant	LIM zinc finger domain containing 4
ENSG00000196843	ARID5A	1.08423	8.99232e-06	0.941459	0.000952726	significant	AT-rich interaction domain 5A
ENSG00000188215	DCUN1D3	1.08157	3.50203e-06	1.28434	6.47684e-13	significant	defective in cullin neddylation 1 domain containing 3
ENSG00000132003	ZSWIM4	1.07856	0.00506422	1.5214	0.00793513	significant	zinc finger SWIM-type containing 4
ENSG00000177426	TGIF1	1.06636	2.29999e-05	1.44898	5.42615e-07	significant	TGFB induced factor homeobox 1
ENSG00000230630		1.0642	2.49779e-08	1.57374	8.25594e-05	significant
ENSG00000162783	IER5	1.05247	2.83176e-17	1.27572	2.02074e-24	significant	immediate early response 5
ENSG00000185022	MAFF	1.05111	0.00939633	1.04406	7.64006e-10	significant	MAF bZIP transcription factor F
ENSG00000177606	JUN	1.03795	0.0329475	2.01605	3.91892e-07	significant	Jun proto-oncogene, AP-1 transcription factor subunit
ENSG00000140406	TLNRD1	1.03662	5.52587e-08	0.946034	0.00136153	significant	talin rod domain containing 1
ENSG00000185650	ZFP36L1	1.02952	6.50776e-05	1.22511	1.64134e-05	significant	ZFP36 ring finger protein like 1
ENSG00000197183	NOL4L	1.02285	0.0113103	0.871551	0.0136726	significant	nucleolar protein 4 like
ENSG00000159200	RCAN1	1.0204	0.021847	0.696243	0.0524639	not_significant	regulator of calcineurin 1
ENSG00000203804	ADAMTSL4-AS1	1.00811	0.0163111	1.57265	0.0539061	not_significant	ADAMTSL4 antisense RNA 1
ENSG00000131652	THOC6	0.979371	1.21799e-11	0.981544	2.71108e-05	significant	THO complex 6
ENSG00000134954	ETS1	0.96477	7.9683e-09	0.922064	6.8801e-06	significant	ETS proto-oncogene 1, transcription factor
ENSG00000198517	MAFK	0.942696	0.00340732	1.17799	5.77587e-05	significant	MAF bZIP transcription factor K
ENSG00000143322	ABL2	0.941516	4.51007e-05	0.978085	0.000850202	significant	ABL proto-oncogene 2, non-receptor tyrosine kinase
ENSG00000137124	ALDH1B1	0.933832	0.0120109	0.799547	0.00941185	significant	aldehyde dehydrogenase 1 family member B1
ENSG00000143067	ZNF697	0.918946	0.0111151	1.22737	1.08721e-07	significant	zinc finger protein 697
ENSG00000169018	FEM1B	0.905483	0.000664656	0.927616	1.44178e-15	significant	fem-1 homolog B
ENSG00000107968	MAP3K8	0.899944	0.0360399	0.305217	0.999865	not_significant	mitogen-activated protein kinase kinase kinase 8
ENSG00000244165	P2RY11	0.879684	0.00465617	0.806077	0.0326256	significant	purinergic receptor P2Y11
ENSG00000134668	SPOCD1	0.873035	0.0130681	1.05466	0.00753595	significant	SPOC domain containing 1
ENSG00000154642	C21orf91	0.872932	0.000806631	0.683184	0.00159179	significant	chromosome 21 open reading frame 91
ENSG00000184635	ZNF93	0.872469	0.000806631	0.752055	0.784289	not_significant	zinc finger protein 93
ENSG00000273038		0.8719	2.84458e-07	0.503381	0.401906	not_significant
ENSG00000170681	CAVIN4	0.865406	0.0481389	0.979157	0.00820741	significant	caveolae associated protein 4
ENSG00000166483	WEE1	0.861724	0.00540802	0.543106	0.946702	not_significant	WEE1 G2 checkpoint kinase
ENSG00000140332	TLE3	0.857564	0.000476028	0.899225	0.0034125	significant	TLE family member 3, transcriptional corepressor
ENSG00000179361	ARID3B	0.856511	0.0256316	0.764106	0.050156	not_significant	AT-rich interaction domain 3B
ENSG00000163660	CCNL1	0.854658	1.88506e-11	0.794047	0.00435002	significant	cyclin L1
ENSG00000134259	NGF	0.854496	0.000297699	1.15205	0.0989769	not_significant	nerve growth factor
ENSG00000008513	ST3GAL1	0.852056	0.0383668	0.964277	0.00964859	significant	ST3 beta-galactoside alpha-2,3-sialyltransferase 1
ENSG00000130766	SESN2	0.850903	0.0124502	1.22084	0.000818589	significant	sestrin 2
ENSG00000137449	CPEB2	0.848088	0.0212595	1.27854	0.0111941	significant	cytoplasmic polyadenylation element binding protein 2
ENSG00000169594	BNC1	0.846846	0.0387393	1.09716	0.0778834	not_significant	basonuclin 1
ENSG00000122644	ARL4A	0.839916	0.000346168	1.00347	0.0973236	not_significant	ADP ribosylation factor like GTPase 4A
ENSG00000070444	MNT	0.839132	0.0165946	1.15134	0.00568177	significant	MAX network transcriptional repressor
ENSG00000168264	IRF2BP2	0.831553	2.68318e-05	1.02859	6.49694e-07	significant	interferon regulatory factor 2 binding protein 2
ENSG00000147883	CDKN2B	0.815804	4.79771e-05	0.769215	0.0973236	not_significant	cyclin dependent kinase inhibitor 2B
ENSG00000182378	PLCXD1	0.810555	0.0256316	0.412044	0.999865	not_significant	phosphatidylinositol specific phospholipase C X domain containing 1
ENSG00000138835	RGS3	0.807379	0.000687545	0.73902	0.0100535	significant	regulator of G protein signaling 3
ENSG00000168386	FILIP1L	0.805799	0.000974327	0.511256	0.238489	not_significant	filamin A interacting protein 1 like
ENSG00000114019	AMOTL2	0.795563	0.0103611	1.08914	3.10979e-06	significant	angiomotin like 2
ENSG00000130522	JUND	0.788754	0.0027906	0.809679	0.0109511	significant	JunD proto-oncogene, AP-1 transcription factor subunit
ENSG00000062716	VMP1	0.770152	9.29545e-05	0.309472	0.93473	not_significant	vacuole membrane protein 1
ENSG00000132002	DNAJB1	0.769948	5.4585e-12	0.807817	6.18953e-07	significant	DnaJ heat shock protein family (Hsp40) member B1
ENSG00000156273	BACH1	0.7625	3.48877e-07	0.572728	0.0906939	not_significant	BTB domain and CNC homolog 1
ENSG00000170852	KBTBD2	0.754471	0.000806631	0.666754	0.0169293	significant	kelch repeat and BTB domain containing 2
ENSG00000103449	SALL1	0.748786	1.88506e-11	0.811176	0.00464004	significant	spalt like transcription factor 1
ENSG00000143514	TP53BP2	0.7478	3.01054e-07	0.688066	0.000387072	significant	tumor protein p53 binding protein 2
ENSG00000149798	CDC42EP2	0.741452	0.0130341	1.07293	0.000210297	significant	CDC42 effector protein 2
ENSG00000125812	GZF1	0.740877	0.0015053	1.13558	4.75559e-12	significant	GDNF inducible zinc finger protein 1
ENSG00000078804	TP53INP2	0.734313	0.00742235	0.772519	0.0406283	significant	tumor protein p53 inducible nuclear protein 2
ENSG00000230844	ZNF674-AS1	0.73105	0.0440046	0.860815	0.0912184	not_significant	ZNF674 antisense RNA 1 (head to head)
ENSG00000186594	MIR22HG	0.720487	0.0163349	0.897704	0.00136153	significant	MIR22 host gene
ENSG00000196182	STK40	0.717693	0.00315224	0.768694	0.000444868	significant	serine/threonine kinase 40
ENSG00000125347	IRF1	0.716986	0.000308299	0.732912	0.159665	not_significant	interferon regulatory factor 1
ENSG00000142867	BCL10	0.713356	0.00379816	0.610925	0.00615119	significant	BCL10 immune signaling adaptor
ENSG00000179820	MYADM	0.711328	0.00138698	0.548957	0.0628113	not_significant	myeloid associated differentiation marker
ENSG00000196449	YRDC	0.691464	0.0325719	0.847892	0.00932919	significant	yrdC N6-threonylcarbamoyltransferase domain containing
ENSG00000087074	PPP1R15A	0.691121	0.0191681	0.714613	1.97467e-08	significant	protein phosphatase 1 regulatory subunit 15A
ENSG00000124762	CDKN1A	0.686987	0.0315798	1.04892	0.00107866	significant	cyclin dependent kinase inhibitor 1A
ENSG00000131873	CHSY1	0.674661	0.0329475	0.792206	0.00212611	significant	chondroitin sulfate synthase 1
ENSG00000188785	ZNF548	0.669095	0.0101196	1.11847	8.39414e-05	significant	zinc finger protein 548
ENSG00000113742	CPEB4	0.657946	0.0238541	0.648467	4.35005e-06	significant	cytoplasmic polyadenylation element binding protein 4
ENSG00000170802	FOXN2	0.650715	0.00338995	0.532694	0.203857	not_significant	forkhead box N2
ENSG00000251493	FOXD1	0.649338	0.00420097	0.923151	0.0105174	significant	forkhead box D1
ENSG00000164933	SLC25A32	0.648932	7.02105e-05	0.518065	0.133579	not_significant	solute carrier family 25 member 32
ENSG00000164741	DLC1	0.627945	0.0218198	0.693016	0.00660419	significant	DLC1 Rho GTPase activating protein
ENSG00000096717	SIRT1	0.627137	0.00414076	0.61518	0.0232101	significant	sirtuin 1
ENSG00000170836	PPM1D	0.626696	0.0033295	0.564199	0.0103801	significant	protein phosphatase, Mg2+/Mn2+ dependent 1D
ENSG00000162775	RBM15	0.622014	0.00686503	0.648903	0.0795871	not_significant	RNA binding motif protein 15
ENSG00000174010	KLHL15	0.621009	0.00643176	0.632855	0.00149574	significant	kelch like family member 15
ENSG00000123395	ATG101	0.605838	0.0182403	0.528769	0.0973236	not_significant	autophagy related 101
ENSG00000163961	RNF168	0.598369	0.000106015	0.995154	7.85179e-05	significant	ring finger protein 168
ENSG00000178607	ERN1	0.596339	0.0491002	0.746868	0.010374	significant	endoplasmic reticulum to nucleus signaling 1
ENSG00000019144	PHLDB1	0.594672	0.0109118	0.865548	4.11696e-06	significant	pleckstrin homology like domain family B member 1
ENSG00000102034	ELF4	0.587178	0.0325719	0.801605	0.000788802	significant	E74 like ETS transcription factor 4
ENSG00000139372	TDG	0.582902	0.0102033	0.774517	0.00326427	significant	thymine DNA glycosylase
ENSG00000222041	CYTOR	0.580971	0.00420097	0.333787	0.527181	not_significant	cytoskeleton regulator RNA
ENSG00000135679	MDM2	0.578813	0.000353541	0.552126	0.149142	not_significant	MDM2 proto-oncogene
ENSG00000143479	DYRK3	0.576553	0.0170083	0.969957	2.36938e-09	significant	dual specificity tyrosine phosphorylation regulated kinase 3
ENSG00000161638	ITGA5	0.57429	0.0104327	0.493787	0.226079	not_significant	integrin subunit alpha 5
ENSG00000167487	KLHL26	0.568084	0.0156643	1.10061	0.000495318	significant	kelch like family member 26
ENSG00000143751	SDE2	0.56655	0.00427419	0.786283	2.1981e-05	significant	SDE2 telomere maintenance homolog
ENSG00000163637	PRICKLE2	0.564442	0.0321542	0.626589	0.00415522	significant	prickle planar cell polarity protein 2
ENSG00000181026	AEN	0.559956	4.50838e-07	0.558655	0.00133825	significant	apoptosis enhancing nuclease
ENSG00000163378	EOGT	0.551206	0.0242381	0.493473	0.000712656	significant	EGF domain specific O-linked N-acetylglucosamine transferase
ENSG00000134058	CDK7	0.541881	0.0156004	0.687725	2.16941e-06	significant	cyclin dependent kinase 7
ENSG00000198853	RUSC2	0.53674	0.0308821	0.844884	0.00887604	significant	RUN and SH3 domain containing 2
ENSG00000204569	PPP1R10	0.531953	0.00379816	0.54366	0.295021	not_significant	protein phosphatase 1 regulatory subunit 10
ENSG00000166822	TMEM170A	0.52646	0.0232142	0.324799	0.24503	not_significant	transmembrane protein 170A
ENSG00000144233	AMMECR1L	0.519487	0.0278004	0.643912	0.0152797	significant	AMMECR1 like
ENSG00000258839	MC1R	0.512426	0.000285239	0.34468	0.328619	not_significant	melanocortin 1 receptor
ENSG00000148840	PPRC1	0.502692	0.0347901	0.69079	0.128088	not_significant	PPARG related coactivator 1
ENSG00000116679	IVNS1ABP	0.502682	0.0132704	0.275809	0.999865	not_significant	influenza virus NS1A binding protein
ENSG00000256683	ZNF350	-0.503101	0.0266645	-0.295979	0.829781	not_significant	zinc finger protein 350
ENSG00000236144	TMEM147-AS1	-0.505981	0.038742	-0.874794	0.0038942	significant	TMEM147 antisense RNA 1
ENSG00000088876	ZNF343	-0.513697	0.0101189	-0.38394	0.392727	not_significant	zinc finger protein 343
ENSG00000198799	LRIG2	-0.520901	0.0305158	-0.544019	0.00628813	significant	leucine rich repeats and immunoglobulin like domains 2
ENSG00000182484		-0.525781	0.0481389	-0.43566	0.00380748	significant
ENSG00000204237	OXLD1	-0.551915	0.0155998	-0.578166	0.0240148	significant	oxidoreductase like domain containing 1
ENSG00000089335	ZNF302	-0.555475	0.0129317	-0.484475	0.0817666	not_significant	zinc finger protein 302
ENSG00000167625	ZNF526	-0.557224	0.00165889	-0.693098	0.0112295	significant	zinc finger protein 526
ENSG00000142528	ZNF473	-0.563426	0.0287874	-0.640202	0.275226	not_significant	zinc finger protein 473
ENSG00000197128	ZNF772	-0.565653	0.0146018	-0.604638	0.0277591	significant	zinc finger protein 772
ENSG00000144026	ZNF514	-0.56595	0.000806631	-0.38192	0.284978	not_significant	zinc finger protein 514
ENSG00000135637	CCDC142	-0.571623	0.0264097	-0.451208	0.211348	not_significant	coiled-coil domain containing 142
ENSG00000278970	HEIH	-0.572416	0.000593387	-0.644877	0.0194875	significant	hepatocellular carcinoma up-regulated EZH2-associated long non-coding RNA
ENSG00000223705	NSUN5P1	-0.575774	0.00556123	-0.75386	0.0112531	significant	NSUN5 pseudogene 1
ENSG00000198551	ZNF627	-0.582685	0.0107664	-0.621888	0.0116059	significant	zinc finger protein 627
ENSG00000127989	MTERF1	-0.585322	0.0156955	-0.160009	0.999865	not_significant	mitochondrial transcription termination factor 1
ENSG00000152439	ZNF773	-0.594253	0.0295311	-0.568135	0.0679355	not_significant	zinc finger protein 773
ENSG00000172273	HINFP	-0.597789	2.24669e-05	-0.823025	2.5679e-05	significant	histone H4 transcription factor
ENSG00000244560	LOC155060	-0.597864	0.00902343	-0.537783	0.809537	not_significant	AI894139 pseudogene
ENSG00000198346	ZNF813	-0.609425	0.0350036	-0.375312	0.514824	not_significant	zinc finger protein 813
ENSG00000176700		-0.611351	0.00710475	-0.510855	0.390053	not_significant
ENSG00000116922	C1orf109	-0.611944	0.00214049	-0.441	0.0144541	significant	chromosome 1 open reading frame 109
ENSG00000121406	ZNF549	-0.614405	0.0346161	-0.424253	0.147083	not_significant	zinc finger protein 549
ENSG00000196150	ZNF250	-0.615854	0.0101859	-0.267952	0.999865	not_significant	zinc finger protein 250
ENSG00000124279	FASTKD3	-0.621548	0.0191346	-0.349476	0.784289	not_significant	FAST kinase domains 3
ENSG00000141026	MED9	-0.622112	0.00363231	-0.343775	0.374399	not_significant	mediator complex subunit 9
ENSG00000174353	TRIM74	-0.622129	0.00263689	-0.676477	5.29869e-08	significant	tripartite motif containing 74
ENSG00000267680	ZNF224	-0.62223	0.0170477	-0.597704	0.145183	not_significant	zinc finger protein 224
ENSG00000186812	ZNF397	-0.62699	0.000518199	-0.565373	0.141026	not_significant	zinc finger protein 397
ENSG00000204611	ZNF616	-0.628933	0.0058345	-0.422813	0.706208	not_significant	zinc finger protein 616
ENSG00000131849	ZNF132	-0.637216	0.0236664	-0.663645	0.00968829	significant	zinc finger protein 132
ENSG00000133624	ZNF767P	-0.641011	0.0174141	-0.606346	0.462413	not_significant	zinc finger family member 767, pseudogene
ENSG00000185730	ZNF696	-0.641435	0.0101516	-0.70943	0.0455748	significant	zinc finger protein 696
ENSG00000070718	AP3M2	-0.648678	1.57927e-05	-0.436141	0.264369	not_significant	adaptor related protein complex 3 subunit mu 2
ENSG00000162971	TYW5	-0.663419	0.00200285	-0.741382	0.00304108	significant	tRNA-yW synthesizing protein 5
ENSG00000174365	SNHG11	-0.666471	0.00381389	-0.745778	0.0258513	significant	small nucleolar RNA host gene 11
ENSG00000103199	ZNF500	-0.666818	0.000243019	-0.612686	0.107063	not_significant	zinc finger protein 500
ENSG00000121903	ZSCAN20	-0.67495	0.0404462	-0.274364	0.710379	not_significant	zinc finger and SCAN domain containing 20
ENSG00000104221	BRF2	-0.681663	0.000476028	-0.67961	0.0422743	significant	BRF2 RNA polymerase III transcription initiation factor subunit
ENSG00000223509		-0.684057	0.0101516	-0.448729	0.822125	not_significant
ENSG00000251369	ZNF550	-0.693864	0.0373967	-0.971999	3.85577e-06	significant	zinc finger protein 550
ENSG00000249471	ZNF324B	-0.704422	0.0164413	-0.626859	0.296964	not_significant	zinc finger protein 324B
ENSG00000131127	ZNF141	-0.708706	0.000353541	-0.415587	0.530725	not_significant	zinc finger protein 141
ENSG00000251022	THAP9-AS1	-0.71746	0.0031726	-0.967182	1.79934e-06	significant	THAP9 antisense RNA 1
ENSG00000212694	LINC01089	-0.723406	0.0161809	-1.10049	0.00774897	significant	long intergenic non-protein coding RNA 1089
ENSG00000204623	ZNRD1ASP	-0.72837	0.00194757	-0.648895	0.3241	not_significant	zinc ribbon domain containing 1 antisense, pseudogene
ENSG00000174456	C12orf76	-0.740662	0.0330727	-0.517189	0.906146	not_significant	chromosome 12 open reading frame 76
ENSG00000277072		-0.741089	0.0279086	-0.519048	0.0852711	not_significant
ENSG00000083814	ZNF671	-0.746469	0.0223044	-0.907799	2.8905e-05	significant	zinc finger protein 671
ENSG00000135245	HILPDA	-0.749859	0.00250272	-0.505425	0.254492	not_significant	hypoxia inducible lipid droplet associated
ENSG00000163026	WDCP	-0.757484	0.00943795	-0.520175	0.210851	not_significant	WD repeat and coiled coil containing
ENSG00000176444	CLK2	-0.763084	6.37438e-07	-0.828086	8.59597e-06	significant	CDC like kinase 2
ENSG00000111276	CDKN1B	-0.763735	0.00710475	-0.390445	0.764335	not_significant	cyclin dependent kinase inhibitor 1B
ENSG00000275111	ZNF2	-0.778612	0.00449239	-0.63451	0.105208	not_significant	zinc finger protein 2
ENSG00000185946	RNPC3	-0.805546	0.00666034	-0.704618	0.0105189	significant	RNA binding region (RNP1, RRM) containing 3
ENSG00000124549	BTN2A3P	-0.807002	0.00190582	-0.821057	0.00109411	significant	butyrophilin subfamily 2 member A3, pseudogene
ENSG00000080947	CROCCP3	-0.809607	0.000164538	-0.523643	0.493362	not_significant	CROCC pseudogene 3
ENSG00000280063		-0.81011	0.00160351	-0.883773	0.0102001	significant
ENSG00000111664	GNB3	-0.825941	0.00902343	0.109412	0.999865	not_significant	G protein subunit beta 3
ENSG00000166133	RPUSD2	-0.826589	0.000285384	-0.731028	0.013784	significant	RNA pseudouridine synthase domain containing 2
ENSG00000146556	WASH2P	-0.868637	2.09649e-05	-0.568413	0.0330313	significant	WASP family homolog 2, pseudogene
ENSG00000213865	C8orf44	-0.882019	0.0380961	-0.818022	0.392393	not_significant	chromosome 8 open reading frame 44
ENSG00000185670	ZBTB3	-0.885529	0.00311598	-0.940439	0.000526385	significant	zinc finger and BTB domain containing 3
ENSG00000282458	WASH5P	-0.888075	1.37721e-14	-0.677761	0.00257457	significant	WASP family homolog 5, pseudogene
ENSG00000234072		-0.901094	0.00098021	-0.886384	0.0330115	significant
ENSG00000215908	CROCCP2	-0.917665	1.3273e-05	-0.677202	0.00251846	significant	CROCC pseudogene 2
ENSG00000270882	HIST2H4A	-0.919055	0.0358329	-0.273328	0.999865	not_significant	histone cluster 2 H4 family member a
ENSG00000249709	ZNF564	-0.951663	0.00384059	-0.972259	0.275623	not_significant	zinc finger protein 564
ENSG00000187566	NHLRC1	-0.953078	0.020455	-0.67996	0.150317	not_significant	NHL repeat containing E3 ubiquitin protein ligase 1
ENSG00000186300	ZNF555	-0.967335	0.0278101	-1.12314	8.25594e-05	significant	zinc finger protein 555
ENSG00000223547	ZNF844	-0.971141	5.93384e-05	-0.938849	0.0793735	not_significant	zinc finger protein 844
ENSG00000196724	ZNF418	-1.02781	9.0092e-05	-0.991249	0.000756777	significant	zinc finger protein 418
ENSG00000105136	ZNF419	-1.03638	0.00414275	-0.969679	0.00611118	significant	zinc finger protein 419
ENSG00000157429	ZNF19	-1.051	0.0140225	-1.1535	0.00969103	significant	zinc finger protein 19
ENSG00000158691	ZSCAN12	-1.07173	1.8841e-05	-0.945151	2.75791e-06	significant	zinc finger and SCAN domain containing 12
ENSG00000260597		-1.07492	0.00275532	-0.235932	0.999865	not_significant
ENSG00000251474	RPL32P3	-1.08437	1.22495e-06	-0.785051	0.00110996	significant	ribosomal protein L32 pseudogene 3
ENSG00000243406	MRPS31P5	-1.10603	0.00123815	-1.48362	6.14153e-07	significant	mitochondrial ribosomal protein S31 pseudogene 5
ENSG00000187626	ZKSCAN4	-1.29475	0.00633971	-1.20744	2.8014e-07	significant	zinc finger with KRAB and SCAN domains 4
ENSG00000249087	ZNF436-AS1	-1.45386	0.00502386	-1.5197	0.0192156	significant	ZNF436 antisense RNA 1
ENSG00000269609	RPARP-AS1	-1.60516	0.00170581	-1.14249	0.0527884	not_significant	RPARP antisense RNA 1

## Sheet: L32V vs Ctrl 8 h TGF-β
Full list of genes differentially regulated by TGF-b in the Control Fibroblasts versus L32V fibroblasts after 8 hrs
Genes are significantly differentially expressed in the control cell line with an absolute log2 fold change of at least 0.5 and detected with at least 2 TPM in the control cell lines.
Genes highlighted in red are the not significant in L32V fibroblasts and they have been shown by the heatmaps and box plots in Figure 7. Genes in bold were validated by qPCR (Supplementary Figure 7)
		Control fibroblasts 8 hrs vs 0		L32V fibroblasts 8 hrs vs 0
Ensembl Gene ID	Symbol	Normalized log2Fold Change	padj.	Normalized log2Fold Change	padj	significant in L32V	Gene Name
ENSG00000174792	ODAPH	9.69108	1.88213e-47	4.68687	0.000334006	significant	odontogenesis associated phosphoprotein
ENSG00000254275		9.2793	1.43531e-14	6.42031	7.46588e-07	significant
ENSG00000169427	KCNK9	9.07192	1.1789e-12	6.20923	8.63007e-07	significant	potassium two pore domain channel subfamily K member 9
ENSG00000167178	ISLR2	8.39925	1.09032e-17	5.12086	6.66132e-12	significant	immunoglobulin superfamily containing leucine rich repeat 2
ENSG00000159261	CLDN14	8.2151	2.53338e-09	7.49487	3.85918e-14	significant	claudin 14
ENSG00000187180	LCE2C	7.62523	1.42758e-07	6.72435	6.65044e-06	significant	late cornified envelope 2C
ENSG00000235636		7.43976	1.19242e-07	1.48734	0.00640093	significant
ENSG00000238042	LINC02257	7.31266	4.75671e-11	3.55425	0.00633481	significant	long intergenic non-protein coding RNA 2257
ENSG00000163202	LCE3D	7.16183	1.80307e-07	5.39032	2.92853e-12	significant	late cornified envelope 3D
ENSG00000095752	IL11	7.1349	4.63271e-26	6.97477	2.23907e-21	significant	interleukin 11
ENSG00000250038		7.10325	4.70189e-09	4.61909	0.000243201	significant
ENSG00000230479		7.00316	6.65275e-09	4.00217	6.75049e-08	significant
ENSG00000172137	CALB2	6.99559	1.85185e-55	5.27193	1.45843e-28	significant	calbindin 2
ENSG00000174343	CHRNA9	6.99531	3.56713e-21	4.88187	2.32766e-13	significant	cholinergic receptor nicotinic alpha 9 subunit
ENSG00000170054	SERPINA9	6.83264	8.38565e-12	4.72507	0.000273474	significant	serpin family A member 9
ENSG00000132854	KANK4	6.80186	2.35646e-12	6.12485	5.97376e-09	significant	KN motif and ankyrin repeat domains 4
ENSG00000137868	STRA6	6.66933	4.28768e-28	6.09269	2.55673e-18	significant	stimulated by retinoic acid 6
ENSG00000167874	TMEM88	6.37185	3.54189e-19	4.8296	1.67487e-11	significant	transmembrane protein 88
ENSG00000227925	LINC01655	6.23227	2.9053e-07	5.82694	0.00031586	significant	long intergenic non-protein coding RNA 1655
ENSG00000125845	BMP2	6.16999	2.94826e-14	2.85138	5.22717e-05	significant	bone morphogenetic protein 2
ENSG00000124225	PMEPA1	6.14986	1.08928e-43	5.22831	3.1701e-13	significant	prostate transmembrane protein, androgen induced 1
ENSG00000240386	LCE1F	6.14107	1.9235e-07	5.35114	2.1471e-06	significant	late cornified envelope 1F
ENSG00000223749	MIR503HG	6.09427	3.46181e-19	5.03511	1.78767e-10	significant	MIR503 host gene
ENSG00000134198	TSPAN2	6.03726	2.66631e-48	5.63047	3.35021e-28	significant	tetraspanin 2
ENSG00000183780	SLC35F3	5.89134	5.02377e-30	5.89877	4.20737e-09	significant	solute carrier family 35 member F3
ENSG00000156466	GDF6	5.82369	6.7725e-08	4.81847	3.91423e-08	significant	growth differentiation factor 6
ENSG00000087494	PTHLH	5.80546	3.87642e-87	5.27455	1.23535e-50	significant	parathyroid hormone like hormone
ENSG00000144476	ACKR3	5.7771	5.94152e-05	4.51838	4.2506e-17	significant	atypical chemokine receptor 3
ENSG00000136689	IL1RN	5.75289	5.16787e-08	5.53881	1.07019e-24	significant	interleukin 1 receptor antagonist
ENSG00000100867	DHRS2	5.75119	4.99773e-13	4.23696	2.5771e-27	significant	dehydrogenase/reductase 2
ENSG00000105509	HAS1	5.72845	8.17213e-20	8.18002	2.32162e-09	significant	hyaluronan synthase 1
ENSG00000137033	IL33	5.69886	1.57407e-05	5.33889	5.92305e-05	significant	interleukin 33
ENSG00000169508	GPR183	5.59055	1.02613e-11	4.59863	3.47384e-05	significant	G protein-coupled receptor 183
ENSG00000197084	LCE1C	5.46139	0.000291802	3.9335		not_significant	late cornified envelope 1C
ENSG00000189143	CLDN4	5.42904	1.88974e-20	5.00335	9.72379e-22	significant	claudin 4
ENSG00000086991	NOX4	5.36338	1.39754e-23	4.56022	2.44653e-12	significant	NADPH oxidase 4
ENSG00000122877	EGR2	5.34742	4.45772e-13	3.47807	5.21822e-13	significant	early growth response 2
ENSG00000105989	WNT2	5.25614	1.67695e-20	3.94472	5.66729e-34	significant	Wnt family member 2
ENSG00000227619		5.12028	1.74177e-14	4.77121	7.40228e-09	significant
ENSG00000163207	IVL	5.11459	3.51783e-06	5.68337	7.33107e-05	significant	involucrin
ENSG00000248187		5.09594	6.60807e-23	3.90452	1.25081e-20	significant
ENSG00000115221	ITGB6	5.0937	2.9066e-29	4.61694	3.18904e-08	significant	integrin subunit beta 6
ENSG00000124466	LYPD3	5.06785	2.23816e-15	5.26593	1.33328e-17	significant	LY6/PLAUR domain containing 3
ENSG00000101096	NFATC2	5.02472	4.39844e-27	4.27622	1.55565e-20	significant	nuclear factor of activated T cells 2
ENSG00000249379	LOC105375095	5.02229	4.83339e-05	3.87471		not_significant	uncharacterized LOC105375095
ENSG00000223414		5.01751	6.97566e-06	4.16716	0.00519384	significant
ENSG00000071282	LMCD1	4.98631	1.58876e-15	2.82066	7.25903e-18	significant	LIM and cysteine rich domains 1
ENSG00000228495	LINC01013	4.98457	4.60426e-12	3.44094	7.64792e-05	significant	long intergenic non-protein coding RNA 1013
ENSG00000128342	LIF	4.8454	4.27842e-12	5.68239	2.18769e-17	significant	LIF interleukin 6 family cytokine
ENSG00000184226	PCDH9	4.75834	6.18138e-39	4.5602	1.36977e-28	significant	protocadherin 9
ENSG00000170681	CAVIN4	4.71958	8.20533e-78	4.77383	3.41634e-68	significant	caveolae associated protein 4
ENSG00000232358		4.71151	2.86613e-06	3.16463	0.00165715	significant
ENSG00000027869	SH2D2A	4.70916	3.6884e-12	3.85148	7.62917e-14	significant	SH2 domain containing 2A
ENSG00000198729	PPP1R14C	4.66205	3.21476e-15	3.42361	8.28429e-15	significant	protein phosphatase 1 regulatory inhibitor subunit 14C
ENSG00000108688	CCL7	4.62071	0.000194469	5.50636	3.77888e-11	significant	C-C motif chemokine ligand 7
ENSG00000156427	FGF18	4.59873	8.23524e-15	3.56651	7.78476e-06	significant	fibroblast growth factor 18
ENSG00000113578	FGF1	4.58411	2.79367e-37	2.24769	9.00941e-12	significant	fibroblast growth factor 1
ENSG00000132510	KDM6B	4.58204	1.43584e-25	3.41295	6.82719e-15	significant	lysine demethylase 6B
ENSG00000115602	IL1RL1	4.56921	1.80978e-06	2.37348	0.000280287	significant	interleukin 1 receptor like 1
ENSG00000116690	PRG4	4.55273	2.8301e-08	2.34394	0.051266	not_significant	proteoglycan 4
ENSG00000026559	KCNG1	4.54297	4.15277e-61	3.44172	1.59955e-28	significant	potassium voltage-gated channel modifier subfamily G member 1
ENSG00000136244	IL6	4.54211	4.50208e-08	2.68908	4.57658e-08	significant	interleukin 6
ENSG00000133808		4.54075	2.62172e-21	4.36727	1.59223e-26	significant
ENSG00000117479	SLC19A2	4.52476	5.43123e-83	3.71755	1.86111e-39	significant	solute carrier family 19 member 2
ENSG00000275993	SIK1B	4.51935	2.69652e-07	2.84607	0.002166	significant	salt inducible kinase 1B (putative)
ENSG00000131620	ANO1	4.47466	4.39271e-11	1.27437	0.540873	not_significant	anoctamin 1
ENSG00000278998		4.46341	0.000119095	3.07956	3.83146e-08	significant
ENSG00000278709	NKILA	4.45022	2.7192e-26	2.70606	4.0658e-09	significant	NF-kappaB interacting lncRNA
ENSG00000275927		4.44862	0.000185161	5.06099	3.09307e-05	significant
ENSG00000272114		4.44316	1.19645e-12	3.68922	8.9535e-13	significant
ENSG00000144834	TAGLN3	4.43887	8.97733e-07	5.1199	4.79402e-15	significant	transgelin 3
ENSG00000268942	CKS1BP3	4.43617	0.0242907	-0.51102	0.859179	not_significant
ENSG00000122641	INHBA	4.4308	2.28164e-21	4.74047	9.57471e-39	significant	inhibin subunit beta A
ENSG00000142178	SIK1	4.43024	0.000158998	3.25647	0.00122735	significant	salt inducible kinase 1
ENSG00000232679		4.35603	9.22181e-53	3.58793	3.74274e-05	significant
ENSG00000058085	LAMC2	4.35584	1.3085e-17	3.02768	1.33887e-08	significant	laminin subunit gamma 2
ENSG00000164251	F2RL1	4.34295	2.23179e-64	5.02011	5.45148e-54	significant	F2R like trypsin receptor 1
ENSG00000122254	HS3ST2	4.31347	4.9384e-07	4.73352	0.0205597	significant	heparan sulfate-glucosamine 3-sulfotransferase 2
ENSG00000102468	HTR2A	4.2625	1.54763e-13	3.77869	3.102e-11	significant	5-hydroxytryptamine receptor 2A
ENSG00000112715	VEGFA	4.23142	7.04584e-26	3.59134	3.00965e-26	significant	vascular endothelial growth factor A
ENSG00000143333	RGS16	4.18793	1.73069e-07	4.34469	3.59635e-16	significant	regulator of G protein signaling 16
ENSG00000137331	IER3	4.16308	1.81174e-36	3.41279	1.09662e-47	significant	immediate early response 3
ENSG00000106537	TSPAN13	4.16093	3.50096e-74	4.24866	6.69916e-93	significant	tetraspanin 13
ENSG00000251281		4.13973	6.26995e-16	5.18024	5.93718e-11	significant
ENSG00000164935	DCSTAMP	4.07274	6.25659e-06	3.54602	5.90666e-07	significant	dendrocyte expressed seven transmembrane protein
ENSG00000173702	MUC13	3.99241	5.35993e-06	3.2761	0.00188265	significant	mucin 13, cell surface associated
ENSG00000180739	S1PR5	3.92633	3.68236e-10	3.24707	9.2908e-11	significant	sphingosine-1-phosphate receptor 5
ENSG00000272841		3.89627	4.83442e-30	4.07951	1.37241e-31	significant
ENSG00000125398	SOX9	3.8292	1.30066e-21	4.67908	4.00531e-24	significant	SRY-box 9
ENSG00000243225		3.82056	0.00791659	0.899572		not_significant
ENSG00000258976		3.81638	2.14953e-05	3.0491	0.000316439	significant
ENSG00000153531	ADPRHL1	3.80674	1.85902e-24	2.46509	5.42803e-14	significant	ADP-ribosylhydrolase like 1
ENSG00000120217	CD274	3.79785	4.49122e-15	3.55416	1.30147e-24	significant	CD274 molecule
ENSG00000153162	BMP6	3.78349	1.01622e-46	4.54998	1.98967e-25	significant	bone morphogenetic protein 6
ENSG00000164283	ESM1	3.75218	0.00103734	3.33694	0.00510361	significant	endothelial cell specific molecule 1
ENSG00000250697		3.7483	6.62762e-19	4.33002	1.52291e-24	significant
ENSG00000168334	XIRP1	3.72248	0.0148144	2.84655	0.0560249	not_significant	xin actin binding repeat containing 1
ENSG00000260810		3.70828	0.000442314	2.54443	0.0325088	significant
ENSG00000169436	COL22A1	3.68555	2.42386e-20	3.51656	0.00108548	significant	collagen type XXII alpha 1 chain
ENSG00000138696	BMPR1B	3.65489	1.30119e-36	3.21021	9.70779e-09	significant	bone morphogenetic protein receptor type 1B
ENSG00000069482	GAL	3.64039	9.62033e-09	2.61976	3.52828e-15	significant	galanin and GMAP prepropeptide
ENSG00000100626	GALNT16	3.58138	1.77441e-32	1.70219	0.000333105	significant	polypeptide N-acetylgalactosaminyltransferase 16
ENSG00000281207	SLFNL1-AS1	3.57912	3.5328e-17	3.55424	5.87902e-14	significant	SLFNL1 antisense RNA 1
ENSG00000125740	FOSB	3.55013	1.34932e-21	3.58322	3.27142e-20	significant	FosB proto-oncogene, AP-1 transcription factor subunit
ENSG00000177614	PGBD5	3.54253	2.42386e-20	3.94718	2.10941e-21	significant	piggyBac transposable element derived 5
ENSG00000140538	NTRK3	3.52279	3.33989e-08	2.65056	0.00053537	significant	neurotrophic receptor tyrosine kinase 3
ENSG00000282849		3.51458	3.78601e-05	3.21234	7.18174e-07	significant
ENSG00000135074	ADAM19	3.50697	2.85313e-38	2.57329	7.02995e-24	significant	ADAM metallopeptidase domain 19
ENSG00000106366	SERPINE1	3.50297	2.69328e-28	3.43275	7.08872e-45	significant	serpin family E member 1
ENSG00000145040	UCN2	3.48954	2.91348e-51	4.40138	1.69835e-32	significant	urocortin 2
ENSG00000185634	SHC4	3.48644	6.41389e-15	2.48673	1.45797e-09	significant	SHC adaptor protein 4
ENSG00000229056		3.48219	8.15899e-05	3.90147	0.0211492	significant
ENSG00000258602	LINC01629	3.44508	0.01399	0.178226		not_significant	long intergenic non-protein coding RNA 1629
ENSG00000269970		3.3961	0.000207657	3.93283	1.28687e-08	significant
ENSG00000163235	TGFA	3.39159	1.05689e-12	4.19034	3.01075e-08	significant	transforming growth factor alpha
ENSG00000250657		3.37205	2.92741e-14	3.32001	1.01655e-08	significant
ENSG00000103489	XYLT1	3.36633	1.16413e-100	3.25483	6.14066e-60	significant	xylosyltransferase 1
ENSG00000178860	MSC	3.36485	1.92853e-26	2.27307	2.89601e-27	significant	musculin
ENSG00000102802	MEDAG	3.36366	2.80785e-11	2.82708	2.94088e-12	significant	mesenteric estrogen dependent adipogenesis
ENSG00000268941	LINC01711	3.35767	3.71881e-09	3.1534	2.58388e-06	significant	long intergenic non-protein coding RNA 1711
ENSG00000203721	LINC00862	3.35457	1.14043e-09	3.02673	1.70732e-07	significant	long intergenic non-protein coding RNA 862
ENSG00000177283	FZD8	3.34696	3.57492e-49	2.65388	6.30327e-34	significant	frizzled class receptor 8
ENSG00000263050		3.34637	0.00991859	3.31231	0.020162	significant
ENSG00000070404	FSTL3	3.34578	4.11795e-14	3.11096	8.75643e-23	significant	follistatin like 3
ENSG00000132334	PTPRE	3.32747	1.94393e-10	2.9873	2.82418e-09	significant	protein tyrosine phosphatase receptor type E
ENSG00000010438	PRSS3	3.32504	1.49971e-18	1.90891	7.98362e-09	significant	serine protease 3
ENSG00000227220		3.30209	1.61463e-25	3.43826	3.9689e-14	significant
ENSG00000224959		3.29092	1.15223e-11	2.17062	1.20912e-05	significant
ENSG00000114861	FOXP1	3.28765	3.95746e-287	2.69505	6.5577e-59	significant	forkhead box P1
ENSG00000118523	CCN2	3.27392	2.09098e-42	3.609	9.97607e-31	significant	cellular communication network factor 2
ENSG00000104827	CGB3	3.27265	1.6403e-08	3.35912	0.00217608	significant	chorionic gonadotropin subunit beta 3
ENSG00000266709	MGC12916	3.26029	1.26704e-22	2.33226	8.68423e-16	significant	uncharacterized protein MGC12916
ENSG00000167772	ANGPTL4	3.2589	1.30836e-12	4.26815	1.96573e-25	significant	angiopoietin like 4
ENSG00000136630	HLX	3.22725	5.00789e-32	2.54061	5.50084e-23	significant	H2.0 like homeobox
ENSG00000101311	FERMT1	3.21068	1.77919e-18	2.24051	1.91243e-10	significant	fermitin family member 1
ENSG00000198805	PNP	3.20839	6.3472e-19	2.75966	1.91596e-15	significant	purine nucleoside phosphorylase
ENSG00000134107	BHLHE40	3.18803	2.26898e-16	3.06826	6.73818e-23	significant	basic helix-loop-helix family member e40
ENSG00000171310	CHST11	3.17074	5.72646e-164	2.93097	1.39218e-26	significant	carbohydrate sulfotransferase 11
ENSG00000261488		3.16347	8.01989e-16	2.69304	2.91496e-05	significant
ENSG00000265675		3.16181	0.000686609	3.35514	0.000334006	significant
ENSG00000259884		3.14396	0.0081577	2.64277	0.00570379	significant
ENSG00000100302	RASD2	3.13636	8.7679e-15	2.91103	5.70537e-15	significant	RASD family member 2
ENSG00000119866	BCL11A	3.13447	9.18437e-20	1.34431	0.0011065	significant	BAF chromatin remodeling complex subunit BCL11A
ENSG00000092969	TGFB2	3.13227	6.20841e-09	2.14492	1.0551e-06	significant	transforming growth factor beta 2
ENSG00000163376	KBTBD8	3.13144	1.4114e-17	2.22932	2.61762e-07	significant	kelch repeat and BTB domain containing 8
ENSG00000173848	NET1	3.13102	2.30101e-16	2.96173	8.49849e-21	significant	neuroepithelial cell transforming 1
ENSG00000256448		3.11992	0.00209303	2.57187	0.00476179	significant
ENSG00000107249	GLIS3	3.10686	1.67741e-25	1.75684	1.48173e-17	significant	GLIS family zinc finger 3
ENSG00000157680	DGKI	3.1057	4.90078e-104	2.40557	3.64098e-23	significant	diacylglycerol kinase iota
ENSG00000165617	DACT1	3.10465	3.2513e-20	3.3335	1.9105e-15	significant	dishevelled binding antagonist of beta catenin 1
ENSG00000277502		3.08199	0.00146884	1.05763	0.639945	not_significant
ENSG00000268287		3.07589	0.00139149	3.04187	1.63826e-07	significant
ENSG00000258875		3.06759	1.3862e-08	2.63088	1.73406e-06	significant
ENSG00000231298	MANCR	3.06622	7.217e-09	2.68022	5.06377e-07	significant	mitotically associated long non coding RNA
ENSG00000114529	C3orf52	3.04579	2.11597e-16	2.84278	4.21525e-17	significant	chromosome 3 open reading frame 52
ENSG00000090530	P3H2	3.04499	9.18926e-30	2.29259	3.09558e-16	significant	prolyl 3-hydroxylase 2
ENSG00000113070	HBEGF	3.03281	1.18646e-11	4.36292	3.0032e-33	significant	heparin binding EGF like growth factor
ENSG00000236094	LINC00545	3.00184	0.000610847	2.62383	0.00462916	significant	long intergenic non-protein coding RNA 545
ENSG00000103522	IL21R	3.00061	7.46778e-07	2.3799	3.17155e-07	significant	interleukin 21 receptor
ENSG00000117525	F3	2.99544	5.00789e-32	3.05426	8.22552e-43	significant	coagulation factor III, tissue factor
ENSG00000268108		2.99161	0.00120896	3.09918	3.95189e-06	significant
ENSG00000171488	LRRC8C	2.98274	2.80201e-46	2.58345	3.13975e-35	significant	leucine rich repeat containing 8 VRAC subunit C
ENSG00000236453		2.97959	0.000193305	3.84379	2.41505e-12	significant
ENSG00000167034	NKX3-1	2.97293	5.78839e-33	3.02426	2.39439e-59	significant	NK3 homeobox 1
ENSG00000125430	HS3ST3B1	2.96953	2.32335e-44	2.32878	3.12217e-38	significant	heparan sulfate-glucosamine 3-sulfotransferase 3B1
ENSG00000115290	GRB14	2.96835	2.60568e-09	4.60398	5.38175e-11	significant	growth factor receptor bound protein 14
ENSG00000134259	NGF	2.96022	1.64066e-57	3.07272	1.16208e-41	significant	nerve growth factor
ENSG00000170961	HAS2	2.95088	3.92202e-06	3.55908	4.08178e-13	significant	hyaluronan synthase 2
ENSG00000171246	NPTX1	2.94843	2.34297e-05	3.13417	5.77186e-07	significant	neuronal pentraxin 1
ENSG00000213412	HNRNPA1P33	2.94072	2.83853e-13	2.08786	0.00450554	significant	heterogeneous nuclear ribonucleoprotein A1 pseudogene 33
ENSG00000208024	MIR199A2	2.93526	0.0329835	4.69124	0.0016462	significant	microRNA 199a-2
ENSG00000197249	SERPINA1	2.93108	4.56675e-05	1.53743	0.00934927	significant	serpin family A member 1
ENSG00000153820	SPHKAP	2.91176	1.0892e-08	2.44721	1.77702e-08	significant	SPHK1 interactor, AKAP domain containing
ENSG00000270190		2.86375	1.85934e-07	2.14564	0.00218253	significant
ENSG00000136603	SKIL	2.85902	1.50147e-09	2.70559	3.4495e-10	significant	SKI like proto-oncogene
ENSG00000145555	MYO10	2.85167	9.42608e-31	2.94081	6.53499e-58	significant	myosin X
ENSG00000169429	CXCL8	2.83269	0.0272175	3.16224	0.000326387	significant	C-X-C motif chemokine ligand 8
ENSG00000171608	PIK3CD	2.81391	3.47057e-38	2.18913	7.76945e-23	significant	phosphatidylinositol-4,5-bisphosphate 3-kinase catalytic subunit delta
ENSG00000103942	HOMER2	2.80697	2.85745e-29	1.95891	6.12002e-30	significant	homer scaffold protein 2
ENSG00000280721		2.8032	9.03173e-06	2.6524	5.77635e-09	significant
ENSG00000157551	KCNJ15	2.7954	0.0217723	1.76551	0.00665026	significant	potassium voltage-gated channel subfamily J member 15
ENSG00000168621	GDNF	2.79247	4.05744e-14	3.75542	4.21809e-25	significant	glial cell derived neurotrophic factor
ENSG00000152413	HOMER1	2.79136	3.44313e-26	1.99036	1.8599e-19	significant	homer scaffold protein 1
ENSG00000182378	PLCXD1	2.78594	6.662e-31	2.20592	1.45768e-13	significant	phosphatidylinositol specific phospholipase C X domain containing 1
ENSG00000140379	BCL2A1	2.78528	5.66629e-05	1.93983	0.0457785	significant	BCL2 related protein A1
ENSG00000276850		2.77995	1.49742e-16	1.3093	0.00237026	significant
ENSG00000125637	PSD4	2.77483	9.92815e-36	2.63101	1.27596e-72	significant	pleckstrin and Sec7 domain containing 4
ENSG00000203786	KPRP	2.77244	0.0146292	4.51249	0.000140706	significant	keratinocyte proline rich protein
ENSG00000158966	CACHD1	2.76367	6.60942e-10	0.444874	0.103577	not_significant	cache domain containing 1
ENSG00000112759	SLC29A1	2.75741	1.71325e-20	2.18876	3.32814e-05	significant	solute carrier family 29 member 1 (Augustine blood group)
ENSG00000175746	C15orf54	2.73007	0.000752703	2.64165	0.00400784	significant	chromosome 15 open reading frame 54 (putative)
ENSG00000189120	SP6	2.72831	1.97224e-06	2.08115	0.000356057	significant	Sp6 transcription factor
ENSG00000253633	LOC107986898	2.71701	9.10859e-05	1.86601	0.00709661	significant	uncharacterized LOC107986898
ENSG00000144655	CSRNP1	2.71608	3.33642e-12	2.29463	3.43594e-11	significant	cysteine and serine rich nuclear protein 1
ENSG00000103257	SLC7A5	2.71107	3.72143e-10	1.88844	0.0294456	significant	solute carrier family 7 member 5
ENSG00000008513	ST3GAL1	2.69998	4.40968e-24	1.49905	3.96108e-06	significant	ST3 beta-galactoside alpha-2,3-sialyltransferase 1
ENSG00000173334	TRIB1	2.69661	1.81814e-12	1.95633	1.09828e-12	significant	tribbles pseudokinase 1
ENSG00000114270	COL7A1	2.69049	1.53282e-47	2.5921	3.56703e-22	significant	collagen type VII alpha 1 chain
ENSG00000222022		2.68906	0.000181713	2.63206	0.016402	significant
ENSG00000057657	PRDM1	2.6865	4.72856e-09	2.38089	1.48743e-11	significant	PR/SET domain 1
ENSG00000100003	SEC14L2	2.68271	1.90573e-18	2.5612	2.33812e-13	significant	SEC14 like lipid binding 2
ENSG00000265190	ANXA8	2.68212	3.31871e-15	1.52267	2.08575e-07	significant	annexin A8
ENSG00000073756	PTGS2	2.67969	3.05745e-12	3.07004	4.61753e-12	significant	prostaglandin-endoperoxide synthase 2
ENSG00000144749	LRIG1	2.67965	5.82438e-10	3.00566	5.63653e-14	significant	leucine rich repeats and immunoglobulin like domains 1
ENSG00000138311	ZNF365	2.67608	1.42383e-21	2.15021	8.84791e-14	significant	zinc finger protein 365
ENSG00000170873	MTSS1	2.66318	1.66401e-08	2.03942	0.000604688	significant	MTSS I-BAR domain containing 1
ENSG00000143179	UCK2	2.66241	4.23394e-39	2.24075	1.08106e-30	significant	uridine-cytidine kinase 2
ENSG00000225614	ZNF469	2.66173	3.03779e-10	2.21453	5.08912e-12	significant	zinc finger protein 469
ENSG00000151136	BTBD11	2.65641	4.68661e-13	2.43403	1.59181e-12	significant	BTB domain containing 11
ENSG00000101384	JAG1	2.65601	1.46489e-08	1.81985	0.000202095	significant	jagged canonical Notch ligand 1
ENSG00000141068	KSR1	2.64601	9.8183e-21	1.85563	5.35584e-13	significant	kinase suppressor of ras 1
ENSG00000177374	HIC1	2.64311	8.63604e-13	1.72813	0.000236571	significant	HIC ZBTB transcriptional repressor 1
ENSG00000274354		2.6316	9.82773e-07	1.35261	0.0423526	significant
ENSG00000158125	XDH	2.62763	1.73267e-05	1.11667	0.0230478	significant	xanthine dehydrogenase
ENSG00000185972	CCIN	2.61875	2.46103e-09	2.52287	5.38134e-14	significant	calicin
ENSG00000182578	CSF1R	2.61203	1.39551e-15	3.09575	3.73517e-12	significant	colony stimulating factor 1 receptor
ENSG00000222032		2.61093	5.85139e-06	2.63051	0.00455528	significant
ENSG00000178726	THBD	2.6076	6.2009e-10	0.300153	0.472172	not_significant	thrombomodulin
ENSG00000164949	GEM	2.59924	1.02358e-07	3.14111	1.43513e-09	significant	GTP binding protein overexpressed in skeletal muscle
ENSG00000183715	OPCML	2.59186	1.86587e-08	2.63212	3.31403e-10	significant	opioid binding protein/cell adhesion molecule like
ENSG00000206737	RNVU1-18	2.58921	0.00380881	-0.666184	0.581487	not_significant	RNA, variant U1 small nuclear 18
ENSG00000119714	GPR68	2.5848	0.00011849	2.99438	1.43513e-09	significant	G protein-coupled receptor 68
ENSG00000279415		2.58449	2.45659e-12	1.56251	7.7e-08	significant
ENSG00000203711	C6orf99	2.58153	0.000307987	1.07265		not_significant	chromosome 6 open reading frame 99
ENSG00000169594	BNC1	2.5765	2.84148e-22	2.48112	3.64098e-23	significant	basonuclin 1
ENSG00000222041	CYTOR	2.57127	9.15118e-70	2.00211	2.19047e-39	significant	cytoskeleton regulator RNA
ENSG00000267325		2.56197	7.0483e-10	2.47858	5.79844e-06	significant
ENSG00000004660	CAMKK1	2.56163	2.29354e-10	1.72282	0.00139595	significant	calcium/calmodulin dependent protein kinase kinase 1
ENSG00000168675	LDLRAD4	2.55904	4.9384e-07	2.99174	0.000327436	significant	low density lipoprotein receptor class A domain containing 4
ENSG00000139116	KIF21A	2.55666	3.59328e-26	1.70692	1.78217e-07	significant	kinesin family member 21A
ENSG00000144596	GRIP2	2.55235	4.89605e-05	1.45045	0.000479187	significant	glutamate receptor interacting protein 2
ENSG00000262454		2.5476	5.06564e-12	1.72795	1.09651e-05	significant
ENSG00000240583	AQP1	2.54753	2.40634e-06	1.17235	0.00457336	significant	aquaporin 1 (Colton blood group)
ENSG00000189052	CGB5	2.54268	8.35275e-09	2.69989	5.17262e-09	significant	chorionic gonadotropin subunit beta 5
ENSG00000054967	RELT	2.54091	9.64118e-20	2.36466	1.40537e-22	significant	RELT TNF receptor
ENSG00000108691	CCL2	2.53216	0.00358076	2.67645	6.05107e-11	significant	C-C motif chemokine ligand 2
ENSG00000273760		2.52652	1.29148e-05	1.65505	0.00450509	significant
ENSG00000102755	FLT1	2.5259	1.71224e-15	1.08059	3.70996e-07	significant	fms related tyrosine kinase 1
ENSG00000008056	SYN1	2.5003	1.26029e-17	1.88751	1.11938e-05	significant	synapsin I
ENSG00000231131	LNCAROD	2.48959	6.2492e-08	3.03119	3.1472e-17	significant	lncRNA activating regulator of DKK1
ENSG00000171729	TMEM51	2.48593	9.5244e-06	1.70579	0.0360094	significant	transmembrane protein 51
ENSG00000187498	COL4A1	2.48364	2.79026e-11	1.57724	1.22141e-08	significant	collagen type IV alpha 1 chain
ENSG00000185442	FAM174B	2.46809	6.41536e-21	1.1232	7.82477e-09	significant	family with sequence similarity 174 member B
ENSG00000131459	GFPT2	2.46638	3.41337e-30	2.34466	6.04287e-35	significant	glutamine-fructose-6-phosphate transaminase 2
ENSG00000272273	IER3-AS1	2.45816	1.86507e-08	1.68835	0.000839934	significant	IER3 antisense RNA 1
ENSG00000183688	RFLNB	2.45447	1.80378e-27	2.16374	3.50412e-21	significant	refilin B
ENSG00000169908	TM4SF1	2.4542	0.00163923	2.74283	2.29277e-07	significant	transmembrane 4 L six family member 1
ENSG00000165434	PGM2L1	2.45382	5.97529e-25	2.60739	1.1081e-16	significant	phosphoglucomutase 2 like 1
ENSG00000011422	PLAUR	2.45173	1.17697e-24	2.41032	7.69748e-43	significant	plasminogen activator, urokinase receptor
ENSG00000100234	TIMP3	2.43999	7.84005e-34	2.95476	3.42534e-38	significant	TIMP metallopeptidase inhibitor 3
ENSG00000105825	TFPI2	2.43743	0.0119343	1.91896	0.049897	significant	tissue factor pathway inhibitor 2
ENSG00000133794	ARNTL	2.43515	1.24402e-26	2.42854	4.77994e-12	significant	aryl hydrocarbon receptor nuclear translocator like
ENSG00000143067	ZNF697	2.43281	8.04574e-22	1.62716	2.31335e-07	significant	zinc finger protein 697
ENSG00000170340	B3GNT2	2.43167	5.09885e-37	2.20479	2.53684e-18	significant	UDP-GlcNAc:betaGal beta-1,3-N-acetylglucosaminyltransferase 2
ENSG00000246430	LINC00968	2.42809	7.3712e-07	1.65417	1.43732e-05	significant	long intergenic non-protein coding RNA 968
ENSG00000123358	NR4A1	2.41855	0.00113602	2.47073	0.00278966	significant	nuclear receptor subfamily 4 group A member 1
ENSG00000185306	C12orf56	2.41596	1.02921e-06	2.18898	3.52199e-05	significant	chromosome 12 open reading frame 56
ENSG00000279191		2.4158	1.51112e-15	1.74662	7.05568e-10	significant
ENSG00000182379	NXPH4	2.41184	1.1854e-26	1.21693	1.81626e-08	significant	neurexophilin 4
ENSG00000154319	FAM167A	2.41121	0.000192526	2.04686	7.12569e-05	significant	family with sequence similarity 167 member A
ENSG00000118257	NRP2	2.41011	1.44709e-11	1.72893	8.1545e-15	significant	neuropilin 2
ENSG00000237989	LINC01679	2.40653	1.50139e-06	1.02172	0.0349608	significant	long intergenic non-protein coding RNA 1679
ENSG00000086730	LAT2	2.39931	3.92202e-06	2.29267	3.25547e-05	significant	linker for activation of T cells family member 2
ENSG00000100292	HMOX1	2.39528	1.62541e-07	1.86574	5.14241e-06	significant	heme oxygenase 1
ENSG00000148841	ITPRIP	2.39325	3.13307e-22	2.25769	7.39712e-12	significant	inositol 1,4,5-trisphosphate receptor interacting protein
ENSG00000229647	MYOSLID	2.38599	1.3486e-13	2.04952	1.87006e-08	significant	myocardin-induced smooth muscle lncRNA, inducer of differentiation
ENSG00000133816	MICAL2	2.37499	7.73211e-19	2.06049	1.07638e-22	significant	microtubule associated monooxygenase, calponin and LIM domain containing 2
ENSG00000171223	JUNB	2.365	8.04731e-11	1.63565	1.60457e-05	significant	JunB proto-oncogene, AP-1 transcription factor subunit
ENSG00000154127	UBASH3B	2.36157	1.43403e-14	2.28897	1.28277e-38	significant	ubiquitin associated and SH3 domain containing B
ENSG00000249378	LINC01060	2.34316	1.10772e-06	1.39177	5.49158e-05	significant	long intergenic non-protein coding RNA 1060
ENSG00000141052	MYOCD	2.33664	3.06747e-05	3.3536	0.000649531	significant	myocardin
ENSG00000171793	CTPS1	2.32987	4.03643e-41	2.02603	2.99349e-20	significant	CTP synthase 1
ENSG00000111863	ADTRP	2.32675	0.000251605	3.03848	1.60703e-06	significant	androgen dependent TFPI regulating protein
ENSG00000142661	MYOM3	2.32579	6.8484e-28	2.80374	8.81513e-07	significant	myomesin 3
ENSG00000112139	MDGA1	2.32241	2.82846e-50	0.457838	0.000481078	significant	MAM domain containing glycosylphosphatidylinositol anchor 1
ENSG00000162849	KIF26B	2.32082	8.41832e-07	1.64436	0.000132922	significant	kinesin family member 26B
ENSG00000147234	FRMPD3	2.31385	1.69177e-10	2.43423	5.09411e-10	significant	FERM and PDZ domain containing 3
ENSG00000104881	PPP1R13L	2.31156	1.8952e-32	1.74799	2.47829e-08	significant	protein phosphatase 1 regulatory subunit 13 like
ENSG00000172575	RASGRP1	2.31032	2.12531e-07	2.54657	5.2351e-14	significant	RAS guanyl releasing protein 1
ENSG00000205336	ADGRG1	2.30372	0.000674936	3.2411	1.47508e-09	significant	adhesion G protein-coupled receptor G1
ENSG00000104368	PLAT	2.29945	6.48715e-09	1.42899	6.16328e-07	significant	plasminogen activator, tissue type
ENSG00000158321	AUTS2	2.29627	2.22338e-65	1.83569	9.85207e-18	significant	activator of transcription and developmental regulator AUTS2
ENSG00000154928	EPHB1	2.29341	2.00082e-15	2.43361	1.4737e-10	significant	EPH receptor B1
ENSG00000169026	SLC49A3	2.29113	7.19255e-37	1.50823	1.49672e-18	significant	solute carrier family 49 member 3
ENSG00000138623	SEMA7A	2.28559	1.63061e-07	2.03249	9.52442e-08	significant	semaphorin 7A (John Milton Hagen blood group)
ENSG00000184995	IFNE	2.28476	6.89458e-11	2.41453	1.20439e-13	significant	interferon epsilon
ENSG00000099860	GADD45B	2.28395	8.05619e-26	2.30512	2.39278e-33	significant	growth arrest and DNA damage inducible beta
ENSG00000165891	E2F7	2.28334	2.17352e-05	1.35529	0.0341295	significant	E2F transcription factor 7
ENSG00000105738	SIPA1L3	2.27955	2.61458e-20	2.15999	1.40632e-19	significant	signal induced proliferation associated 1 like 3
ENSG00000008083	JARID2	2.27803	1.14131e-33	1.37748	4.32521e-08	significant	jumonji and AT-rich interaction domain containing 2
ENSG00000150551	LYPD1	2.2763	0.00115662	2.76538	1.30394e-05	significant	LY6/PLAUR domain containing 1
ENSG00000101665	SMAD7	2.27275	3.19664e-17	2.16052	1.65296e-16	significant	SMAD family member 7
ENSG00000168811	IL12A	2.25346	6.29513e-06	2.70259	3.92559e-05	significant	interleukin 12A
ENSG00000170558	CDH2	2.25099	5.2269e-14	1.19323	0.00616462	significant	cadherin 2
ENSG00000267257		2.25073	1.31348e-07	1.47656	0.000588808	significant
ENSG00000119927	GPAM	2.24658	4.23964e-54	2.24082	1.44056e-31	significant	glycerol-3-phosphate acyltransferase, mitochondrial
ENSG00000143878	RHOB	2.24441	1.96277e-11	1.75368	2.80276e-07	significant	ras homolog family member B
ENSG00000188522	FAM83G	2.24295	1.97337e-08	2.05498	5.0156e-08	significant	family with sequence similarity 83 member G
ENSG00000105088	OLFM2	2.24065	0.00510023	1.97071	1.77174e-07	significant	olfactomedin 2
ENSG00000213859	KCTD11	2.23763	1.3543e-08	1.98406	1.44741e-05	significant	potassium channel tetramerization domain containing 11
ENSG00000178607	ERN1	2.23585	1.342e-32	1.68028	5.63602e-22	significant	endoplasmic reticulum to nucleus signaling 1
ENSG00000179431	FJX1	2.23196	1.92769e-15	1.84189	5.50084e-23	significant	four-jointed box kinase 1
ENSG00000084710	EFR3B	2.22837	3.49135e-16	1.43286	4.66446e-06	significant	EFR3 homolog B
ENSG00000100558	PLEK2	2.2267	1.48506e-16	2.25525	7.58988e-34	significant	pleckstrin 2
ENSG00000183696	UPP1	2.22429	1.85769e-11	2.07839	9.51958e-20	significant	uridine phosphorylase 1
ENSG00000235770	LINC00607	2.21452	2.54612e-10	2.39246	3.21493e-19	significant	long intergenic non-protein coding RNA 607
ENSG00000260428	SCX	2.20531	6.23059e-08	1.97349	1.33384e-05	significant	scleraxis bHLH transcription factor
ENSG00000172965	MIR4435-2HG	2.20137	8.27141e-58	1.8652	1.91459e-67	significant	MIR4435-2 host gene
ENSG00000124813	RUNX2	2.19975	1.08852e-29	0.778167	6.09952e-05	significant	RUNX family transcription factor 2
ENSG00000264230	ANXA8L1	2.19628	2.23673e-12	1.4594	1.49174e-05	significant	annexin A8 like 1
ENSG00000203805	PLPP4	2.1827	1.29848e-31	1.5444	2.32037e-10	significant	phospholipid phosphatase 4
ENSG00000171033	PKIA	2.1821	6.77556e-10	2.92132	5.04578e-10	significant	cAMP-dependent protein kinase inhibitor alpha
ENSG00000175727	MLXIP	2.18045	3.50096e-74	2.03181	1.24071e-53	significant	MLX interacting protein
ENSG00000124766	SOX4	2.17675	1.2427e-11	1.76149	3.73629e-08	significant	SRY-box 4
ENSG00000104415	CCN4	2.17017	1.15456e-08	1.53585	0.000326387	significant	cellular communication network factor 4
ENSG00000117036	ETV3	2.16634	6.83969e-08	1.39444	0.00137031	significant	ETS variant 3
ENSG00000166292	TMEM100	2.16618	0.000225472	1.43453	0.019671	significant	transmembrane protein 100
ENSG00000095303	PTGS1	2.16279	4.03451e-06	1.84913	9.21469e-08	significant	prostaglandin-endoperoxide synthase 1
ENSG00000165379	LRFN5	2.1569	7.83946e-06	4.3491	0.00608224	significant	leucine rich repeat and fibronectin type III domain containing 5
ENSG00000135362	PRR5L	2.15565	3.77067e-27	3.60811	3.85377e-14	significant	proline rich 5 like
ENSG00000169756	LIMS1	2.15389	5.07965e-35	1.826	5.79482e-23	significant	LIM zinc finger domain containing 1
ENSG00000271590		2.14619	1.53072e-18	1.45951	1.58188e-10	significant
ENSG00000135111	TBX3	2.13945	8.00114e-17	1.8979	1.96559e-23	significant	T-box 3
ENSG00000242114	MTFP1	2.12605	3.15493e-07	1.43339	7.08837e-05	significant	mitochondrial fission process 1
ENSG00000113645	WWC1	2.12406	3.54527e-08	1.6974	0.000227801	significant	WW and C2 domain containing 1
ENSG00000143367	TUFT1	2.1201	7.19138e-09	1.0978	0.00342494	significant	tuftelin 1
ENSG00000153976	HS3ST3A1	2.10928	7.77698e-18	2.05654	1.86114e-52	significant	heparan sulfate-glucosamine 3-sulfotransferase 3A1
ENSG00000017483	SLC38A5	2.10586	5.71282e-11	2.04465	1.64571e-17	significant	solute carrier family 38 member 5
ENSG00000198369	SPRED2	2.10161	6.79138e-28	1.10476	2.92929e-07	significant	sprouty related EVH1 domain containing 2
ENSG00000169330	MINAR1	2.09882	2.15313e-11	1.27742	0.000201257	significant	membrane integral NOTCH2 associated receptor 1
ENSG00000126785	RHOJ	2.09416	1.74012e-09	1.39735	1.95524e-06	significant	ras homolog family member J
ENSG00000127152	BCL11B	2.08276	1.49706e-15	1.36092	0.000420399	significant	BAF chromatin remodeling complex subunit BCL11B
ENSG00000153234	NR4A2	2.07262	0.0238014	2.90382	0.0199114	significant	nuclear receptor subfamily 4 group A member 2
ENSG00000261327		2.06972	2.497e-07	1.67772	0.00183678	significant
ENSG00000120158	RCL1	2.06941	1.97257e-27	1.63671	9.9452e-18	significant	RNA terminal phosphate cyclase like 1
ENSG00000256977	LIMS3	2.06919	8.56321e-08	1.64956	8.36643e-12	significant	LIM zinc finger domain containing 3
ENSG00000213030	CGB8	2.0646	1.95612e-05	2.30557	6.72933e-06	significant	chorionic gonadotropin subunit beta 8
ENSG00000188916	INSYN2A	2.05767	4.4862e-08	2.01009	3.43183e-06	significant	inhibitory synaptic factor 2A
ENSG00000260196		2.0561	3.34469e-10	0.456047	0.412566	not_significant
ENSG00000200087	SNORA73B	2.05533	0.00718131	1.03074	0.184787	not_significant	small nucleolar RNA, H/ACA box 73B
ENSG00000279822		2.04821	2.88531e-05	2.93404	2.02279e-12	significant
ENSG00000139211	AMIGO2	2.04714	0.000176144	3.20647	7.29116e-06	significant	adhesion molecule with Ig like domain 2
ENSG00000158859	ADAMTS4	2.03712	1.77975e-26	2.94469	2.20567e-21	significant	ADAM metallopeptidase with thrombospondin type 1 motif 4
ENSG00000136997	MYC	2.03455	4.46023e-15	1.73855	2.74416e-14	significant	MYC proto-oncogene, bHLH transcription factor
ENSG00000249669		2.03434	1.49493e-06	2.09107	4.26133e-09	significant
ENSG00000198814	GK	2.03307	5.69977e-06	2.1399	5.15225e-06	significant	glycerol kinase
ENSG00000085511	MAP3K4	2.03286	2.74739e-42	1.92784	1.42193e-24	significant	mitogen-activated protein kinase kinase kinase 4
ENSG00000112414	ADGRG6	2.03199	2.94982e-10	1.42424	7.11802e-07	significant	adhesion G protein-coupled receptor G6
ENSG00000198796	ALPK2	2.02818	6.3378e-14	0.999069	0.0277411	significant	alpha kinase 2
ENSG00000165732	DDX21	2.02625	5.09126e-29	1.82523	3.7349e-18	significant	DExD-box helicase 21
ENSG00000107957	SH3PXD2A	2.00872	4.77366e-16	1.87962	2.66678e-10	significant	SH3 and PX domains 2A
ENSG00000104783	KCNN4	2.0044	2.90786e-06	2.71536	4.23679e-14	significant	potassium calcium-activated channel subfamily N member 4
ENSG00000111859	NEDD9	1.99328	1.39557e-08	2.24662	3.35168e-06	significant	neural precursor cell expressed, developmentally down-regulated 9
ENSG00000248690		1.99262	1.56384e-07	2.4369	1.05718e-09	significant
ENSG00000151014	NOCT	1.99022	5.88296e-12	1.91086	3.53612e-13	significant	nocturnin
ENSG00000123689	G0S2	1.9799	0.0381986	1.857	0.000175182	significant	G0/G1 switch 2
ENSG00000064393	HIPK2	1.97802	1.70673e-31	1.34584	6.0226e-06	significant	homeodomain interacting protein kinase 2
ENSG00000123500	COL10A1	1.97758	0.000125475	1.32506	0.244475	not_significant	collagen type X alpha 1 chain
ENSG00000117877	CD3EAP	1.97646	4.51783e-12	1.52606	5.69097e-16	significant	CD3e molecule associated protein
ENSG00000164171	ITGA2	1.97586	0.000130947	2.29424	1.01369e-10	significant	integrin subunit alpha 2
ENSG00000086062	B4GALT1	1.97368	6.46071e-14	1.7733	2.22128e-14	significant	beta-1,4-galactosyltransferase 1
ENSG00000138835	RGS3	1.97358	2.88146e-26	2.20901	1.01769e-19	significant	regulator of G protein signaling 3
ENSG00000048162	NOP16	1.97255	1.55647e-17	1.64952	1.08752e-16	significant	NOP16 nucleolar protein
ENSG00000137094	DNAJB5	1.96542	1.69207e-18	1.80538	1.38794e-20	significant	DnaJ heat shock protein family (Hsp40) member B5
ENSG00000188064	WNT7B	1.96512	2.30017e-07	3.55283	7.31386e-11	significant	Wnt family member 7B
ENSG00000197594	ENPP1	1.9643	2.8124e-07	1.7486	6.39451e-05	significant	ectonucleotide pyrophosphatase/phosphodiesterase 1
ENSG00000267493		1.9637	1.58358e-05	0.955567	0.0577613	not_significant
ENSG00000127124	HIVEP3	1.95629	1.01027e-06	1.70525	2.44009e-09	significant	human immunodeficiency virus type I enhancer binding protein 3
ENSG00000083454	P2RX5	1.95024	2.06378e-08	1.46869	0.00104363	significant	purinergic receptor P2X 5
ENSG00000158158	CNNM4	1.94793	6.44397e-23	0.368287	0.410105	not_significant	cyclin and CBS domain divalent metal cation transport mediator 4
ENSG00000198948	MFAP3L	1.94478	8.36563e-31	1.66861	2.19901e-07	significant	microfibril associated protein 3 like
ENSG00000152952	PLOD2	1.94418	1.00167e-07	1.78273	2.39713e-06	significant	procollagen-lysine,2-oxoglutarate 5-dioxygenase 2
ENSG00000163637	PRICKLE2	1.94374	1.45797e-29	0.527451	0.0386774	significant	prickle planar cell polarity protein 2
ENSG00000230630		1.93938	1.12135e-30	2.10793	2.39515e-27	significant
ENSG00000128805	ARHGAP22	1.93315	1.36355e-05	2.67746	3.52073e-12	significant	Rho GTPase activating protein 22
ENSG00000128590	DNAJB9	1.93188	2.15027e-11	1.56111	0.000755363	significant	DnaJ heat shock protein family (Hsp40) member B9
ENSG00000121297	TSHZ3	1.92796	5.01275e-12	1.20919	0.00274734	significant	teashirt zinc finger homeobox 3
ENSG00000007237	GAS7	1.92068	1.59853e-23	1.55574	3.41319e-11	significant	growth arrest specific 7
ENSG00000172331	BPGM	1.91918	4.64577e-33	0.758193	1.48433e-07	significant	bisphosphoglycerate mutase
ENSG00000198959	TGM2	1.91662	1.57802e-06	3.11721	3.78756e-24	significant	transglutaminase 2
ENSG00000268655	LOC101059948	1.91281	1.03856e-05	1.81649	0.035505	significant	uncharacterized LOC101059948
ENSG00000173926	MARCH3	1.9097	0.000447753	1.33284	0.00888763	significant	membrane associated ring-CH-type finger 3
ENSG00000157168	NRG1	1.90928	8.07947e-06	2.36951	1.71002e-18	significant	neuregulin 1
ENSG00000105810	CDK6	1.90085	1.17235e-29	1.33202	5.87263e-12	significant	cyclin dependent kinase 6
ENSG00000251615		1.89698	0.00012468	1.43941	7.4606e-05	significant
ENSG00000196739	COL27A1	1.89594	2.38847e-17	1.65179	1.30979e-28	significant	collagen type XXVII alpha 1 chain
ENSG00000274630		1.8881	0.00217046	1.85029	0.000170993	significant
ENSG00000131435	PDLIM4	1.88612	9.62749e-18	1.60634	1.00946e-17	significant	PDZ and LIM domain 4
ENSG00000155090	KLF10	1.88401	4.33048e-12	1.99583	6.77938e-18	significant	Kruppel like factor 10
ENSG00000196449	YRDC	1.87802	1.02732e-18	1.83021	1.96001e-16	significant	yrdC N6-threonylcarbamoyltransferase domain containing
ENSG00000132003	ZSWIM4	1.87634	5.14991e-11	1.45057	6.78894e-07	significant	zinc finger SWIM-type containing 4
ENSG00000227992		1.87229	8.82911e-06	1.57002	0.000819053	significant
ENSG00000148677	ANKRD1	1.87137	2.12079e-06	0.51765	0.672687	not_significant	ankyrin repeat domain 1
ENSG00000103196	CRISPLD2	1.87103	8.50668e-05	2.23733	1.541e-05	significant	cysteine rich secretory protein LCCL domain containing 2
ENSG00000128591	FLNC	1.86677	9.90651e-08	1.47479	3.41269e-07	significant	filamin C
ENSG00000198042	MAK16	1.85944	2.09434e-31	1.55148	5.42561e-17	significant	MAK16 homolog
ENSG00000183578	TNFAIP8L3	1.85659	2.95793e-11	1.10463	0.000342087	significant	TNF alpha induced protein 8 like 3
ENSG00000196337	CGB7	1.8552	3.22353e-08	1.42696	0.00106854	significant	chorionic gonadotropin subunit beta 7
ENSG00000273730		1.85426	1.11741e-05	0.639637	0.444852	not_significant
ENSG00000274917		1.85426	1.11741e-05	0.639637	0.444852	not_significant
ENSG00000275215	RNA5-8SN3	1.85426	1.11741e-05	0.639637	0.444852	not_significant	RNA, 5.8S ribosomal N3
ENSG00000275757		1.85426	1.11741e-05	0.639637	0.444852	not_significant
ENSG00000276700		1.85426	1.11741e-05	0.639637	0.444852	not_significant
ENSG00000277739		1.85426	1.11741e-05	0.639637	0.444852	not_significant
ENSG00000278189	RNA5-8SN1	1.85426	1.11741e-05	0.639637	0.444852	not_significant	RNA, 5.8S ribosomal N1
ENSG00000278233	RNA5-8SN2	1.85426	1.11741e-05	0.639637	0.444852	not_significant	RNA, 5.8S ribosomal N2
ENSG00000135048	CEMIP2	1.85264	1.31517e-09	1.93624	1.30108e-19	significant	cell migration inducing hyaluronidase 2
ENSG00000173846	PLK3	1.85089	5.32932e-09	1.60326	2.32299e-06	significant	polo like kinase 3
ENSG00000255176		1.84899	4.33229e-05	1.71191	0.000225176	significant
ENSG00000162975	KCNF1	1.84649	1.44248e-08	2.31567	0.000334006	significant	potassium voltage-gated channel modifier subfamily F member 1
ENSG00000163735	CXCL5	1.84645	0.046616	1.55425	0.0033299	significant	C-X-C motif chemokine ligand 5
ENSG00000255112	CHMP1B	1.84583	2.38065e-06	2.07347	0.00299974	significant	charged multivesicular body protein 1B
ENSG00000177169	ULK1	1.836	1.19372e-09	0.958117	0.000536383	significant	unc-51 like autophagy activating kinase 1
ENSG00000188211	NCR3LG1	1.83334	1.45237e-11	0.583369	0.168169	not_significant	natural killer cell cytotoxicity receptor 3 ligand 1
ENSG00000173451	THAP2	1.83209	3.77667e-12	1.58278	1.07192e-11	significant	THAP domain containing 2
ENSG00000052795	FNIP2	1.82945	1.24659e-39	1.45647	5.3223e-17	significant	folliculin interacting protein 2
ENSG00000176170	SPHK1	1.82926	4.93444e-08	2.03164	1.4026e-23	significant	sphingosine kinase 1
ENSG00000120875	DUSP4	1.82846	0.000791957	1.49779	0.00235617	significant	dual specificity phosphatase 4
ENSG00000253669		1.82791	6.48178e-06	1.99839	3.91284e-06	significant
ENSG00000088538	DOCK3	1.8214	1.03303e-09	1.77209	0.000249725	significant	dedicator of cytokinesis 3
ENSG00000116701	NCF2	1.80841	0.00126761	2.38426	0.00385529	significant	neutrophil cytosolic factor 2
ENSG00000171889		1.80659	1.65168e-08	1.82889	7.14432e-14	significant
ENSG00000110660	SLC35F2	1.80454	1.87788e-14	1.53721	2.54156e-35	significant	solute carrier family 35 member F2
ENSG00000131473	ACLY	1.80366	2.67503e-27	2.15452	1.45785e-32	significant	ATP citrate lyase
ENSG00000271857		1.80006	0.00138028	0.0982306	0.926243	not_significant
ENSG00000094975	SUCO	1.7998	5.18023e-33	1.5957	1.6273e-13	significant	SUN domain containing ossification factor
ENSG00000258967		1.79206	0.00820859	1.28664	0.0161027	significant
ENSG00000118515	SGK1	1.79128	6.81328e-20	1.96009	3.28018e-11	significant	serum/glucocorticoid regulated kinase 1
ENSG00000070423	RNF126	1.7908	7.90821e-20	1.60252	3.23936e-14	significant	ring finger protein 126
ENSG00000261373	VPS9D1-AS1	1.78979	2.62577e-07	2.21051	1.60535e-13	significant	VPS9D1 antisense RNA 1
ENSG00000112033	PPARD	1.78851	1.37714e-29	1.21918	6.92655e-07	significant	peroxisome proliferator activated receptor delta
ENSG00000113742	CPEB4	1.78568	8.38168e-20	1.78248	1.19421e-13	significant	cytoplasmic polyadenylation element binding protein 4
ENSG00000100522	GNPNAT1	1.78517	1.63459e-65	1.6281	1.96779e-28	significant	glucosamine-phosphate N-acetyltransferase 1
ENSG00000224126		1.7844	0.00627252	1.23952	0.0124819	significant
ENSG00000077684	JADE1	1.78399	2.22409e-20	1.8524	2.0102e-25	significant	jade family PHD finger 1
ENSG00000130720	FIBCD1	1.7763	1.52098e-18	1.731	1.09745e-09	significant	fibrinogen C domain containing 1
ENSG00000187605	TET3	1.77118	1.66923e-09	0.450638	0.120402	not_significant	tet methylcytosine dioxygenase 3
ENSG00000247626	MARS2	1.77005	2.34486e-17	1.35317	1.58586e-12	significant	methionyl-tRNA synthetase 2, mitochondrial
ENSG00000049192	ADAMTS6	1.76849	2.65742e-07	1.70784	8.77258e-23	significant	ADAM metallopeptidase with thrombospondin type 1 motif 6
ENSG00000166471	TMEM41B	1.76631	2.47183e-09	1.81331	3.739e-09	significant	transmembrane protein 41B
ENSG00000270067		1.76546	6.23279e-06	0.563854	0.390067	not_significant
ENSG00000118689	FOXO3	1.76525	6.23576e-20	1.82191	6.41569e-17	significant	forkhead box O3
ENSG00000221866	PLXNA4	1.76406	8.2833e-13	2.15728	2.45396e-10	significant	plexin A4
ENSG00000078401	EDN1	1.75841	8.71267e-06	2.17855	4.72952e-07	significant	endothelin 1
ENSG00000095637	SORBS1	1.75298	0.0148936	0.885715	0.0127018	significant	sorbin and SH3 domain containing 1
ENSG00000151617	EDNRA	1.75285	1.84179e-10	1.19537	0.000415414	significant	endothelin receptor type A
ENSG00000052749	RRP12	1.75216	1.82155e-25	1.38103	1.25093e-08	significant	ribosomal RNA processing 12 homolog
ENSG00000163697	APBB2	1.75136	6.57746e-35	1.32358	1.23443e-33	significant	amyloid beta precursor protein binding family B member 2
ENSG00000073008	PVR	1.74876	4.17917e-33	1.52918	2.04571e-11	significant	PVR cell adhesion molecule
ENSG00000147509	RGS20	1.74679	1.88478e-06	1.58776	0.00076188	significant	regulator of G protein signaling 20
ENSG00000138166	DUSP5	1.74669	1.71917e-07	1.16907	0.000406072	significant	dual specificity phosphatase 5
ENSG00000231290	APCDD1L-DT	1.74382	1.09844e-17	1.38427	0.00148618	significant	APCDD1L divergent transcript
ENSG00000251322	SHANK3	1.74273	1.7499e-35	1.48058	1.74567e-17	significant	SH3 and multiple ankyrin repeat domains 3
ENSG00000102359	SRPX2	1.74173	6.6786e-11	1.16527	2.74392e-11	significant	sushi repeat containing protein X-linked 2
ENSG00000166922	SCG5	1.74159	1.1676e-10	1.1015	2.90742e-05	significant	secretogranin V
ENSG00000130844	ZNF331	1.73931	3.61438e-08	1.3546	0.0974339	not_significant	zinc finger protein 331
ENSG00000175505	CLCF1	1.73826	2.40683e-07	2.30988	1.70189e-15	significant	cardiotrophin like cytokine factor 1
ENSG00000241945	PWP2	1.73655	0.00032449	1.41857	0.00256463	significant	PWP2 small subunit processome component
ENSG00000131634	TMEM204	1.73593	1.92396e-17	1.65895	7.3244e-23	significant	transmembrane protein 204
ENSG00000183496	MEX3B	1.73173	0.0221641	1.08029	0.0188971	significant	mex-3 RNA binding family member B
ENSG00000134986	NREP	1.71763	1.59594e-23	1.63436	1.04601e-05	significant	neuronal regeneration related protein
ENSG00000103647	CORO2B	1.71404	1.81629e-10	1.32377	2.00177e-05	significant	coronin 2B
ENSG00000082126	MPP4	1.71378	2.5106e-06	1.47382	3.85915e-06	significant	membrane palmitoylated protein 4
ENSG00000153046	CDYL	1.7095	4.64305e-29	1.21357	1.55017e-16	significant	chromodomain Y like
ENSG00000136052	SLC41A2	1.70867	1.36063e-08	1.49507	6.74021e-10	significant	solute carrier family 41 member 2
ENSG00000258186		1.70372	0.0474668	2.03772	0.0721363	not_significant
ENSG00000149380	P4HA3	1.70252	0.000776094	1.79127	0.00017724	significant	prolyl 4-hydroxylase subunit alpha 3
ENSG00000227036	LINC00511	1.6866	0.000375797	0.562261	0.181195	not_significant	long intergenic non-protein coding RNA 511
ENSG00000143013	LMO4	1.68473	5.19418e-15	1.50713	1.17538e-08	significant	LIM domain only 4
ENSG00000068366	ACSL4	1.68196	6.19248e-32	1.72075	2.4931e-20	significant	acyl-CoA synthetase long chain family member 4
ENSG00000113296	THBS4	1.66894	0.0104229	0.981827	0.0435438	significant	thrombospondin 4
ENSG00000143797	MBOAT2	1.6688	4.22225e-108	1.4178	1.06761e-19	significant	membrane bound O-acyltransferase domain containing 2
ENSG00000165801	ARHGEF40	1.66676	3.03915e-51	1.56454	2.80933e-22	significant	Rho guanine nucleotide exchange factor 40
ENSG00000138685	FGF2	1.66568	2.26872e-17	1.95269	9.59102e-09	significant	fibroblast growth factor 2
ENSG00000119681	LTBP2	1.66117	3.13968e-15	1.23278	0.00026221	significant	latent transforming growth factor beta binding protein 2
ENSG00000198768	APCDD1L	1.66079	9.15375e-19	1.22563	0.00694161	significant	APC down-regulated 1 like
ENSG00000122644	ARL4A	1.66001	2.30844e-19	1.17584	0.000646002	significant	ADP ribosylation factor like GTPase 4A
ENSG00000148848	ADAM12	1.65802	1.75915e-17	1.26927	1.70282e-17	significant	ADAM metallopeptidase domain 12
ENSG00000142207	URB1	1.65689	3.19202e-18	1.1101	3.23404e-19	significant	URB1 ribosome biogenesis homolog
ENSG00000145220	LYAR	1.65381	8.03878e-13	1.48328	6.80543e-11	significant	Ly1 antibody reactive
ENSG00000171161	ZNF672	1.6487	1.22524e-29	1.39529	2.12639e-16	significant	zinc finger protein 672
ENSG00000143507	DUSP10	1.64548	6.17233e-12	2.00937	2.65211e-14	significant	dual specificity phosphatase 10
ENSG00000145990	GFOD1	1.64508	8.04433e-09	0.718117	0.00303357	significant	glucose-fructose oxidoreductase domain containing 1
ENSG00000010310	GIPR	1.6409	0.000471802	0.227602	0.79988	not_significant	gastric inhibitory polypeptide receptor
ENSG00000161791	FMNL3	1.63604	1.61163e-33	1.50119	4.72136e-63	significant	formin like 3
ENSG00000135763	URB2	1.63441	4.20682e-21	1.2429	4.429e-07	significant	URB2 ribosome biogenesis homolog
ENSG00000151474	FRMD4A	1.6323	1.85146e-12	1.37011	1.7442e-10	significant	FERM domain containing 4A
ENSG00000177425	PAWR	1.63148	1.21998e-09	1.00949	0.00628306	significant	pro-apoptotic WT1 regulator
ENSG00000155438	NIFK	1.62861	2.83557e-22	1.35763	1.24783e-17	significant	nucleolar protein interacting with the FHA domain of MKI67
ENSG00000079308	TNS1	1.6283	1.68812e-24	1.49222	6.78039e-30	significant	tensin 1
ENSG00000241697	TMEFF1	1.6274	1.80678e-07	0.790048	0.241817	not_significant	transmembrane protein with EGF like and two follistatin like domains 1
ENSG00000006459	KDM7A	1.62205	7.95932e-06	1.45409	0.00358077	significant	lysine demethylase 7A
ENSG00000114268	PFKFB4	1.60952	4.88595e-14	1.01714	0.0354536	significant	6-phosphofructo-2-kinase/fructose-2,6-biphosphatase 4
ENSG00000040275	SPDL1	1.60698	1.67135e-32	1.22896	2.42303e-05	significant	spindle apparatus coiled-coil protein 1
ENSG00000232956	SNHG15	1.60651	1.81186e-13	1.20601	2.83933e-07	significant	small nucleolar RNA host gene 15
ENSG00000107937	GTPBP4	1.60372	1.96018e-27	1.54305	3.90263e-28	significant	GTP binding protein 4
ENSG00000133657	ATP13A3	1.60325	2.38701e-14	1.68245	4.53873e-15	significant	ATPase 13A3
ENSG00000070495	JMJD6	1.59921	9.21219e-14	1.70202	9.27406e-09	significant	jumonji domain containing 6, arginine demethylase and lysine hydroxylase
ENSG00000160072	ATAD3B	1.59791	3.93048e-26	1.36368	1.50804e-13	significant	ATPase family AAA domain containing 3B
ENSG00000128059	PPAT	1.59689	2.67724e-12	1.26271	2.54708e-06	significant	phosphoribosyl pyrophosphate amidotransferase
ENSG00000128656	CHN1	1.59659	1.50898e-15	1.18543	1.53454e-06	significant	chimerin 1
ENSG00000131018	SYNE1	1.59509	4.25186e-21	0.928204	8.89115e-06	significant	spectrin repeat containing nuclear envelope protein 1
ENSG00000175137	SH3BP5L	1.59226	1.07179e-17	1.47528	1.92678e-25	significant	SH3 binding domain protein 5 like
ENSG00000059758	CDK17	1.5898	6.60263e-39	1.47603	2.08825e-11	significant	cyclin dependent kinase 17
ENSG00000134775	FHOD3	1.58918	0.000328156	2.30592	5.44203e-08	significant	formin homology 2 domain containing 3
ENSG00000139372	TDG	1.58865	2.59791e-23	1.26087	2.34172e-11	significant	thymine DNA glycosylase
ENSG00000203761		1.58544	0.000607779	1.26963	0.0232322	significant
ENSG00000103404	USP31	1.58495	4.72461e-13	1.27852	1.92205e-08	significant	ubiquitin specific peptidase 31
ENSG00000105497	ZNF175	1.5843	2.86551e-22	1.72331	4.23196e-25	significant	zinc finger protein 175
ENSG00000157557	ETS2	1.58412	3.19178e-08	0.806226	0.00018325	significant	ETS proto-oncogene 2, transcription factor
ENSG00000054965	FAM168A	1.58101	7.04684e-60	0.928312	7.99803e-32	significant	family with sequence similarity 168 member A
ENSG00000135905	DOCK10	1.58066	2.60461e-05	1.54369	9.93346e-07	significant	dedicator of cytokinesis 10
ENSG00000233225		1.57839	0.000452368	1.52847	0.000338284	significant
ENSG00000015568	RGPD5	1.57483	0.0170703	-0.76473	0.208969	not_significant	RANBP2 like and GRIP domain containing 5
ENSG00000164933	SLC25A32	1.57378	2.40246e-32	1.31465	4.05607e-13	significant	solute carrier family 25 member 32
ENSG00000196843	ARID5A	1.57168	6.7718e-14	1.21995	1.04564e-05	significant	AT-rich interaction domain 5A
ENSG00000273350		1.5713	0.0178048	2.6497	0.00714104	significant
ENSG00000053372	MRTO4	1.56801	3.21554e-19	1.19169	2.00706e-08	significant	MRT4 homolog, ribosome maturation factor
ENSG00000196072	BLOC1S2	1.56247	1.96585e-23	1.36523	5.8813e-14	significant	biogenesis of lysosomal organelles complex 1 subunit 2
ENSG00000104131	EIF3J	1.56195	2.31487e-20	1.19033	7.41306e-13	significant	eukaryotic translation initiation factor 3 subunit J
ENSG00000167695	FAM57A	1.56146	2.45703e-13	1.30303	1.1781e-12	significant	family with sequence similarity 57 member A
ENSG00000157654	PALM2-AKAP2	1.56017	1.97182e-06	1.63516	6.49639e-15	significant	PALM2-AKAP2 readthrough
ENSG00000128228	SDF2L1	1.55809	4.01178e-11	1.72524	9.81423e-06	significant	stromal cell derived factor 2 like 1
ENSG00000147100	SLC16A2	1.55643	9.75276e-24	0.855579	1.89417e-12	significant	solute carrier family 16 member 2
ENSG00000139146	SINHCAF	1.55246	5.5627e-15	1.25465	4.85971e-07	significant	SIN3-HDAC complex associated factor
ENSG00000183963	SMTN	1.54919	5.11664e-19	1.74398	7.66078e-23	significant	smoothelin
ENSG00000144118	RALB	1.5487	2.16411e-33	1.74517	4.89774e-41	significant	RAS like proto-oncogene B
ENSG00000114251	WNT5A	1.54847	3.47284e-10	0.948027	0.000460296	significant	Wnt family member 5A
ENSG00000224080		1.54706	0.000130878	1.88748	9.35292e-05	significant
ENSG00000239948		1.54426	0.0140866	1.13775	0.183095	not_significant
ENSG00000274818		1.54232	0.0305785	0.0930671	0.922612	not_significant
ENSG00000088826	SMOX	1.5406	4.59401e-05	2.32562	4.39632e-09	significant	spermine oxidase
ENSG00000211455	STK38L	1.54058	0.00212845	2.31174	6.69419e-06	significant	serine/threonine kinase 38 like
ENSG00000148459	PDSS1	1.53731	2.03247e-09	1.11841	5.93041e-05	significant	decaprenyl diphosphate synthase subunit 1
ENSG00000103449	SALL1	1.53598	3.35657e-52	1.35709	1.64662e-09	significant	spalt like transcription factor 1
ENSG00000010818	HIVEP2	1.53474	1.41733e-17	1.42682	1.397e-14	significant	human immunodeficiency virus type I enhancer binding protein 2
ENSG00000134871	COL4A2	1.53382	8.70395e-08	0.893964	0.000139434	significant	collagen type IV alpha 2 chain
ENSG00000132603	NIP7	1.53348	1.7597e-18	1.36739	8.06379e-14	significant	nucleolar pre-rRNA processing protein NIP7
ENSG00000221955	SLC12A8	1.53343	7.0806e-06	0.744582	0.0425075	significant	solute carrier family 12 member 8
ENSG00000115946	PNO1	1.53176	5.87936e-22	1.36832	2.44185e-09	significant	partner of NOB1 homolog
ENSG00000099810	MTAP	1.53049	1.25995e-27	1.66421	4.66183e-18	significant	methylthioadenosine phosphorylase
ENSG00000096696	DSP	1.52932	8.51037e-14	2.27491	1.11199e-23	significant	desmoplakin
ENSG00000130826	DKC1	1.52158	1.29516e-25	1.35977	5.97343e-24	significant	dyskerin pseudouridine synthase 1
ENSG00000234231		1.52147	1.18846e-23	1.42976	2.85978e-09	significant
ENSG00000185947	ZNF267	1.51935	1.57667e-07	1.31124	1.07798e-07	significant	zinc finger protein 267
ENSG00000196371	FUT4	1.51781	3.95809e-16	1.36453	9.10629e-12	significant	fucosyltransferase 4
ENSG00000130204	TOMM40	1.51725	6.63169e-16	1.43263	5.7134e-12	significant	translocase of outer mitochondrial membrane 40
ENSG00000080608	PUM3	1.51564	4.19689e-24	1.2796	4.78706e-15	significant	pumilio RNA binding family member 3
ENSG00000163811	WDR43	1.51472	6.48844e-23	1.25272	2.71805e-15	significant	WD repeat domain 43
ENSG00000244165	P2RY11	1.51103	4.6043e-11	0.834012	0.000528263	significant	purinergic receptor P2Y11
ENSG00000106683	LIMK1	1.50582	2.32934e-15	1.45439	1.48173e-17	significant	LIM domain kinase 1
ENSG00000223612		1.50581	0.0437064	0.562773	0.370311	not_significant
ENSG00000273398		1.50225	0.000108582	0.58156	0.160635	not_significant
ENSG00000125618	PAX8	1.502	0.00091675	0.367439	0.225249	not_significant	paired box 8
ENSG00000140332	TLE3	1.50153	2.46421e-14	1.0884	3.46945e-05	significant	TLE family member 3, transcriptional corepressor
ENSG00000272669		1.5015	0.00784196	0.806774	0.339382	not_significant
ENSG00000177192	PUS1	1.50108	1.06057e-10	1.41676	6.28686e-17	significant	pseudouridine synthase 1
ENSG00000166446	CDYL2	1.50032	7.07629e-33	1.02436	3.07525e-13	significant	chromodomain Y like 2
ENSG00000119771	KLHL29	1.49415	3.10433e-10	1.47505	3.45502e-20	significant	kelch like family member 29
ENSG00000159216	RUNX1	1.49294	4.4331e-09	1.77051	3.01778e-10	significant	RUNX family transcription factor 1
ENSG00000110104	CCDC86	1.49214	2.24347e-08	1.32696	3.62234e-11	significant	coiled-coil domain containing 86
ENSG00000118263	KLF7	1.48891	3.04678e-09	1.24256	2.47641e-06	significant	Kruppel like factor 7
ENSG00000160193	WDR4	1.48858	1.00629e-11	1.30732	1.01655e-08	significant	WD repeat domain 4
ENSG00000183386	FHL3	1.48824	2.933e-06	1.30249	9.82004e-06	significant	four and a half LIM domains 3
ENSG00000271020		1.48818	0.0028897	1.73776	4.68584e-05	significant
ENSG00000163110	PDLIM5	1.48503	2.64034e-12	1.35162	2.65692e-09	significant	PDZ and LIM domain 5
ENSG00000184292	TACSTD2	1.48337	0.0109136	1.51009	0.127435	not_significant	tumor associated calcium signal transducer 2
ENSG00000174945	AMZ1	1.4821	0.00214958	1.50075	0.0276959	significant	archaelysin family metallopeptidase 1
ENSG00000006016	CRLF1	1.48183	1.83202e-18	1.05373	0.000370243	significant	cytokine receptor like factor 1
ENSG00000152894	PTPRK	1.48143	3.47096e-39	1.02363	1.50223e-30	significant	protein tyrosine phosphatase receptor type K
ENSG00000196756	SNHG17	1.48098	5.56943e-19	1.06838	7.62917e-14	significant	small nucleolar RNA host gene 17
ENSG00000112578	BYSL	1.4764	4.13581e-24	1.30267	6.77585e-17	significant	bystin like
ENSG00000267436		1.47179	0.00877903	1.09451	0.0880464	not_significant
ENSG00000273568		1.47174	0.016367	1.74174	0.000342247	significant
ENSG00000279095		1.46973	2.94799e-11	1.44519	2.24661e-05	significant
ENSG00000075340	ADD2	1.46932	6.32585e-05	0.769637	0.151538	not_significant	adducin 2
ENSG00000271643		1.46825	2.62475e-07	0.908057	0.00197188	significant
ENSG00000033867	SLC4A7	1.46712	3.05734e-17	1.80926	9.90258e-22	significant	solute carrier family 4 member 7
ENSG00000080493	SLC4A4	1.46241	2.35734e-07	1.69984	9.30896e-08	significant	solute carrier family 4 member 4
ENSG00000175352	NRIP3	1.45973	4.20717e-10	1.24025	0.000327713	significant	nuclear receptor interacting protein 3
ENSG00000067955	CBFB	1.45822	1.07428e-09	1.48039	1.31048e-09	significant	core-binding factor subunit beta
ENSG00000198440	ZNF583	1.45695	2.50225e-10	0.860703	0.00274518	significant	zinc finger protein 583
ENSG00000107815	TWNK	1.45221	1.69792e-19	1.05649	2.87862e-10	significant	twinkle mtDNA helicase
ENSG00000261236	BOP1	1.45036	1.74177e-14	1.2329	5.72733e-27	significant	BOP1 ribosomal biogenesis factor
ENSG00000248587		1.44868	3.7794e-06	2.88804	6.49639e-15	significant
ENSG00000135269	TES	1.44821	7.79547e-08	1.80407	1.97666e-13	significant	testin LIM domain protein
ENSG00000102452	NALCN	1.44686	1.72785e-10	0.180556	0.751077	not_significant	sodium leak channel, non-selective
ENSG00000101361	NOP56	1.44204	2.16508e-15	1.15015	4.82505e-11	significant	NOP56 ribonucleoprotein
ENSG00000275464	LOC102724159	1.44125	9.15594e-14	1.13844	3.30419e-24	significant	periodic tryptophan protein 2 homolog
ENSG00000186480	INSIG1	1.44122	0.0281518	1.04201	0.0175968	significant	insulin induced gene 1
ENSG00000154217	PITPNC1	1.43926	0.000111909	1.52144	0.000217633	significant	phosphatidylinositol transfer protein cytoplasmic 1
ENSG00000152217	SETBP1	1.4315	2.86232e-09	1.40691	1.6236e-13	significant	SET binding protein 1
ENSG00000065911	MTHFD2	1.4293	0.00066856	0.4273	0.473925	not_significant	methylenetetrahydrofolate dehydrogenase (NADP+ dependent) 2, methenyltetrahydrofolate cyclohydrolase
ENSG00000176887	SOX11	1.42701	2.66122e-07	-0.617981		not_significant	SRY-box 11
ENSG00000164309	CMYA5	1.42618	1.01793e-06	0.393795	0.0451366	significant	cardiomyopathy associated 5
ENSG00000198018	ENTPD7	1.42086	2.07028e-13	1.64361	9.12473e-15	significant	ectonucleoside triphosphate diphosphohydrolase 7
ENSG00000136928	GABBR2	1.41868	0.000127696	1.50945	0.000205319	significant	gamma-aminobutyric acid type B receptor subunit 2
ENSG00000234380	LINC01426	1.41727	0.000231312	1.64051	0.000443787	significant	long intergenic non-protein coding RNA 1426
ENSG00000166592	RRAD	1.41708	0.00623349	0.738172	0.187269	not_significant	RRAD, Ras related glycolysis inhibitor and calcium channel regulator
ENSG00000205339	IPO7	1.41451	2.25095e-29	1.39997	5.43283e-15	significant	importin 7
ENSG00000112245	PTP4A1	1.41345	6.2787e-12	1.74887	3.03266e-07	significant	protein tyrosine phosphatase 4A1
ENSG00000181649	PHLDA2	1.41261	7.35043e-07	1.86238	3.57792e-18	significant	pleckstrin homology like domain family A member 2
ENSG00000006327	TNFRSF12A	1.41016	5.38672e-11	1.45937	1.03483e-39	significant	TNF receptor superfamily member 12A
ENSG00000120156	TEK	1.40774	0.00174904	1.61335	0.00206205	significant	TEK receptor tyrosine kinase
ENSG00000182158	CREB3L2	1.40457	1.51869e-15	1.50181	3.78756e-24	significant	cAMP responsive element binding protein 3 like 2
ENSG00000160460	SPTBN4	1.40303	2.31735e-05	-0.562081	0.281474	not_significant	spectrin beta, non-erythrocytic 4
ENSG00000019144	PHLDB1	1.40218	3.42408e-17	1.69666	4.65947e-14	significant	pleckstrin homology like domain family B member 1
ENSG00000228649		1.40136	3.55376e-09	0.610933	0.0773656	not_significant
ENSG00000123496	IL13RA2	1.39996	0.0169262	0.649622	0.258073	not_significant	interleukin 13 receptor subunit alpha 2
ENSG00000012061	ERCC1	1.39937	1.28242e-24	1.0036	2.71403e-10	significant	ERCC excision repair 1, endonuclease non-catalytic subunit
ENSG00000108179	PPIF	1.39589	1.66188e-08	0.596819	5.93977e-09	significant	peptidylprolyl isomerase F
ENSG00000137193	PIM1	1.39547	0.00171621	1.38533	5.25511e-05	significant	Pim-1 proto-oncogene, serine/threonine kinase
ENSG00000197498	RPF2	1.39394	3.49343e-17	1.03343	3.3111e-08	significant	ribosome production factor 2 homolog
ENSG00000143751	SDE2	1.38865	1.56103e-21	1.1984	4.44308e-10	significant	SDE2 telomere maintenance homolog
ENSG00000111641	NOP2	1.38781	2.81887e-13	1.142	5.96509e-16	significant	NOP2 nucleolar protein
ENSG00000099331	MYO9B	1.38703	3.38649e-29	1.41377	1.6495e-32	significant	myosin IXB
ENSG00000155380	SLC16A1	1.38609	1.77645e-23	1.16508	7.9478e-10	significant	solute carrier family 16 member 1
ENSG00000138018	SELENOI	1.38542	4.19347e-41	1.13323	2.66893e-07	significant	selenoprotein I
ENSG00000169991	IFFO2	1.3798	0.00026273	1.14433	0.000875914	significant	intermediate filament family orphan 2
ENSG00000115875	SRSF7	1.37973	2.5002e-17	1.08503	1.55733e-08	significant	serine and arginine rich splicing factor 7
ENSG00000233621	LINC01137	1.3777	1.31213e-05	0.720908	0.0504038	not_significant	long intergenic non-protein coding RNA 1137
ENSG00000126953	TIMM8A	1.37721	1.00304e-10	0.923513	2.86707e-05	significant	translocase of inner mitochondrial membrane 8A
ENSG00000120694	HSPH1	1.377	3.63955e-11	1.10388	5.12207e-05	significant	heat shock protein family H (Hsp110) member 1
ENSG00000108854	SMURF2	1.37566	5.08016e-05	1.66662	9.37154e-11	significant	SMAD specific E3 ubiquitin protein ligase 2
ENSG00000164300	SERINC5	1.37393	2.95138e-11	1.15597	2.33441e-18	significant	serine incorporator 5
ENSG00000145685	LHFPL2	1.37379	0.00261055	1.34451	0.00396935	significant	LHFPL tetraspan subfamily member 2
ENSG00000115598	IL1RL2	1.37353	0.000908542	0.967417	0.00626682	significant	interleukin 1 receptor like 2
ENSG00000169902	TPST1	1.37159	6.65275e-09	1.53305	1.85193e-17	significant	tyrosylprotein sulfotransferase 1
ENSG00000172738	TMEM217	1.37157	0.00114437	1.82132	9.80495e-07	significant	transmembrane protein 217
ENSG00000140416	TPM1	1.37077	4.9624e-11	1.54677	1.90347e-07	significant	tropomyosin 1
ENSG00000148516	ZEB1	1.37008	1.45769e-37	0.800245	3.50691e-07	significant	zinc finger E-box binding homeobox 1
ENSG00000166197	NOLC1	1.36928	2.76986e-20	1.07927	1.01051e-08	significant	nucleolar and coiled-body phosphoprotein 1
ENSG00000279227		1.36901	0.000169665	0.0478948	0.936672	not_significant
ENSG00000081320	STK17B	1.36857	6.1633e-14	0.762176	0.018069	significant	serine/threonine kinase 17b
ENSG00000127328	RAB3IP	1.36849	2.13716e-05	1.0939	0.0302187	significant	RAB3A interacting protein
ENSG00000197961	ZNF121	1.36574	2.33682e-15	0.738191	0.000199904	significant	zinc finger protein 121
ENSG00000132661	NXT1	1.36172	1.23464e-13	0.964348	8.68477e-05	significant	nuclear transport factor 2 like export factor 1
ENSG00000151693	ASAP2	1.36093	6.63289e-11	1.40551	7.13363e-19	significant	ArfGAP with SH3 domain, ankyrin repeat and PH domain 2
ENSG00000044574	HSPA5	1.36029	5.33154e-11	1.72927	0.000337072	significant	heat shock protein family A (Hsp70) member 5
ENSG00000125551	PLGLB2	1.3599	1.42373e-05	0.937312	0.0461537	significant	plasminogen like B2
ENSG00000065413	ANKRD44	1.35954	1.67539e-06	1.73992	2.21796e-09	significant	ankyrin repeat domain 44
ENSG00000102531	FNDC3A	1.35926	2.1057e-10	1.50814	2.67023e-11	significant	fibronectin type III domain containing 3A
ENSG00000153815	CMIP	1.35729	4.13734e-16	1.22519	1.81648e-11	significant	c-Maf inducing protein
ENSG00000136261	BZW2	1.35694	2.98235e-17	1.14043	1.13902e-10	significant	basic leucine zipper and W2 domains 2
ENSG00000143256	PFDN2	1.35474	3.11126e-23	1.12862	1.30108e-19	significant	prefoldin subunit 2
ENSG00000197461	PDGFA	1.35352	0.0269005	2.61741	9.39253e-10	significant	platelet derived growth factor subunit A
ENSG00000109814	UGDH	1.35322	7.58025e-27	1.41671	2.89218e-25	significant	UDP-glucose 6-dehydrogenase
ENSG00000110987	BCL7A	1.35094	0.000272871	1.66765	2.85253e-06	significant	BAF chromatin remodeling complex subunit BCL7A
ENSG00000271303	SRXN1	1.35088	4.22599e-13	1.0315	0.000961246	significant	sulfiredoxin 1
ENSG00000147065	MSN	1.35075	2.42895e-17	1.2229	2.68515e-15	significant	moesin
ENSG00000249859	PVT1	1.35025	2.75371e-18	1.13591	3.20883e-11	significant	Pvt1 oncogene
ENSG00000074590	NUAK1	1.34951	0.00360191	2.02715	1.13507e-08	significant	NUAK family kinase 1
ENSG00000164211	STARD4	1.34906	0.0209128	1.44166	2.43261e-05	significant	StAR related lipid transfer domain containing 4
ENSG00000109917	ZPR1	1.34854	2.29112e-17	1.24526	1.16166e-19	significant	ZPR1 zinc finger
ENSG00000258425		1.34823	0.0484944	0.836861	0.242059	not_significant
ENSG00000006451	RALA	1.34815	6.61355e-39	1.26045	6.22229e-18	significant	RAS like proto-oncogene A
ENSG00000115758	ODC1	1.34788	5.08643e-08	0.789095	1.23562e-06	significant	ornithine decarboxylase 1
ENSG00000140564	FURIN	1.34537	3.72288e-32	1.15709	2.23842e-27	significant	furin, paired basic amino acid cleaving enzyme
ENSG00000124831	LRRFIP1	1.34466	3.45787e-13	1.35941	2.48817e-16	significant	LRR binding FLII interacting protein 1
ENSG00000116679	IVNS1ABP	1.3441	3.09843e-21	0.817728	3.207e-05	significant	influenza virus NS1A binding protein
ENSG00000151576	QTRT2	1.34131	5.94616e-21	0.897433	2.82203e-06	significant	queuine tRNA-ribosyltransferase accessory subunit 2
ENSG00000115844	DLX2	1.34117	0.0106911	1.90026	0.000365909	significant	distal-less homeobox 2
ENSG00000175040	CHST2	1.34099	3.62354e-05	0.972088	0.0069243	significant	carbohydrate sulfotransferase 2
ENSG00000011198	ABHD5	1.34038	8.68407e-12	0.872116	7.13879e-05	significant	abhydrolase domain containing 5
ENSG00000109519	GRPEL1	1.33745	7.50771e-15	1.18371	8.28069e-19	significant	GrpE like 1, mitochondrial
ENSG00000163874	ZC3H12A	1.33367	0.00264212	0.816689	0.0278528	significant	zinc finger CCCH-type containing 12A
ENSG00000160818	GPATCH4	1.33269	4.65799e-11	1.21203	1.60391e-09	significant	G-patch domain containing 4
ENSG00000156136	DCK	1.32905	2.7786e-11	1.32389	1.43434e-05	significant	deoxycytidine kinase
ENSG00000011007	ELOA	1.32841	4.52085e-23	1.12742	7.02995e-24	significant	elongin A
ENSG00000166825	ANPEP	1.32784	3.58843e-05	1.4038	3.35165e-14	significant	alanyl aminopeptidase, membrane
ENSG00000101333	PLCB4	1.32563	8.32465e-15	1.30328	7.95983e-08	significant	phospholipase C beta 4
ENSG00000136158	SPRY2	1.32529	8.19671e-05	1.23762	0.000158122	significant	sprouty RTK signaling antagonist 2
ENSG00000101194	SLC17A9	1.32451	5.3267e-21	1.494	4.75978e-10	significant	solute carrier family 17 member 9
ENSG00000198517	MAFK	1.32323	8.89019e-08	1.63979	8.63183e-07	significant	MAF bZIP transcription factor K
ENSG00000073711	PPP2R3A	1.3207	5.36299e-16	1.16687	5.7758e-12	significant	protein phosphatase 2 regulatory subunit B''alpha
ENSG00000180667	YOD1	1.3204	1.27998e-11	1.20373	1.02388e-15	significant	YOD1 deubiquitinase
ENSG00000213853	EMP2	1.31894	2.17156e-08	1.54142	2.64039e-05	significant	epithelial membrane protein 2
ENSG00000107338	SHB	1.31724	1.39753e-15	1.1397	6.71204e-24	significant	SH2 domain containing adaptor protein B
ENSG00000157064	NMNAT2	1.31544	1.64447e-08	0.960158	0.00197428	significant	nicotinamide nucleotide adenylyltransferase 2
ENSG00000104885	DOT1L	1.31515	2.02938e-05	1.07635	0.000528269	significant	DOT1 like histone lysine methyltransferase
ENSG00000055044	NOP58	1.31441	1.13944e-33	0.996764	2.91645e-07	significant	NOP58 ribonucleoprotein
ENSG00000197451	HNRNPAB	1.31406	9.59548e-15	1.27458	5.99997e-10	significant	heterogeneous nuclear ribonucleoprotein A/B
ENSG00000122863	CHST3	1.31327	2.86403e-09	1.10151	4.41712e-09	significant	carbohydrate sulfotransferase 3
ENSG00000067177	PHKA1	1.31153	0.0011854	1.53549	0.000389394	significant	phosphorylase kinase regulatory subunit alpha 1
ENSG00000104635	SLC39A14	1.31055	1.07086e-06	1.40026	5.13046e-11	significant	solute carrier family 39 member 14
ENSG00000122694	GLIPR2	1.31013	2.61907e-16	1.24248	1.35115e-12	significant	GLI pathogenesis related 2
ENSG00000148843	PDCD11	1.30957	5.93136e-14	1.10648	2.69657e-11	significant	programmed cell death 11
ENSG00000255717	SNHG1	1.30807	7.26443e-08	0.707712	0.00511739	significant	small nucleolar RNA host gene 1
ENSG00000186594	MIR22HG	1.30612	7.40526e-10	1.44185	1.07443e-06	significant	MIR22 host gene
ENSG00000165338	HECTD2	1.30587	5.91054e-15	1.29209	1.45312e-06	significant	HECT domain E3 ubiquitin protein ligase 2
ENSG00000166503	HDGFL3	1.30485	4.15359e-18	1.50085	1.83512e-24	significant	HDGF like 3
ENSG00000257553		1.30332	0.00377725	0.645482	0.213964	not_significant
ENSG00000149633	KIAA1755	1.30226	5.30484e-06	2.19264	9.67826e-09	significant	KIAA1755
ENSG00000163743	RCHY1	1.30052	8.77542e-22	0.374023	0.0375744	significant	ring finger and CHY zinc finger domain containing 1
ENSG00000124208	TMEM189-UBE2V1	1.2983	0.000141853	1.19966	1.60428e-10	significant	TMEM189-UBE2V1 readthrough
ENSG00000147224	PRPS1	1.29302	2.67723e-14	1.54434	9.35986e-09	significant	phosphoribosyl pyrophosphate synthetase 1
ENSG00000076356	PLXNA2	1.29274	2.28419e-05	0.955266	0.000746803	significant	plexin A2
ENSG00000198053	SIRPA	1.29269	1.6474e-11	0.898518	9.97318e-05	significant	signal regulatory protein alpha
ENSG00000151247	EIF4E	1.29262	4.14354e-17	1.24469	2.63846e-11	significant	eukaryotic translation initiation factor 4E
ENSG00000224032		1.291	4.38085e-10	1.41519	7.08295e-13	significant
ENSG00000132382	MYBBP1A	1.29048	6.42937e-18	1.16903	9.09218e-18	significant	MYB binding protein 1a
ENSG00000059377	TBXAS1	1.28834	0.00215394	0.772613	0.386778	not_significant	thromboxane A synthase 1
ENSG00000163938	GNL3	1.28667	9.00638e-27	1.1391	4.32825e-11	significant	G protein nucleolar 3
ENSG00000072133	RPS6KA6	1.28631	4.70637e-05	1.07058	0.0087723	significant	ribosomal protein S6 kinase A6
ENSG00000073921	PICALM	1.28399	1.46305e-13	1.24815	3.8198e-09	significant	phosphatidylinositol binding clathrin assembly protein
ENSG00000069869	NEDD4	1.2836	3.88115e-13	1.02674	8.07589e-10	significant	NEDD4 E3 ubiquitin protein ligase
ENSG00000182831	C16orf72	1.28355	2.20568e-08	0.98898	7.41921e-07	significant	chromosome 16 open reading frame 72
ENSG00000170027	YWHAG	1.28274	2.29629e-28	1.19304	1.83512e-24	significant	tyrosine 3-monooxygenase/tryptophan 5-monooxygenase activation protein gamma
ENSG00000183853	KIRREL1	1.27533	8.55689e-12	0.926911	2.74831e-13	significant	kirre like nephrin family adhesion molecule 1
ENSG00000150990	DHX37	1.27362	7.99147e-08	1.01934	9.90225e-07	significant	DEAH-box helicase 37
ENSG00000109534	GAR1	1.27064	5.4442e-15	0.945867	1.02052e-05	significant	GAR1 ribonucleoprotein
ENSG00000197415	VEPH1	1.27005	3.23354e-06	1.1813	2.35888e-07	significant	ventricular zone expressed PH domain containing 1
ENSG00000109320	NFKB1	1.26991	6.28376e-11	0.481253	0.00237629	significant	nuclear factor kappa B subunit 1
ENSG00000163602	RYBP	1.26977	9.41168e-05	0.940329	7.64792e-05	significant	RING1 and YY1 binding protein
ENSG00000137124	ALDH1B1	1.264	3.71688e-06	0.99426	0.000219293	significant	aldehyde dehydrogenase 1 family member B1
ENSG00000254093	PINX1	1.26371	1.81814e-12	0.970289	3.73114e-06	significant	PIN2 (TERF1) interacting telomerase inhibitor 1
ENSG00000113716	HMGXB3	1.2637	7.33781e-31	0.900345	3.24908e-09	significant	HMG-box containing 3
ENSG00000205277	MUC12	1.26323	0.0117957	1.04332	0.12041	not_significant	mucin 12, cell surface associated
ENSG00000160214	RRP1	1.26023	1.67093e-15	1.03443	7.88091e-13	significant	ribosomal RNA processing 1
ENSG00000132361	CLUH	1.25752	9.33509e-11	1.06006	2.90387e-09	significant	clustered mitochondria homolog
ENSG00000142149	HUNK	1.25656	0.0282779	0.855649	0.0583169	not_significant	hormonally up-regulated Neu-associated kinase
ENSG00000187678	SPRY4	1.25604	0.00111382	1.59883	1.09146e-10	significant	sprouty RTK signaling antagonist 4
ENSG00000138050	THUMPD2	1.2535	9.0816e-17	1.24921	9.97812e-15	significant	THUMP domain containing 2
ENSG00000166226	CCT2	1.25329	6.03902e-21	1.11715	1.37026e-14	significant	chaperonin containing TCP1 subunit 2
ENSG00000039560	RAI14	1.25304	9.06538e-21	1.79385	3.57742e-31	significant	retinoic acid induced 14
ENSG00000205730	ITPRIPL2	1.25218	2.29641e-16	1.36532	6.83852e-28	significant	ITPRIP like 2
ENSG00000152242	C18orf25	1.2503	9.01444e-31	1.05609	6.52617e-16	significant	chromosome 18 open reading frame 25
ENSG00000162618	ADGRL4	1.24937	4.83191e-07	0.774731	0.00415015	significant	adhesion G protein-coupled receptor L4
ENSG00000196497	IPO4	1.24784	2.54931e-14	0.921016	2.28129e-11	significant	importin 4
ENSG00000275400		1.24772	2.39577e-05	1.00615	0.0283418	significant
ENSG00000139508	SLC46A3	1.24715	0.000867703	0.135068	0.747783	not_significant	solute carrier family 46 member 3
ENSG00000236456		1.24651	0.0226841	0.843731	0.135137	not_significant
ENSG00000106070	GRB10	1.24639	1.75072e-22	0.712908	0.0115574	significant	growth factor receptor bound protein 10
ENSG00000179859	RNF227	1.2463	0.00918894	0.428974	0.234947	not_significant	ring finger protein 227
ENSG00000172175	MALT1	1.24585	1.19324e-16	0.783583	3.46991e-05	significant	MALT1 paracaspase
ENSG00000173542	MOB1B	1.24568	1.35452e-25	1.17602	3.81512e-11	significant	MOB kinase activator 1B
ENSG00000257949	TEN1	1.24544	6.44233e-08	0.689237	0.000396819	significant	TEN1 subunit of CST complex
ENSG00000130810	PPAN	1.24507	8.89677e-12	1.06935	2.81926e-13	significant	peter pan homolog
ENSG00000123395	ATG101	1.2448	3.33776e-12	1.21705	8.63715e-06	significant	autophagy related 101
ENSG00000188158	NHS	1.24472	0.0140229	1.04719	0.0327342	significant	NHS actin remodeling regulator
ENSG00000037474	NSUN2	1.24425	7.5008e-23	1.209	1.88904e-25	significant	NOP2/Sun RNA methyltransferase 2
ENSG00000162413	KLHL21	1.24297	1.91552e-13	0.838737	2.31509e-05	significant	kelch like family member 21
ENSG00000169764	UGP2	1.24268	4.99425e-18	0.804645	3.01336e-06	significant	UDP-glucose pyrophosphorylase 2
ENSG00000234160		1.24138	0.0181624	0.896068	0.205384	not_significant
ENSG00000161091	MFSD12	1.23803	3.44609e-17	1.16091	8.61636e-10	significant	major facilitator superfamily domain containing 12
ENSG00000136891	TEX10	1.23616	4.72851e-17	1.0566	6.92349e-07	significant	testis expressed 10
ENSG00000169213	RAB3B	1.23591	0.000896175	1.32279	1.07913e-06	significant	RAB3B, member RAS oncogene family
ENSG00000161960	EIF4A1	1.23459	2.77003e-26	1.06245	2.62572e-24	significant	eukaryotic translation initiation factor 4A1
ENSG00000080823	MOK	1.23455	5.55419e-05	0.325306	0.501418	not_significant	MOK protein kinase
ENSG00000197646	PDCD1LG2	1.23009	3.6447e-06	1.46201	1.084e-07	significant	programmed cell death 1 ligand 2
ENSG00000185950	IRS2	1.22703	2.30941e-16	0.523802	0.000297649	significant	insulin receptor substrate 2
ENSG00000147394	ZNF185	1.22548	0.00675189	0.604698	0.0987734	not_significant	zinc finger protein 185 with LIM domain
ENSG00000001084	GCLC	1.22314	4.27961e-14	-0.485862	0.15631	not_significant	glutamate-cysteine ligase catalytic subunit
ENSG00000103064	SLC7A6	1.22307	1.19635e-05	1.14738	1.12318e-05	significant	solute carrier family 7 member 6
ENSG00000105821	DNAJC2	1.2229	1.0529e-14	1.10948	3.2496e-12	significant	DnaJ heat shock protein family (Hsp40) member C2
ENSG00000188643	S100A16	1.22261	1.63927e-10	1.01996	5.06212e-10	significant	S100 calcium binding protein A16
ENSG00000111780		1.22234	0.0466442	0.446158	0.532279	not_significant
ENSG00000159176	CSRP1	1.2223	2.92855e-07	1.49315	6.96309e-11	significant	cysteine and glycine rich protein 1
ENSG00000184584	TMEM173	1.22194	8.89425e-15	0.667696	0.00407807	significant	transmembrane protein 173
ENSG00000065183	WDR3	1.22175	1.47546e-18	1.00309	1.13896e-09	significant	WD repeat domain 3
ENSG00000240225	ZNF542P	1.2202	1.04235e-14	0.533068	0.010832	significant	zinc finger protein 542, pseudogene
ENSG00000037897	METTL1	1.21988	4.63172e-16	0.88222	2.78039e-07	significant	methyltransferase like 1
ENSG00000228106		1.21937	0.000582541	0.91247	0.00488682	significant
ENSG00000168214	RBPJ	1.21847	1.27091e-22	1.3034	6.51292e-17	significant	recombination signal binding protein for immunoglobulin kappa J region
ENSG00000274307		1.21776	3.1566e-05	1.23033	9.33269e-05	significant
ENSG00000175166	PSMD2	1.21694	2.95984e-14	1.1315	2.59088e-13	significant	proteasome 26S subunit, non-ATPase 2
ENSG00000235531	MSC-AS1	1.21291	0.000125884	0.498412	0.0239049	significant	MSC antisense RNA 1
ENSG00000031081	ARHGAP31	1.21055	4.04864e-19	1.23872	3.89578e-14	significant	Rho GTPase activating protein 31
ENSG00000100219	XBP1	1.20965	4.07671e-11	1.27517	0.000223335	significant	X-box binding protein 1
ENSG00000164674	SYTL3	1.20945	3.1441e-11	1.35865	1.06661e-05	significant	synaptotagmin like 3
ENSG00000134516	DOCK2	1.20924	1.17947e-13	0.758572	0.039667	significant	dedicator of cytokinesis 2
ENSG00000187555	USP7	1.20889	2.89426e-24	0.940033	4.40675e-14	significant	ubiquitin specific peptidase 7
ENSG00000280143		1.20709	0.00772445	1.05632	0.00123892	significant
ENSG00000205571	SMN1	1.20682	3.39746e-07	1.18291	4.47283e-05	significant	survival of motor neuron 1, telomeric
ENSG00000163597	SNHG16	1.20359	2.36108e-35	0.75776	4.71626e-06	significant	small nucleolar RNA host gene 16
ENSG00000149428	HYOU1	1.2031	3.63955e-11	1.47808	3.69425e-05	significant	hypoxia up-regulated 1
ENSG00000086544	ITPKC	1.20297	0.000163152	0.579712	0.127671	not_significant	inositol-trisphosphate 3-kinase C
ENSG00000161638	ITGA5	1.20143	8.6917e-14	1.16516	4.34708e-17	significant	integrin subunit alpha 5
ENSG00000074356	NCBP3	1.20047	1.63519e-13	0.867543	8.6156e-07	significant	nuclear cap binding subunit 3
ENSG00000204217	BMPR2	1.20033	1.32569e-15	1.14307	3.53897e-08	significant	bone morphogenetic protein receptor type 2
ENSG00000268750		1.1988	0.00136234	0.808901	0.0910185	not_significant
ENSG00000240764	PCDHGC5	1.19609	2.11632e-08	0.903921	0.0124529	significant	protocadherin gamma subfamily C, 5
ENSG00000129245	FXR2	1.19566	1.18273e-32	0.864029	2.94656e-22	significant	FMR1 autosomal homolog 2
ENSG00000124787	RPP40	1.19402	3.96174e-11	1.05902	1.98313e-08	significant	ribonuclease P/MRP subunit p40
ENSG00000067533	RRP15	1.19384	4.27842e-12	1.13391	9.31021e-11	significant	ribosomal RNA processing 15 homolog
ENSG00000092820	EZR	1.19336	2.70329e-07	0.709114	0.0373888	significant	ezrin
ENSG00000107643	MAPK8	1.19094	5.6888e-18	0.921466	3.80203e-08	significant	mitogen-activated protein kinase 8
ENSG00000198742	SMURF1	1.18997	1.21579e-20	0.91802	1.4321e-10	significant	SMAD specific E3 ubiquitin protein ligase 1
ENSG00000233864		1.18922	1.57509e-08	0.510964		not_significant
ENSG00000172061	LRRC15	1.1887	2.31859e-10	1.33478	2.26887e-12	significant	leucine rich repeat containing 15
ENSG00000104312	RIPK2	1.18846	1.73113e-07	1.61509	3.07593e-13	significant	receptor interacting serine/threonine kinase 2
ENSG00000117394	SLC2A1	1.18844	0.000165075	1.06591	0.00192558	significant	solute carrier family 2 member 1
ENSG00000160208	RRP1B	1.18738	1.61475e-21	0.813272	7.64964e-08	significant	ribosomal RNA processing 1B
ENSG00000114767	RRP9	1.18589	1.23045e-10	1.11993	4.51038e-13	significant	ribosomal RNA processing 9, U3 small nucleolar RNA binding protein
ENSG00000185338	SOCS1	1.18588	0.030912	0.868852	0.0250579	significant	suppressor of cytokine signaling 1
ENSG00000168994	PXDC1	1.18555	0.00029767	1.50559	1.52757e-06	significant	PX domain containing 1
ENSG00000144597	EAF1	1.18413	1.35707e-17	1.00923	6.95202e-11	significant	ELL associated factor 1
ENSG00000164574	GALNT10	1.18402	1.97994e-14	1.29293	1.05868e-15	significant	polypeptide N-acetylgalactosaminyltransferase 10
ENSG00000240849	TMEM189	1.18272	1.86215e-06	1.0402	7.97038e-07	significant	transmembrane protein 189
ENSG00000124216	SNAI1	1.18248	0.0316992	2.18021	4.74951e-05	significant	snail family transcriptional repressor 1
ENSG00000160201	U2AF1	1.18114	7.61602e-14	0.756564	2.76524e-07	significant	U2 small nuclear RNA auxiliary factor 1
ENSG00000125630	POLR1B	1.17858	2.5966e-10	0.685752	0.00165091	significant	RNA polymerase I subunit B
ENSG00000013375	PGM3	1.17858	1.81105e-23	1.42869	4.55104e-13	significant	phosphoglucomutase 3
ENSG00000113615	SEC24A	1.17764	3.97763e-17	1.18517	4.28862e-08	significant	SEC24 homolog A, COPII coat complex component
ENSG00000124784	RIOK1	1.17419	1.72276e-20	1.22199	2.22757e-23	significant	RIO kinase 1
ENSG00000171453	POLR1C	1.17418	3.84704e-15	0.798745	3.16385e-06	significant	RNA polymerase I and III subunit C
ENSG00000058091	CDK14	1.17407	4.80719e-09	1.65218	1.15029e-12	significant	cyclin dependent kinase 14
ENSG00000143933	CALM2	1.17293	1.3998e-18	0.911118	2.58431e-05	significant	calmodulin 2
ENSG00000099725	PRKY	1.17252	2.39458e-21	0.5588		not_significant	protein kinase Y-linked (pseudogene)
ENSG00000127334	DYRK2	1.17225	1.20875e-05	0.9293	3.6624e-08	significant	dual specificity tyrosine phosphorylation regulated kinase 2
ENSG00000261114		1.16963	0.0200566	-0.0806583	0.911045	not_significant
ENSG00000072682	P4HA2	1.16937	2.93736e-10	0.806919	0.0338731	significant	prolyl 4-hydroxylase subunit alpha 2
ENSG00000116649	SRM	1.16758	9.06333e-19	1.06798	6.09506e-18	significant	spermidine synthase
ENSG00000111424	VDR	1.16665	3.30414e-06	0.779067	0.0261857	significant	vitamin D receptor
ENSG00000164163	ABCE1	1.1666	1.86902e-22	0.886963	7.78642e-05	significant	ATP binding cassette subfamily E member 1
ENSG00000107443	CCNJ	1.16636	4.77108e-13	1.01254	6.75278e-07	significant	cyclin J
ENSG00000138709	LARP1B	1.16518	2.06182e-14	1.12314	1.25272e-06	significant	La ribonucleoprotein domain family member 1B
ENSG00000103121	CMC2	1.16501	1.5586e-10	1.12941	1.09534e-10	significant	C-X9-C motif containing 2
ENSG00000274654		1.16374	0.0427293	1.87054	1.75661e-05	significant
ENSG00000164338	UTP15	1.16353	8.48561e-15	0.675039	0.0100505	significant	UTP15 small subunit processome component
ENSG00000143322	ABL2	1.16331	3.41871e-09	1.33629	2.17562e-11	significant	ABL proto-oncogene 2, non-receptor tyrosine kinase
ENSG00000157617	C2CD2	1.16239	5.46653e-11	1.01514	8.12197e-13	significant	C2 calcium dependent domain containing 2
ENSG00000136950	ARPC5L	1.16232	8.5591e-11	0.973941	3.98474e-07	significant	actin related protein 2/3 complex subunit 5 like
ENSG00000128487	SPECC1	1.16219	3.26425e-11	1.22073	1.10155e-08	significant	sperm antigen with calponin homology and coiled-coil domains 1
ENSG00000197780	TAF13	1.16184	2.26622e-10	1.3719	5.38838e-13	significant	TATA-box binding protein associated factor 13
ENSG00000125753	VASP	1.16107	7.79789e-05	1.02635	0.000428406	significant	vasodilator stimulated phosphoprotein
ENSG00000188807	TMEM201	1.16095	4.09044e-09	0.909568	0.0167594	significant	transmembrane protein 201
ENSG00000159363	ATP13A2	1.15996	3.10294e-12	1.07753	1.46063e-15	significant	ATPase cation transporting 13A2
ENSG00000283251		1.15929	0.00808179	1.80179	0.0215432	significant
ENSG00000146094	DOK3	1.15921	0.000290991	1.18523	0.00734678	significant	docking protein 3
ENSG00000140443	IGF1R	1.15911	1.22891e-08	1.08444	4.77489e-05	significant	insulin like growth factor 1 receptor
ENSG00000170525	PFKFB3	1.15874	2.83372e-05	1.62643	1.47613e-06	significant	6-phosphofructo-2-kinase/fructose-2,6-biphosphatase 3
ENSG00000250506	CDK3	1.15796	6.5952e-05	0.562952	0.334531	not_significant	cyclin dependent kinase 3
ENSG00000178896	EXOSC4	1.1572	1.46305e-13	0.929467	1.22894e-13	significant	exosome component 4
ENSG00000168389	MFSD2A	1.15566	0.00105863	1.1261	0.0265576	significant	major facilitator superfamily domain containing 2A
ENSG00000087008	ACOX3	1.15564	8.66914e-10	1.15264	1.21743e-09	significant	acyl-CoA oxidase 3, pristanoyl
ENSG00000156265	MAP3K7CL	1.15328	0.000167517	0.429702	0.238184	not_significant	MAP3K7 C-terminal like
ENSG00000066697	MSANTD3	1.15316	5.28097e-16	1.12984	5.56657e-16	significant	Myb/SANT DNA binding domain containing 3
ENSG00000235884		1.15137	3.86789e-09	1.01335	1.12337e-06	significant
ENSG00000229334		1.15074	0.00162652	1.12305	0.0006029	significant
ENSG00000156313	RPGR	1.14478	1.85575e-09	1.10157	1.34488e-07	significant	retinitis pigmentosa GTPase regulator
ENSG00000139173	TMEM117	1.1407	3.10559e-14	0.306368	0.296975	not_significant	transmembrane protein 117
ENSG00000167721	TSR1	1.14047	2.70774e-16	0.878266	2.57552e-08	significant	TSR1 ribosome maturation factor
ENSG00000166451	CENPN	1.14004	3.08452e-06	1.00781	0.000296396	significant	centromere protein N
ENSG00000137692	DCUN1D5	1.13988	4.29321e-30	1.02603	7.84485e-14	significant	defective in cullin neddylation 1 domain containing 5
ENSG00000065621	GSTO2	1.13841	1.53699e-08	1.47015	1.75176e-07	significant	glutathione S-transferase omega 2
ENSG00000171208	NETO2	1.13778	0.000940883	1.20444	0.000904291	significant	neuropilin and tolloid like 2
ENSG00000168495	POLR3D	1.13695	1.94182e-16	1.0578	6.40675e-13	significant	RNA polymerase III subunit D
ENSG00000142303	ADAMTS10	1.13628	0.0432461	1.17662	0.00019637	significant	ADAM metallopeptidase with thrombospondin type 1 motif 10
ENSG00000114850	SSR3	1.13618	9.26243e-21	1.06689	9.08682e-07	significant	signal sequence receptor subunit 3
ENSG00000164045	CDC25A	1.13573	0.0279617	0.680485	0.317923	not_significant	cell division cycle 25A
ENSG00000256663		1.13549	0.0177878	0.124645	0.910509	not_significant
ENSG00000197019	SERTAD1	1.13445	3.83971e-05	1.0468	4.56982e-05	significant	SERTA domain containing 1
ENSG00000261740	BOLA2-SMG1P6	1.13404	2.56653e-08	0.674855	0.00053461	significant	BOLA2-SMG1P6 readthrough
ENSG00000004961	HCCS	1.13308	2.10406e-52	1.05783	8.81341e-16	significant	holocytochrome c synthase
ENSG00000172115	CYCS	1.13265	2.00383e-17	1.10848	4.49017e-07	significant	cytochrome c, somatic
ENSG00000134109	EDEM1	1.13252	1.3651e-23	1.08377	1.03606e-08	significant	ER degradation enhancing alpha-mannosidase like protein 1
ENSG00000235852		1.12919	0.000260973	0.341089	0.530313	not_significant
ENSG00000264772		1.12894	0.000270517	0.852373	0.000794006	significant
ENSG00000102385	DRP2	1.12759	3.01769e-05	0.801261	0.0558626	not_significant	dystrophin related protein 2
ENSG00000123545	NDUFAF4	1.12747	2.91892e-16	0.952773	6.9516e-08	significant	NADH:ubiquinone oxidoreductase complex assembly factor 4
ENSG00000131873	CHSY1	1.12655	1.63567e-07	1.36416	5.41216e-05	significant	chondroitin sulfate synthase 1
ENSG00000198853	RUSC2	1.12583	1.62664e-11	1.08214	2.51798e-07	significant	RUN and SH3 domain containing 2
ENSG00000148840	PPRC1	1.12501	1.13097e-12	1.03509	5.34835e-09	significant	PPARG related coactivator 1
ENSG00000167977	KCTD5	1.12461	1.81409e-18	1.22814	1.45254e-35	significant	potassium channel tetramerization domain containing 5
ENSG00000212123	PRR22	1.12441	0.00281317	0.930243	0.0395379	significant	proline rich 22
ENSG00000196935	SRGAP1	1.12327	1.49365e-22	0.344678	0.194301	not_significant	SLIT-ROBO Rho GTPase activating protein 1
ENSG00000133121	STARD13	1.12133	0.00207322	1.34319	1.662e-11	significant	StAR related lipid transfer domain containing 13
ENSG00000110427	KIAA1549L	1.12006	4.242e-07	0.762834	0.00024201	significant	KIAA1549 like
ENSG00000204147	ASAH2B	1.11984	1.98665e-09	0.859455	3.84609e-05	significant	N-acylsphingosine amidohydrolase 2B
ENSG00000108829	LRRC59	1.1187	2.85994e-16	1.14519	1.18823e-13	significant	leucine rich repeat containing 59
ENSG00000170624	SGCD	1.11732	9.91354e-09	1.02821	0.00261283	significant	sarcoglycan delta
ENSG00000196196	HRCT1	1.1164	8.43652e-08	1.59317	0.0890517	not_significant	histidine rich carboxyl terminus 1
ENSG00000196628	TCF4	1.11601	3.40049e-11	0.65964	1.43958e-05	significant	transcription factor 4
ENSG00000173540	GMPPB	1.11516	6.53056e-15	1.15477	1.38778e-06	significant	GDP-mannose pyrophosphorylase B
ENSG00000086189	DIMT1	1.11406	9.20938e-19	0.905246	6.33571e-11	significant	DIMT1 rRNA methyltransferase and ribosome maturation factor
ENSG00000204856	FAM216A	1.11369	3.64495e-08	0.862636	6.78113e-05	significant	family with sequence similarity 216 member A
ENSG00000186019	LOC100379224	1.11349	5.65235e-05	0.565881	0.0860144	not_significant	uncharacterized LOC100379224
ENSG00000104907	TRMT1	1.11269	1.85653e-15	0.966212	1.12331e-09	significant	tRNA methyltransferase 1
ENSG00000142910	TINAGL1	1.11199	0.0269845	1.91341	0.00151499	significant	tubulointerstitial nephritis antigen like 1
ENSG00000115648	MLPH	1.11162	0.00982666	0.924915	0.0112424	significant	melanophilin
ENSG00000280173		1.11143	3.13402e-05	0.642871	0.0445616	significant
ENSG00000105447	GRWD1	1.11002	4.14389e-14	1.05196	4.87505e-11	significant	glutamate rich WD repeat containing 1
ENSG00000151287	TEX30	1.10958	1.08538e-05	0.846942	0.0474426	significant	testis expressed 30
ENSG00000213846		1.10956	2.4854e-07	1.43216	5.81368e-12	significant
ENSG00000147883	CDKN2B	1.10955	5.59747e-11	1.23911	5.85834e-11	significant	cyclin dependent kinase inhibitor 2B
ENSG00000157514	TSC22D3	1.10946	0.00366064	0.825323	0.0150918	significant	TSC22 domain family member 3
ENSG00000257663		1.10695	0.0396398	1.26844	0.0168057	significant
ENSG00000100029	PES1	1.10474	1.07616e-14	0.882233	3.54565e-11	significant	pescadillo ribosomal biogenesis factor 1
ENSG00000152484	USP12	1.10448	4.2245e-24	0.926716	1.55033e-05	significant	ubiquitin specific peptidase 12
ENSG00000137955	RABGGTB	1.10415	8.22023e-32	0.908205	2.54019e-08	significant	Rab geranylgeranyltransferase subunit beta
ENSG00000278341		1.10251	0.00222515	0.5715	0.107738	not_significant
ENSG00000033178	UBA6	1.101	8.65587e-28	1.19534	1.51174e-07	significant	ubiquitin like modifier activating enzyme 6
ENSG00000177889	UBE2N	1.10045	2.24098e-28	1.04787	2.65705e-09	significant	ubiquitin conjugating enzyme E2 N
ENSG00000173276	ZBTB21	1.10006	8.48939e-08	0.908096	0.000107619	significant	zinc finger and BTB domain containing 21
ENSG00000062716	VMP1	1.09931	2.74761e-11	1.07916	1.6411e-06	significant	vacuole membrane protein 1
ENSG00000108021	TASOR2	1.0993	7.79478e-16	0.990016	1.23631e-07	significant	transcription activation suppressor family member 2
ENSG00000258777	HIF1A-AS1	1.0983	0.0439	1.59989	0.00541292	significant	HIF1A antisense RNA 1
ENSG00000139496	NUP58	1.09371	7.08728e-18	0.977433	7.07745e-08	significant	nucleoporin 58
ENSG00000141378	PTRH2	1.09367	6.07064e-09	0.748997	0.00146929	significant	peptidyl-tRNA hydrolase 2
ENSG00000141076	UTP4	1.09255	1.76009e-12	0.802784	3.90956e-07	significant	UTP4 small subunit processome component
ENSG00000138448	ITGAV	1.09159	2.84108e-06	0.787897	0.00276369	significant	integrin subunit alpha V
ENSG00000110092	CCND1	1.09055	0.000595984	1.20976	0.000983906	significant	cyclin D1
ENSG00000123473	STIL	1.08972	8.90884e-05	0.717225	0.164472	not_significant	STIL centriolar assembly protein
ENSG00000072110	ACTN1	1.08939	6.58029e-08	0.96943	1.65843e-06	significant	actinin alpha 1
ENSG00000197555	SIPA1L1	1.08697	5.33593e-06	1.06651	2.13018e-09	significant	signal induced proliferation associated 1 like 1
ENSG00000135521	LTV1	1.0847	4.09633e-16	0.840254	1.73741e-09	significant	LTV1 ribosome biogenesis factor
ENSG00000136802	LRRC8A	1.08454	3.71881e-09	1.31793	4.82012e-10	significant	leucine rich repeat containing 8 VRAC subunit A
ENSG00000179051	RCC2	1.08445	3.91101e-08	0.945638	1.17375e-05	significant	regulator of chromosome condensation 2
ENSG00000117143	UAP1	1.0843	1.62547e-05	1.22551	4.83394e-12	significant	UDP-N-acetylglucosamine pyrophosphorylase 1
ENSG00000139629	GALNT6	1.08362	9.94419e-06	0.889135	0.00349953	significant	polypeptide N-acetylgalactosaminyltransferase 6
ENSG00000167088	SNRPD1	1.08262	2.32912e-10	0.811344	1.04505e-05	significant	small nuclear ribonucleoprotein D1 polypeptide
ENSG00000132768	DPH2	1.07999	2.14577e-17	0.880607	2.2405e-13	significant	diphthamide biosynthesis 2
ENSG00000185344	ATP6V0A2	1.07997	1.3161e-08	0.755155	0.000414007	significant	ATPase H+ transporting V0 subunit a2
ENSG00000116711	PLA2G4A	1.07851	0.0389694	1.25503	0.00017748	significant	phospholipase A2 group IVA
ENSG00000165997	ARL5B	1.0781	5.70854e-05	0.910098	0.00076188	significant	ADP ribosylation factor like GTPase 5B
ENSG00000172062	SMN1	1.0775	7.35725e-09	0.769771	0.00108548	significant	survival of motor neuron 1, telomeric
ENSG00000186432	KPNA4	1.07716	7.19405e-14	1.01078	1.66231e-11	significant	karyopherin subunit alpha 4
ENSG00000185022	MAFF	1.07674	0.0004877	0.530516	0.00542246	significant	MAF bZIP transcription factor F
ENSG00000164465	DCBLD1	1.07665	2.43738e-11	1.33872	1.27794e-14	significant	discoidin, CUB and LCCL domain containing 1
ENSG00000177034	MTX3	1.07497	6.90598e-10	0.65517	2.2386e-08	significant	metaxin 3
ENSG00000131871	SELENOS	1.07464	9.11572e-18	1.26325	1.94659e-11	significant	selenoprotein S
ENSG00000120942	UBIAD1	1.07431	1.39727e-17	0.739144	0.000769479	significant	UbiA prenyltransferase domain containing 1
ENSG00000105926	MPP6	1.07304	4.18887e-08	1.1117	2.07922e-09	significant	membrane palmitoylated protein 6
ENSG00000103342	GSPT1	1.07277	6.48246e-18	0.941483	7.0831e-10	significant	G1 to S phase transition 1
ENSG00000173210	ABLIM3	1.07017	2.53987e-06	0.84923	0.000174311	significant	actin binding LIM protein family member 3
ENSG00000066084	DIP2B	1.06953	7.47811e-30	1.01866	1.89401e-17	significant	disco interacting protein 2 homolog B
ENSG00000235313		1.06932	0.0387758	1.1169	0.0841736	not_significant
ENSG00000111186	WNT5B	1.06925	0.000328485	1.41896	2.08575e-07	significant	Wnt family member 5B
ENSG00000134278	SPIRE1	1.06778	1.89237e-25	0.993237	1.69841e-11	significant	spire type actin nucleation factor 1
ENSG00000112655	PTK7	1.06684	8.0587e-10	0.429415	0.0736027	not_significant	protein tyrosine kinase 7 (inactive)
ENSG00000280355		1.06658	1.70116e-05	0.788313	0.00010917	significant
ENSG00000144381	HSPD1	1.06628	2.29435e-11	0.842099	1.83898e-05	significant	heat shock protein family D (Hsp60) member 1
ENSG00000088205	DDX18	1.06587	6.48798e-27	0.870148	4.26748e-09	significant	DEAD-box helicase 18
ENSG00000089639	GMIP	1.06406	5.24784e-13	1.2301	7.0738e-15	significant	GEM interacting protein
ENSG00000126562	WNK4	1.06191	0.00110193	0.862607	0.0709164	not_significant	WNK lysine deficient protein kinase 4
ENSG00000171163	ZNF692	1.06084	1.95948e-07	0.484456	0.0751073	not_significant	zinc finger protein 692
ENSG00000166250	CLMP	1.05772	4.74792e-12	1.22892	9.35677e-10	significant	CXADR like membrane protein
ENSG00000196517	SLC6A9	1.05741	0.0315111	1.06802	0.205415	not_significant	solute carrier family 6 member 9
ENSG00000111845	PAK1IP1	1.05725	3.57338e-07	0.985843	8.1626e-08	significant	PAK1 interacting protein 1
ENSG00000222009	BTBD19	1.05697	0.000512374	0.979909	0.00141558	significant	BTB domain containing 19
ENSG00000116455	WDR77	1.05689	5.49914e-11	1.08264	1.64067e-11	significant	WD repeat domain 77
ENSG00000139083	ETV6	1.05686	7.61602e-14	0.766628	5.31776e-07	significant	ETS variant 6
ENSG00000205534		1.05557	0.0272284	0.205537	0.664349	not_significant
ENSG00000214706	IFRD2	1.05429	1.60844e-09	0.957528	4.26842e-08	significant	interferon related developmental regulator 2
ENSG00000119737	GPR75	1.0537	0.0175358	1.4984	0.000152631	significant	G protein-coupled receptor 75
ENSG00000132952	USPL1	1.05069	2.82097e-12	0.907749	0.00113613	significant	ubiquitin specific peptidase like 1
ENSG00000164687	FABP5	1.05033	0.0120209	1.15544	1.57105e-05	significant	fatty acid binding protein 5
ENSG00000101199	ARFGAP1	1.0503	9.78702e-16	1.11096	7.44565e-06	significant	ADP ribosylation factor GTPase activating protein 1
ENSG00000179115	FARSA	1.05003	1.87299e-16	0.904016	8.64267e-10	significant	phenylalanyl-tRNA synthetase subunit alpha
ENSG00000267519		1.04978	2.89251e-05	0.874114	0.00236582	significant
ENSG00000124120	TTPAL	1.04946	3.17829e-16	0.564934	0.00103443	significant	alpha tocopherol transfer protein like
ENSG00000082516	GEMIN5	1.04922	2.54719e-12	0.801041	1.45115e-05	significant	gem nuclear organelle associated protein 5
ENSG00000074047	GLI2	1.04834	1.17746e-06	1.18978	6.90432e-16	significant	GLI family zinc finger 2
ENSG00000170515	PA2G4	1.04819	2.40874e-12	0.834105	8.38785e-06	significant	proliferation-associated 2G4
ENSG00000127080	IPPK	1.04769	9.78104e-08	0.974739	4.20188e-10	significant	inositol-pentakisphosphate 2-kinase
ENSG00000115761	NOL10	1.04727	1.39565e-33	0.853027	1.88308e-11	significant	nucleolar protein 10
ENSG00000029153	ARNTL2	1.04716	0.0158418	1.11352	0.0216721	significant	aryl hydrocarbon receptor nuclear translocator like 2
ENSG00000100644	HIF1A	1.0462	1.12617e-14	1.18538	1.68104e-06	significant	hypoxia inducible factor 1 subunit alpha
ENSG00000089195	TRMT6	1.04584	1.13815e-12	0.878787	3.32421e-05	significant	tRNA methyltransferase 6
ENSG00000169251	NMD3	1.04544	9.10896e-19	1.03835	6.09411e-13	significant	NMD3 ribosome export adaptor
ENSG00000096384	HSP90AB1	1.04466	4.33328e-26	0.937378	6.7956e-19	significant	heat shock protein 90 alpha family class B member 1
ENSG00000178409	BEND3	1.04306	0.00108739	0.965607	0.0102111	significant	BEN domain containing 3
ENSG00000006652	IFRD1	1.04222	1.61795e-07	0.687854	0.00350758	significant	interferon related developmental regulator 1
ENSG00000165271	NOL6	1.04115	3.36805e-10	1.04453	2.14453e-10	significant	nucleolar protein 6
ENSG00000224531	SMIM13	1.04066	1.22786e-06	0.853276	0.00064798	significant	small integral membrane protein 13
ENSG00000166224	SGPL1	1.03993	1.93784e-12	0.631982	0.0173157	significant	sphingosine-1-phosphate lyase 1
ENSG00000162851	TFB2M	1.03975	3.98752e-14	0.945393	1.13901e-11	significant	transcription factor B2, mitochondrial
ENSG00000157216	SSBP3	1.03925	7.49615e-27	1.37117	1.08688e-49	significant	single stranded DNA binding protein 3
ENSG00000145715	RASA1	1.03915	3.84758e-07	1.31147	1.66114e-13	significant	RAS p21 protein activator 1
ENSG00000100344	PNPLA3	1.03893	0.000178401	0.369043	0.404311	not_significant	patatin like phospholipase domain containing 3
ENSG00000256087	ZNF432	1.03868	1.04675e-07	0.971912	4.48715e-05	significant	zinc finger protein 432
ENSG00000144867	SRPRB	1.03808	1.1858e-12	0.901483	4.73734e-06	significant	SRP receptor subunit beta
ENSG00000170345	FOS	1.03744	0.0203884	0.583783	0.331993	not_significant	Fos proto-oncogene, AP-1 transcription factor subunit
ENSG00000187957	DNER	1.0354	0.00813363	0.895312	0.343112	not_significant	delta/notch like EGF repeat containing
ENSG00000120742	SERP1	1.03479	1.24473e-13	1.13437	0.000117409	significant	stress associated endoplasmic reticulum protein 1
ENSG00000171490	RSL1D1	1.03434	2.81569e-17	0.866861	2.55728e-09	significant	ribosomal L1 domain containing 1
ENSG00000107282	APBA1	1.03392	2.17987e-07	0.237751	0.539376	not_significant	amyloid beta precursor protein binding family A member 1
ENSG00000140280	LYSMD2	1.03267	8.49859e-05	1.03071	3.79248e-07	significant	LysM domain containing 2
ENSG00000089159	PXN	1.03218	1.95267e-05	0.863559	6.33994e-09	significant	paxillin
ENSG00000169826	CSGALNACT2	1.03203	7.80264e-08	0.764093	5.65367e-06	significant	chondroitin sulfate N-acetylgalactosaminyltransferase 2
ENSG00000133216	EPHB2	1.03104	2.20496e-06	0.905159	1.11938e-05	significant	EPH receptor B2
ENSG00000273038		1.03075	1.27998e-11	1.38418	2.67023e-11	significant
ENSG00000145194	ECE2	1.02973	0.00432861	0.872744	0.0608151	not_significant	endothelin converting enzyme 2
ENSG00000146648	EGFR	1.02942	0.000812	0.98819	3.53695e-09	significant	epidermal growth factor receptor
ENSG00000113013	HSPA9	1.02932	5.67484e-15	0.791537	4.58308e-06	significant	heat shock protein family A (Hsp70) member 9
ENSG00000120705	ETF1	1.02704	2.62371e-20	0.838581	3.8723e-11	significant	eukaryotic translation termination factor 1
ENSG00000113460	BRIX1	1.02693	2.56244e-13	0.694636	0.000633948	significant	biogenesis of ribosomes BRX1
ENSG00000134375	TIMM17A	1.02675	1.29983e-17	1.00089	1.2577e-09	significant	translocase of inner mitochondrial membrane 17A
ENSG00000135723	FHOD1	1.02259	0.00746535	0.983799	0.0167788	significant	formin homology 2 domain containing 1
ENSG00000221823	PPP3R1	1.02206	1.13597e-13	1.01343	1.40017e-11	significant	protein phosphatase 3 regulatory subunit B, alpha
ENSG00000117410	ATP6V0B	1.02154	3.80986e-13	0.837523	4.48886e-13	significant	ATPase H+ transporting V0 subunit b
ENSG00000140859	KIFC3	1.02056	3.7747e-24	1.2626	5.95496e-28	significant	kinesin family member C3
ENSG00000156697	UTP14A	1.02022	1.22203e-12	0.822398	2.48344e-08	significant	UTP14A small subunit processome component
ENSG00000140557	ST8SIA2	1.02011	0.0090948	1.61854	0.0836243	not_significant	ST8 alpha-N-acetyl-neuraminide alpha-2,8-sialyltransferase 2
ENSG00000108106	UBE2S	1.01986	1.13205e-08	1.16698	0.00510124	significant	ubiquitin conjugating enzyme E2 S
ENSG00000167491	GATAD2A	1.01984	9.01804e-12	0.95228	2.5565e-12	significant	GATA zinc finger domain containing 2A
ENSG00000164934	DCAF13	1.01955	3.38668e-20	0.85022	3.19571e-09	significant	DDB1 and CUL4 associated factor 13
ENSG00000107404	DVL1	1.01826	3.25652e-07	1.24972	1.65714e-20	significant	dishevelled segment polarity protein 1
ENSG00000111711	GOLT1B	1.01806	1.39258e-09	1.06737	1.30886e-05	significant	golgi transport 1B
ENSG00000197622	CDC42SE1	1.01754	7.94479e-05	1.14989	0.000169647	significant	CDC42 small effector 1
ENSG00000234964		1.01719	0.00761531	1.09112	0.000121411	significant
ENSG00000198142	SOWAHC	1.01626	0.00057293	0.643808	0.0476832	significant	sosondowah ankyrin repeat domain family member C
ENSG00000165733	BMS1	1.0162	6.9653e-31	0.953677	4.85044e-17	significant	BMS1 ribosome biogenesis factor
ENSG00000183520	UTP11	1.01604	1.40284e-18	0.812984	9.18787e-07	significant	UTP11 small subunit processome component
ENSG00000161547	SRSF2	1.01574	3.45547e-20	0.970779	8.41881e-13	significant	serine and arginine rich splicing factor 2
ENSG00000130635	COL5A1	1.01507	0.00226561	1.02611	0.0250599	significant	collagen type V alpha 1 chain
ENSG00000100731	PCNX1	1.0149	4.21959e-17	0.838214	1.30524e-09	significant	pecanex 1
ENSG00000068878	PSME4	1.01338	9.59423e-12	1.17827	1.77095e-15	significant	proteasome activator subunit 4
ENSG00000140406	TLNRD1	1.01308	7.43331e-09	1.15379	4.43027e-11	significant	talin rod domain containing 1
ENSG00000177150	FAM210A	1.01293	6.87782e-09	0.976244	1.89916e-06	significant	family with sequence similarity 210 member A
ENSG00000140526	ABHD2	1.01282	6.5887e-08	0.798109	0.00696722	significant	abhydrolase domain containing 2
ENSG00000104356	POP1	1.00618	2.31748e-09	1.11761	2.19574e-12	significant	POP1 homolog, ribonuclease P/MRP subunit
ENSG00000198841	KTI12	1.00486	1.37603e-11	0.819553	3.85771e-08	significant	KTI12 chromatin associated homolog
ENSG00000120708	TGFBI	1.00365	0.00209361	0.810611	0.120287	not_significant	transforming growth factor beta induced
ENSG00000107949	BCCIP	1.00301	5.30222e-16	0.79428	2.318e-08	significant	BRCA2 and CDKN1A interacting protein
ENSG00000008405	CRY1	1.00265	0.00323408	1.2614	0.00914368	significant	cryptochrome circadian regulator 1
ENSG00000139926	FRMD6	1.00257	1.22194e-07	0.880352	3.50691e-07	significant	FERM domain containing 6
ENSG00000155903	RASA2	1.0023	5.77408e-08	1.17694	3.17821e-13	significant	RAS p21 protein activator 2
ENSG00000150764	DIXDC1	1.00181	1.17806e-07	0.898462	1.32977e-06	significant	DIX domain containing 1
ENSG00000067334	DNTTIP2	0.999415	1.04163e-18	0.896486	2.69626e-09	significant	deoxynucleotidyltransferase terminal interacting protein 2
ENSG00000164889	SLC4A2	0.998979	1.44203e-41	1.1236	8.02572e-28	significant	solute carrier family 4 member 2
ENSG00000151929	BAG3	0.997546	1.23579e-25	0.984152	6.16095e-17	significant	BCL2 associated athanogene 3
ENSG00000180758	GPR157	0.997207	2.34392e-07	0.863296	0.00986404	significant	G protein-coupled receptor 157
ENSG00000139174	PRICKLE1	0.99714	0.0440681	0.722397	0.212167	not_significant	prickle planar cell polarity protein 1
ENSG00000108433	GOSR2	0.997099	2.20399e-15	0.75933	7.13814e-10	significant	golgi SNAP receptor complex member 2
ENSG00000127947	PTPN12	0.996295	3.35283e-10	0.917198	5.03561e-09	significant	protein tyrosine phosphatase non-receptor type 12
ENSG00000068438	FTSJ1	0.994189	1.02683e-12	0.985577	1.78065e-15	significant	FtsJ RNA 2'-O-methyltransferase 1
ENSG00000181773	GPR3	0.994133	0.0192324	0.853933	0.0288595	significant	G protein-coupled receptor 3
ENSG00000170677	SOCS6	0.993998	4.34358e-10	0.982076	3.4791e-08	significant	suppressor of cytokine signaling 6
ENSG00000115641	FHL2	0.992927	4.00696e-07	0.859713	5.92305e-05	significant	four and a half LIM domains 2
ENSG00000101310	SEC23B	0.991975	2.51611e-14	0.834669	5.41798e-07	significant	SEC23 homolog B, coat complex II component
ENSG00000051108	HERPUD1	0.99148	6.8282e-08	1.04997	0.026504	significant	homocysteine inducible ER protein with ubiquitin like domain 1
ENSG00000138442	WDR12	0.991325	2.28756e-10	0.664071	0.000834958	significant	WD repeat domain 12
ENSG00000175984	DENND2C	0.991128	1.38752e-06	0.943698	1.55428e-07	significant	DENN domain containing 2C
ENSG00000251349	MSANTD3-TMEFF1	0.98984	0.000215515	1.22106	0.000283223	significant	MSANTD3-TMEFF1 readthrough
ENSG00000145050	MANF	0.989467	4.86623e-08	1.38795	9.43325e-06	significant	mesencephalic astrocyte derived neurotrophic factor
ENSG00000164654	MIOS	0.98941	1.82949e-14	0.602244	0.000815722	significant	meiosis regulator for oocyte development
ENSG00000116396	KCNC4	0.988312	0.000101287	1.0125	2.61628e-09	significant	potassium voltage-gated channel subfamily C member 4
ENSG00000176788	BASP1	0.986085	4.96365e-20	0.857474	2.52698e-13	significant	brain abundant membrane attached signal protein 1
ENSG00000189320	FAM180A	0.985152	0.0211951	1.55766	0.00431403	significant	family with sequence similarity 180 member A
ENSG00000206190	ATP10A	0.985124	6.12422e-15	1.62253	5.83442e-32	significant	ATPase phospholipid transporting 10A (putative)
ENSG00000101307	SIRPB1	0.984561	3.04063e-07	0.818335	0.00268785	significant	signal regulatory protein beta 1
ENSG00000102221	JADE3	0.983756	1.50324e-09	0.885487	3.8077e-07	significant	jade family PHD finger 3
ENSG00000111696	NT5DC3	0.983601	0.000111156	0.671758	0.0175372	significant	5'-nucleotidase domain containing 3
ENSG00000153989	NUS1	0.983339	8.98417e-16	1.29556	2.78133e-08	significant	NUS1 dehydrodolichyl diphosphate synthase subunit
ENSG00000135324	MRAP2	0.981307	0.0457257	1.51367	0.0551466	not_significant	melanocortin 2 receptor accessory protein 2
ENSG00000272476		0.981136	2.60461e-05	0.9854	7.78642e-05	significant
ENSG00000198855	FICD	0.980815	0.000163286	1.17377	0.000847832	significant	FIC domain containing
ENSG00000115053	NCL	0.980782	2.4214e-16	0.77203	6.06179e-10	significant	nucleolin
ENSG00000075391	RASAL2	0.980077	1.08318e-08	0.638376	0.000496211	significant	RAS protein activator like 2
ENSG00000143153	ATP1B1	0.97942	0.00100853	1.23957	3.40398e-07	significant	ATPase Na+/K+ transporting subunit beta 1
ENSG00000183336	BOLA2	0.978735	0.0016078	0.23627	0.653135	not_significant	bolA family member 2
ENSG00000125633	CCDC93	0.97872	6.66583e-11	0.37179	0.038089	significant	coiled-coil domain containing 93
ENSG00000100284	TOM1	0.976993	3.95915e-13	0.996352	2.2883e-07	significant	target of myb1 membrane trafficking protein
ENSG00000114423	CBLB	0.976588	0.000823077	0.746913	0.00432142	significant	Cbl proto-oncogene B
ENSG00000176915	ANKLE2	0.975201	4.83183e-22	0.854044	2.31479e-31	significant	ankyrin repeat and LEM domain containing 2
ENSG00000111252	SH2B3	0.974579	0.00310997	1.36705	5.91643e-15	significant	SH2B adaptor protein 3
ENSG00000165724	ZMYND19	0.974044	6.81933e-06	0.714786	0.00807322	significant	zinc finger MYND-type containing 19
ENSG00000119446	RBM18	0.973963	5.7086e-10	0.789702	4.14658e-06	significant	RNA binding motif protein 18
ENSG00000213694	S1PR3	0.973854	0.00179512	0.269061	0.562118	not_significant	sphingosine-1-phosphate receptor 3
ENSG00000213341	CHUK	0.973611	1.29232e-20	0.727886	0.000391536	significant	component of inhibitor of nuclear factor kappa B kinase complex
ENSG00000186416	NKRF	0.973299	2.69225e-07	0.703268	9.63366e-05	significant	NFKB repressing factor
ENSG00000142634	EFHD2	0.973174	1.83846e-07	1.00693	7.21756e-10	significant	EF-hand domain family member D2
ENSG00000164134	NAA15	0.972819	5.56078e-13	0.924255	4.33465e-05	significant	N(alpha)-acetyltransferase 15, NatA auxiliary subunit
ENSG00000261061		0.972599	0.00175004	0.94449	0.0199315	significant
ENSG00000075711	DLG1	0.97231	2.75087e-11	0.154651	0.276534	not_significant	discs large MAGUK scaffold protein 1
ENSG00000091527	CDV3	0.972298	1.2598e-08	0.88464	2.32907e-13	significant	CDV3 homolog
ENSG00000125485	DDX31	0.971092	4.13776e-09	0.960751	5.90929e-13	significant	DEAD-box helicase 31
ENSG00000134697	GNL2	0.969594	3.40947e-22	1.05317	5.95168e-17	significant	G protein nucleolar 2
ENSG00000272599		0.969399	0.0419974	0.645552	0.206768	not_significant
ENSG00000124789	NUP153	0.969092	1.69207e-18	0.884684	5.15019e-06	significant	nucleoporin 153
ENSG00000183023	SLC8A1	0.968067	0.00364136	0.451901	0.265599	not_significant	solute carrier family 8 member A1
ENSG00000160218	TRAPPC10	0.968045	1.80371e-22	1.02982	1.38621e-21	significant	trafficking protein particle complex 10
ENSG00000140650	PMM2	0.96725	2.57316e-15	0.97245	6.15682e-09	significant	phosphomannomutase 2
ENSG00000186908	ZDHHC17	0.966926	3.03182e-10	0.861163	1.18958e-06	significant	zinc finger DHHC-type containing 17
ENSG00000173546	CSPG4	0.966832	0.0002743	0.894109	0.00237218	significant	chondroitin sulfate proteoglycan 4
ENSG00000153551	CMTM7	0.966024	1.27884e-05	0.657226	0.0267261	significant	CKLF like MARVEL transmembrane domain containing 7
ENSG00000174106	LEMD3	0.965977	9.82735e-10	0.894325	7.35709e-07	significant	LEM domain containing 3
ENSG00000198498	TMA16	0.96511	1.27919e-10	0.594473	0.000783976	significant	translation machinery associated 16 homolog
ENSG00000144233	AMMECR1L	0.9642	2.10604e-09	0.90636	2.46435e-07	significant	AMMECR1 like
ENSG00000124383	MPHOSPH10	0.963619	2.20771e-25	0.798142	2.49754e-06	significant	M-phase phosphoprotein 10
ENSG00000157985	AGAP1	0.963293	1.15456e-11	0.570787	0.00899592	significant	ArfGAP with GTPase domain, ankyrin repeat and PH domain 1
ENSG00000166002	SMCO4	0.962657	0.000239232	1.46736	7.94078e-07	significant	single-pass membrane protein with coiled-coil domains 4
ENSG00000135316	SYNCRIP	0.962301	3.60572e-22	0.849661	1.34344e-09	significant	synaptotagmin binding cytoplasmic RNA interacting protein
ENSG00000136718	IMP4	0.962048	2.24808e-13	1.00271	2.15633e-09	significant	IMP U3 small nucleolar ribonucleoprotein 4
ENSG00000112658	SRF	0.961884	9.52854e-05	0.759432	3.77182e-05	significant	serum response factor
ENSG00000132185	FCRLA	0.961717	0.000221467	0.849183	0.0033789	significant	Fc receptor like A
ENSG00000169398	PTK2	0.96069	3.26536e-32	0.973639	1.66684e-23	significant	protein tyrosine kinase 2
ENSG00000108551	RASD1	0.960024	0.0242534	1.07733	0.154558	not_significant	ras related dexamethasone induced 1
ENSG00000120800	UTP20	0.959795	2.27113e-08	0.955799	2.99459e-06	significant	UTP20 small subunit processome component
ENSG00000171316	CHD7	0.95972	0.000245596	0.682244	0.12666	not_significant	chromodomain helicase DNA binding protein 7
ENSG00000155393	HEATR3	0.959347	1.24084e-12	0.904936	6.94618e-08	significant	HEAT repeat containing 3
ENSG00000106089	STX1A	0.958417	0.00851878	1.34441	3.87245e-10	significant	syntaxin 1A
ENSG00000109133	TMEM33	0.9578	2.41257e-31	0.74837	6.79872e-06	significant	transmembrane protein 33
ENSG00000160293	VAV2	0.956197	6.39185e-11	0.882893	0.000134419	significant	vav guanine nucleotide exchange factor 2
ENSG00000214114	MYCBP	0.955709	7.73576e-05	0.711617	0.0458482	significant	MYC binding protein
ENSG00000197785	ATAD3A	0.95478	3.2532e-08	0.998157	1.24022e-11	significant	ATPase family AAA domain containing 3A
ENSG00000124571	XPO5	0.954583	4.34393e-10	0.714563	7.56703e-08	significant	exportin 5
ENSG00000134987	WDR36	0.953954	5.09583e-11	0.75405	0.000808443	significant	WD repeat domain 36
ENSG00000132341	RAN	0.953692	6.33956e-11	0.816419	1.7845e-08	significant	RAN, member RAS oncogene family
ENSG00000261140		0.952703	0.017764	0.331547	0.370047	not_significant
ENSG00000145414	NAF1	0.952227	1.54373e-09	0.753654	0.0545036	not_significant	nuclear assembly factor 1 ribonucleoprotein
ENSG00000134001	EIF2S1	0.949396	2.88484e-20	0.796509	2.85946e-08	significant	eukaryotic translation initiation factor 2 subunit alpha
ENSG00000168685	IL7R	0.948734	1.69181e-07	-0.547819	0.0921389	not_significant	interleukin 7 receptor
ENSG00000153574	RPIA	0.948639	4.26306e-12	0.759928	5.86346e-09	significant	ribose 5-phosphate isomerase A
ENSG00000204152	TIMM23B	0.948119	2.80918e-12	0.87124	2.00745e-07	significant	translocase of inner mitochondrial membrane 23 homolog B
ENSG00000087269	NOP14	0.947804	9.83783e-12	0.861983	1.67298e-14	significant	NOP14 nucleolar protein
ENSG00000123505	AMD1	0.94629	0.000180718	0.858505	0.00846902	significant	adenosylmethionine decarboxylase 1
ENSG00000115109	EPB41L5	0.944342	0.000748855	0.716332	0.0103802	significant	erythrocyte membrane protein band 4.1 like 5
ENSG00000124275	MTRR	0.944334	3.51009e-15	0.84273	2.3038e-09	significant	5-methyltetrahydrofolate-homocysteine methyltransferase reductase
ENSG00000105329	TGFB1	0.943966	3.94531e-05	1.00821	0.000451879	significant	transforming growth factor beta 1
ENSG00000160256	FAM207A	0.94358	1.36711e-06	0.804182	1.5976e-09	significant	family with sequence similarity 207 member A
ENSG00000143319	ISG20L2	0.943286	1.02494e-12	0.910265	3.08363e-07	significant	interferon stimulated exonuclease gene 20 like 2
ENSG00000103194	USP10	0.941922	1.02237e-22	0.704164	2.58691e-09	significant	ubiquitin specific peptidase 10
ENSG00000152749	GPR180	0.941879	2.23257e-12	1.19636	9.49083e-08	significant	G protein-coupled receptor 180
ENSG00000152422	XRCC4	0.941753	2.30553e-05	0.53125	0.112205	not_significant	X-ray repair cross complementing 4
ENSG00000158186	MRAS	0.939808	0.00160661	1.09575	8.84252e-05	significant	muscle RAS oncogene homolog
ENSG00000107036	RIC1	0.939396	4.40569e-05	0.744858	0.000459636	significant	RIC1 homolog, RAB6A GEF complex partner 1
ENSG00000063601	MTMR1	0.938768	2.59137e-13	0.445012	0.0026513	significant	myotubularin related protein 1
ENSG00000129911	KLF16	0.938762	1.02881e-07	1.17703	1.93788e-12	significant	Kruppel like factor 16
ENSG00000120526	NUDCD1	0.938566	8.50589e-13	0.95874	5.63741e-07	significant	NudC domain containing 1
ENSG00000132467	UTP3	0.937221	4.66002e-11	0.936374	5.85834e-11	significant	UTP3 small subunit processome component
ENSG00000182541	LIMK2	0.937161	9.32193e-08	1.14852	5.19199e-11	significant	LIM domain kinase 2
ENSG00000145860	RNF145	0.937063	7.68009e-05	1.05505	4.16937e-07	significant	ring finger protein 145
ENSG00000204172	AGAP9	0.936982	1.08657e-05	0.308824	0.0201721	significant	ArfGAP with GTPase domain, ankyrin repeat and PH domain 9
ENSG00000129667	RHBDF2	0.936579	0.001836	0.794218	0.00023265	significant	rhomboid 5 homolog 2
ENSG00000114302	PRKAR2A	0.93579	2.14614e-20	0.917503	3.08215e-17	significant	protein kinase cAMP-dependent type II regulatory subunit alpha
ENSG00000067057	PFKP	0.935155	9.77986e-05	0.918306	5.39563e-07	significant	phosphofructokinase, platelet
ENSG00000140006	WDR89	0.935032	6.00404e-06	0.549686	0.116527	not_significant	WD repeat domain 89
ENSG00000269929		0.934077	0.00066203	0.769972	0.00413045	significant
ENSG00000176871	WSB2	0.933636	1.72416e-19	0.968873	3.83102e-12	significant	WD repeat and SOCS box containing 2
ENSG00000128626	MRPS12	0.933462	6.51195e-09	0.745743	9.17399e-10	significant	mitochondrial ribosomal protein S12
ENSG00000153823	PID1	0.93313	0.0273875	1.33534	2.78663e-05	significant	phosphotyrosine interaction domain containing 1
ENSG00000134909	ARHGAP32	0.932735	9.53091e-06	0.879364	0.000118417	significant	Rho GTPase activating protein 32
ENSG00000113448	PDE4D	0.932727	0.0326383	1.93626	0.0146542	significant	phosphodiesterase 4D
ENSG00000103043	VAC14	0.932553	9.96678e-06	0.263275	0.323695	not_significant	VAC14 component of PIKFYVE complex
ENSG00000185803	SLC52A2	0.932251	3.6911e-11	1.05825	4.98237e-07	significant	solute carrier family 52 member 2
ENSG00000133065	SLC41A1	0.932098	3.2788e-10	0.592911	0.000389394	significant	solute carrier family 41 member 1
ENSG00000164093	PITX2	0.931731	6.13087e-05	1.21553	0.000385252	significant	paired like homeodomain 2
ENSG00000103326	CAPN15	0.930322	2.5733e-08	0.985277	1.47018e-07	significant	calpain 15
ENSG00000164086	DUSP7	0.929766	0.00082617	1.10425	1.71626e-07	significant	dual specificity phosphatase 7
ENSG00000269343	ZNF587B	0.928665	2.36714e-07	0.814388	0.00047164	significant	zinc finger protein 587B
ENSG00000239672	NME1	0.92773	4.07764e-08	0.798222	2.51364e-09	significant	NME/NM23 nucleoside diphosphate kinase 1
ENSG00000162702	ZNF281	0.925983	0.000444328	1.01507	0.000353658	significant	zinc finger protein 281
ENSG00000132275	RRP8	0.925488	2.02964e-15	0.69977	2.31706e-06	significant	ribosomal RNA processing 8
ENSG00000188725	SMIM15	0.924939	1.82801e-15	0.776393	5.72189e-08	significant	small integral membrane protein 15
ENSG00000169032	MAP2K1	0.923966	3.36116e-09	0.780282	1.99809e-06	significant	mitogen-activated protein kinase kinase 1
ENSG00000260920		0.923923	0.000756924	0.541834	0.0568147	not_significant
ENSG00000125912	NCLN	0.923739	6.73565e-18	0.838024	2.40543e-07	significant	nicalin
ENSG00000089048	ESF1	0.923526	7.53855e-09	0.570321	0.00869154	significant	ESF1 nucleolar pre-rRNA processing protein homolog
ENSG00000133316	WDR74	0.923521	1.04883e-13	0.755981	1.50852e-07	significant	WD repeat domain 74
ENSG00000171466	ZNF562	0.921742	2.04894e-15	0.571469	0.000475581	significant	zinc finger protein 562
ENSG00000162695	SLC30A7	0.921463	3.89192e-06	0.80626	0.0003713	significant	solute carrier family 30 member 7
ENSG00000243753	HLA-L	0.916951	0.0034768	0.35627	0.360422	not_significant	major histocompatibility complex, class I, L (pseudogene)
ENSG00000130338	TULP4	0.915791	1.04256e-12	0.498981	0.000356057	significant	TUB like protein 4
ENSG00000125454	SLC25A19	0.913861	0.000944028	0.520355	0.0781758	not_significant	solute carrier family 25 member 19
ENSG00000085415	SEH1L	0.913186	4.96402e-05	0.707805	1.5168e-07	significant	SEH1 like nucleoporin
ENSG00000104689	TNFRSF10A	0.912542	0.000132103	0.722088	0.0698449	not_significant	TNF receptor superfamily member 10a
ENSG00000106636	YKT6	0.911816	3.7603e-21	0.900029	7.93604e-21	significant	YKT6 v-SNARE homolog
ENSG00000179967		0.911575	0.0113258	0.86954	0.000221057	significant
ENSG00000254726	MEX3A	0.911493	0.000273644	0.0112569	0.982655	not_significant	mex-3 RNA binding family member A
ENSG00000102572	STK24	0.911392	3.01216e-11	0.610929	4.26073e-06	significant	serine/threonine kinase 24
ENSG00000104643	MTMR9	0.911044	6.0052e-09	0.700488	5.26105e-05	significant	myotubularin related protein 9
ENSG00000106263	EIF3B	0.910528	4.42286e-19	0.840743	1.26564e-20	significant	eukaryotic translation initiation factor 3 subunit B
ENSG00000038427	VCAN	0.910364	0.00529124	1.17019	0.00194812	significant	versican
ENSG00000144136	SLC20A1	0.910069	0.0193393	1.11039	9.82297e-14	significant	solute carrier family 20 member 1
ENSG00000174871	CNIH2	0.908844	0.0359321	0.714851	0.186819	not_significant	cornichon family AMPA receptor auxiliary protein 2
ENSG00000162825	NBPF20	0.908701	9.26444e-08	0.892925	3.85127e-06	significant	NBPF member 20
ENSG00000073712	FERMT2	0.908265	0.00345433	0.815818	0.00608736	significant	fermitin family member 2
ENSG00000142556	ZNF614	0.90813	4.89983e-09	0.599739	0.0130113	significant	zinc finger protein 614
ENSG00000176641	RNF152	0.906523	0.00578643	1.27835	8.63049e-10	significant	ring finger protein 152
ENSG00000107371	EXOSC3	0.906192	2.42759e-09	0.61929	0.00391757	significant	exosome component 3
ENSG00000174013	FBXO45	0.905779	8.11741e-09	0.746349	0.000518315	significant	F-box protein 45
ENSG00000179119	SPTY2D1	0.905072	1.19277e-06	0.970804	2.70098e-05	significant	SPT2 chromatin protein domain containing 1
ENSG00000143702	CEP170	0.903827	0.000173125	1.12074	2.45735e-06	significant	centrosomal protein 170
ENSG00000088451	TGDS	0.903389	1.29126e-07	0.834588	0.00124674	significant	TDP-glucose 4,6-dehydratase
ENSG00000115816	CEBPZ	0.902199	3.88993e-12	0.645853	0.00793822	significant	CCAAT enhancer binding protein zeta
ENSG00000155330	C16orf87	0.901593	4.87525e-07	0.885392	2.06953e-09	significant	chromosome 16 open reading frame 87
ENSG00000169926	KLF13	0.899966	2.42812e-08	1.25933	2.32593e-06	significant	Kruppel like factor 13
ENSG00000138641	HERC3	0.898967	1.16561e-23	1.36488	2.78295e-25	significant	HECT and RLD domain containing E3 ubiquitin protein ligase 3
ENSG00000164430	CGAS	0.898929	0.00459611	0.961992	0.0201053	significant	cyclic GMP-AMP synthase
ENSG00000059728	MXD1	0.898456	2.44314e-05	0.430905	0.0884719	not_significant	MAX dimerization protein 1
ENSG00000102580	DNAJC3	0.898099	3.37376e-07	1.02175	0.0014623	significant	DnaJ heat shock protein family (Hsp40) member C3
ENSG00000114491	UMPS	0.897912	4.09044e-09	0.629116	0.00735836	significant	uridine monophosphate synthetase
ENSG00000182325	FBXL6	0.897377	6.66801e-07	0.720831	0.000808135	significant	F-box and leucine rich repeat protein 6
ENSG00000226380		0.897274	0.029701	1.34208	2.25519e-05	significant
ENSG00000183876	ARSI	0.896245	0.00222031	1.53161	2.92235e-10	significant	arylsulfatase family member I
ENSG00000197608	ZNF841	0.895909	3.74839e-07	0.760721	0.00297201	significant	zinc finger protein 841
ENSG00000074416	MGLL	0.895258	0.000813498	0.869345	9.07448e-05	significant	monoglyceride lipase
ENSG00000170448	NFXL1	0.894549	1.53961e-07	0.472712	0.0885507	not_significant	nuclear transcription factor, X-box binding like 1
ENSG00000104856	RELB	0.894323	0.024473	0.269253	0.341959	not_significant	RELB proto-oncogene, NF-kB subunit
ENSG00000198604	BAZ1A	0.893231	2.24638e-07	0.812054	2.70479e-06	significant	bromodomain adjacent to zinc finger domain 1A
ENSG00000162298	SYVN1	0.892109	3.285e-10	1.0669	7.51057e-05	significant	synoviolin 1
ENSG00000136875	PRPF4	0.891771	1.83731e-12	0.821091	8.40845e-05	significant	pre-mRNA processing factor 4
ENSG00000141994	DUS3L	0.891702	1.18569e-05	0.699248	3.27287e-08	significant	dihydrouridine synthase 3 like
ENSG00000107130	NCS1	0.891499	1.12617e-14	0.939323	4.05776e-11	significant	neuronal calcium sensor 1
ENSG00000236698		0.890189	5.74287e-08	0.660977	0.00255908	significant
ENSG00000197989	SNHG12	0.890102	0.000439911	0.775624	0.00155484	significant	small nucleolar RNA host gene 12
ENSG00000110172	CHORDC1	0.890097	1.93778e-17	0.804115	1.64777e-10	significant	cysteine and histidine rich domain containing 1
ENSG00000119812	FAM98A	0.889845	1.83529e-29	1.17231	3.04916e-16	significant	family with sequence similarity 98 member A
ENSG00000153201	RANBP2	0.889117	8.66875e-12	0.821541	0.00214501	significant	RAN binding protein 2
ENSG00000105556	MIER2	0.889017	2.83811e-16	1.16408	1.93026e-25	significant	MIER family member 2
ENSG00000277161	PIGW	0.888561	0.000184511	0.677779	0.00585268	significant	phosphatidylinositol glycan anchor biosynthesis class W
ENSG00000198522	GPN1	0.888058	4.82147e-05	0.678564	3.9916e-05	significant	GPN-loop GTPase 1
ENSG00000127920	GNG11	0.887121	0.00653691	1.62128	3.93013e-06	significant	G protein subunit gamma 11
ENSG00000161036	LRWD1	0.886735	9.98369e-13	0.866375	6.75156e-06	significant	leucine rich repeats and WD repeat domain containing 1
ENSG00000123643	SLC36A1	0.886667	3.7093e-06	1.36614	2.24147e-08	significant	solute carrier family 36 member 1
ENSG00000122591	FAM126A	0.886559	5.31619e-26	-0.016721	0.930925	not_significant	family with sequence similarity 126 member A
ENSG00000146731	CCT6A	0.885284	5.69288e-15	0.689902	2.30205e-07	significant	chaperonin containing TCP1 subunit 6A
ENSG00000180921	FAM83H	0.88507	0.00134229	0.874016	0.0106559	significant	family with sequence similarity 83 member H
ENSG00000179241	LDLRAD3	0.88408	6.38644e-06	0.878002	3.62979e-06	significant	low density lipoprotein receptor class A domain containing 3
ENSG00000110395	CBL	0.883701	1.31155e-09	0.822983	2.69626e-09	significant	Cbl proto-oncogene
ENSG00000182667	NTM	0.883428	0.00274682	1.13872	0.00114621	significant	neurotrimin
ENSG00000114686	MRPL3	0.883376	8.02362e-14	0.640622	4.62618e-07	significant	mitochondrial ribosomal protein L3
ENSG00000136271	DDX56	0.882334	2.93794e-17	0.742767	1.07967e-08	significant	DEAD-box helicase 56
ENSG00000139874	SSTR1	0.882029	0.000421906	0.390116	0.16744	not_significant	somatostatin receptor 1
ENSG00000108510	MED13	0.881768	2.95477e-09	0.536097	0.0108788	significant	mediator complex subunit 13
ENSG00000106305	AIMP2	0.881487	5.43903e-21	0.750296	8.48786e-07	significant	aminoacyl tRNA synthetase complex interacting multifunctional protein 2
ENSG00000166166	TRMT61A	0.881194	2.15597e-09	0.80596	0.000100628	significant	tRNA methyltransferase 61A
ENSG00000095383	TBC1D2	0.880762	0.00183555	-0.296794	0.320336	not_significant	TBC1 domain family member 2
ENSG00000265018	AGAP12P	0.880507	0.0309787	-0.246891	0.80406	not_significant	ArfGAP with GTPase domain, ankyrin repeat and PH domain 12, pseudogene
ENSG00000038382	TRIO	0.879564	4.05271e-07	0.92783	5.51397e-14	significant	trio Rho guanine nucleotide exchange factor
ENSG00000006625	GGCT	0.879074	1.25565e-08	0.434464	0.0714668	not_significant	gamma-glutamylcyclotransferase
ENSG00000161533	ACOX1	0.879001	6.44846e-06	0.508567	0.0588231	not_significant	acyl-CoA oxidase 1
ENSG00000077044	DGKD	0.876531	1.17721e-07	0.394118	0.0797342	not_significant	diacylglycerol kinase delta
ENSG00000079156	OSBPL6	0.875477	0.00178468	0.284033	0.449238	not_significant	oxysterol binding protein like 6
ENSG00000083635	NUFIP1	0.875444	8.94135e-12	0.562035	0.000326861	significant	nuclear FMR1 interacting protein 1
ENSG00000196352	CD55	0.875125	0.00258985	1.01427	5.30006e-10	significant	CD55 molecule (Cromer blood group)
ENSG00000176142	TMEM39A	0.874738	3.84993e-06	0.982521	1.00312e-05	significant	transmembrane protein 39A
ENSG00000141965	FEM1A	0.874625	2.52747e-13	0.613904	0.000406047	significant	fem-1 homolog A
ENSG00000169981	ZNF35	0.87419	3.60431e-07	0.877446	9.30621e-06	significant	zinc finger protein 35
ENSG00000244462	RBM12	0.87417	2.17904e-10	0.902933	3.26055e-12	significant	RNA binding motif protein 12
ENSG00000185619	PCGF3	0.8741	6.14005e-12	0.755443	2.33812e-13	significant	polycomb group ring finger 3
ENSG00000132773	TOE1	0.873215	1.43965e-05	0.646387	0.0722965	not_significant	target of EGR1, exonuclease
ENSG00000102886	GDPD3	0.872969	0.0419479	1.22993	0.00132303	significant	glycerophosphodiester phosphodiesterase domain containing 3
ENSG00000130935	NOL11	0.87007	2.39294e-12	0.648637	0.00197685	significant	nucleolar protein 11
ENSG00000175741		0.869356	0.0293668	0.516306	0.224561	not_significant
ENSG00000198900	TOP1	0.868734	1.82272e-13	0.985883	1.93788e-12	significant	DNA topoisomerase I
ENSG00000126903	SLC10A3	0.866998	4.41659e-12	0.830678	1.50486e-07	significant	solute carrier family 10 member 3
ENSG00000102265	TIMP1	0.865174	0.000329861	0.665626	0.00230778	significant	TIMP metallopeptidase inhibitor 1
ENSG00000180957	PITPNB	0.864521	2.88316e-13	0.885282	1.4977e-09	significant	phosphatidylinositol transfer protein beta
ENSG00000130766	SESN2	0.864405	0.00078104	-0.653899	0.0338766	significant	sestrin 2
ENSG00000125459	MSTO1	0.864298	1.47196e-10	0.858811	0.000452596	significant	misato mitochondrial distribution and morphology regulator 1
ENSG00000153207	AHCTF1	0.863412	7.1742e-09	0.755212	0.0011679	significant	AT-hook containing transcription factor 1
ENSG00000134369	NAV1	0.863323	8.54978e-13	0.681157	0.00112081	significant	neuron navigator 1
ENSG00000006634	DBF4	0.863254	0.0201827	0.460842	0.439318	not_significant	DBF4 zinc finger
ENSG00000143621	ILF2	0.862937	1.78607e-19	0.72324	1.74398e-09	significant	interleukin enhancer binding factor 2
ENSG00000144785		0.862164	0.0225596	0.360622	0.243551	not_significant
ENSG00000108561	C1QBP	0.862136	3.0486e-08	0.754276	8.49703e-12	significant	complement C1q binding protein
ENSG00000198298	ZNF485	0.861357	0.0143344	0.311583	0.568882	not_significant	zinc finger protein 485
ENSG00000153922	CHD1	0.860852	1.09842e-08	0.774793	0.00480798	significant	chromodomain helicase DNA binding protein 1
ENSG00000105245	NUMBL	0.860034	4.30343e-06	0.523821	0.0658381	not_significant	NUMB like endocytic adaptor protein
ENSG00000109220	CHIC2	0.859875	4.24086e-05	1.14747	2.65182e-17	significant	cysteine rich hydrophobic domain 2
ENSG00000158615	PPP1R15B	0.859762	0.000111254	0.592116	0.044082	significant	protein phosphatase 1 regulatory subunit 15B
ENSG00000097007	ABL1	0.859603	7.88443e-08	0.647816	0.00514384	significant	ABL proto-oncogene 1, non-receptor tyrosine kinase
ENSG00000000419	DPM1	0.858894	6.55422e-11	0.646271	0.00448907	significant	dolichyl-phosphate mannosyltransferase subunit 1, catalytic
ENSG00000136450	SRSF1	0.858809	1.30701e-17	0.745483	1.7264e-08	significant	serine and arginine rich splicing factor 1
ENSG00000122042	UBL3	0.858304	1.94182e-16	0.658441	1.17788e-10	significant	ubiquitin like 3
ENSG00000132664	POLR3F	0.857462	2.91539e-13	0.693867	0.000100382	significant	RNA polymerase III subunit F
ENSG00000119523	ALG2	0.857442	3.3515e-10	0.723713	2.31706e-06	significant	ALG2 alpha-1,3/1,6-mannosyltransferase
ENSG00000159479	MED8	0.856814	1.92744e-09	0.691385	0.000580299	significant	mediator complex subunit 8
ENSG00000130119	GNL3L	0.856777	5.82592e-12	0.698441	7.90264e-07	significant	G protein nucleolar 3 like
ENSG00000119285	HEATR1	0.855987	3.85859e-11	0.680433	9.31094e-06	significant	HEAT repeat containing 1
ENSG00000260276		0.855092	0.0132132	0.909132	0.0329559	significant
ENSG00000168924	LETM1	0.854992	1.29282e-14	0.768003	6.00936e-11	significant	leucine zipper and EF-hand containing transmembrane protein 1
ENSG00000158710	TAGLN2	0.854876	4.85926e-09	0.885656	9.88992e-08	significant	transgelin 2
ENSG00000139726	DENR	0.854828	5.31422e-15	0.66011	9.74339e-06	significant	density regulated re-initiation and release factor
ENSG00000117597	UTP25	0.85462	2.13191e-06	0.764337	9.29851e-06	significant	UTP25 small subunit processor component
ENSG00000154122	ANKH	0.854444	7.6516e-05	0.859308	0.000528415	significant	ANKH inorganic pyrophosphate transport regulator
ENSG00000081692	JMJD4	0.854125	9.07759e-12	0.70627	0.000117779	significant	jumonji domain containing 4
ENSG00000260549	MT1L	0.853678	0.0101036	0.770969	0.122558	not_significant	metallothionein 1L, pseudogene
ENSG00000198887	SMC5	0.853265	3.75533e-07	0.700812	0.000258026	significant	structural maintenance of chromosomes 5
ENSG00000173145	NOC3L	0.852566	3.22186e-05	0.767367	4.10298e-05	significant	NOC3 like DNA replication regulator
ENSG00000186230	ZNF749	0.852092	0.000578493	0.591455	0.00311681	significant	zinc finger protein 749
ENSG00000213190	MLLT11	0.851214	1.45923e-08	0.795599	0.000465326	significant	MLLT11 transcription factor 7 cofactor
ENSG00000166411	IDH3A	0.851031	6.26885e-13	0.813171	9.14769e-05	significant	isocitrate dehydrogenase (NAD(+)) 3 alpha
ENSG00000163527	STT3B	0.850823	5.45196e-13	0.708486	0.000206334	significant	STT3 oligosaccharyltransferase complex catalytic subunit B
ENSG00000114648	KLHL18	0.850754	1.82265e-13	0.805443	3.98399e-10	significant	kelch like family member 18
ENSG00000131876	SNRPA1	0.850579	1.30836e-12	0.629121	0.00413252	significant	small nuclear ribonucleoprotein polypeptide A'
ENSG00000184967	NOC4L	0.850476	2.78299e-07	0.630261	0.000138003	significant	nucleolar complex associated 4 homolog
ENSG00000090975	PITPNM2	0.850409	2.66867e-13	0.96403	4.41736e-09	significant	phosphatidylinositol transfer protein membrane associated 2
ENSG00000182224	CYB5D1	0.850095	0.00212192	0.357566	0.0513469	not_significant	cytochrome b5 domain containing 1
ENSG00000145736	GTF2H2	0.847439	1.11705e-06	0.773725	0.000846652	significant	general transcription factor IIH subunit 2
ENSG00000159217	IGF2BP1	0.847369	8.92821e-06	0.633145	6.98192e-07	significant	insulin like growth factor 2 mRNA binding protein 1
ENSG00000162980	ARL5A	0.84715	2.51643e-08	0.780984	0.000136647	significant	ADP ribosylation factor like GTPase 5A
ENSG00000130559	CAMSAP1	0.846941	3.51649e-10	0.716551	3.32544e-09	significant	calmodulin regulated spectrin associated protein 1
ENSG00000169629	RGPD8	0.846855	0.00215357	0.57821	0.0927365	not_significant	RANBP2 like and GRIP domain containing 8
ENSG00000127526	SLC35E1	0.846344	1.6641e-17	0.885742	4.076e-06	significant	solute carrier family 35 member E1
ENSG00000101463	SYNDIG1	0.845982	0.026886	0.835893	0.115799	not_significant	synapse differentiation inducing 1
ENSG00000072274	TFRC	0.845954	1.53902e-07	0.533031	0.0433179	significant	transferrin receptor
ENSG00000253161		0.845465	0.0313388	0.574775	0.0235328	significant
ENSG00000117395	EBNA1BP2	0.845243	1.17632e-06	0.794036	2.51745e-11	significant	EBNA1 binding protein 2
ENSG00000272869		0.845091	1.30975e-08	0.790079	0.000349188	significant
ENSG00000181915	ADO	0.84471	1.48754e-07	0.572916	0.0134817	significant	2-aminoethanethiol dioxygenase
ENSG00000258441	LINC00641	0.844698	1.93747e-12	0.662266	0.000249537	significant	long intergenic non-protein coding RNA 641
ENSG00000178381	ZFAND2A	0.842165	7.46611e-09	0.780822	0.000421931	significant	zinc finger AN1-type containing 2A
ENSG00000153250	RBMS1	0.842049	7.28929e-09	0.708927	1.17654e-06	significant	RNA binding motif single stranded interacting protein 1
ENSG00000186174	BCL9L	0.841989	1.92731e-06	0.987657	0.000120643	significant	BCL9 like
ENSG00000223403	MEG9	0.841514	2.81455e-05	0.747408	0.103979	not_significant	maternally expressed 9
ENSG00000223508		0.84147	0.0161548	-0.081502	0.860446	not_significant
ENSG00000188976	NOC2L	0.841106	2.26034e-09	0.811767	1.35194e-17	significant	NOC2 like nucleolar associated transcriptional repressor
ENSG00000213281	NRAS	0.840331	2.72462e-06	0.936895	3.05554e-05	significant	NRAS proto-oncogene, GTPase
ENSG00000133424	LARGE1	0.839468	9.39095e-07	0.590179	7.35989e-05	significant	LARGE xylosyl- and glucuronyltransferase 1
ENSG00000088766	CRLS1	0.83882	4.53695e-09	0.71494	0.000607047	significant	cardiolipin synthase 1
ENSG00000132434	LANCL2	0.838631	6.32223e-07	0.971068	5.69462e-09	significant	LanC like 2
ENSG00000117122	MFAP2	0.838607	5.12189e-06	0.684687	1.10133e-07	significant	microfibril associated protein 2
ENSG00000128050	PAICS	0.838061	7.19386e-09	0.705379	0.000678777	significant	phosphoribosylaminoimidazole carboxylase and phosphoribosylaminoimidazolesuccinocarboxamide synthase
ENSG00000204604	ZNF468	0.837029	1.11031e-07	0.465281	0.123678	not_significant	zinc finger protein 468
ENSG00000173917	HOXB2	0.836786	5.27836e-05	0.796694	9.84052e-12	significant	homeobox B2
ENSG00000111300	NAA25	0.836694	1.6895e-09	0.680957	0.000174311	significant	N(alpha)-acetyltransferase 25, NatB auxiliary subunit
ENSG00000177119	ANO6	0.835993	1.02531e-08	0.657697	3.4935e-06	significant	anoctamin 6
ENSG00000116120	FARSB	0.835481	2.29413e-06	0.579706	0.00389671	significant	phenylalanyl-tRNA synthetase subunit beta
ENSG00000188739	RBM34	0.835326	7.66672e-10	0.518124	0.0012212	significant	RNA binding motif protein 34
ENSG00000153391	INO80C	0.835317	0.00364697	0.651314	0.0167464	significant	INO80 complex subunit C
ENSG00000053254	FOXN3	0.835316	2.57759e-07	0.462101	0.0170168	significant	forkhead box N3
ENSG00000106682	EIF4H	0.835125	1.57656e-18	0.745234	8.20114e-13	significant	eukaryotic translation initiation factor 4H
ENSG00000153037	SRP19	0.83509	2.19353e-12	0.896534	9.67475e-07	significant	signal recognition particle 19
ENSG00000142684	ZNF593	0.83472	1.767e-05	0.699293	1.10103e-05	significant	zinc finger protein 593
ENSG00000141252	VPS53	0.834372	2.31081e-17	0.676496	3.80095e-07	significant	VPS53 subunit of GARP complex
ENSG00000183337	BCOR	0.834106	0.0309705	0.651972	0.146236	not_significant	BCL6 corepressor
ENSG00000152684	PELO	0.834003	1.95542e-17	0.863364	7.74752e-06	significant	pelota mRNA surveillance and ribosome rescue factor
ENSG00000156017	CARNMT1	0.833911	1.91258e-06	0.770749	0.000131699	significant	carnosine N-methyltransferase 1
ENSG00000162924	REL	0.833754	0.0162709	0.410031	0.522342	not_significant	REL proto-oncogene, NF-kB subunit
ENSG00000100426	ZBED4	0.833474	7.86032e-13	0.859679	4.22546e-12	significant	zinc finger BED-type containing 4
ENSG00000125354	SEPTIN6	0.833155	1.50937e-11	0.597818	0.0274999	significant	septin 6
ENSG00000167981	ZNF597	0.833014	0.000631667	0.855351	0.0004739	significant	zinc finger protein 597
ENSG00000197329	PELI1	0.832908	0.0203357	0.521949	0.0861091	not_significant	pellino E3 ubiquitin protein ligase 1
ENSG00000132463	GRSF1	0.832329	4.57924e-18	0.813183	2.34672e-15	significant	G-rich RNA sequence binding factor 1
ENSG00000111142	METAP2	0.832237	5.24086e-22	0.570302	5.81317e-07	significant	methionyl aminopeptidase 2
ENSG00000226479	TMEM185B	0.832119	3.65348e-13	0.816243	7.43897e-11	significant	transmembrane protein 185B
ENSG00000176749	CDK5R1	0.831999	0.000927762	0.623524	0.0523293	not_significant	cyclin dependent kinase 5 regulatory subunit 1
ENSG00000133773	CCDC59	0.831985	7.25259e-09	0.719127	1.46867e-06	significant	coiled-coil domain containing 59
ENSG00000158825	CDA	0.831716	0.0240687	0.672641	0.113118	not_significant	cytidine deaminase
ENSG00000171314	PGAM1	0.831519	4.30964e-20	0.525281	2.23697e-09	significant	phosphoglycerate mutase 1
ENSG00000113575	PPP2CA	0.831305	1.2934e-39	0.693529	2.10217e-07	significant	protein phosphatase 2 catalytic subunit alpha
ENSG00000124802	EEF1E1	0.831188	0.000299583	0.709355	0.00057099	significant	eukaryotic translation elongation factor 1 epsilon 1
ENSG00000132507	EIF5A	0.830608	3.48819e-12	0.748168	4.15847e-09	significant	eukaryotic translation initiation factor 5A
ENSG00000067048	DDX3Y	0.830363	1.43082e-06	0.0818166	0.957735	not_significant	DEAD-box helicase 3 Y-linked
ENSG00000116560	SFPQ	0.829951	5.79605e-16	0.674232	3.38072e-14	significant	splicing factor proline and glutamine rich
ENSG00000251079		0.829671	0.0212447	0.470268	0.0489991	significant
ENSG00000169718	DUS1L	0.828876	3.97803e-09	0.743711	9.48354e-11	significant	dihydrouridine synthase 1 like
ENSG00000170445	HARS	0.828773	3.28079e-12	0.662166	2.06303e-14	significant	histidyl-tRNA synthetase
ENSG00000213977	TAX1BP3	0.828721	8.71883e-05	0.633148	0.00459152	significant	Tax1 binding protein 3
ENSG00000206053	JPT2	0.828377	1.70916e-07	0.598355	0.0103802	significant	Jupiter microtubule associated homolog 2
ENSG00000154174	TOMM70	0.828262	1.86719e-20	0.653665	2.98874e-07	significant	translocase of outer mitochondrial membrane 70
ENSG00000120686	UFM1	0.827121	6.04104e-18	0.811592	1.1061e-06	significant	ubiquitin fold modifier 1
ENSG00000187801	ZFP69B	0.826247	0.013701	0.674695	0.0176971	significant	ZFP69 zinc finger protein B
ENSG00000083642	PDS5B	0.826158	8.66914e-10	0.753534	0.00450625	significant	PDS5 cohesin associated factor B
ENSG00000148339	SLC25A25	0.826087	0.000143432	0.55713	0.00136083	significant	solute carrier family 25 member 25
ENSG00000181163	NPM1	0.824593	8.20486e-16	0.593603	7.44565e-06	significant	nucleophosmin 1
ENSG00000171574	ZNF584	0.824589	1.34388e-10	0.729849	2.81819e-05	significant	zinc finger protein 584
ENSG00000169299	PGM2	0.824482	5.38767e-06	0.374476	0.0066515	significant	phosphoglucomutase 2
ENSG00000011304	PTBP1	0.824012	1.61671e-30	0.601051	2.68569e-08	significant	polypyrimidine tract binding protein 1
ENSG00000177189	RPS6KA3	0.823212	7.3746e-08	0.46376	0.00721477	significant	ribosomal protein S6 kinase A3
ENSG00000091127	PUS7	0.82242	6.00404e-06	0.819317	0.000161601	significant	pseudouridine synthase 7
ENSG00000147124	ZNF41	0.822127	6.3084e-15	0.673837	1.16137e-05	significant	zinc finger protein 41
ENSG00000075223	SEMA3C	0.821702	0.034879	1.17011	0.00082181	significant	semaphorin 3C
ENSG00000167747	C19orf48	0.821085	0.00999351	0.350101	0.488723	not_significant	chromosome 19 open reading frame 48
ENSG00000126261	UBA2	0.820773	1.00018e-15	0.603529	4.29692e-05	significant	ubiquitin like modifier activating enzyme 2
ENSG00000049323	LTBP1	0.820065	0.00217265	1.0607	3.95189e-06	significant	latent transforming growth factor beta binding protein 1
ENSG00000184985	SORCS2	0.819922	0.0159129	0.626431	0.0774165	not_significant	sortilin related VPS10 domain containing receptor 2
ENSG00000115756	HPCAL1	0.819814	0.00116635	1.15558	7.17275e-06	significant	hippocalcin like 1
ENSG00000155100	OTUD6B	0.819707	7.84838e-07	0.490561	0.0135557	significant	OTU domain containing 6B
ENSG00000135801	TAF5L	0.819254	6.29028e-10	0.771197	2.95221e-11	significant	TATA-box binding protein associated factor 5 like
ENSG00000078269	SYNJ2	0.81912	0.000343304	1.24359	9.59015e-14	significant	synaptojanin 2
ENSG00000128294	TPST2	0.818948	6.66185e-06	0.846991	1.93271e-09	significant	tyrosylprotein sulfotransferase 2
ENSG00000139722	VPS37B	0.818773	5.64263e-09	0.675252	0.00167491	significant	VPS37B subunit of ESCRT-I
ENSG00000168906	MAT2A	0.818496	4.30168e-06	0.631052	0.00070512	significant	methionine adenosyltransferase 2A
ENSG00000196498	NCOR2	0.8182	2.06365e-07	1.0069	1.19119e-09	significant	nuclear receptor corepressor 2
ENSG00000134815	DHX34	0.818133	1.00885e-09	0.739864	4.74185e-08	significant	DExH-box helicase 34
ENSG00000166173	LARP6	0.818112	1.31284e-31	0.620065	4.39888e-07	significant	La ribonucleoprotein domain family member 6
ENSG00000282393		0.817444	5.20651e-06	0.481131	0.00408096	significant
ENSG00000117519	CNN3	0.817391	0.000274609	0.56724	0.00978448	significant	calponin 3
ENSG00000198648	STK39	0.817322	6.81361e-10	0.91055	5.11509e-09	significant	serine/threonine kinase 39
ENSG00000205250	E2F4	0.816931	2.30055e-10	0.788224	3.26714e-12	significant	E2F transcription factor 4
ENSG00000082212	ME2	0.816517	1.56223e-11	0.403678	0.0395725	significant	malic enzyme 2
ENSG00000100596	SPTLC2	0.815831	3.6924e-06	0.995308	3.67614e-12	significant	serine palmitoyltransferase long chain base subunit 2
ENSG00000092068	SLC7A8	0.815817	0.00757155	1.32555	4.57108e-06	significant	solute carrier family 7 member 8
ENSG00000142396	ERVK3-1	0.815649	2.17283e-10	0.530326	5.95838e-07	significant	endogenous retrovirus group K3 member 1
ENSG00000162769	FLVCR1	0.81517	0.00239804	0.499932	0.00602512	significant	feline leukemia virus subgroup C cellular receptor 1
ENSG00000162885	B3GALNT2	0.814923	0.000128152	0.925842	0.000181775	significant	beta-1,3-N-acetylgalactosaminyltransferase 2
ENSG00000124145	SDC4	0.814538	0.00038416	1.23848	2.76072e-17	significant	syndecan 4
ENSG00000116704	SLC35D1	0.813146	0.000137473	0.705983	0.00024793	significant	solute carrier family 35 member D1
ENSG00000121068	TBX2	0.812873	0.00297967	1.31858	1.01281e-08	significant	T-box 2
ENSG00000135372	NAT10	0.812579	4.05066e-07	0.651699	2.75034e-07	significant	N-acetyltransferase 10
ENSG00000115884	SDC1	0.812567	0.000946033	0.956193	0.0283953	significant	syndecan 1
ENSG00000182310	SPACA6	0.81234	0.0275836	0.606815	0.295031	not_significant	sperm acrosome associated 6
ENSG00000162385	MAGOH	0.811667	2.8835e-09	0.740852	4.70336e-08	significant	mago homolog, exon junction complex subunit
ENSG00000125675	GRIA3	0.811655	0.000387902	0.98256	1.74371e-06	significant	glutamate ionotropic receptor AMPA type subunit 3
ENSG00000023909	GCLM	0.809335	0.000422462	1.16949	3.43704e-08	significant	glutamate-cysteine ligase modifier subunit
ENSG00000271147		0.808983	0.00215394	0.0662909	0.904199	not_significant
ENSG00000276116		0.808433	0.0329165	1.08505	0.00540009	significant
ENSG00000157693	TMEM268	0.808209	0.0203461	0.331547	0.417731	not_significant	transmembrane protein 268
ENSG00000058729	RIOK2	0.807753	3.10002e-14	0.785206	3.80389e-07	significant	RIO kinase 2
ENSG00000078140	UBE2K	0.80775	1.08335e-19	0.818658	9.53304e-09	significant	ubiquitin conjugating enzyme E2 K
ENSG00000084764	MAPRE3	0.806175	0.000131676	0.173477	0.181005	not_significant	microtubule associated protein RP/EB family member 3
ENSG00000086061	DNAJA1	0.805426	3.89426e-07	0.850146	2.08815e-06	significant	DnaJ heat shock protein family (Hsp40) member A1
ENSG00000151240	DIP2C	0.805113	1.9568e-06	0.599761	8.50371e-05	significant	disco interacting protein 2 homolog C
ENSG00000176903	PNMA1	0.804415	2.35977e-13	0.632663	6.26427e-08	significant	PNMA family member 1
ENSG00000108671	PSMD11	0.804407	9.33906e-22	0.688198	8.74765e-11	significant	proteasome 26S subunit, non-ATPase 11
ENSG00000112081	SRSF3	0.803646	6.16536e-08	0.792187	2.32593e-06	significant	serine and arginine rich splicing factor 3
ENSG00000197170	PSMD12	0.802374	3.36314e-14	0.649777	6.71168e-05	significant	proteasome 26S subunit, non-ATPase 12
ENSG00000213965	NUDT19	0.802264	3.18455e-14	0.800508	1.63743e-07	significant	nudix hydrolase 19
ENSG00000174574	AKIRIN1	0.801271	4.17887e-08	0.665039	1.53885e-06	significant	akirin 1
ENSG00000120137	PANK3	0.801216	3.64495e-08	0.508201	0.00402661	significant	pantothenate kinase 3
ENSG00000165637	VDAC2	0.801179	9.79991e-11	0.774249	4.52647e-15	significant	voltage dependent anion channel 2
ENSG00000242125	SNHG3	0.800853	0.00172403	0.504381	0.00628639	significant	small nucleolar RNA host gene 3
ENSG00000279267		0.800085	0.00453558	0.380977	0.453348	not_significant
ENSG00000177469	CAVIN1	0.799067	7.74237e-05	0.767306	0.000578807	significant	caveolae associated protein 1
ENSG00000175115	PACS1	0.798885	7.89634e-08	0.922864	2.82483e-06	significant	phosphofurin acidic cluster sorting protein 1
ENSG00000023171	GRAMD1B	0.798496	0.00208965	1.0451	1.24028e-08	significant	GRAM domain containing 1B
ENSG00000150630	VEGFC	0.796659	8.63517e-08	1.93667	3.00166e-29	significant	vascular endothelial growth factor C
ENSG00000013275	PSMC4	0.795793	1.9244e-14	0.674937	2.11367e-13	significant	proteasome 26S subunit, ATPase 4
ENSG00000258947	TUBB3	0.795541	0.0372291	0.962896	0.000139606	significant	tubulin beta 3 class III
ENSG00000142409	ZNF787	0.795535	6.12367e-08	0.75076	5.66244e-11	significant	zinc finger protein 787
ENSG00000101966	XIAP	0.795268	4.7034e-17	0.748142	6.3305e-09	significant	X-linked inhibitor of apoptosis
ENSG00000170464	DNAJC18	0.79516	2.3347e-08	0.600473	1.34109e-06	significant	DnaJ heat shock protein family (Hsp40) member C18
ENSG00000123094	RASSF8	0.795081	3.92347e-05	1.34123	3.15291e-11	significant	Ras association domain family member 8
ENSG00000173674	EIF1AX	0.794747	2.77415e-17	0.696757	0.00190011	significant	eukaryotic translation initiation factor 1A X-linked
ENSG00000280018		0.794123	0.0348212	-0.0281801	0.962491	not_significant
ENSG00000172315	TP53RK	0.793921	7.58457e-12	0.740458	3.39438e-09	significant	TP53 regulating kinase
ENSG00000204954	C12orf73	0.793702	1.10477e-05	0.0887171	0.788759	not_significant	chromosome 12 open reading frame 73
ENSG00000064652	SNX24	0.792955	1.50142e-08	0.67741	6.97298e-07	significant	sorting nexin 24
ENSG00000061794	MRPS35	0.792881	1.28286e-20	0.785682	1.7561e-11	significant	mitochondrial ribosomal protein S35
ENSG00000161980	POLR3K	0.792077	8.46675e-05	0.562836	0.0176971	significant	RNA polymerase III subunit K
ENSG00000198858	R3HDM4	0.79202	4.63252e-08	0.614314	0.000123278	significant	R3H domain containing 4
ENSG00000239332	LINC01119	0.791776	0.00718131	1.38044	7.61631e-09	significant	long intergenic non-protein coding RNA 1119
ENSG00000165886	UBTD1	0.791507	2.60083e-19	0.510701	0.01444	significant	ubiquitin domain containing 1
ENSG00000118246	FASTKD2	0.791502	1.19792e-15	0.372332	0.124973	not_significant	FAST kinase domains 2
ENSG00000107262	BAG1	0.7902	0.000367886	0.750555	0.000926643	significant	BCL2 associated athanogene 1
ENSG00000169627	BOLA2B	0.789709	1.83827e-05	0.656911	2.44719e-05	significant	bolA family member 2B
ENSG00000196396	PTPN1	0.789694	1.04219e-13	0.713389	5.35584e-13	significant	protein tyrosine phosphatase non-receptor type 1
ENSG00000113389	NPR3	0.789684	0.011991	0.402809	0.508549	not_significant	natriuretic peptide receptor 3
ENSG00000136478	TEX2	0.788997	1.31927e-08	0.686319	0.000205319	significant	testis expressed 2
ENSG00000197183	NOL4L	0.788851	0.0133126	1.06648	0.00241233	significant	nucleolar protein 4 like
ENSG00000131013	PPIL4	0.78708	4.1122e-18	0.74457	1.1714e-05	significant	peptidylprolyl isomerase like 4
ENSG00000006453	BAIAP2L1	0.786576	0.00111629	1.02934	2.39513e-05	significant	BAI1 associated protein 2 like 1
ENSG00000102100	SLC35A2	0.786407	4.70196e-12	0.863868	6.0104e-07	significant	solute carrier family 35 member A2
ENSG00000119401	TRIM32	0.78629	6.06196e-13	0.967511	8.33837e-18	significant	tripartite motif containing 32
ENSG00000166261	ZNF202	0.785721	8.4223e-07	0.649332	0.00014953	significant	zinc finger protein 202
ENSG00000068654	POLR1A	0.785402	3.86318e-09	0.538519	0.000101993	significant	RNA polymerase I subunit A
ENSG00000101166	PRELID3B	0.78537	1.99651e-10	0.807878	5.35191e-12	significant	PRELI domain containing 3B
ENSG00000174840	PDE12	0.78452	3.71516e-10	0.585449	0.00346874	significant	phosphodiesterase 12
ENSG00000164164	OTUD4	0.784402	3.57517e-11	0.549769	0.000375663	significant	OTU deubiquitinase 4
ENSG00000188487	INSC	0.783985	0.0025666	1.04112	0.0243602	significant	INSC spindle orientation adaptor protein
ENSG00000197312	DDI2	0.783622	2.51945e-11	0.574365	8.03244e-05	significant	DNA damage inducible 1 homolog 2
ENSG00000279827		0.783302	0.0157817	0.195133	0.555228	not_significant
ENSG00000146676	PURB	0.782972	7.92175e-06	0.734999	0.000341084	significant	purine rich element binding protein B
ENSG00000162408	NOL9	0.782683	3.8524e-08	0.682968	2.31973e-05	significant	nucleolar protein 9
ENSG00000107562	CXCL12	0.781951	2.14203e-09	0.645569	0.00324514	significant	C-X-C motif chemokine ligand 12
ENSG00000148572	NRBF2	0.781575	1.35671e-08	0.730228	8.0912e-08	significant	nuclear receptor binding factor 2
ENSG00000170485	NPAS2	0.781324	0.00960416	0.889174	0.000249774	significant	neuronal PAS domain protein 2
ENSG00000005059	MCUB	0.781313	0.00219594	0.677669	0.00140702	significant	mitochondrial calcium uniporter dominant negative beta subunit
ENSG00000104522	TSTA3	0.780061	9.71861e-16	0.665733	3.61238e-06	significant	tissue specific transplantation antigen P35B
ENSG00000148943	LIN7C	0.779973	3.80689e-11	0.651398	2.64862e-05	significant	lin-7 homolog C, crumbs cell polarity complex component
ENSG00000138035	PNPT1	0.77992	0.00145433	0.740435	0.00166152	significant	polyribonucleotide nucleotidyltransferase 1
ENSG00000174173	TRMT10C	0.7799	3.62515e-07	0.677519	3.66443e-05	significant	tRNA methyltransferase 10C, mitochondrial RNase P subunit
ENSG00000123908	AGO2	0.776777	8.51842e-06	0.636486	0.00394849	significant	argonaute RISC catalytic component 2
ENSG00000041982	TNC	0.775227	0.0382652	1.23004	0.000211854	significant	tenascin C
ENSG00000174996	KLC2	0.774478	3.12089e-14	0.812137	4.30036e-12	significant	kinesin light chain 2
ENSG00000136045	PWP1	0.774168	1.40284e-18	0.855956	6.80395e-14	significant	PWP1 homolog, endonuclein
ENSG00000106624	AEBP1	0.774132	4.38546e-10	0.619016	0.0021826	significant	AE binding protein 1
ENSG00000258232		0.773936	0.00295245	0.576552	0.0646226	not_significant
ENSG00000183054	RGPD6	0.773495	0.0074399	0.839571	0.00993711	significant	RANBP2 like and GRIP domain containing 6
ENSG00000065150	IPO5	0.773258	1.83831e-19	0.545266	0.000216229	significant	importin 5
ENSG00000065882	TBC1D1	0.771252	7.87075e-18	0.658157	1.4105e-05	significant	TBC1 domain family member 1
ENSG00000171612	SLC25A33	0.771198	6.00364e-05	0.520775	0.00105191	significant	solute carrier family 25 member 33
ENSG00000113407	TARS	0.771011	0.000280968	0.298223	0.37966	not_significant	threonyl-tRNA synthetase
ENSG00000114062	UBE3A	0.770767	1.23526e-11	0.655457	5.14327e-06	significant	ubiquitin protein ligase E3A
ENSG00000087253	LPCAT2	0.770508	6.10264e-06	0.805491	2.60087e-06	significant	lysophosphatidylcholine acyltransferase 2
ENSG00000274565		0.77011	0.0148936	0.618743	0.243144	not_significant
ENSG00000167487	KLHL26	0.770024	6.09746e-06	0.68848	0.0272315	significant	kelch like family member 26
ENSG00000158042	MRPL17	0.770012	8.28778e-06	0.82565	1.64115e-05	significant	mitochondrial ribosomal protein L17
ENSG00000072506	HSD17B10	0.769176	1.69177e-10	0.56493	6.85967e-06	significant	hydroxysteroid 17-beta dehydrogenase 10
ENSG00000099901	RANBP1	0.76909	1.70326e-07	0.610579	0.00748901	significant	RAN binding protein 1
ENSG00000130449	ZSWIM6	0.768984	1.51056e-05	0.97055	2.25491e-06	significant	zinc finger SWIM-type containing 6
ENSG00000227057	WDR46	0.768891	5.16639e-14	0.690896	5.1734e-06	significant	WD repeat domain 46
ENSG00000225648	SBDSP1	0.768876	4.26374e-05	0.711653	1.58244e-07	significant	SBDS pseudogene 1
ENSG00000115363	EVA1A	0.768778	0.00256133	1.26519	3.04277e-11	significant	eva-1 homolog A, regulator of programmed cell death
ENSG00000189306	RRP7A	0.768566	2.32043e-09	0.789581	4.68649e-13	significant	ribosomal RNA processing 7 homolog A
ENSG00000188611	ASAH2	0.766825	0.0140012	0.442546	0.345827	not_significant	N-acylsphingosine amidohydrolase 2
ENSG00000147650	LRP12	0.766476	7.20906e-05	1.01981	6.2513e-06	significant	LDL receptor related protein 12
ENSG00000168487	BMP1	0.765476	5.24763e-06	0.703877	0.000370238	significant	bone morphogenetic protein 1
ENSG00000004864	SLC25A13	0.765159	0.00499047	0.711642	0.105046	not_significant	solute carrier family 25 member 13
ENSG00000230844	ZNF674-AS1	0.765071	0.00255678	0.814329	0.00186635	significant	ZNF674 antisense RNA 1 (head to head)
ENSG00000174780	SRP72	0.765021	2.91017e-22	0.687198	8.73436e-05	significant	signal recognition particle 72
ENSG00000196715	VKORC1L1	0.764869	1.28789e-10	0.82466	0.00053537	significant	vitamin K epoxide reductase complex subunit 1 like 1
ENSG00000125775	SDCBP2	0.764698	0.0390436	0.791265	0.0284928	significant	syndecan binding protein 2
ENSG00000131015	ULBP2	0.764489	0.00148489	0.586081	0.0689067	not_significant	UL16 binding protein 2
ENSG00000140931	CMTM3	0.76437	1.74685e-14	0.594228	0.0208588	significant	CKLF like MARVEL transmembrane domain containing 3
ENSG00000102967	DHODH	0.764291	0.000536834	0.748314	0.000131969	significant	dihydroorotate dehydrogenase (quinone)
ENSG00000174177	CTU2	0.76429	6.93511e-05	0.806508	0.00251272	significant	cytosolic thiouridylase subunit 2
ENSG00000173812	EIF1	0.764023	3.84421e-10	0.478926	0.0275575	significant	eukaryotic translation initiation factor 1
ENSG00000100605	ITPK1	0.763828	4.39691e-05	0.410239	0.0123535	significant	inositol-tetrakisphosphate 1-kinase
ENSG00000272269	LOC105374952	0.76381	0.0456624	0.549204	0.132539	not_significant	uncharacterized LOC105374952
ENSG00000131016	AKAP12	0.763732	2.33899e-05	0.091345	0.883193	not_significant	A-kinase anchoring protein 12
ENSG00000129932	DOHH	0.763259	8.43936e-06	0.886297	2.02379e-09	significant	deoxyhypusine hydroxylase
ENSG00000108788	MLX	0.763253	3.61193e-12	0.753772	1.60127e-10	significant	MAX dimerization protein MLX
ENSG00000149716	LTO1	0.763098	9.51734e-10	0.639179	6.50914e-06	significant	LTO1 maturation factor of ABCE1
ENSG00000103966	EHD4	0.762516	0.0030821	0.854265	3.43183e-06	significant	EH domain containing 4
ENSG00000100591	AHSA1	0.761839	1.00634e-17	0.671973	7.62709e-09	significant	activator of HSP90 ATPase activity 1
ENSG00000197021	CXorf40B	0.761106	5.74287e-08	0.637809	8.38954e-09	significant	chromosome X open reading frame 40B
ENSG00000125870	SNRPB2	0.760202	4.37419e-12	0.701003	3.55335e-07	significant	small nuclear ribonucleoprotein polypeptide B2
ENSG00000104517	UBR5	0.759595	4.5495e-10	0.542915	3.72077e-07	significant	ubiquitin protein ligase E3 component n-recognin 5
ENSG00000163468	CCT3	0.759337	7.96047e-10	0.651593	2.27093e-18	significant	chaperonin containing TCP1 subunit 3
ENSG00000158079	PTPDC1	0.758966	1.61396e-08	0.726512	0.000782969	significant	protein tyrosine phosphatase domain containing 1
ENSG00000102390	PBDC1	0.758096	0.000155541	0.613264	5.62318e-05	significant	polysaccharide biosynthesis domain containing 1
ENSG00000115289	PCGF1	0.757494	3.71881e-09	0.841595	6.81432e-10	significant	polycomb group ring finger 1
ENSG00000276023	DUSP14	0.756744	0.00109517	0.34081	0.216707	not_significant	dual specificity phosphatase 14
ENSG00000148834	GSTO1	0.756707	0.0141072	0.921133	0.00021232	significant	glutathione S-transferase omega 1
ENSG00000114738	MAPKAPK3	0.754617	0.0263664	0.394086	0.200469	not_significant	MAPK activated protein kinase 3
ENSG00000165626	BEND7	0.754474	0.000479081	0.886579	0.000133491	significant	BEN domain containing 7
ENSG00000197948	FCHSD1	0.753803	0.00311431	0.0540127	0.885047	not_significant	FCH and double SH3 domains 1
ENSG00000102786	INTS6	0.753545	8.59921e-10	0.505973	5.62034e-05	significant	integrator complex subunit 6
ENSG00000156261	CCT8	0.753465	4.7483e-16	0.560407	3.66379e-05	significant	chaperonin containing TCP1 subunit 8
ENSG00000176845	METRNL	0.753052	0.00204123	0.540221	0.0250274	significant	meteorin like, glial cell differentiation regulator
ENSG00000185163	DDX51	0.752806	2.87359e-06	0.556732	3.286e-05	significant	DEAD-box helicase 51
ENSG00000102978	POLR2C	0.752266	6.99926e-12	0.806429	8.20114e-13	significant	RNA polymerase II subunit C
ENSG00000283515		0.75218	0.000274662	0.129519	0.663662	not_significant
ENSG00000204519	ZNF551	0.751418	6.67482e-06	0.579127	0.0264978	significant	zinc finger protein 551
ENSG00000158850	B4GALT3	0.750487	1.33579e-11	0.806349	4.9518e-14	significant	beta-1,4-galactosyltransferase 3
ENSG00000178922	HYI	0.749429	3.82214e-05	0.753647	3.72333e-06	significant	hydroxypyruvate isomerase (putative)
ENSG00000113580	NR3C1	0.748791	8.21303e-12	0.53448	0.00015732	significant	nuclear receptor subfamily 3 group C member 1
ENSG00000135249	RINT1	0.748058	3.64527e-14	0.723915	1.40831e-05	significant	RAD50 interactor 1
ENSG00000103423	DNAJA3	0.748023	7.62618e-10	0.485965	0.000388154	significant	DnaJ heat shock protein family (Hsp40) member A3
ENSG00000133612	AGAP3	0.747609	2.73173e-14	0.606283	4.61173e-05	significant	ArfGAP with GTPase domain, ankyrin repeat and PH domain 3
ENSG00000142864	SERBP1	0.747484	1.56422e-15	0.591793	1.34393e-11	significant	SERPINE1 mRNA binding protein 1
ENSG00000105186	ANKRD27	0.747305	3.05711e-10	0.627373	4.64728e-11	significant	ankyrin repeat domain 27
ENSG00000120314	WDR55	0.745674	2.52703e-13	0.734915	6.52941e-12	significant	WD repeat domain 55
ENSG00000247077	PGAM5	0.745617	4.29912e-06	0.481214	0.0509644	not_significant	PGAM family member 5, mitochondrial serine/threonine protein phosphatase
ENSG00000132432	SEC61G	0.745564	2.19358e-09	0.738845	0.000451879	significant	SEC61 translocon gamma subunit
ENSG00000182307	C8orf33	0.745089	7.1766e-12	0.490139	1.33164e-05	significant	chromosome 8 open reading frame 33
ENSG00000205664		0.745065	7.15975e-05	0.586132	1.7204e-05	significant
ENSG00000005100	DHX33	0.744243	9.06844e-16	0.665972	2.7399e-09	significant	DEAH-box helicase 33
ENSG00000140474	ULK3	0.743688	0.00324817	0.558446	0.0517025	not_significant	unc-51 like kinase 3
ENSG00000169359	SLC33A1	0.743543	0.000174149	0.925666	0.000862784	significant	solute carrier family 33 member 1
ENSG00000083520	DIS3	0.743097	5.38244e-17	0.759557	0.000299538	significant	DIS3 homolog, exosome endoribonuclease and 3'-5' exoribonuclease
ENSG00000169230	PRELID1	0.742742	3.68312e-11	0.565675	4.38469e-14	significant	PRELI domain containing 1
ENSG00000137547	MRPL15	0.742638	1.78543e-05	0.594179	0.00208035	significant	mitochondrial ribosomal protein L15
ENSG00000142046	TMEM91	0.742121	0.016772	0.257398	0.62972	not_significant	transmembrane protein 91
ENSG00000275700	AATF	0.742081	3.52142e-09	0.536749	2.15901e-05	significant	apoptosis antagonizing transcription factor
ENSG00000177311	ZBTB38	0.74194	3.93708e-05	0.669471	3.28673e-07	significant	zinc finger and BTB domain containing 38
ENSG00000058600	POLR3E	0.741028	4.07273e-13	0.642181	9.42501e-05	significant	RNA polymerase III subunit E
ENSG00000170185	USP38	0.740838	6.14354e-11	0.611147	0.000233412	significant	ubiquitin specific peptidase 38
ENSG00000178105	DDX10	0.740498	4.53157e-09	0.959938	2.85575e-06	significant	DEAD-box helicase 10
ENSG00000101367	MAPRE1	0.740421	6.92401e-12	0.697217	0.000111889	significant	microtubule associated protein RP/EB family member 1
ENSG00000144231	POLR2D	0.740382	4.46658e-10	0.607158	0.00585672	significant	RNA polymerase II subunit D
ENSG00000158023	WDR66	0.739734	0.000908542	1.0909	1.94039e-05	significant	WD repeat domain 66
ENSG00000060656	PTPRU	0.737564	0.0336976	-0.0856821	0.828965	not_significant	protein tyrosine phosphatase receptor type U
ENSG00000183684	ALYREF	0.736785	3.02356e-07	0.637322	0.000321356	significant	Aly/REF export factor
ENSG00000107651	SEC23IP	0.736645	6.23135e-26	0.763158	2.04422e-07	significant	SEC23 interacting protein
ENSG00000105676	ARMC6	0.736633	5.51892e-06	0.53846	6.5744e-05	significant	armadillo repeat containing 6
ENSG00000048405	ZNF800	0.735969	3.18229e-05	0.683016	4.92517e-05	significant	zinc finger protein 800
ENSG00000108064	TFAM	0.735527	7.0982e-06	0.438004	0.147957	not_significant	transcription factor A, mitochondrial
ENSG00000145817	YIPF5	0.735298	3.30018e-12	0.734441	1.79891e-05	significant	Yip1 domain family member 5
ENSG00000071575	TRIB2	0.734108	6.13357e-05	1.14228	0.00478924	significant	tribbles pseudokinase 2
ENSG00000114867	EIF4G1	0.733371	2.04012e-18	0.769342	1.75045e-17	significant	eukaryotic translation initiation factor 4 gamma 1
ENSG00000112137	PHACTR1	0.733343	0.0036886	0.260575	0.622942	not_significant	phosphatase and actin regulator 1
ENSG00000130706	ADRM1	0.732898	1.36029e-10	0.683122	1.08478e-08	significant	adhesion regulating molecule 1
ENSG00000213593	TMX2	0.732774	4.28435e-07	0.667028	0.00202531	significant	thioredoxin related transmembrane protein 2
ENSG00000162642	C1orf52	0.731851	4.56523e-05	0.872807	1.66914e-08	significant	chromosome 1 open reading frame 52
ENSG00000106105	GARS	0.731385	0.00265849	0.307559	0.440149	not_significant	glycyl-tRNA synthetase
ENSG00000111145	ELK3	0.730577	0.00018947	0.925583	6.53133e-14	significant	ETS transcription factor ELK3
ENSG00000131467	PSME3	0.730459	4.6923e-15	0.671521	5.64716e-12	significant	proteasome activator subunit 3
ENSG00000119630	PGF	0.730223	0.0440622	1.03446	0.00490556	significant	placental growth factor
ENSG00000163605	PPP4R2	0.729945	3.48819e-12	0.705179	1.06373e-06	significant	protein phosphatase 4 regulatory subunit 2
ENSG00000177432	NAP1L5	0.72945	5.07437e-05	0.961858	5.14272e-05	significant	nucleosome assembly protein 1 like 5
ENSG00000173457	PPP1R14B	0.729355	0.000867636	0.643685	4.81982e-09	significant	protein phosphatase 1 regulatory inhibitor subunit 14B
ENSG00000168827	GFM1	0.72906	5.65727e-17	0.612396	4.50099e-05	significant	G elongation factor mitochondrial 1
ENSG00000039123	MTREX	0.728594	7.45303e-21	0.525948	0.00199471	significant	Mtr4 exosome RNA helicase
ENSG00000117020	AKT3	0.728516	3.72951e-07	0.588961	0.0271403	significant	AKT serine/threonine kinase 3
ENSG00000143183	TMCO1	0.727739	4.25996e-10	0.583105	0.000391943	significant	transmembrane and coiled-coil domains 1
ENSG00000148120	AOPEP	0.727536	5.46768e-05	0.917661	3.64741e-05	significant	aminopeptidase O (putative)
ENSG00000160124	CCDC58	0.727398	8.71156e-07	0.625696	0.00154083	significant	coiled-coil domain containing 58
ENSG00000085231	AK6	0.727286	3.1146e-07	0.566867	0.053552	not_significant	adenylate kinase 6
ENSG00000126790	L3HYPDH	0.727	0.00342272	0.821551	0.000131816	significant	trans-L-3-hydroxyproline dehydratase
ENSG00000100410	PHF5A	0.72692	2.50952e-08	0.654849	9.18841e-05	significant	PHD finger protein 5A
ENSG00000101928	MOSPD1	0.726129	6.24608e-10	0.443973	0.0232322	significant	motile sperm domain containing 1
ENSG00000133398	MED10	0.725959	1.74758e-08	0.633291	1.95676e-08	significant	mediator complex subunit 10
ENSG00000165060	FXN	0.725911	1.08977e-06	0.512279	0.00773232	significant	frataxin
ENSG00000278791		0.725904	0.0153704	0.0784288	0.902929	not_significant
ENSG00000198093	ZNF649	0.725539	0.00072347	0.355687	0.416382	not_significant	zinc finger protein 649
ENSG00000138074	SLC5A6	0.725455	6.7301e-07	0.373565	0.0562169	not_significant	solute carrier family 5 member 6
ENSG00000116473	RAP1A	0.725187	7.88783e-12	0.459157	0.00484377	significant	RAP1A, member of RAS oncogene family
ENSG00000154582	ELOC	0.72507	3.97653e-18	0.650245	4.1792e-05	significant	elongin C
ENSG00000115233	PSMD14	0.723745	1.99641e-14	0.574392	0.000709242	significant	proteasome 26S subunit, non-ATPase 14
ENSG00000131508	UBE2D2	0.723092	2.2639e-20	0.637031	1.8158e-11	significant	ubiquitin conjugating enzyme E2 D2
ENSG00000167553	TUBA1C	0.722746	0.000173268	0.746646	0.0273267	significant	tubulin alpha 1c
ENSG00000011260	UTP18	0.722453	8.02951e-07	0.640728	1.09052e-05	significant	UTP18 small subunit processome component
ENSG00000026652	AGPAT4	0.721313	0.0013364	0.546903	0.00467297	significant	1-acylglycerol-3-phosphate O-acyltransferase 4
ENSG00000123562	MORF4L2	0.721229	1.55437e-09	0.627735	7.59072e-05	significant	mortality factor 4 like 2
ENSG00000204899	MZT1	0.721174	7.06726e-05	0.672472	0.0599653	not_significant	mitotic spindle organizing protein 1
ENSG00000265241	RBM8A	0.720948	1.14048e-19	0.590607	8.46312e-08	significant	RNA binding motif protein 8A
ENSG00000110060	PUS3	0.720739	6.00189e-07	0.349769	0.114886	not_significant	pseudouridine synthase 3
ENSG00000095139	ARCN1	0.720651	2.11521e-11	0.787076	5.96179e-06	significant	archain 1
ENSG00000166579	NDEL1	0.719635	3.19019e-05	0.961168	3.16095e-05	significant	nudE neurodevelopment protein 1 like 1
ENSG00000065548	ZC3H15	0.71927	2.13497e-08	0.548661	2.00176e-05	significant	zinc finger CCCH-type containing 15
ENSG00000168374	ARF4	0.719061	0.000100582	0.757029	0.000105137	significant	ADP ribosylation factor 4
ENSG00000125388	GRK4	0.718982	2.78177e-05	0.759632	7.38595e-06	significant	G protein-coupled receptor kinase 4
ENSG00000164244	PRRC1	0.718933	3.47284e-10	0.884416	0.000561668	significant	proline rich coiled-coil 1
ENSG00000217930	PAM16	0.71862	7.05791e-06	0.735937	2.19846e-06	significant	presequence translocase associated motor 16
ENSG00000107951	MTPAP	0.718487	2.41343e-07	0.445905	0.0297284	significant	mitochondrial poly(A) polymerase
ENSG00000113649	TCERG1	0.718356	2.96602e-14	0.649186	7.33574e-05	significant	transcription elongation regulator 1
ENSG00000196313	POM121	0.718257	2.79289e-13	0.638809	9.59102e-09	significant	POM121 transmembrane nucleoporin
ENSG00000033050	ABCF2	0.717998	3.97797e-15	0.640341	2.13506e-15	significant	ATP binding cassette subfamily F member 2
ENSG00000130311	DDA1	0.717873	3.29279e-22	0.796118	3.10713e-16	significant	DET1 and DDB1 associated 1
ENSG00000070814	TCOF1	0.717768	3.35988e-06	0.622917	0.0319057	significant	treacle ribosome biogenesis factor 1
ENSG00000163481	RNF25	0.716925	9.06096e-10	0.665387	2.94701e-12	significant	ring finger protein 25
ENSG00000137166	FOXP4	0.716884	0.000755199	0.767633	1.80953e-08	significant	forkhead box P4
ENSG00000134250	NOTCH2	0.716817	0.00062773	0.716899	0.000468924	significant	notch receptor 2
ENSG00000119661	DNAL1	0.716389	9.98766e-08	1.06776	3.73395e-07	significant	dynein axonemal light chain 1
ENSG00000155850	SLC26A2	0.715978	5.06605e-07	0.622828	0.0270529	significant	solute carrier family 26 member 2
ENSG00000073536	NLE1	0.715937	1.26337e-10	0.59072	0.000150239	significant	notchless homolog 1
ENSG00000023734	STRAP	0.715146	1.0748e-11	0.687505	4.45092e-07	significant	serine/threonine kinase receptor associated protein
ENSG00000059573	ALDH18A1	0.715126	0.000109153	0.815058	0.00120516	significant	aldehyde dehydrogenase 18 family member A1
ENSG00000173153	ESRRA	0.714835	4.13402e-07	0.523198	0.000240693	significant	estrogen related receptor alpha
ENSG00000080845	DLGAP4	0.714659	1.46288e-06	0.688573	7.74746e-08	significant	DLG associated protein 4
ENSG00000169139	UBE2V2	0.714413	3.0831e-15	0.66959	1.45297e-06	significant	ubiquitin conjugating enzyme E2 V2
ENSG00000272414	FAM47E-STBD1	0.713874	0.0252317	0.362613	0.193286	not_significant	FAM47E-STBD1 readthrough
ENSG00000159200	RCAN1	0.713849	0.0385475	0.943536	9.96738e-08	significant	regulator of calcineurin 1
ENSG00000115368	WDR75	0.713633	2.31518e-09	0.482826	0.0104461	significant	WD repeat domain 75
ENSG00000164284	GRPEL2	0.713564	0.000187467	0.496148	0.0417438	significant	GrpE like 2, mitochondrial
ENSG00000162377	COA7	0.712636	0.00012639	0.551151	0.0667131	not_significant	cytochrome c oxidase assembly factor 7 (putative)
ENSG00000120129	DUSP1	0.712191	0.0255953	1.0141	1.41594e-05	significant	dual specificity phosphatase 1
ENSG00000150753	CCT5	0.71181	2.43679e-05	0.591974	0.000228281	significant	chaperonin containing TCP1 subunit 5
ENSG00000130713	EXOSC2	0.711664	0.000172644	0.512569	0.010832	significant	exosome component 2
ENSG00000257365	FNTB	0.71158	8.1541e-11	0.529525	0.00690412	significant	farnesyltransferase, CAAX box, beta
ENSG00000168917	SLC35G2	0.711509	4.89605e-05	0.759471	0.000607356	significant	solute carrier family 35 member G2
ENSG00000117450	PRDX1	0.711263	7.24043e-17	0.707783	7.96656e-10	significant	peroxiredoxin 1
ENSG00000115145	STAM2	0.711093	0.000115767	0.681061	0.000784454	significant	signal transducing adaptor molecule 2
ENSG00000171988	JMJD1C	0.710922	1.19402e-13	0.581536	7.89832e-05	significant	jumonji domain containing 1C
ENSG00000109586	GALNT7	0.710871	2.18723e-13	0.298057	0.0198573	significant	polypeptide N-acetylgalactosaminyltransferase 7
ENSG00000100345	MYH9	0.709985	0.00838461	0.862822	9.92947e-05	significant	myosin heavy chain 9
ENSG00000055208	TAB2	0.70979	0.000182284	0.589502	0.000187883	significant	TGF-beta activated kinase 1 (MAP3K7) binding protein 2
ENSG00000108559	NUP88	0.709278	5.76112e-11	0.53827	0.00139383	significant	nucleoporin 88
ENSG00000198393	ZNF26	0.709011	2.03914e-08	0.478684	0.00256539	significant	zinc finger protein 26
ENSG00000171928	TVP23B	0.708381	1.34898e-05	0.887081	6.85155e-08	significant	trans-golgi network vesicle protein 23 homolog B
ENSG00000112242	E2F3	0.708214	8.04732e-08	0.831482	2.29475e-07	significant	E2F transcription factor 3
ENSG00000185963	BICD2	0.707951	1.24975e-11	0.756707	5.63752e-07	significant	BICD cargo adaptor 2
ENSG00000141101	NOB1	0.707641	6.14136e-09	0.448255	0.00193029	significant	NIN1 (RPN12) binding protein 1 homolog
ENSG00000176225	RTTN	0.70758	0.000456639	0.26311	0.377899	not_significant	rotatin
ENSG00000159131	GART	0.707403	1.5107e-10	0.42544	4.96538e-05	significant	phosphoribosylglycinamide formyltransferase, phosphoribosylglycinamide synthetase, phosphoribosylaminoimidazole synthetase
ENSG00000198380	GFPT1	0.707175	9.03541e-08	1.05584	1.12515e-06	significant	glutamine--fructose-6-phosphate transaminase 1
ENSG00000184182	UBE2F	0.70674	1.4223e-08	0.867775	5.05557e-18	significant	ubiquitin conjugating enzyme E2 F (putative)
ENSG00000009335	UBE3C	0.706711	1.10266e-19	0.75736	5.89115e-16	significant	ubiquitin protein ligase E3C
ENSG00000196588	MRTFA	0.706673	4.87898e-06	0.764258	2.32593e-06	significant	myocardin related transcription factor A
ENSG00000132821	VSTM2L	0.706057	0.0310819	0.813527	3.87291e-07	significant	V-set and transmembrane domain containing 2 like
ENSG00000257923	CUX1	0.705931	3.50817e-05	0.608233	0.00088728	significant	cut like homeobox 1
ENSG00000179820	MYADM	0.705841	9.96394e-05	0.957339	8.44718e-16	significant	myeloid associated differentiation marker
ENSG00000184363	PKP3	0.70576	0.00847092	-0.211789	0.654681	not_significant	plakophilin 3
ENSG00000143862	ARL8A	0.705569	1.13954e-05	0.668174	7.86743e-06	significant	ADP ribosylation factor like GTPase 8A
ENSG00000100422	CERK	0.705476	1.90421e-09	0.740133	4.00466e-18	significant	ceramide kinase
ENSG00000115520	COQ10B	0.705415	7.48522e-09	0.735019	5.81317e-07	significant	coenzyme Q10B
ENSG00000156983	BRPF1	0.70537	2.01418e-07	0.693888	3.77153e-08	significant	bromodomain and PHD finger containing 1
ENSG00000072756	TRNT1	0.705261	4.56611e-07	0.548801	9.13415e-05	significant	tRNA nucleotidyl transferase 1
ENSG00000148296	SURF6	0.704823	2.27036e-07	0.690028	2.15383e-07	significant	surfeit 6
ENSG00000183579	ZNRF3	0.704755	0.00751959	0.551471	0.205702	not_significant	zinc and ring finger 3
ENSG00000076928	ARHGEF1	0.704707	1.10272e-20	0.414874	0.000266453	significant	Rho guanine nucleotide exchange factor 1
ENSG00000126524	SBDS	0.704665	1.62852e-07	0.632596	9.86079e-08	significant	SBDS ribosome maturation factor
ENSG00000120438	TCP1	0.704492	7.76436e-29	0.597793	3.23599e-05	significant	t-complex 1
ENSG00000150687	PRSS23	0.704373	0.00038537	0.533978	0.0429253	significant	serine protease 23
ENSG00000125944	HNRNPR	0.703945	7.26351e-13	0.51829	0.00180122	significant	heterogeneous nuclear ribonucleoprotein R
ENSG00000118200	CAMSAP2	0.703725	1.63854e-07	0.489821	0.00455176	significant	calmodulin regulated spectrin associated protein family member 2
ENSG00000176014	TUBB6	0.703364	0.000274742	0.736713	6.751e-07	significant	tubulin beta 6 class V
ENSG00000143384	MCL1	0.703322	1.01048e-05	0.73078	1.17375e-05	significant	MCL1 apoptosis regulator, BCL2 family member
ENSG00000137054	POLR1E	0.702883	0.000126205	0.457303	0.00672845	significant	RNA polymerase I subunit E
ENSG00000134758	RNF138	0.702787	0.000138664	0.226991	0.450924	not_significant	ring finger protein 138
ENSG00000189114	BLOC1S3	0.702232	0.000194605	0.542415	0.00765836	significant	biogenesis of lysosomal organelles complex 1 subunit 3
ENSG00000244716		0.701726	8.09023e-05	0.360191	0.126468	not_significant
ENSG00000173933	RBM4	0.700439	2.51741e-09	0.497776	0.000531684	significant	RNA binding motif protein 4
ENSG00000197905	TEAD4	0.700207	0.00723209	0.00864432	0.976535	not_significant	TEA domain transcription factor 4
ENSG00000183576	SETD3	0.699714	1.83902e-20	0.647772	1.37854e-08	significant	SET domain containing 3, actin histidine methyltransferase
ENSG00000149100	EIF3M	0.699349	9.36839e-17	0.548853	6.33928e-05	significant	eukaryotic translation initiation factor 3 subunit M
ENSG00000144674	GOLGA4	0.698739	1.68473e-22	0.832153	0.000332363	significant	golgin A4
ENSG00000231074		0.6985	6.10041e-08	0.623853	0.0002742	significant
ENSG00000165704	HPRT1	0.698256	0.000551419	0.498407	0.0191931	significant	hypoxanthine phosphoribosyltransferase 1
ENSG00000103653	CSK	0.69694	1.76612e-08	0.572819	0.000499974	significant	C-terminal Src kinase
ENSG00000127774	EMC6	0.696132	3.97727e-09	0.630221	6.47709e-08	significant	ER membrane protein complex subunit 6
ENSG00000107020	PLGRKT	0.695795	1.12133e-06	0.396115	0.0136046	significant	plasminogen receptor with a C-terminal lysine
ENSG00000175130	MARCKSL1	0.695788	0.00018947	0.728183	0.00310781	significant	MARCKS like 1
ENSG00000164466	SFXN1	0.695165	1.31924e-11	0.865898	3.09904e-09	significant	sideroflexin 1
ENSG00000162368	CMPK1	0.693843	1.17899e-09	0.812407	5.48831e-08	significant	cytidine/uridine monophosphate kinase 1
ENSG00000118600	RXYLT1	0.693576	2.8363e-06	0.460482	0.000260781	significant	ribitol xylosyltransferase 1
ENSG00000136754	ABI1	0.693037	5.82244e-20	0.350422	0.000314929	significant	abl interactor 1
ENSG00000122482	ZNF644	0.692966	0.0141717	0.374713	0.162199	not_significant	zinc finger protein 644
ENSG00000145734	BDP1	0.69281	6.74536e-06	0.699462	0.00031857	significant	B double prime 1, subunit of RNA polymerase III transcription initiation factor IIIB
ENSG00000151239	TWF1	0.692786	3.26753e-17	0.382173	0.00760266	significant	twinfilin actin binding protein 1
ENSG00000262814	MRPL12	0.692115	5.78206e-05	0.81185	5.42305e-13	significant	mitochondrial ribosomal protein L12
ENSG00000100418	DESI1	0.692002	2.39165e-17	0.642791	4.62437e-14	significant	desumoylating isopeptidase 1
ENSG00000126749	EMG1	0.691407	1.05434e-06	0.633453	0.00269226	significant	EMG1 N1-specific pseudouridine methyltransferase
ENSG00000161813	LARP4	0.691389	1.41979e-12	0.592858	0.000931356	significant	La ribonucleoprotein domain family member 4
ENSG00000100647	SUSD6	0.690672	0.0123351	0.277894	0.465842	not_significant	sushi domain containing 6
ENSG00000106803	SEC61B	0.690589	3.2741e-07	0.65098	0.000541555	significant	SEC61 translocon beta subunit
ENSG00000100379	KCTD17	0.690461	2.11502e-08	0.688283	2.78915e-09	significant	potassium channel tetramerization domain containing 17
ENSG00000137824	RMDN3	0.689637	1.20843e-14	0.547943	5.24199e-08	significant	regulator of microtubule dynamics 3
ENSG00000077782	FGFR1	0.689367	0.000461918	0.912899	2.97395e-18	significant	fibroblast growth factor receptor 1
ENSG00000184319		0.689215	3.70003e-07	0.499611	0.000568421	significant
ENSG00000131236	CAP1	0.689113	2.42833e-07	0.664568	3.01262e-08	significant	cyclase associated actin cytoskeleton regulatory protein 1
ENSG00000180530	NRIP1	0.688997	0.000100846	0.662264	0.00144695	significant	nuclear receptor interacting protein 1
ENSG00000152377	SPOCK1	0.688725	0.00611934	0.640965	0.0158041	significant	SPARC (osteonectin), cwcv and kazal like domains proteoglycan 1
ENSG00000213588	ZBTB9	0.688653	0.000471161	0.558226	0.0322809	significant	zinc finger and BTB domain containing 9
ENSG00000073417	PDE8A	0.688158	1.66259e-11	0.61103	0.000427594	significant	phosphodiesterase 8A
ENSG00000148925	BTBD10	0.687638	1.20346e-11	0.353644	0.0110126	significant	BTB domain containing 10
ENSG00000198301	SDAD1	0.686255	4.95308e-11	0.681167	1.78527e-05	significant	SDA1 domain containing 1
ENSG00000121579	NAA50	0.686022	2.81902e-21	0.692652	0.000127191	significant	N(alpha)-acetyltransferase 50, NatE catalytic subunit
ENSG00000104524	PYCR3	0.685947	0.000201726	0.833573	1.78136e-06	significant	pyrroline-5-carboxylate reductase 3
ENSG00000130725	UBE2M	0.685728	4.97089e-14	0.672385	2.00693e-09	significant	ubiquitin conjugating enzyme E2 M
ENSG00000007376	RPUSD1	0.68562	4.3062e-05	0.436061	0.0418584	significant	RNA pseudouridine synthase domain containing 1
ENSG00000179409	GEMIN4	0.685617	1.47953e-05	0.441524	0.0565213	not_significant	gem nuclear organelle associated protein 4
ENSG00000123353	ORMDL2	0.685303	0.000152071	0.600056	4.11431e-06	significant	ORMDL sphingolipid biosynthesis regulator 2
ENSG00000228794	LINC01128	0.685054	0.000191034	0.679096	0.00204137	significant	long intergenic non-protein coding RNA 1128
ENSG00000148229	POLE3	0.684456	3.41437e-06	0.545878	0.0539115	not_significant	DNA polymerase epsilon 3, accessory subunit
ENSG00000108010	GLRX3	0.684308	4.9968e-07	0.612566	0.00120952	significant	glutaredoxin 3
ENSG00000148606	POLR3A	0.68361	6.95604e-07	0.827444	7.46208e-07	significant	RNA polymerase III subunit A
ENSG00000118985	ELL2	0.68318	0.00077398	0.738899	0.00583077	significant	elongation factor for RNA polymerase II 2
ENSG00000268043	NBPF12	0.683093	0.00640523	0.702544	0.00120715	significant	NBPF member 12
ENSG00000128891	CCDC32	0.682996	0.000126205	0.505809	0.00805115	significant	coiled-coil domain containing 32
ENSG00000112941	TENT4A	0.682979	3.12944e-05	0.708296	1.16137e-05	significant	terminal nucleotidyltransferase 4A
ENSG00000158161	EYA3	0.682375	8.76624e-14	0.482768	3.78652e-07	significant	EYA transcriptional coactivator and phosphatase 3
ENSG00000025772	TOMM34	0.682318	0.0372068	0.431363	0.160232	not_significant	translocase of outer mitochondrial membrane 34
ENSG00000156502	SUPV3L1	0.682317	2.78223e-06	0.512424	2.46799e-05	significant	Suv3 like RNA helicase
ENSG00000205485	LOC100133091	0.68189	0.00139149	0.638075	0.00857818	significant	uncharacterized LOC100133091
ENSG00000070047	PHRF1	0.681833	8.51039e-10	0.725613	2.04195e-07	significant	PHD and ring finger domains 1
ENSG00000113387	SUB1	0.68131	8.20892e-12	0.611724	0.000502444	significant	SUB1 homolog, transcriptional regulator
ENSG00000168003	SLC3A2	0.681116	8.76114e-05	0.424638	0.226894	not_significant	solute carrier family 3 member 2
ENSG00000109189	USP46	0.680198	4.35933e-06	0.212331	0.275868	not_significant	ubiquitin specific peptidase 46
ENSG00000109606	DHX15	0.679348	4.6205e-19	0.637459	5.27296e-05	significant	DEAH-box helicase 15
ENSG00000069956	MAPK6	0.67859	5.26647e-06	0.759863	9.36023e-05	significant	mitogen-activated protein kinase 6
ENSG00000185238	PRMT3	0.678472	9.13758e-05	0.306407	0.207399	not_significant	protein arginine methyltransferase 3
ENSG00000176619	LMNB2	0.678369	0.00319679	0.542031	0.178909	not_significant	lamin B2
ENSG00000010244	ZNF207	0.678366	9.86303e-25	0.521555	1.45391e-09	significant	zinc finger protein 207
ENSG00000128191	DGCR8	0.678218	2.42771e-11	0.749459	0.000775244	significant	DGCR8 microprocessor complex subunit
ENSG00000117475	BLZF1	0.678177	2.03965e-10	0.890207	7.48563e-09	significant	basic leucine zipper nuclear factor 1
ENSG00000136522	MRPL47	0.678059	5.21469e-10	0.583631	1.09727e-05	significant	mitochondrial ribosomal protein L47
ENSG00000105197	TIMM50	0.677903	9.39075e-12	0.463467	0.0014503	significant	translocase of inner mitochondrial membrane 50
ENSG00000167394	ZNF668	0.677117	3.33491e-07	0.917901	1.12583e-07	significant	zinc finger protein 668
ENSG00000107581	EIF3A	0.676953	3.42388e-15	0.564848	9.17348e-07	significant	eukaryotic translation initiation factor 3 subunit A
ENSG00000126777	KTN1	0.67695	3.88418e-34	0.661051	1.71702e-06	significant	kinectin 1
ENSG00000173726	TOMM20	0.676673	1.5497e-20	0.724373	2.44765e-08	significant	translocase of outer mitochondrial membrane 20
ENSG00000031698	SARS	0.676546	0.000352896	0.235519	0.494326	not_significant	seryl-tRNA synthetase
ENSG00000173281	PPP1R3B	0.676523	0.0336218	1.0567	0.00490556	significant	protein phosphatase 1 regulatory subunit 3B
ENSG00000180694	TMEM64	0.675847	8.4015e-09	0.649239	0.000104512	significant	transmembrane protein 64
ENSG00000168575	SLC20A2	0.675755	8.58621e-05	0.679743	0.00317967	significant	solute carrier family 20 member 2
ENSG00000163659	TIPARP	0.675429	0.0193011	0.562345	0.0971037	not_significant	TCDD inducible poly(ADP-ribose) polymerase
ENSG00000278053	DDX52	0.675293	1.18091e-14	0.324068	0.00644432	significant	DExD-box helicase 52
ENSG00000134058	CDK7	0.674298	3.8746e-05	0.827596	0.000167562	significant	cyclin dependent kinase 7
ENSG00000037749	MFAP3	0.673797	0.000113025	0.423272	0.0344196	significant	microfibril associated protein 3
ENSG00000143368	SF3B4	0.673021	2.0406e-10	0.745821	8.06379e-14	significant	splicing factor 3b subunit 4
ENSG00000155304	HSPA13	0.67301	0.000562353	0.546052	0.0993232	not_significant	heat shock protein family A (Hsp70) member 13
ENSG00000169714	CNBP	0.67219	4.6034e-14	0.541394	6.44503e-05	significant	CCHC-type zinc finger nucleic acid binding protein
ENSG00000154328	NEIL2	0.672087	1.98252e-07	0.565128	8.19239e-05	significant	nei like DNA glycosylase 2
ENSG00000134684	YARS	0.67207	0.00339551	-0.0610014	0.895442	not_significant	tyrosyl-tRNA synthetase
ENSG00000099917	MED15	0.671889	2.44706e-16	0.703455	2.20525e-10	significant	mediator complex subunit 15
ENSG00000089737	DDX24	0.671385	3.76779e-07	0.528933	0.00025628	significant	DEAD-box helicase 24
ENSG00000162458	FBLIM1	0.671131	0.00148915	0.625376	0.000374483	significant	filamin binding LIM protein 1
ENSG00000120992	LYPLA1	0.670874	3.41241e-10	0.659431	0.000594706	significant	lysophospholipase 1
ENSG00000119682	AREL1	0.670178	2.94982e-10	0.610466	9.68512e-14	significant	apoptosis resistant E3 ubiquitin protein ligase 1
ENSG00000145907	G3BP1	0.669881	7.24927e-07	0.610616	0.000699576	significant	G3BP stress granule assembly factor 1
ENSG00000056586	RC3H2	0.669665	8.2739e-06	0.622732	0.000153162	significant	ring finger and CCCH-type domains 2
ENSG00000110422	HIPK3	0.669651	0.000533171	0.512507	0.0109103	significant	homeodomain interacting protein kinase 3
ENSG00000133030	MPRIP	0.669538	4.17905e-10	0.698169	1.32487e-18	significant	myosin phosphatase Rho interacting protein
ENSG00000167881	SRP68	0.669313	5.93136e-14	0.541035	9.34847e-06	significant	signal recognition particle 68
ENSG00000100575	TIMM9	0.669048	1.39557e-08	0.431838	0.014845	significant	translocase of inner mitochondrial membrane 9
ENSG00000253837	LOC100507156	0.669006	0.0192626	0.114372	0.808009	not_significant	uncharacterized LOC100507156
ENSG00000259642		0.668985	0.000876595	0.641717	0.000133763	significant
ENSG00000130305	NSUN5	0.668796	4.27993e-07	0.408519	0.0919274	not_significant	NOP2/Sun RNA methyltransferase 5
ENSG00000168439	STIP1	0.66856	3.15186e-07	0.721756	4.1075e-07	significant	stress induced phosphoprotein 1
ENSG00000126653	NSRP1	0.668125	4.20177e-07	0.438296	4.80053e-05	significant	nuclear speckle splicing regulatory protein 1
ENSG00000188021	UBQLN2	0.667629	5.09509e-15	0.37369	5.23675e-05	significant	ubiquilin 2
ENSG00000108588	CCDC47	0.667298	1.50099e-12	0.619701	4.47564e-06	significant	coiled-coil domain containing 47
ENSG00000115091	ACTR3	0.667048	0.000159334	0.630632	0.000127452	significant	actin related protein 3
ENSG00000124217	MOCS3	0.667043	2.48523e-06	0.405342	0.0054123	significant	molybdenum cofactor synthesis 3
ENSG00000124226	RNF114	0.666701	8.28263e-05	0.614289	2.74259e-05	significant	ring finger protein 114
ENSG00000106638	TBL2	0.666407	1.11917e-09	0.738548	5.59032e-07	significant	transducin beta like 2
ENSG00000144736	SHQ1	0.666332	1.73998e-05	0.581957	0.000345443	significant	SHQ1, H/ACA ribonucleoprotein assembly factor
ENSG00000091164	TXNL1	0.66633	2.26898e-16	0.473382	0.000298604	significant	thioredoxin like 1
ENSG00000065427	KARS	0.665814	6.50473e-11	0.557753	7.74617e-13	significant	lysyl-tRNA synthetase
ENSG00000119707	RBM25	0.665275	8.22568e-14	0.632522	2.10387e-09	significant	RNA binding motif protein 25
ENSG00000133639	BTG1	0.665233	0.000345795	0.927649	1.27972e-06	significant	BTG anti-proliferation factor 1
ENSG00000184557	SOCS3	0.663493	0.0305844	0.455065	0.288331	not_significant	suppressor of cytokine signaling 3
ENSG00000163961	RNF168	0.66349	4.69116e-07	0.751952	0.000725655	significant	ring finger protein 168
ENSG00000173905	GOLIM4	0.663383	2.08945e-09	0.694536	8.54111e-08	significant	golgi integral membrane protein 4
ENSG00000018510	AGPS	0.66328	3.98894e-11	0.794051	5.03358e-05	significant	alkylglycerone phosphate synthase
ENSG00000148158	SNX30	0.66301	0.000596846	0.253799	0.350331	not_significant	sorting nexin family member 30
ENSG00000156110	ADK	0.662232	3.1609e-05	0.502857	0.00679921	significant	adenosine kinase
ENSG00000100523	DDHD1	0.661552	1.89136e-08	0.30411	0.0680188	not_significant	DDHD domain containing 1
ENSG00000188647	PTAR1	0.660819	1.49375e-08	0.465358	0.00455176	significant	protein prenyltransferase alpha subunit repeat containing 1
ENSG00000124193	SRSF6	0.660583	2.76337e-13	0.49282	1.49174e-05	significant	serine and arginine rich splicing factor 6
ENSG00000069345	DNAJA2	0.660066	9.47172e-12	0.596924	6.80607e-10	significant	DnaJ heat shock protein family (Hsp40) member A2
ENSG00000140157	NIPA2	0.659879	1.08372e-12	0.525329	0.00200878	significant	NIPA magnesium transporter 2
ENSG00000154978	VOPP1	0.65926	9.04236e-09	0.557571	0.00317041	significant	VOPP1 WW domain binding protein
ENSG00000095380	NANS	0.658561	4.0081e-06	0.5931	0.000133221	significant	N-acetylneuraminate synthase
ENSG00000159842	ABR	0.658373	0.000182925	0.251543	0.286466	not_significant	ABR activator of RhoGEF and GTPase
ENSG00000165688	PMPCA	0.657584	3.00027e-06	0.688674	4.85953e-07	significant	peptidase, mitochondrial processing alpha subunit
ENSG00000160360	GPSM1	0.657222	2.27271e-07	0.910655	3.75001e-11	significant	G protein signaling modulator 1
ENSG00000109089	CDR2L	0.656959	1.39568e-12	0.976379	7.58615e-16	significant	cerebellar degeneration related protein 2 like
ENSG00000262903		0.656367	0.0411928	0.721129	0.320336	not_significant
ENSG00000030110	BAK1	0.656189	0.00155303	0.805642	7.90532e-09	significant	BCL2 antagonist/killer 1
ENSG00000107164	FUBP3	0.656041	1.65133e-18	0.626611	8.40887e-15	significant	far upstream element binding protein 3
ENSG00000168036	CTNNB1	0.655977	2.38236e-10	0.448953	6.22877e-05	significant	catenin beta 1
ENSG00000175376	EIF1AD	0.65527	0.0376134	0.681179	0.00182381	significant	eukaryotic translation initiation factor 1A domain containing
ENSG00000004779	NDUFAB1	0.655113	9.30236e-09	0.62613	0.00221744	significant	NADH:ubiquinone oxidoreductase subunit AB1
ENSG00000280088		0.655085	0.00547816	0.701362	0.0154117	significant
ENSG00000105755	ETHE1	0.654851	2.78545e-05	0.268964	0.301944	not_significant	ETHE1 persulfide dioxygenase
ENSG00000166848	TERF2IP	0.654792	5.29314e-07	0.570553	0.000100266	significant	TERF2 interacting protein
ENSG00000110713	NUP98	0.654509	2.59829e-21	0.504851	7.56026e-06	significant	nucleoporin 98
ENSG00000204767	INSYN2B	0.654349	0.000477783	0.891016	0.00402696	significant	inhibitory synaptic factor family member 2B
ENSG00000163528	CHCHD4	0.65419	3.58487e-06	0.430957	0.0243275	significant	coiled-coil-helix-coiled-coil-helix domain containing 4
ENSG00000079313	REXO1	0.653359	9.27188e-10	0.445812	0.00139383	significant	RNA exonuclease 1 homolog
ENSG00000145431	PDGFC	0.653181	0.0120052	0.674235	0.0153282	significant	platelet derived growth factor C
ENSG00000142544	CTU1	0.653129	0.0183283	0.549686	0.0167464	significant	cytosolic thiouridylase subunit 1
ENSG00000087448	KLHL42	0.653062	3.59169e-06	0.523325	0.0117989	significant	kelch like family member 42
ENSG00000134809	TIMM10	0.652946	2.78223e-06	0.600759	0.0266209	significant	translocase of inner mitochondrial membrane 10
ENSG00000166200	COPS2	0.652612	3.21728e-07	0.622502	0.0001167	significant	COP9 signalosome subunit 2
ENSG00000188677	PARVB	0.652093	8.44441e-11	0.660477	9.40977e-16	significant	parvin beta
ENSG00000151304	SRFBP1	0.65193	3.0159e-05	0.433959	0.186006	not_significant	serum response factor binding protein 1
ENSG00000126012	KDM5C	0.651717	8.85231e-11	0.367337	0.0319057	significant	lysine demethylase 5C
ENSG00000163002	NUP35	0.651593	0.00480529	0.786453	0.0756093	not_significant	nucleoporin 35
ENSG00000105401	CDC37	0.651555	7.11923e-14	0.581039	9.18573e-09	significant	cell division cycle 37
ENSG00000120254	MTHFD1L	0.651497	6.57347e-05	0.48183	0.103019	not_significant	methylenetetrahydrofolate dehydrogenase (NADP+ dependent) 1 like
ENSG00000064102	INTS13	0.651132	1.10857e-07	0.496572	0.000456805	significant	integrator complex subunit 13
ENSG00000188342	GTF2F2	0.650491	0.000699888	0.549824	0.00104363	significant	general transcription factor IIF subunit 2
ENSG00000166012	TAF1D	0.650421	3.08883e-17	0.607573	1.05372e-05	significant	TATA-box binding protein associated factor, RNA polymerase I subunit D
ENSG00000170234	PWWP2A	0.65039	0.00438817	0.691732	2.365e-08	significant	PWWP domain containing 2A
ENSG00000100580	TMED8	0.649628	6.0981e-08	0.574324	0.00484095	significant	transmembrane p24 trafficking protein family member 8
ENSG00000090520	DNAJB11	0.649613	4.66614e-08	0.867696	0.000299903	significant	DnaJ heat shock protein family (Hsp40) member B11
ENSG00000100372	SLC25A17	0.649379	1.62767e-08	0.461437	0.00709287	significant	solute carrier family 25 member 17
ENSG00000175768	TOMM5	0.648987	2.39624e-08	0.529294	0.0337116	significant	translocase of outer mitochondrial membrane 5
ENSG00000085721	RRN3	0.648609	4.77178e-09	0.647181	4.93188e-06	significant	RRN3 homolog, RNA polymerase I transcription factor
ENSG00000115307	AUP1	0.648392	5.0133e-12	0.602467	9.67816e-05	significant	AUP1 lipid droplet regulating VLDL assembly factor
ENSG00000104691	UBXN8	0.648242	0.00012381	0.704547	1.78136e-06	significant	UBX domain protein 8
ENSG00000125835	SNRPB	0.647917	0.000223485	0.569777	0.000491413	significant	small nuclear ribonucleoprotein polypeptides B and B1
ENSG00000131791	PRKAB2	0.647874	0.000913128	0.818333	2.60513e-05	significant	protein kinase AMP-activated non-catalytic subunit beta 2
ENSG00000144048	DUSP11	0.647657	4.62534e-10	0.67055	1.02364e-06	significant	dual specificity phosphatase 11
ENSG00000129083	COPB1	0.64762	3.44306e-09	0.751812	0.000238252	significant	coatomer protein complex subunit beta 1
ENSG00000163162	RNF149	0.647313	0.00023447	0.62352	2.77019e-05	significant	ring finger protein 149
ENSG00000140497	SCAMP2	0.647129	5.04306e-21	0.56559	4.46782e-07	significant	secretory carrier membrane protein 2
ENSG00000117133	RPF1	0.646916	9.04577e-09	0.588918	0.000142109	significant	ribosome production factor 1 homolog
ENSG00000142867	BCL10	0.646562	0.00105773	0.678396	1.33192e-06	significant	BCL10 immune signaling adaptor
ENSG00000198833	UBE2J1	0.646309	6.21125e-07	0.859087	0.000626908	significant	ubiquitin conjugating enzyme E2 J1
ENSG00000008324	SS18L2	0.645746	9.03342e-05	0.332084	0.194126	not_significant	SS18 like 2
ENSG00000099246	RAB18	0.645036	1.89552e-10	0.611243	1.0409e-05	significant	RAB18, member RAS oncogene family
ENSG00000121390	PSPC1	0.644938	3.41437e-06	0.571875	4.69513e-05	significant	paraspeckle component 1
ENSG00000176624	MEX3C	0.644606	2.22734e-05	0.608487	0.0120895	significant	mex-3 RNA binding family member C
ENSG00000168175	MAPK1IP1L	0.644093	4.58853e-05	0.596445	8.53428e-07	significant	mitogen-activated protein kinase 1 interacting protein 1 like
ENSG00000138069	RAB1A	0.643755	5.74168e-10	0.733838	9.72754e-07	significant	RAB1A, member RAS oncogene family
ENSG00000041802	LSG1	0.643427	3.25169e-06	0.552735	0.00249694	significant	large 60S subunit nuclear export GTPase 1
ENSG00000131323	TRAF3	0.643078	0.0067144	0.548387	0.00993711	significant	TNF receptor associated factor 3
ENSG00000134602	STK26	0.643005	0.0429912	0.265016	0.56856	not_significant	serine/threonine kinase 26
ENSG00000167378	IRGQ	0.642767	1.66996e-06	0.506205	0.00206463	significant	immunity related GTPase Q
ENSG00000127824	TUBA4A	0.64273	0.0247677	0.637697	0.201388	not_significant	tubulin alpha 4a
ENSG00000188636	RTL6	0.642585	3.64966e-07	0.530671	0.000623269	significant	retrotransposon Gag like 6
ENSG00000165684	SNAPC4	0.642275	9.71063e-07	0.675229	0.000226343	significant	small nuclear RNA activating complex polypeptide 4
ENSG00000136848	DAB2IP	0.642151	0.00534023	0.727478	0.00138658	significant	DAB2 interacting protein
ENSG00000105671	DDX49	0.641869	7.26686e-07	0.430877	0.000200426	significant	DEAD-box helicase 49
ENSG00000142252	GEMIN7	0.641609	1.51799e-07	0.826425	9.9221e-10	significant	gem nuclear organelle associated protein 7
ENSG00000189376	C8orf76	0.641364	2.01065e-06	0.54622	0.000146394	significant	chromosome 8 open reading frame 76
ENSG00000150787	PTS	0.641308	1.13638e-08	0.934223	4.01041e-11	significant	6-pyruvoyltetrahydropterin synthase
ENSG00000164715	LMTK2	0.640827	1.46169e-08	0.259356	0.218371	not_significant	lemur tyrosine kinase 2
ENSG00000075624	ACTB	0.640691	0.0263899	0.681712	0.015469	significant	actin beta
ENSG00000161956	SENP3	0.640458	6.92066e-08	0.549387	4.9668e-05	significant	SUMO specific peptidase 3
ENSG00000047621	C12orf4	0.639812	3.28595e-09	0.583461	0.00533898	significant	chromosome 12 open reading frame 4
ENSG00000108651	UTP6	0.639753	2.90669e-09	0.663036	6.42299e-08	significant	UTP6 small subunit processome component
ENSG00000107854	TNKS2	0.639126	9.6798e-10	0.508867	0.00291222	significant	tankyrase 2
ENSG00000131263	RLIM	0.638423	1.06779e-07	0.531725	0.000906248	significant	ring finger protein, LIM domain interacting
ENSG00000075618	FSCN1	0.638239	0.0226604	0.787363	0.000810405	significant	fascin actin-bundling protein 1
ENSG00000260231	KDM7A-DT	0.638134	0.0222679	0.41161	0.268466	not_significant	KDM7A divergent transcript
ENSG00000043514	TRIT1	0.637977	8.91677e-06	0.314299	0.0464058	significant	tRNA isopentenyltransferase 1
ENSG00000184009	ACTG1	0.637045	0.0412067	0.676461	0.00898808	significant	actin gamma 1
ENSG00000085433	WDR47	0.636845	5.03415e-07	0.694414	0.00293452	significant	WD repeat domain 47
ENSG00000147274	RBMX	0.636101	2.69692e-08	0.417555	0.0628431	not_significant	RNA binding motif protein X-linked
ENSG00000168264	IRF2BP2	0.636018	0.000345654	0.723896	0.00155671	significant	interferon regulatory factor 2 binding protein 2
ENSG00000115541	HSPE1	0.635421	0.000908542	0.614147	0.00831929	significant	heat shock protein family E (Hsp10) member 1
ENSG00000115540	MOB4	0.635099	5.98576e-07	0.690641	0.000226758	significant	MOB family member 4, phocein
ENSG00000183723	CMTM4	0.634431	0.0112578	0.610637	0.0698949	not_significant	CKLF like MARVEL transmembrane domain containing 4
ENSG00000157613	CREB3L1	0.633954	0.000263813	0.605313	0.00391554	significant	cAMP responsive element binding protein 3 like 1
ENSG00000051128	HOMER3	0.632953	0.000131832	0.668641	2.11509e-05	significant	homer scaffold protein 3
ENSG00000103550	KNOP1	0.632781	2.86252e-05	0.569581	0.0167005	significant	lysine rich nucleolar protein 1
ENSG00000123178	SPRYD7	0.632621	2.32204e-05	0.773588	9.63278e-05	significant	SPRY domain containing 7
ENSG00000056097	ZFR	0.632577	9.06096e-10	0.451098	0.00891583	significant	zinc finger RNA binding protein
ENSG00000136937	NCBP1	0.63227	2.2819e-15	0.437082	0.00112059	significant	nuclear cap binding protein subunit 1
ENSG00000087087	SRRT	0.631849	1.08591e-14	0.549002	3.9578e-08	significant	serrate, RNA effector molecule
ENSG00000102172	SMS	0.631546	0.00481217	0.562777	0.000505736	significant	spermine synthase
ENSG00000100664	EIF5	0.631404	2.51664e-09	0.598976	2.67038e-06	significant	eukaryotic translation initiation factor 5
ENSG00000105127	AKAP8	0.631208	2.70084e-15	0.559498	0.000230836	significant	A-kinase anchoring protein 8
ENSG00000167635	ZNF146	0.6312	3.66119e-07	0.41464	0.0051462	significant	zinc finger protein 146
ENSG00000183751	TBL3	0.630863	4.4743e-06	0.581464	3.77182e-05	significant	transducin beta like 3
ENSG00000174943	KCTD13	0.630771	2.36733e-05	0.553067	0.00138017	significant	potassium channel tetramerization domain containing 13
ENSG00000104695	PPP2CB	0.630398	7.52348e-08	0.661082	2.82972e-05	significant	protein phosphatase 2 catalytic subunit beta
ENSG00000140367	UBE2Q2	0.629905	1.14472e-18	0.539923	4.46209e-05	significant	ubiquitin conjugating enzyme E2 Q2
ENSG00000137496	IL18BP	0.629856	0.000210836	0.442664	0.0699817	not_significant	interleukin 18 binding protein
ENSG00000085978	ATG16L1	0.629815	1.43274e-06	0.344101	0.0196199	significant	autophagy related 16 like 1
ENSG00000176853	FAM91A1	0.629716	1.24417e-11	0.54915	0.000176009	significant	family with sequence similarity 91 member A1
ENSG00000124243	BCAS4	0.629645	0.00176803	0.402891	0.0239049	significant	breast carcinoma amplified sequence 4
ENSG00000088832	FKBP1A	0.629204	6.62456e-06	0.60516	7.25191e-09	significant	FKBP prolyl isomerase 1A
ENSG00000115241	PPM1G	0.628742	5.20817e-06	0.589243	6.47579e-05	significant	protein phosphatase, Mg2+/Mn2+ dependent 1G
ENSG00000100483	VCPKMT	0.62857	0.0162518	0.652805	0.00252196	significant	valosin containing protein lysine methyltransferase
ENSG00000090020	SLC9A1	0.628488	3.54541e-07	0.647982	0.000420399	significant	solute carrier family 9 member A1
ENSG00000111364	DDX55	0.62746	3.82214e-05	0.301568	0.18113	not_significant	DEAD-box helicase 55
ENSG00000102030	NAA10	0.627047	1.01091e-05	0.575609	6.8854e-08	significant	N(alpha)-acetyltransferase 10, NatA catalytic subunit
ENSG00000119231	SENP5	0.626873	1.53468e-06	0.628242	4.13566e-05	significant	SUMO specific peptidase 5
ENSG00000185504	FAAP100	0.626862	2.09476e-07	0.424024	0.00322614	significant	FA core complex associated protein 100
ENSG00000158417	EIF5B	0.626535	5.38767e-06	0.538052	0.000392931	significant	eukaryotic translation initiation factor 5B
ENSG00000137522	RNF121	0.626463	2.78515e-08	0.599283	0.000131969	significant	ring finger protein 121
ENSG00000186567	CEACAM19	0.626049	0.0118085	0.279739	0.640218	not_significant	carcinoembryonic antigen related cell adhesion molecule 19
ENSG00000172071	EIF2AK3	0.626021	4.20886e-06	0.738052	0.00442351	significant	eukaryotic translation initiation factor 2 alpha kinase 3
ENSG00000101955	SRPX	0.62559	0.00205084	0.373717	0.0110964	significant	sushi repeat containing protein X-linked
ENSG00000160087	UBE2J2	0.625564	1.41566e-09	0.504004	3.51812e-09	significant	ubiquitin conjugating enzyme E2 J2
ENSG00000166016	ABTB2	0.624638	0.00105498	0.499956	0.0718702	not_significant	ankyrin repeat and BTB domain containing 2
ENSG00000116922	C1orf109	0.624277	4.87926e-05	0.513842	0.00782118	significant	chromosome 1 open reading frame 109
ENSG00000198252	STYX	0.623718	3.05711e-10	0.657349	0.000144136	significant	serine/threonine/tyrosine interacting protein
ENSG00000103005	USB1	0.62315	3.84758e-07	0.572225	1.97355e-06	significant	U6 snRNA biogenesis phosphodiesterase 1
ENSG00000111790	FGFR1OP2	0.622567	7.57755e-08	0.620308	0.00260878	significant	FGFR1 oncogene partner 2
ENSG00000028839	TBPL1	0.622381	7.50748e-05	0.72684	4.17157e-05	significant	TATA-box binding protein like 1
ENSG00000142186	SCYL1	0.622313	3.67015e-18	0.703918	2.45065e-07	significant	SCY1 like pseudokinase 1
ENSG00000169288	MRPL1	0.622297	9.20497e-05	0.349914	0.11441	not_significant	mitochondrial ribosomal protein L1
ENSG00000272391	POM121C	0.621405	1.36019e-12	0.467922	3.57375e-05	significant	POM121 transmembrane nucleoporin C
ENSG00000172292	CERS6	0.621211	6.1004e-13	0.473703	0.0258951	significant	ceramide synthase 6
ENSG00000185220	PGBD2	0.621131	0.0196269	0.128473	0.670841	not_significant	piggyBac transposable element derived 2
ENSG00000196591	HDAC2	0.620985	2.17335e-15	0.587888	0.000217367	significant	histone deacetylase 2
ENSG00000137996	RTCA	0.620702	1.36004e-07	0.661613	3.14934e-08	significant	RNA 3'-terminal phosphate cyclase
ENSG00000005700	IBTK	0.620558	9.4823e-05	0.877236	6.21122e-06	significant	inhibitor of Bruton tyrosine kinase
ENSG00000177302	TOP3A	0.620142	0.00133697	0.402903	0.218596	not_significant	DNA topoisomerase III alpha
ENSG00000087263	OGFOD1	0.619813	6.93425e-15	0.687744	6.74274e-06	significant	2-oxoglutarate and iron dependent oxygenase domain containing 1
ENSG00000117174	ZNHIT6	0.619308	1.40859e-09	0.662769	1.02571e-05	significant	zinc finger HIT-type containing 6
ENSG00000005238	FAM214B	0.619166	1.3827e-08	0.85825	5.33403e-21	significant	family with sequence similarity 214 member B
ENSG00000155975	VPS37A	0.619016	2.50607e-12	0.409801	0.00252839	significant	VPS37A subunit of ESCRT-I
ENSG00000112031	MTRF1L	0.618929	8.75009e-09	0.623129	4.16937e-07	significant	mitochondrial translational release factor 1 like
ENSG00000119335	SET	0.618884	2.06991e-05	0.47224	4.39898e-06	significant	SET nuclear proto-oncogene
ENSG00000196504	PRPF40A	0.618685	8.29027e-17	0.540954	3.98088e-05	significant	pre-mRNA processing factor 40 homolog A
ENSG00000151835	SACS	0.618676	0.0283881	1.08524	2.39513e-05	significant	sacsin molecular chaperone
ENSG00000166130	IKBIP	0.61851	9.9069e-05	0.661436	0.000109041	significant	IKBKB interacting protein
ENSG00000188786	MTF1	0.618245	6.21148e-07	0.510236	3.76232e-05	significant	metal regulatory transcription factor 1
ENSG00000121281	ADCY7	0.618095	6.36696e-14	0.879194	3.72077e-07	significant	adenylate cyclase 7
ENSG00000060749	QSER1	0.617787	2.92566e-07	0.481871	0.0396299	significant	glutamine and serine rich 1
ENSG00000228672	PROB1	0.617398	0.000122405	0.255669	0.542357	not_significant	proline rich basic protein 1
ENSG00000156471	PTDSS1	0.617081	7.84861e-07	0.465105	0.00843064	significant	phosphatidylserine synthase 1
ENSG00000141568	FOXK2	0.616958	5.80018e-08	0.565724	4.41387e-08	significant	forkhead box K2
ENSG00000004487	KDM1A	0.616937	7.98151e-27	0.525301	4.67635e-10	significant	lysine demethylase 1A
ENSG00000117505	DR1	0.616293	9.10339e-08	0.68688	3.72615e-12	significant	down-regulator of transcription 1
ENSG00000112159	MDN1	0.616284	0.000337715	0.477958	0.00721477	significant	midasin AAA ATPase 1
ENSG00000169016	E2F6	0.616258	7.40165e-07	0.374167	0.0409264	significant	E2F transcription factor 6
ENSG00000173465	ZNRD2	0.616034	0.00997139	0.535714	7.17101e-05	significant	zinc ribbon domain containing 2
ENSG00000155189	AGPAT5	0.616031	0.0212969	0.360295	0.431437	not_significant	1-acylglycerol-3-phosphate O-acyltransferase 5
ENSG00000065802	ASB1	0.615803	1.01725e-11	0.604422	1.11624e-08	significant	ankyrin repeat and SOCS box containing 1
ENSG00000136888	ATP6V1G1	0.615619	3.70733e-08	0.737896	3.50594e-10	significant	ATPase H+ transporting V1 subunit G1
ENSG00000114554	PLXNA1	0.615244	3.90751e-05	0.49028	0.00261165	significant	plexin A1
ENSG00000100612	DHRS7	0.615226	4.36e-09	0.520016	0.00182977	significant	dehydrogenase/reductase 7
ENSG00000169972	PUSL1	0.615018	0.00167695	0.491564	0.000981377	significant	pseudouridine synthase like 1
ENSG00000136527	TRA2B	0.61479	1.15958e-13	0.49119	1.74213e-06	significant	transformer 2 beta homolog
ENSG00000170265	ZNF282	0.61443	1.00222e-06	0.468812	0.00119039	significant	zinc finger protein 282
ENSG00000165195	PIGA	0.614416	0.00349094	0.761694	0.00273344	significant	phosphatidylinositol glycan anchor biosynthesis class A
ENSG00000129460	NGDN	0.614035	2.37808e-08	0.443911	0.00311662	significant	neuroguidin
ENSG00000100142	POLR2F	0.613157	2.22811e-06	0.507549	1.30573e-05	significant	RNA polymerase II subunit F
ENSG00000171763	SPATA5L1	0.612585	0.00092449	0.42562	0.00561173	significant	spermatogenesis associated 5 like 1
ENSG00000106635	BCL7B	0.612034	1.33439e-11	0.583587	5.88808e-07	significant	BAF chromatin remodeling complex subunit BCL7B
ENSG00000143748	NVL	0.612019	9.33509e-11	0.341845	0.0152762	significant	nuclear VCP like
ENSG00000118363	SPCS2	0.61066	3.72577e-08	0.509204	0.00888061	significant	signal peptidase complex subunit 2
ENSG00000151718	WWC2	0.610499	3.44396e-08	0.881837	3.39287e-06	significant	WW and C2 domain containing 2
ENSG00000084090	STARD7	0.610211	1.43942e-18	0.746713	1.40009e-09	significant	StAR related lipid transfer domain containing 7
ENSG00000055483	USP36	0.609846	0.000128817	0.592946	0.0315226	significant	ubiquitin specific peptidase 36
ENSG00000083812	ZNF324	0.60968	4.47671e-05	0.397419	0.0152332	significant	zinc finger protein 324
ENSG00000146109	ABT1	0.609245	2.13073e-06	0.500338	2.80276e-07	significant	activator of basal transcription 1
ENSG00000159579	RSPRY1	0.608873	1.26848e-06	0.675319	4.55426e-10	significant	ring finger and SPRY domain containing 1
ENSG00000090273	NUDC	0.608382	2.24598e-06	0.525772	0.000214272	significant	nuclear distribution C, dynein complex regulator
ENSG00000170100	ZNF778	0.608333	0.000786178	0.58974	0.00454882	significant	zinc finger protein 778
ENSG00000249353		0.608275	0.0199526	0.759108	0.00123966	significant
ENSG00000261189		0.608134	0.0396171	1.26214	0.0105952	significant
ENSG00000144583	MARCH4	0.60792	0.000429351	0.841326	0.000668611	significant	membrane associated ring-CH-type finger 4
ENSG00000144747	TMF1	0.607847	6.99118e-06	0.839154	5.80125e-05	significant	TATA element modulatory factor 1
ENSG00000116871	MAP7D1	0.607585	1.71917e-07	0.716776	6.99376e-11	significant	MAP7 domain containing 1
ENSG00000047932	GOPC	0.607213	0.00942526	1.03778	0.000175768	significant	golgi associated PDZ and coiled-coil motif containing
ENSG00000137574	TGS1	0.60681	8.66218e-11	0.521639	0.0045989	significant	trimethylguanosine synthase 1
ENSG00000143515	ATP8B2	0.606699	0.000126926	0.834544	1.40923e-07	significant	ATPase phospholipid transporting 8B2
ENSG00000139668	WDFY2	0.606479	1.55336e-08	0.748665	2.24716e-10	significant	WD repeat and FYVE domain containing 2
ENSG00000009830	POMT2	0.605939	1.04533e-13	0.515772	0.000629501	significant	protein O-mannosyltransferase 2
ENSG00000174953	DHX36	0.60567	4.25993e-09	0.372555	0.0241922	significant	DEAH-box helicase 36
ENSG00000075420	FNDC3B	0.605235	0.00280769	0.772879	0.000231794	significant	fibronectin type III domain containing 3B
ENSG00000100325	ASCC2	0.604888	1.41401e-10	0.536593	1.44466e-10	significant	activating signal cointegrator 1 complex subunit 2
ENSG00000087053	MTMR2	0.604398	6.35111e-07	0.586539	0.00342574	significant	myotubularin related protein 2
ENSG00000163933	RFT1	0.604057	6.59023e-07	0.509407	0.00104549	significant	RFT1 homolog
ENSG00000109971	HSPA8	0.60374	0.000817488	0.770843	5.38494e-05	significant	heat shock protein family A (Hsp70) member 8
ENSG00000132676	DAP3	0.603478	5.84824e-19	0.425903	1.2033e-06	significant	death associated protein 3
ENSG00000139505	MTMR6	0.603262	3.11736e-10	0.630414	0.00456422	significant	myotubularin related protein 6
ENSG00000232024		0.603101	0.00526401	0.718553	0.000133306	significant
ENSG00000104331	IMPAD1	0.602905	1.08526e-09	0.659006	5.70706e-05	significant	inositol monophosphatase domain containing 1
ENSG00000197976	AKAP17A	0.602532	1.0123e-05	0.447243	0.00762577	significant	A-kinase anchoring protein 17A
ENSG00000101911	PRPS2	0.60231	1.21211e-05	1.06205	1.36753e-06	significant	phosphoribosyl pyrophosphate synthetase 2
ENSG00000185721	DRG1	0.601696	1.40307e-17	0.530792	3.05466e-09	significant	developmentally regulated GTP binding protein 1
ENSG00000171700	RGS19	0.601565	2.89665e-05	0.73626	0.000976561	significant	regulator of G protein signaling 19
ENSG00000204514	ZNF814	0.601471	0.00347392	0.369147	0.18054	not_significant	zinc finger protein 814
ENSG00000225921	NOL7	0.601014	8.62425e-12	0.5562	1.48571e-09	significant	nucleolar protein 7
ENSG00000214517	PPME1	0.600989	1.34069e-12	0.562193	0.000177881	significant	protein phosphatase methylesterase 1
ENSG00000110080	ST3GAL4	0.599902	3.82996e-08	0.718311	0.00021022	significant	ST3 beta-galactoside alpha-2,3-sialyltransferase 4
[truncated: 2,774 more rows]

## Sheet: Δ94-97S vs Ctrl 8 h TGF-β
Full list of genes differentially regulated by TGF-b in the Control Fibroblasts versus Δ S94-97 fibroblasts after 8 hrs
Genes are significantly differentially expressed in the control cell line with an absolute log2 fold change of at least 0.5 and detected with at least 2 TPM in the control cell lines.
Genes highlighted in red are the not significant in ΔS94-97 fibroblasts and they have been shown by the heatmaps and box plots in Supplementary Figure 6. Genes in bold were validated by qPCR (Supplementary Figure 7)
		Control fibroblasts 8 h vs unstimulated		Δ S94-97 fibroblasts 8 hrs vs unstimulated
Ensembl Gene ID	Symbol	Normalized log2Fold Change	padj.	Normalized log2Fold Change	padj	significant in Δ S94-97	Gene Name
ENSG00000174792	ODAPH	9.69108	1.88213e-47	9.59532	3.59066e-38	significant	odontogenesis associated phosphoprotein
ENSG00000254275		9.2793	1.43531e-14	9.22457	9.0674e-14	significant
ENSG00000169427	KCNK9	9.07192	1.1789e-12	7.88495	2.78646e-56	significant	interleukin 11
ENSG00000167178	ISLR2	8.39925	1.09032e-17	6.26824	3.74688e-10	significant	hyaluronan synthase 1
ENSG00000159261	CLDN14	8.2151	2.53338e-09	6.3991	3.18855e-10	significant	potassium two pore domain channel subfamily K member 9
ENSG00000187180	LCE2C	7.62523	1.42758e-07	6.51556	4.89745e-12	significant	SH2 domain containing 2A
ENSG00000235636		7.43976	1.19242e-07	1.82708	1.02163e-07	not_significant	salt inducible kinase 1
ENSG00000238042	LINC02257	7.31266	4.75671e-11	3.22306	3.10879e-22	significant	solute carrier family 35 member F3
ENSG00000163202	LCE3D	7.16183	1.80307e-07	3.66079	5.98946e-08	not_significant	KN motif and ankyrin repeat domains 4
ENSG00000095752	IL11	7.1349	4.63271e-26	8.14555	4.13261e-86	significant	tetraspanin 13
ENSG00000250038		7.10325	4.70189e-09	1.63294	7.09529e-32	not_significant	calbindin 2
ENSG00000230479		7.00316	6.65275e-09	5.18957	4.06703e-14	significant
ENSG00000172137	CALB2	6.99559	1.85185e-55	7.06065	1.1382e-25	significant	claudin 4
ENSG00000174343	CHRNA9	6.99531	3.56713e-21	6.69239	5.75249e-57	significant	MIR503 host gene
ENSG00000170054	SERPINA9	6.83264	8.38565e-12	5.66289	7.00998e-09	significant	cholinergic receptor nicotinic alpha 9 subunit
ENSG00000132854	KANK4	6.80186	2.35646e-12	7.47429	2.85552e-08	significant
ENSG00000137868	STRA6	6.66933	4.28768e-28	5.54123	6.69041e-06	significant	late cornified envelope 2C
ENSG00000167874	TMEM88	6.37185	3.54189e-19	5.78219	1.65312e-05	significant	chorionic gonadotropin subunit beta 3
ENSG00000227925	LINC01655	6.23227	2.9053e-07	2.72258	2.55397e-07	not_significant
ENSG00000125845	BMP2	6.16999	2.94826e-14	5.14602	2.81649e-08	significant	claudin 14
ENSG00000124225	PMEPA1	6.14986	1.08928e-43	6.16555	4.54168e-06	significant	uncharacterized LOC105375095
ENSG00000240386	LCE1F	6.14107	1.9235e-07	2.92532	8.30701e-10	not_significant	immunoglobulin superfamily containing leucine rich repeat 2
ENSG00000223749	MIR503HG	6.09427	3.46181e-19	6.71997	3.2478e-56	significant	prostate transmembrane protein, androgen induced 1
ENSG00000134198	TSPAN2	6.03726	2.66631e-48	4.84879	1.29659e-06	significant
ENSG00000183780	SLC35F3	5.89134	5.02377e-30	7.5457	9.73452e-21	significant	transmembrane protein 88
ENSG00000156466	GDF6	5.82369	6.7725e-08	5.20471	8.74326e-10	significant	interleukin 1 receptor antagonist
ENSG00000087494	PTHLH	5.80546	3.87642e-87	4.66553	0.000198199	significant	serpin family A member 9
ENSG00000144476	ACKR3	5.7771	5.94152e-05	3.84974	1.68479e-25	significant	LIF interleukin 6 family cytokine
ENSG00000136689	IL1RN	5.75289	5.16787e-08	5.69738	2.12791e-24	significant	G protein-coupled receptor 183
ENSG00000100867	DHRS2	5.75119	4.99773e-13	3.70552	2.06587e-13	significant	stimulated by retinoic acid 6
ENSG00000105509	HAS1	5.72845	8.17213e-20	8.08495	0.000535271	significant	heparan sulfate-glucosamine 3-sulfotransferase 2
ENSG00000137033	IL33	5.69886	1.57407e-05	3.39468	4.82399e-09	significant	transforming growth factor alpha
ENSG00000169508	GPR183	5.59055	1.02613e-11	5.56798	1.4948e-18	significant	sphingosine-1-phosphate receptor 5
ENSG00000197084	LCE1C	5.46139	0.000291802	2.8501	4.38452e-21	not_significant	early growth response 2
ENSG00000189143	CLDN4	5.42904	1.88974e-20	6.77521	2.69899e-14	significant	protein phosphatase 1 regulatory inhibitor subunit 14C
ENSG00000086991	NOX4	5.36338	1.39754e-23	4.44916	9.22005e-08	significant	long intergenic non-protein coding RNA 1629
ENSG00000122877	EGR2	5.34742	4.45772e-13	5.4842	1.88657e-30	significant	LY6/PLAUR domain containing 3
ENSG00000105989	WNT2	5.25614	1.67695e-20	2.42305	5.63513e-19	significant
ENSG00000227619		5.12028	1.74177e-14	5.24541	0.000216023	significant
ENSG00000163207	IVL	5.11459	3.51783e-06	4.3182	7.70133e-08	significant	growth differentiation factor 6
ENSG00000248187		5.09594	6.60807e-23	5.03429	4.00481e-05	significant
ENSG00000115221	ITGB6	5.0937	2.9066e-29	4.84774	3.03248e-30	significant	inhibin subunit beta A
ENSG00000124466	LYPD3	5.06785	2.23816e-15	5.25936	0.000813269	significant	transgelin 3
ENSG00000101096	NFATC2	5.02472	4.39844e-27	5.13637	1.31459e-24	significant	bone morphogenetic protein 2
ENSG00000249379	LOC105375095	5.02229	4.83339e-05	6.27269	7.61563e-17	significant	nuclear factor of activated T cells 2
ENSG00000223414		5.01751	6.97566e-06	3.22931	9.12732e-46	significant	SLFNL1 antisense RNA 1
ENSG00000071282	LMCD1	4.98631	1.58876e-15	3.26472		significant	endothelial cell specific molecule 1
ENSG00000228495	LINC01013	4.98457	4.60426e-12	4.44074	5.70641e-17	significant
ENSG00000128342	LIF	4.8454	4.27842e-12	5.62632	8.52757e-18	significant	BTB domain containing 11
ENSG00000184226	PCDH9	4.75834	6.18138e-39	4.03643	2.49406e-21	significant
ENSG00000170681	CAVIN4	4.71958	8.20533e-78	4.94936	4.13261e-86	significant	caveolae associated protein 4
ENSG00000232358		4.71151	2.86613e-06	5.24324	9.63626e-16	significant
ENSG00000027869	SH2D2A	4.70916	3.6884e-12	7.66971	1.10248e-46	significant	tetraspanin 2
ENSG00000198729	PPP1R14C	4.66205	3.21476e-15	5.39718	9.43874e-13	significant	integrin subunit beta 6
ENSG00000108688	CCL7	4.62071	0.000194469	3.73423	4.00537e-14	significant	collagen type XXII alpha 1 chain
ENSG00000156427	FGF18	4.59873	8.23524e-15	0.412025	9.64304e-10	not_significant
ENSG00000113578	FGF1	4.58411	2.79367e-37	3.39335	1.40577e-05	significant
ENSG00000132510	KDM6B	4.58204	1.43584e-25	4.30465	2.40161e-31	significant	fibrinogen C domain containing 1
ENSG00000115602	IL1RL1	4.56921	1.80978e-06	3.44652	1.44896e-16	significant	parathyroid hormone like hormone
ENSG00000116690	PRG4	4.55273	2.8301e-08	2.97363	5.05164e-16	significant	salt inducible kinase 1B (putative)
ENSG00000026559	KCNG1	4.54297	4.15277e-61	4.62961	2.58763e-14	significant	heparin binding EGF like growth factor
ENSG00000136244	IL6	4.54211	4.50208e-08	4.22936	0.00223366	significant	microRNA 199a-2
ENSG00000133808		4.54075	2.62172e-21	4.07801	6.81653e-24	significant	potassium voltage-gated channel modifier subfamily G member 1
ENSG00000117479	SLC19A2	4.52476	5.43123e-83	4.56332	8.19468e-88	significant	solute carrier family 19 member 2
ENSG00000275993	SIK1B	4.51935	2.69652e-07	4.64835	2.93552e-58	significant	vascular endothelial growth factor A
ENSG00000131620	ANO1	4.47466	4.39271e-11	-0.534544	1.20468e-26	not_significant	NF-kappaB interacting lncRNA
ENSG00000278998		4.46341	0.000119095	3.97864	1.87198e-11	significant	CD274 molecule
ENSG00000278709	NKILA	4.45022	2.7192e-26	4.49355	9.71959e-08	significant
ENSG00000275927		4.44862	0.000185161	5.87043	1.87331e-05	significant	NADPH oxidase 4
ENSG00000272114		4.44316	1.19645e-12	4.9721	3.89648e-13	significant	long intergenic non-protein coding RNA 1013
ENSG00000144834	TAGLN3	4.43887	8.97733e-07	5.17305	1.70145e-19	significant	SRY-box 9
ENSG00000268942	CKS1BP3	4.43617	0.0242907	0.0379655	3.47133e-26	not_significant	nerve growth factor
ENSG00000122641	INHBA	4.4308	2.28164e-21	5.17653	4.68801e-16	significant	laminin subunit gamma 2
ENSG00000142178	SIK1	4.43024	0.000158998	7.57683	3.01762e-05	significant	involucrin
ENSG00000232679		4.35603	9.22181e-53	4.7971	2.271e-24	significant	lysine demethylase 6B
ENSG00000058085	LAMC2	4.35584	1.3085e-17	4.32573	4.32838e-08	significant	5-hydroxytryptamine receptor 2A
ENSG00000164251	F2RL1	4.34295	2.23179e-64	2.33535	5.07425e-24	significant	serpin family E member 1
ENSG00000122254	HS3ST2	4.31347	4.9384e-07	5.5221	3.97329e-23	significant	interleukin 6
ENSG00000102468	HTR2A	4.2625	1.54763e-13	4.27035	2.41165e-08	significant
ENSG00000112715	VEGFA	4.23142	7.04584e-26	4.55394	1.52703e-58	significant	angiopoietin like 4
ENSG00000143333	RGS16	4.18793	1.73069e-07	2.22057	0.00851016	significant
ENSG00000137331	IER3	4.16308	1.81174e-36	3.04747	1.00932e-63	significant	proline rich 5 like
ENSG00000106537	TSPAN13	4.16093	3.50096e-74	7.32931	5.07659e-18	significant	RASD family member 2
ENSG00000251281		4.13973	6.26995e-16	3.55214	3.55407e-15	significant	ectonucleotide pyrophosphatase/phosphodiesterase 1
ENSG00000164935	DCSTAMP	4.07274	6.25659e-06	3.77524	4.63297e-11	significant	galanin and GMAP prepropeptide
ENSG00000173702	MUC13	3.99241	5.35993e-06	2.96859	9.43622e-17	significant	FERM and PDZ domain containing 3
ENSG00000180739	S1PR5	3.92633	3.68236e-10	5.48439	9.60372e-21	significant
ENSG00000272841		3.89627	4.83442e-30	3.14596	2.61758e-33	significant	FosB proto-oncogene, AP-1 transcription factor subunit
ENSG00000125398	SOX9	3.8292	1.30066e-21	4.4007	1.06479e-17	significant
ENSG00000243225		3.82056	0.00791659	6.62363	5.07519e-14	significant
ENSG00000258976		3.81638	2.14953e-05	4.78233	2.18962e-13	significant	bone morphogenetic protein 6
ENSG00000153531	ADPRHL1	3.80674	1.85902e-24	3.5627	4.42603e-23	significant	protocadherin 9
ENSG00000120217	CD274	3.79785	4.49122e-15	4.46528	2.4016e-05	significant
ENSG00000153162	BMP6	3.78349	1.01622e-46	4.04031	1.55807e-28	significant	endothelin 1
ENSG00000164283	ESM1	3.75218	0.00103734	5.03581	1.93734e-11	not_significant	bone morphogenetic protein receptor type 1B
ENSG00000250697		3.7483	6.62762e-19	4.07039	5.53463e-39	significant	urocortin 2
ENSG00000168334	XIRP1	3.72248	0.0148144	2.31047	1.04291e-05	not_significant	C-X-C motif chemokine ligand 8
ENSG00000260810		3.70828	0.000442314	4.03159	3.89377e-09	significant
ENSG00000169436	COL22A1	3.68555	2.42386e-20	4.84477	6.3502e-21	significant	frizzled class receptor 8
ENSG00000138696	BMPR1B	3.65489	1.30119e-36	4.0039	1.24864e-07	significant	LY6/PLAUR domain containing 1
ENSG00000069482	GAL	3.64039	9.62033e-09	4.10569	3.63456e-18	significant	C-C motif chemokine ligand 2
ENSG00000100626	GALNT16	3.58138	1.77441e-32	2.64108	2.05843e-13	significant	long intergenic non-protein coding RNA 862
ENSG00000281207	SLFNL1-AS1	3.57912	3.5328e-17	5.06149	3.23479e-07	significant	atypical chemokine receptor 3
ENSG00000125740	FOSB	3.55013	1.34932e-21	4.077	1.49568e-11	significant	potassium calcium-activated channel subfamily N member 4
ENSG00000177614	PGBD5	3.54253	2.42386e-20	3.45641	2.74687e-24	significant	long intergenic non-protein coding RNA 607
ENSG00000140538	NTRK3	3.52279	3.33989e-08	1.27936	1.22832e-22	not_significant	Sp6 transcription factor
ENSG00000282849		3.51458	3.78601e-05	4.46248	8.67067e-12	significant	prostaglandin-endoperoxide synthase 2
ENSG00000135074	ADAM19	3.50697	2.85313e-38	3.29907	0.0215945	significant	chromosome 6 open reading frame 99
ENSG00000106366	SERPINE1	3.50297	2.69328e-28	4.25151	0.0103858	significant	dendrocyte expressed seven transmembrane protein
ENSG00000145040	UCN2	3.48954	2.91348e-51	4.00027	1.0273e-12	significant	RAS guanyl releasing protein 1
ENSG00000185634	SHC4	3.48644	6.41389e-15	1.2804	3.79336e-08	not_significant	C-C motif chemokine ligand 7
ENSG00000229056		3.48219	8.15899e-05	2.98194	3.52584e-07	significant	dehydrogenase/reductase 2
ENSG00000258602	LINC01629	3.44508	0.01399	5.39048	1.47552e-47	significant	xylosyltransferase 1
ENSG00000269970		3.3961	0.000207657	1.90711	5.16919e-10	significant	growth factor receptor bound protein 14
ENSG00000163235	TGFA	3.39159	1.05689e-12	5.50418		significant	late cornified envelope 3D
ENSG00000250657		3.37205	2.92741e-14	2.36756	1.0484e-14	significant	semaphorin 7A (John Milton Hagen blood group)
ENSG00000103489	XYLT1	3.36633	1.16413e-100	3.69546	1.63563e-09	significant	Wnt family member 7B
ENSG00000178860	MSC	3.36485	1.92853e-26	1.70356	7.79723e-21	significant	basonuclin 1
ENSG00000102802	MEDAG	3.36366	2.80785e-11	3.54088	0.000251495	significant
ENSG00000268941	LINC01711	3.35767	3.71881e-09	1.96598	9.44874e-32	significant	cellular communication network factor 2
ENSG00000203721	LINC00862	3.35457	1.14043e-09	3.86483	3.31053e-15	significant	ADP-ribosylhydrolase like 1
ENSG00000177283	FZD8	3.34696	3.57492e-49	3.95958	3.19336e-11	significant	neutrophil cytosolic factor 2
ENSG00000263050		3.34637	0.00991859	4.22354	5.3604e-06	significant
ENSG00000070404	FSTL3	3.34578	4.11795e-14	3.35605	3.0332e-12	significant	mesenteric estrogen dependent adipogenesis
ENSG00000132334	PTPRE	3.32747	1.94393e-10	3.45691	7.56739e-19	significant	colony stimulating factor 1 receptor
ENSG00000010438	PRSS3	3.32504	1.49971e-18	3.14363	1.76921e-14	significant	kinesin family member 26B
ENSG00000227220		3.30209	1.61463e-25	3.39583	5.1858e-34	significant	collagen type VII alpha 1 chain
ENSG00000224959		3.29092	1.15223e-11	2.44986	8.07445e-08	significant	potassium voltage-gated channel subfamily J member 15
ENSG00000114861	FOXP1	3.28765	3.95746e-287	2.82991	1.19932e-05	significant	low density lipoprotein receptor class A domain containing 4
ENSG00000118523	CCN2	3.27392	2.09098e-42	3.56541	1.38315e-06	significant	chorionic gonadotropin subunit beta 8
ENSG00000104827	CGB3	3.27265	1.6403e-08	6.51145	7.50283e-25	significant	basic helix-loop-helix family member e40
ENSG00000266709	MGC12916	3.26029	1.26704e-22	2.866	5.63044e-15	significant	chromosome 3 open reading frame 52
ENSG00000167772	ANGPTL4	3.2589	1.30836e-12	4.15693	1.23116e-14	significant	coagulation factor III, tissue factor
ENSG00000136630	HLX	3.22725	5.00789e-32	2.67258	6.84087e-13	significant	EFR3 homolog B
ENSG00000101311	FERMT1	3.21068	1.77919e-18	3.08228	8.26801e-10	significant	protein tyrosine phosphatase receptor type E
ENSG00000198805	PNP	3.20839	6.3472e-19	3.10833	0.000115268	significant	piggyBac transposable element derived 5
ENSG00000134107	BHLHE40	3.18803	2.26898e-16	3.49252	6.65651e-10	significant	lncRNA activating regulator of DKK1
ENSG00000171310	CHST11	3.17074	5.72646e-164	2.8257	9.33722e-07	significant	interleukin 1 receptor like 1
ENSG00000261488		3.16347	8.01989e-16	4.05528	4.23353e-10	significant	adhesion G protein-coupled receptor G1
ENSG00000265675		3.16181	0.000686609	6.41849	1.3024e-15	significant	myomesin 3
ENSG00000259884		3.14396	0.0081577	2.02294	7.23839e-18	significant
ENSG00000100302	RASD2	3.13636	8.7679e-15	4.11813	0.00198239	significant	interleukin 33
ENSG00000119866	BCL11A	3.13447	9.18437e-20	2.42317	7.93013e-12	significant	fibroblast growth factor 1
ENSG00000092969	TGFB2	3.13227	6.20841e-09	3.03361	9.14158e-15	significant	follistatin like 3
ENSG00000163376	KBTBD8	3.13144	1.4114e-17	3.09142	7.26419e-10	significant	linker for activation of T cells family member 2
ENSG00000173848	NET1	3.13102	2.30101e-16	3.24925	0.00954726	significant	chorionic gonadotropin subunit beta 5
ENSG00000256448		3.11992	0.00209303	3.07605	8.08793e-23	significant	dishevelled binding antagonist of beta catenin 1
ENSG00000107249	GLIS3	3.10686	1.67741e-25	2.65616	8.91175e-35	significant	ADAM metallopeptidase domain 19
ENSG00000157680	DGKI	3.1057	4.90078e-104	2.76665	1.43097e-16	significant	dystrophin related protein 2
ENSG00000165617	DACT1	3.10465	3.2513e-20	3.30731	0.000123473	significant	LIM and cysteine rich domains 1
ENSG00000277502		3.08199	0.00146884	2.72817	5.73061e-27	not_significant	heparan sulfate-glucosamine 3-sulfotransferase 3B1
ENSG00000268287		3.07589	0.00139149	6.89365	1.84874e-22	significant	neuroepithelial cell transforming 1
ENSG00000258875		3.06759	1.3862e-08	2.85716	1.28252e-18	significant	ADAM metallopeptidase with thrombospondin type 1 motif 4
ENSG00000231298	MANCR	3.06622	7.217e-09	1.76767	2.94042e-05	not_significant	chromosome 15 open reading frame 54 (putative)
ENSG00000114529	C3orf52	3.04579	2.11597e-16	3.47991	0.00879714	significant
ENSG00000090530	P3H2	3.04499	9.18926e-30	2.85913	0.00614434	significant	long intergenic non-protein coding RNA 2257
ENSG00000113070	HBEGF	3.03281	1.18646e-11	4.64068	2.80536e-40	significant	phosphoglucomutase 2 like 1
ENSG00000236094	LINC00545	3.00184	0.000610847	2.73361	1.18271e-11	significant	phosphatidylinositol specific phospholipase C X domain containing 1
ENSG00000103522	IL21R	3.00061	7.46778e-07	2.78027	1.81307e-11	significant	mex-3 RNA binding family member B
ENSG00000117525	F3	2.99544	5.00789e-32	3.47583	6.87639e-09	significant	EPH receptor B1
ENSG00000268108		2.99161	0.00120896	4.88646	5.80903e-22	significant	CTP synthase 1
ENSG00000171488	LRRC8C	2.98274	2.80201e-46	2.45725	1.92764e-20	significant	zinc finger protein 365
ENSG00000236453		2.97959	0.000193305	2.99254	5.32455e-22	significant
ENSG00000167034	NKX3-1	2.97293	5.78839e-33	2.12096	3.69502e-10	significant	serine protease 3
ENSG00000125430	HS3ST3B1	2.96953	2.32335e-44	3.25232	3.74026e-05	significant	SPHK1 interactor, AKAP domain containing
ENSG00000115290	GRB14	2.96835	2.60568e-09	3.69373	1.02911e-15	significant	GTP binding protein overexpressed in skeletal muscle
ENSG00000134259	NGF	2.96022	1.64066e-57	4.35119	1.4704e-08	significant	purine nucleoside phosphorylase
ENSG00000170961	HAS2	2.95088	3.92202e-06	2.99649	0.06826	significant
ENSG00000171246	NPTX1	2.94843	2.34297e-05	1.36742	5.79185e-17	not_significant	PR/SET domain 1
ENSG00000213412	HNRNPA1P33	2.94072	2.83853e-13	2.53301	7.15477e-11	significant	kelch repeat and BTB domain containing 8
ENSG00000208024	MIR199A2	2.93526	0.0329835	4.63145	1.98542e-18	significant	homer scaffold protein 2
ENSG00000197249	SERPINA1	2.93108	4.56675e-05	2.48397	3.35265e-14	significant	glial cell derived neurotrophic factor
ENSG00000153820	SPHKAP	2.91176	1.0892e-08	3.11117	7.58127e-08	significant	fermitin family member 1
ENSG00000270190		2.86375	1.85934e-07	2.28641	0.00136574	significant
ENSG00000136603	SKIL	2.85902	1.50147e-09	2.77576	3.16106e-29	significant	phosphatidylinositol-4,5-bisphosphate 3-kinase catalytic subunit delta
ENSG00000145555	MYO10	2.85167	9.42608e-31	2.96948	5.75249e-57	significant	immediate early response 3
ENSG00000169429	CXCL8	2.83269	0.0272175	3.99221	1.0916e-06	significant	transforming growth factor beta 2
ENSG00000171608	PIK3CD	2.81391	3.47057e-38	3.07283	0.0034192	significant	hyaluronan synthase 2
ENSG00000103942	HOMER2	2.80697	2.85745e-29	3.08836	8.57746e-10	significant
ENSG00000280721		2.8032	9.03173e-06	2.61979	1.34521e-13	significant	KIAA1755
ENSG00000157551	KCNJ15	2.7954	0.0217723	3.50973	6.63735e-06	significant
ENSG00000168621	GDNF	2.79247	4.05744e-14	3.08719	0.00122988	significant	proteoglycan 4
ENSG00000152413	HOMER1	2.79136	3.44313e-26	2.54486	1.7553e-37	significant	myosin X
ENSG00000182378	PLCXD1	2.78594	6.662e-31	3.18283	0.042524	significant	mucin 13, cell surface associated
ENSG00000140379	BCL2A1	2.78528	5.66629e-05	0.976699	1.05992e-06	not_significant	dual specificity phosphatase 4
ENSG00000276850		2.77995	1.49742e-16	1.58649	0.0982259	significant	late cornified envelope 1F
ENSG00000125637	PSD4	2.77483	9.92815e-36	2.83298	2.38687e-05	significant	ubiquitin associated and SH3 domain containing B
ENSG00000203786	KPRP	2.77244	0.0146292	1.69124	2.59557e-09	not_significant	membrane associated ring-CH-type finger 3
ENSG00000158966	CACHD1	2.76367	6.60942e-10	2.32925	9.771e-30	significant	cysteine and serine rich nuclear protein 1
ENSG00000112759	SLC29A1	2.75741	1.71325e-20	1.78441	6.53647e-17	significant	cellular communication network factor 4
ENSG00000175746	C15orf54	2.73007	0.000752703	3.23235	3.79659e-07	significant	G protein-coupled receptor 68
ENSG00000189120	SP6	2.72831	1.97224e-06	3.78746	2.83575e-11	significant	uncharacterized protein MGC12916
ENSG00000253633	LOC107986898	2.71701	9.10859e-05	2.61648	2.28831e-10	significant	solute carrier family 38 member 5
ENSG00000144655	CSRNP1	2.71608	3.33642e-12	2.89528	1.03014e-09	significant	prolyl 3-hydroxylase 2
ENSG00000103257	SLC7A5	2.71107	3.72143e-10	1.76613	3.29999e-18	significant	SEC14 like lipid binding 2
ENSG00000008513	ST3GAL1	2.69998	4.40968e-24	2.06347	9.27806e-11	significant
ENSG00000173334	TRIB1	2.69661	1.81814e-12	2.12105	2.81066e-07	significant	chorionic gonadotropin subunit beta 7
ENSG00000114270	COL7A1	2.69049	1.53282e-47	3.51797	1.65556e-11	significant	zinc finger protein 469
ENSG00000222022		2.68906	0.000181713	4.1382		significant	late cornified envelope 1C
ENSG00000057657	PRDM1	2.6865	4.72856e-09	3.09424	8.26801e-10	significant	tumor associated calcium signal transducer 2
ENSG00000100003	SEC14L2	2.68271	1.90573e-18	2.85788	0.0228627	significant	BAF chromatin remodeling complex subunit BCL11B
ENSG00000265190	ANXA8	2.68212	3.31871e-15	2.40353	1.34649e-15	significant	pleckstrin and Sec7 domain containing 4
ENSG00000073756	PTGS2	2.67969	3.05745e-12	3.78419	3.21234e-83	significant	forkhead box P1
ENSG00000144749	LRIG1	2.67965	5.82438e-10	2.1376	5.05091e-38	significant	glutamine-fructose-6-phosphate transaminase 2
ENSG00000138311	ZNF365	2.67608	1.42383e-21	3.15582	8.93603e-40	significant	carbohydrate sulfotransferase 11
ENSG00000170873	MTSS1	2.66318	1.66401e-08	2.66703	1.7399e-12	significant	pleckstrin 2
ENSG00000143179	UCK2	2.66241	4.23394e-39	2.78591	1.32326e-19	significant	uridine-cytidine kinase 2
ENSG00000225614	ZNF469	2.66173	3.03779e-10	2.85493	5.26232e-13	significant	interleukin 21 receptor
ENSG00000151136	BTBD11	2.65641	4.68661e-13	5.02082	9.63309e-11	significant	family with sequence similarity 83 member G
ENSG00000101384	JAG1	2.65601	1.46489e-08	2.32469	7.90355e-22	significant	beta-1,4-galactosyltransferase 1
ENSG00000141068	KSR1	2.64601	9.8183e-21	1.62533	2.70311e-21	significant	SKI like proto-oncogene
ENSG00000177374	HIC1	2.64311	8.63604e-13	2.47366	9.0674e-14	significant	THAP domain containing 2
ENSG00000274354		2.6316	9.82773e-07	1.5357	5.25216e-29	not_significant	diacylglycerol kinase iota
ENSG00000158125	XDH	2.62763	1.73267e-05	2.30661	7.87787e-21	significant	procollagen-lysine,2-oxoglutarate 5-dioxygenase 2
ENSG00000185972	CCIN	2.61875	2.46103e-09	2.36494	6.8154e-08	significant	interferon epsilon
ENSG00000182578	CSF1R	2.61203	1.39551e-15	3.53928	2.7912e-25	significant	activator of transcription and developmental regulator AUTS2
ENSG00000222032		2.61093	5.85139e-06	3.10222	1.05737e-09	not_significant	calcium/calmodulin dependent protein kinase kinase 1
ENSG00000178726	THBD	2.6076	6.2009e-10	0.660844	1.03222e-32	not_significant	MYC proto-oncogene, bHLH transcription factor
ENSG00000164949	GEM	2.59924	1.02358e-07	3.10846	0.00208066	significant
ENSG00000183715	OPCML	2.59186	1.86587e-08	2.46468	4.36813e-11	not_significant	heparan sulfate-glucosamine 3-sulfotransferase 3A1
ENSG00000206737	RNVU1-18	2.58921	0.00380881	1.76369	0.00579657	not_significant	long intergenic non-protein coding RNA 545
ENSG00000119714	GPR68	2.5848	0.00011849	2.87174	7.36516e-08	significant
ENSG00000279415		2.58449	2.45659e-12	2.29561	0.172142	significant
ENSG00000203711	C6orf99	2.58153	0.000307987	3.78154	0.19179	significant	long intergenic non-protein coding RNA 1655
ENSG00000169594	BNC1	2.5765	2.84148e-22	3.57034	8.05828e-11	significant	four-jointed box kinase 1
ENSG00000222041	CYTOR	2.57127	9.15118e-70	2.20555	6.71017e-10	significant	NUAK family kinase 1
ENSG00000267325		2.56197	7.0483e-10	2.47716	7.99027e-15	significant	ETS variant 3
ENSG00000004660	CAMKK1	2.56163	2.29354e-10	2.74507	6.16912e-17	significant	neurexophilin 4
ENSG00000168675	LDLRAD4	2.55904	4.9384e-07	3.50917	6.61947e-06	significant	androgen dependent TFPI regulating protein
ENSG00000139116	KIF21A	2.55666	3.59328e-26	2.54867	3.34656e-06	significant	platelet derived growth factor subunit A
ENSG00000144596	GRIP2	2.55235	4.89605e-05	1.74268	1.01093e-05	significant	interleukin 12A
ENSG00000262454		2.5476	5.06564e-12	2.00985	1.73112e-57	significant	H2.0 like homeobox
ENSG00000240583	AQP1	2.54753	2.40634e-06	1.96243	7.42521e-09	significant	MTSS I-BAR domain containing 1
ENSG00000189052	CGB5	2.54268	8.35275e-09	3.31347	4.36749e-09	significant	TIMP metallopeptidase inhibitor 3
ENSG00000054967	RELT	2.54091	9.64118e-20	2.63987	5.84706e-14	significant	tuftelin 1
ENSG00000108691	CCL2	2.53216	0.00358076	3.89469	4.49619e-17	significant	GLIS family zinc finger 3
ENSG00000273760		2.52652	1.29148e-05	2.73076	9.45613e-24	significant	phosphoribosyl pyrophosphate synthetase 1
ENSG00000102755	FLT1	2.5259	1.71224e-15	1.29547	9.6781e-11	significant	polypeptide N-acetylgalactosaminyltransferase 16
ENSG00000008056	SYN1	2.5003	1.26029e-17	2.54847	1.48119e-16	significant	RELT TNF receptor
ENSG00000231131	LNCAROD	2.48959	6.2492e-08	3.44703	3.44486e-13	significant
ENSG00000171729	TMEM51	2.48593	9.5244e-06	1.98232	1.1951e-18	significant	phospholipid phosphatase 4
ENSG00000187498	COL4A1	2.48364	2.79026e-11	2.38218	1.46747e-13	significant	signal induced proliferation associated 1 like 3
ENSG00000185442	FAM174B	2.46809	6.41536e-21	1.15545	2.40161e-31	significant	cyclin and CBS domain divalent metal cation transport mediator 4
ENSG00000131459	GFPT2	2.46638	3.41337e-30	2.8273	2.76958e-08	significant
ENSG00000272273	IER3-AS1	2.45816	1.86507e-08	1.30078	0.0171021	significant	uncharacterized LOC107986898
ENSG00000183688	RFLNB	2.45447	1.80378e-27	2.33198	2.12279e-13	significant	potassium channel tetramerization domain containing 11
ENSG00000169908	TM4SF1	2.4542	0.00163923	0.293871	4.82909e-07	not_significant	inhibitory synaptic factor 2A
ENSG00000165434	PGM2L1	2.45382	5.97529e-25	3.18725	0.00441421	significant	uncharacterized LOC101059948
ENSG00000011422	PLAUR	2.45173	1.17697e-24	2.58049	2.14711e-12	significant
ENSG00000100234	TIMP3	2.43999	7.84005e-34	2.66406	0.000126555	significant
ENSG00000105825	TFPI2	2.43743	0.0119343	2.33946	0.000120525	significant	WW and C2 domain containing 1
ENSG00000133794	ARNTL	2.43515	1.24402e-26	2.15484	8.77864e-17	significant	plasminogen activator, urokinase receptor
ENSG00000143067	ZNF697	2.43281	8.04574e-22	2.12867	0.0593868	significant	synapse differentiation inducing 1
ENSG00000170340	B3GNT2	2.43167	5.09885e-37	2.508	2.32856e-08	significant	kinesin family member 21A
ENSG00000246430	LINC00968	2.42809	7.3712e-07	0.52306	9.29402e-11	not_significant	synapsin I
ENSG00000123358	NR4A1	2.41855	0.00113602	1.83061	4.58254e-16	significant	homer scaffold protein 1
ENSG00000185306	C12orf56	2.41596	1.02921e-06	1.45603	1.74738e-20	not_significant	protein phosphatase 1 regulatory subunit 13 like
ENSG00000279191		2.4158	1.51112e-15	2.22858	6.04534e-07	significant	prolyl 4-hydroxylase subunit alpha 3
ENSG00000182379	NXPH4	2.41184	1.1854e-26	2.70648	1.81585e-06	significant	heterogeneous nuclear ribonucleoprotein A1 pseudogene 33
ENSG00000154319	FAM167A	2.41121	0.000192526	2.27642	1.67621e-18	significant	SH3 and multiple ankyrin repeat domains 3
ENSG00000118257	NRP2	2.41011	1.44709e-11	1.70921	5.08136e-07	significant	VPS9D1 antisense RNA 1
ENSG00000237989	LINC01679	2.40653	1.50139e-06	2.34512	8.31766e-09	significant	microtubule associated monooxygenase, calponin and LIM domain containing 2
ENSG00000086730	LAT2	2.39931	3.92202e-06	3.32318	2.40239e-11	significant
ENSG00000100292	HMOX1	2.39528	1.62541e-07	1.05175	8.97587e-28	significant	UDP-GlcNAc:betaGal beta-1,3-N-acetylglucosaminyltransferase 2
ENSG00000148841	ITPRIP	2.39325	3.13307e-22	2.3611	1.07388e-31	significant	transmembrane protein 41B
ENSG00000229647	MYOSLID	2.38599	1.3486e-13	2.38875	3.10053e-43	significant	desmoplakin
ENSG00000133816	MICAL2	2.37499	7.73211e-19	2.52077	0.00497869	significant
ENSG00000171223	JUNB	2.365	8.04731e-11	2.37976	0.027497	significant	serpin family A member 1
ENSG00000154127	UBASH3B	2.36157	1.43403e-14	2.9074	1.73642e-18	significant	chromodomain Y like 2
ENSG00000249378	LINC01060	2.34316	1.10772e-06	1.53829	6.72833e-11	not_significant
ENSG00000141052	MYOCD	2.33664	3.06747e-05	1.18393	3.92845e-22	significant	HIC ZBTB transcriptional repressor 1
ENSG00000171793	CTPS1	2.32987	4.03643e-41	3.15589	1.2729e-29	significant	T-box 3
ENSG00000111863	ADTRP	2.32675	0.000251605	2.69236	0.0520854	significant	opioid binding protein/cell adhesion molecule like
ENSG00000142661	MYOM3	2.32579	6.8484e-28	3.43248	3.84908e-07	significant	leucine rich repeat containing 8 VRAC subunit C
ENSG00000112139	MDGA1	2.32241	2.82846e-50	1.21033	7.26195e-11	significant
ENSG00000162849	KIF26B	2.32082	8.41832e-07	3.52534	6.26119e-13	significant
ENSG00000147234	FRMPD3	2.31385	1.69177e-10	4.09879	0.000262777	significant	leucine rich repeat and fibronectin type III domain containing 5
ENSG00000104881	PPP1R13L	2.31156	1.8952e-32	2.54282	1.57479e-05	significant	BAF chromatin remodeling complex subunit BCL11A
ENSG00000172575	RASGRP1	2.31032	2.12531e-07	3.74436	1.98334e-05	significant	Wnt family member 2
ENSG00000205336	ADGRG1	2.30372	0.000674936	3.44406	2.10535e-06	significant
ENSG00000104368	PLAT	2.29945	6.48715e-09	0.408222	6.40844e-31	not_significant	endoplasmic reticulum to nucleus signaling 1
ENSG00000158321	AUTS2	2.29627	2.22338e-65	2.7468	1.41805e-12	significant	natural killer cell cytotoxicity receptor 3 ligand 1
ENSG00000154928	EPHB1	2.29341	2.00082e-15	3.16171	4.54492e-11	significant	annexin A8
ENSG00000169026	SLC49A3	2.29113	7.19255e-37	2.19496	5.21911e-24	significant	folliculin interacting protein 2
ENSG00000138623	SEMA7A	2.28559	1.63061e-07	3.61834	1.43376e-08	significant	myocardin-induced smooth muscle lncRNA, inducer of differentiation
ENSG00000184995	IFNE	2.28476	6.89458e-11	2.76267	3.16737e-13	significant	LIM domain only 4
ENSG00000099860	GADD45B	2.28395	8.05619e-26	1.8703	1.21355e-06	significant	collagen type IV alpha 1 chain
ENSG00000165891	E2F7	2.28334	2.17352e-05	2.01684	4.73757e-20	significant	JunB proto-oncogene, AP-1 transcription factor subunit
ENSG00000105738	SIPA1L3	2.27955	2.61458e-20	2.62724	2.22894e-05	significant	Rho GTPase activating protein 22
ENSG00000008083	JARID2	2.27803	1.14131e-33	1.86936	1.81892e-19	significant	6-phosphofructo-2-kinase/fructose-2,6-biphosphatase 4
ENSG00000150551	LYPD1	2.2763	0.00115662	3.91806	0.0383616	significant
ENSG00000101665	SMAD7	2.27275	3.19664e-17	2.08469	1.59383e-07	significant	calicin
ENSG00000168811	IL12A	2.25346	6.29513e-06	2.68412	4.38392e-19	significant	inositol 1,4,5-trisphosphate receptor interacting protein
ENSG00000170558	CDH2	2.25099	5.2269e-14	1.71706	8.0081e-39	significant	fibroblast growth factor 2
ENSG00000267257		2.25073	1.31348e-07	1.29808	5.29774e-15	not_significant	ADAM metallopeptidase domain 12
ENSG00000119927	GPAM	2.24658	4.23964e-54	2.27037	2.24454e-08	significant	long intergenic non-protein coding RNA 511
ENSG00000143878	RHOB	2.24441	1.96277e-11	2.30488	1.76365e-13	significant	ectonucleoside triphosphate diphosphohydrolase 7
ENSG00000188522	FAM83G	2.24295	1.97337e-08	2.77838	0.000565077	significant	long intergenic non-protein coding RNA 1679
ENSG00000105088	OLFM2	2.24065	0.00510023	2.07702	3.31523e-08	significant
ENSG00000213859	KCTD11	2.23763	1.3543e-08	2.6049	0.00492572	significant	tissue factor pathway inhibitor 2
ENSG00000178607	ERN1	2.23585	1.342e-32	2.41327	0.00192911	significant	F2R like trypsin receptor 1
ENSG00000179431	FJX1	2.23196	1.92769e-15	2.71444	1.30056e-17	significant	collagen type XXVII alpha 1 chain
ENSG00000084710	EFR3B	2.22837	3.49135e-16	3.47434	7.54909e-19	significant	refilin B
ENSG00000100558	PLEK2	2.2267	1.48506e-16	2.81072	3.81934e-14	significant	cache domain containing 1
ENSG00000183696	UPP1	2.22429	1.85769e-11	1.6435	2.59122e-13	significant	jagged canonical Notch ligand 1
ENSG00000235770	LINC00607	2.21452	2.54612e-10	3.83736	1.73293e-21	significant	teashirt zinc finger homeobox 3
ENSG00000260428	SCX	2.20531	6.23059e-08	1.53389	0.0933243	significant	xin actin binding repeat containing 1
ENSG00000172965	MIR4435-2HG	2.20137	8.27141e-58	2.00146	0.0053017	significant	xanthine dehydrogenase
ENSG00000124813	RUNX2	2.19975	1.08852e-29	1.98056	4.3834e-16	significant
ENSG00000264230	ANXA8L1	2.19628	2.23673e-12	1.42842	1.05944e-10	significant	LHFPL tetraspan subfamily member 2
ENSG00000203805	PLPP4	2.1827	1.29848e-31	2.6352	6.82243e-16	significant	ras homolog family member B
ENSG00000171033	PKIA	2.1821	6.77556e-10	2.13069	2.44987e-09	significant
ENSG00000175727	MLXIP	2.18045	3.50096e-74	2.21388	0.000908225	significant
ENSG00000124766	SOX4	2.17675	1.2427e-11	1.46972	4.55749e-08	significant	adducin 2
ENSG00000104415	CCN4	2.17017	1.15456e-08	2.89482	1.45289e-08	significant	G protein-coupled receptor 75
ENSG00000117036	ETV3	2.16634	6.83969e-08	2.70922	5.78296e-06	significant	family with sequence similarity 167 member A
ENSG00000166292	TMEM100	2.16618	0.000225472	1.16667	4.43063e-50	not_significant	glycerol-3-phosphate acyltransferase, mitochondrial
ENSG00000095303	PTGS1	2.16279	4.03451e-06	1.68899	4.51843e-27	significant	ATP citrate lyase
ENSG00000165379	LRFN5	2.1569	7.83946e-06	2.42387	4.83722e-09	significant	filamin C
ENSG00000135362	PRR5L	2.15565	3.77067e-27	4.13238	1.85613e-08	significant	sphingosine kinase 1
ENSG00000169756	LIMS1	2.15389	5.07965e-35	2.00565	3.84715e-09	significant	ADAM metallopeptidase with thrombospondin type 1 motif 6
ENSG00000271590		2.14619	1.53072e-18	1.94494	5.86403e-12	significant	solute carrier family 35 member F2
ENSG00000135111	TBX3	2.13945	8.00114e-17	2.46877	2.09381e-07	significant
ENSG00000242114	MTFP1	2.12605	3.15493e-07	2.00427	1.10213e-18	significant
ENSG00000113645	WWC1	2.12406	3.54527e-08	2.59025	3.87429e-30	significant	human immunodeficiency virus type I enhancer binding protein 2
ENSG00000143367	TUFT1	2.1201	7.19138e-09	2.66365	0.00114517	significant	G0/G1 switch 2
ENSG00000153976	HS3ST3A1	2.10928	7.77698e-18	2.73817	0.000230957	significant	regulator of G protein signaling 16
ENSG00000017483	SLC38A5	2.10586	5.71282e-11	2.86213	0.000100257	significant	plexin A4
ENSG00000198369	SPRED2	2.10161	6.79138e-28	1.66335	6.97285e-21	significant	MLX interacting protein
ENSG00000169330	MINAR1	2.09882	2.15313e-11	2.02563	6.10077e-20	significant	syndecan 1
ENSG00000126785	RHOJ	2.09416	1.74012e-09	0.936129	8.85391e-16	significant	cyclin dependent kinase inhibitor 2B
ENSG00000127152	BCL11B	2.08276	1.49706e-15	2.83993	1.16548e-39	significant	cytoskeleton regulator RNA
ENSG00000153234	NR4A2	2.07262	0.0238014	1.11923	5.65647e-07	significant	neural precursor cell expressed, developmentally down-regulated 9
ENSG00000261327		2.06972	2.497e-07	2.04114	9.76745e-21	significant	solute carrier family 49 member 3
ENSG00000120158	RCL1	2.06941	1.97257e-27	2.07289	7.36453e-16	significant	alanyl aminopeptidase, membrane
ENSG00000256977	LIMS3	2.06919	8.56321e-08	1.45954	1.58159e-09	significant	human immunodeficiency virus type I enhancer binding protein 3
ENSG00000213030	CGB8	2.0646	1.95612e-05	3.50073	7.06901e-12	significant	DExD-box helicase 21
ENSG00000188916	INSYN2A	2.05767	4.4862e-08	2.60408	1.32695e-09	significant	insulin induced gene 1
ENSG00000260196		2.0561	3.34469e-10	2.59472	4.61654e-05	significant	membrane palmitoylated protein 4
ENSG00000200087	SNORA73B	2.05533	0.00718131	1.54977	3.7399e-27	significant	Kruppel like factor 10
ENSG00000279822		2.04821	2.88531e-05	2.49322	6.69153e-15	significant
ENSG00000139211	AMIGO2	2.04714	0.000176144	1.76094	1.18726e-09	significant	aryl hydrocarbon receptor nuclear translocator like
ENSG00000158859	ADAMTS4	2.03712	1.77975e-26	3.23813	6.95909e-08	significant	CD3e molecule associated protein
ENSG00000136997	MYC	2.03455	4.46023e-15	2.74465	7.76309e-05	significant
ENSG00000249669		2.03434	1.49493e-06	1.48162	3.77875e-28	significant	cell migration inducing hyaluronidase 2
ENSG00000198814	GK	2.03307	5.69977e-06	1.31121	3.60097e-19	significant	leucine rich repeats and immunoglobulin like domains 1
ENSG00000085511	MAP3K4	2.03286	2.74739e-42	1.60222	5.5181e-05	significant	cAMP-dependent protein kinase inhibitor alpha
ENSG00000112414	ADGRG6	2.03199	2.94982e-10	0.922054	7.97471e-25	significant	zinc finger protein 697
ENSG00000198796	ALPK2	2.02818	6.3378e-14	1.29531	2.899e-17	significant	NOP16 nucleolar protein
ENSG00000165732	DDX21	2.02625	5.09126e-29	2.18407	8.78e-16	significant	APC down-regulated 1 like
ENSG00000107957	SH3PXD2A	2.00872	4.77366e-16	1.85901	7.50283e-25	significant	tribbles pseudokinase 1
ENSG00000104783	KCNN4	2.0044	2.90786e-06	3.83977	9.38397e-31	significant	NK3 homeobox 1
ENSG00000111859	NEDD9	1.99328	1.39557e-08	2.19543	2.24636e-07	significant
ENSG00000248690		1.99262	1.56384e-07	2.59393	7.03808e-28	significant	DnaJ heat shock protein family (Hsp40) member B5
ENSG00000151014	NOCT	1.99022	5.88296e-12	1.88739	1.25872e-24	significant	cardiotrophin like cytokine factor 1
ENSG00000123689	G0S2	1.9799	0.0381986	2.22072	4.32319e-15	significant	SMAD family member 7
ENSG00000064393	HIPK2	1.97802	1.70673e-31	1.87629	4.27836e-07	significant	olfactomedin 2
ENSG00000123500	COL10A1	1.97758	0.000125475	2.02893	3.6262e-06	significant
ENSG00000117877	CD3EAP	1.97646	4.51783e-12	2.15245	8.78778e-15	significant	RNA terminal phosphate cyclase like 1
ENSG00000164171	ITGA2	1.97586	0.000130947	2.01203	4.75611e-12	significant	receptor interacting serine/threonine kinase 2
ENSG00000086062	B4GALT1	1.97368	6.46071e-14	2.77666	6.63951e-28	significant	PDZ and LIM domain 4
ENSG00000138835	RGS3	1.97358	2.88146e-26	1.93579	2.10708e-12	significant	spectrin repeat containing nuclear envelope protein 1
ENSG00000048162	NOP16	1.97255	1.55647e-17	2.12652	6.96965e-14	significant	ST3 beta-galactoside alpha-2,3-sialyltransferase 1
ENSG00000137094	DNAJB5	1.96542	1.69207e-18	2.11124	0.000152222	significant	ankyrin repeat domain 1
ENSG00000188064	WNT7B	1.96512	2.30017e-07	3.59467	0.000673637	significant
ENSG00000197594	ENPP1	1.9643	2.8124e-07	4.11596	5.26369e-09	significant	cAMP responsive element binding protein 3 like 2
ENSG00000267493		1.9637	1.58358e-05	1.49853	5.63485e-20	significant	versican
ENSG00000127124	HIVEP3	1.95629	1.01027e-06	2.18538	1.8818e-17	significant	growth factor receptor bound protein 10
ENSG00000083454	P2RX5	1.95024	2.06378e-08	1.51961	0.00603903	significant	neuregulin 1
ENSG00000158158	CNNM4	1.94793	6.44397e-23	2.62063	0.00396443	significant	collagen type X alpha 1 chain
ENSG00000198948	MFAP3L	1.94478	8.36563e-31	1.71922	2.72751e-10	significant	membrane integral NOTCH2 associated receptor 1
ENSG00000152952	PLOD2	1.94418	1.00167e-07	2.76427	3.64083e-14	significant	APCDD1L divergent transcript
ENSG00000163637	PRICKLE2	1.94374	1.45797e-29	1.87265	0.0240319	significant
ENSG00000230630		1.93938	1.12135e-30	2.44543	0.00560539	significant	E2F transcription factor 7
ENSG00000128805	ARHGAP22	1.93315	1.36355e-05	2.37552	1.10248e-46	significant	polypeptide N-acetylgalactosaminyltransferase 10
ENSG00000128590	DNAJB9	1.93188	2.15027e-11	1.68497	3.31964e-17	significant	importin 7
ENSG00000121297	TSHZ3	1.92796	5.01275e-12	2.31754	1.55418e-08	significant	sushi repeat containing protein X-linked 2
ENSG00000007237	GAS7	1.92068	1.59853e-23	1.55261	0.000209356	significant	integrin subunit alpha 2
ENSG00000172331	BPGM	1.91918	4.64577e-33	1.98556	2.11405e-06	significant
ENSG00000198959	TGM2	1.91662	1.57802e-06	1.65416	5.39642e-27	significant	LIM zinc finger domain containing 1
ENSG00000268655	LOC101059948	1.91281	1.03856e-05	2.59942	5.22008e-09	significant	mitochondrial fission process 1
ENSG00000173926	MARCH3	1.9097	0.000447753	2.90034	2.85019e-08	significant	SET binding protein 1
ENSG00000157168	NRG1	1.90928	8.07947e-06	2.03523	2.35229e-55	significant	MIR4435-2 host gene
ENSG00000105810	CDK6	1.90085	1.17235e-29	1.98136	6.98919e-17	significant	yrdC N6-threonylcarbamoyltransferase domain containing
ENSG00000251615		1.89698	0.00012468	2.34186	1.31996e-36	significant	bisphosphoglycerate mutase
ENSG00000196739	COL27A1	1.89594	2.38847e-17	2.33378	6.79093e-06	significant	cysteine rich secretory protein LCCL domain containing 2
ENSG00000274630		1.8881	0.00217046	1.84984	5.84813e-06	significant	transmembrane protein 51
ENSG00000131435	PDLIM4	1.88612	9.62749e-18	2.07064	1.16987e-15	significant	cyclin dependent kinase 6
ENSG00000155090	KLF10	1.88401	4.33048e-12	2.17522	1.44155e-20	significant	RUNX family transcription factor 2
ENSG00000196449	YRDC	1.87802	1.02732e-18	1.99141	4.97226e-39	significant	Rho guanine nucleotide exchange factor 40
ENSG00000132003	ZSWIM4	1.87634	5.14991e-11	1.30733	4.97659e-26	significant	HDGF like 3
ENSG00000227992		1.87229	8.82911e-06	2.63661	0.001121	significant	long intergenic non-protein coding RNA 1711
ENSG00000148677	ANKRD1	1.87137	2.12079e-06	2.04747	1.68463e-07	significant	aquaporin 1 (Colton blood group)
ENSG00000103196	CRISPLD2	1.87103	8.50668e-05	1.98257	5.95898e-07	significant	zinc finger protein 331
ENSG00000128591	FLNC	1.86677	9.90651e-08	2.24953	0.000114898	significant
ENSG00000198042	MAK16	1.85944	2.09434e-31	1.73022	2.40797e-18	significant	dual specificity phosphatase 5
ENSG00000183578	TNFAIP8L3	1.85659	2.95793e-11	1.03381	0.0361207	significant	paired box 8
ENSG00000196337	CGB7	1.8552	3.22353e-08	2.85656	3.86558e-38	significant	jade family PHD finger 3
ENSG00000273730		1.85426	1.11741e-05	1.15101	2.44207e-17	not_significant	SH3 binding domain protein 5 like
ENSG00000274917		1.85426	1.11741e-05	1.15101	0.00794606	not_significant	TEK receptor tyrosine kinase
ENSG00000275215	RNA5-8SN3	1.85426	1.11741e-05	1.15101	3.1057e-08	not_significant
ENSG00000275757		1.85426	1.11741e-05	1.15101	3.50665e-08	not_significant	solute carrier family 2 member 1
ENSG00000276700		1.85426	1.11741e-05	1.15101	1.21796e-08	not_significant	intermediate filament family orphan 2
ENSG00000277739		1.85426	1.11741e-05	1.15101	2.14999e-20	not_significant	regulator of G protein signaling 3
ENSG00000278189	RNA5-8SN1	1.85426	1.11741e-05	1.15101	7.83544e-21	not_significant	RAS like proto-oncogene B
ENSG00000278233	RNA5-8SN2	1.85426	1.11741e-05	1.15101	5.92862e-17	not_significant	formin like 3
ENSG00000135048	CEMIP2	1.85264	1.31517e-09	2.13942	8.29569e-27	significant	RUNX family transcription factor 1
ENSG00000173846	PLK3	1.85089	5.32932e-09	1.75981	1.22428e-19	significant	membrane bound O-acyltransferase domain containing 2
ENSG00000255176		1.84899	4.33229e-05	2.16899	2.12031e-15	significant	tropomyosin 1
ENSG00000162975	KCNF1	1.84649	1.44248e-08	0.678645	2.12969e-13	not_significant	forkhead box O3
ENSG00000163735	CXCL5	1.84645	0.046616	1.45281	0.000992859	significant
ENSG00000255112	CHMP1B	1.84583	2.38065e-06	1.63941	3.60719e-05	significant	programmed cell death 1 ligand 2
ENSG00000177169	ULK1	1.836	1.19372e-09	1.36043	8.56682e-21	significant	paired like homeodomain 2
ENSG00000188211	NCR3LG1	1.83334	1.45237e-11	2.40623	1.15154e-06	significant	insulin receptor substrate 2
ENSG00000173451	THAP2	1.83209	3.77667e-12	2.77277	0.000197347	significant	formin homology 2 domain containing 3
ENSG00000052795	FNIP2	1.82945	1.24659e-39	2.40191	1.70468e-08	significant	nuclear receptor interacting protein 3
ENSG00000176170	SPHK1	1.82926	4.93444e-08	2.24774	3.84748e-08	significant	dedicator of cytokinesis 3
ENSG00000120875	DUSP4	1.82846	0.000791957	2.93206	1.21586e-19	significant	four and a half LIM domains 3
ENSG00000253669		1.82791	6.48178e-06	2.30539	1.49583e-11	significant	docking protein 3
ENSG00000088538	DOCK3	1.8214	1.03303e-09	1.90022	6.51733e-24	significant	nocturnin
ENSG00000116701	NCF2	1.80841	0.00126761	3.55351	1.7672e-14	significant	ring finger protein 126
ENSG00000171889		1.80659	1.65168e-08	2.1132	2.33581e-10	significant	solute carrier family 17 member 9
ENSG00000110660	SLC35F2	1.80454	1.87788e-14	2.24201	6.49853e-17	significant	SH2 domain containing adaptor protein B
ENSG00000131473	ACLY	1.80366	2.67503e-27	2.25673	3.99901e-08	significant	spermine oxidase
ENSG00000271857		1.80006	0.00138028	2.07385	0.000640588	significant	spindle apparatus coiled-coil protein 1
ENSG00000094975	SUCO	1.7998	5.18023e-33	1.83658	1.06589e-12	significant	homeodomain interacting protein kinase 2
ENSG00000258967		1.79206	0.00820859	1.75824	8.34931e-09	significant	glucosamine-phosphate N-acetyltransferase 1
ENSG00000118515	SGK1	1.79128	6.81328e-20	1.09105	2.27397e-30	significant	prickle planar cell polarity protein 2
ENSG00000070423	RNF126	1.7908	7.90821e-20	1.88659	5.29095e-14	significant	growth arrest and DNA damage inducible beta
ENSG00000261373	VPS9D1-AS1	1.78979	2.62577e-07	2.52411	6.31642e-08	significant	jumonji and AT-rich interaction domain containing 2
ENSG00000112033	PPARD	1.78851	1.37714e-29	1.42388	5.18099e-18	significant	spalt like transcription factor 1
ENSG00000113742	CPEB4	1.78568	8.38168e-20	1.46849	0.000166549	significant	endothelin receptor type A
ENSG00000100522	GNPNAT1	1.78517	1.63459e-65	1.87279	0.00383102	significant	chromodomain helicase DNA binding protein 7
ENSG00000224126		1.7844	0.00627252	1.32861	7.93013e-12	not_significant	Kruppel like factor 7
ENSG00000077684	JADE1	1.78399	2.22409e-20	1.8081	2.60931e-10	significant	SH3 and PX domains 2A
ENSG00000130720	FIBCD1	1.7763	1.52098e-18	4.75572	0.000788191	significant
ENSG00000187605	TET3	1.77118	1.66923e-09	0.6696	9.70479e-14	significant	adhesion G protein-coupled receptor L4
ENSG00000247626	MARS2	1.77005	2.34486e-17	1.7234	3.90497e-21	significant	SUN domain containing ossification factor
ENSG00000049192	ADAMTS6	1.76849	2.65742e-07	2.24566	1.95322e-09	significant	pseudouridine synthase 1
ENSG00000166471	TMEM41B	1.76631	2.47183e-09	2.5067	0.000162081	significant	INSC spindle orientation adaptor protein
ENSG00000270067		1.76546	6.23279e-06	1.01874	0.000179806	not_significant	nuclear receptor subfamily 4 group A member 1
ENSG00000118689	FOXO3	1.76525	6.23576e-20	1.90751	1.38867e-28	significant	tensin 1
ENSG00000221866	PLXNA4	1.76406	8.2833e-13	2.21666	2.88159e-14	significant	HECT domain E3 ubiquitin protein ligase 2
ENSG00000078401	EDN1	1.75841	8.71267e-06	4.00978	0.2026	significant
ENSG00000095637	SORBS1	1.75298	0.0148936	0.713162	1.51202e-07	not_significant	ATPase family AAA domain containing 3B
ENSG00000151617	EDNRA	1.75285	1.84179e-10	1.86593	9.17893e-07	significant	ADP ribosylation factor like GTPase 4A
ENSG00000052749	RRP12	1.75216	1.82155e-25	1.81609	6.53905e-06	significant	HIF1A antisense RNA 1
ENSG00000163697	APBB2	1.75136	6.57746e-35	1.57092	3.58584e-15	significant	ATPase H+ transporting V0 subunit a2
ENSG00000073008	PVR	1.74876	4.17917e-33	1.43229	5.08972e-15	significant	ribosomal RNA processing 12 homolog
ENSG00000147509	RGS20	1.74679	1.88478e-06	1.62829	5.03202e-11	significant	YOD1 deubiquitinase
ENSG00000138166	DUSP5	1.74669	1.71917e-07	1.95518	4.25829e-11	significant	jade family PHD finger 1
ENSG00000231290	APCDD1L-DT	1.74382	1.09844e-17	2.02348	5.1851e-24	significant	dual specificity phosphatase 10
ENSG00000251322	SHANK3	1.74273	1.7499e-35	2.52985	8.85391e-16	significant	solute carrier family 16 member 1
ENSG00000102359	SRPX2	1.74173	6.6786e-11	2.01256	2.00838e-12	significant	ubiquitin specific peptidase 31
ENSG00000166922	SCG5	1.74159	1.1676e-10	0.697903	1.59059e-07	not_significant
ENSG00000130844	ZNF331	1.73931	3.61438e-08	1.95937	2.04885e-20	significant	acyl-CoA synthetase long chain family member 4
ENSG00000175505	CLCF1	1.73826	2.40683e-07	2.10922	7.03808e-28	significant	pleckstrin homology like domain family B member 1
ENSG00000241945	PWP2	1.73655	0.00032449	1.71186	8.78143e-05	significant	platelet derived growth factor C
ENSG00000131634	TMEM204	1.73593	1.92396e-17	1.46103	7.68783e-08	significant	solute carrier family 29 member 1 (Augustine blood group)
ENSG00000183496	MEX3B	1.73173	0.0221641	3.18041	5.90517e-08	significant	phosphorylase kinase regulatory subunit alpha 1
ENSG00000134986	NREP	1.71763	1.59594e-23	1.65319	0.101268	significant	mitotically associated long non coding RNA
ENSG00000103647	CORO2B	1.71404	1.81629e-10	1.58568	1.07973e-13	significant	GTP binding protein 4
ENSG00000082126	MPP4	1.71378	2.5106e-06	2.17537	0.00103418	significant	solute carrier family 7 member 5
ENSG00000153046	CDYL	1.7095	4.64305e-29	1.31478		significant	RNA, variant U1 small nuclear 18
ENSG00000136052	SLC41A2	1.70867	1.36063e-08	1.5084	3.03007e-09	significant	adhesion molecule with Ig like domain 2
ENSG00000258186		1.70372	0.0474668	-0.0090247	1.23482e-14	not_significant	polo like kinase 3
ENSG00000149380	P4HA3	1.70252	0.000776094	2.54157	0.00684343	significant
ENSG00000227036	LINC00511	1.6866	0.000375797	2.35249	0.000595649	significant	KIAA1549 like
ENSG00000143013	LMO4	1.68473	5.19418e-15	2.38323	3.43739e-08	significant	Wnt family member 5B
ENSG00000068366	ACSL4	1.68196	6.19248e-32	1.79146	1.94312e-09	significant	family with sequence similarity 57 member A
ENSG00000113296	THBS4	1.66894	0.0104229	0.315371	1.31464e-28	not_significant	biogenesis of lysosomal organelles complex 1 subunit 2
ENSG00000143797	MBOAT2	1.6688	4.22225e-108	1.91016	0.00436601	significant	glutamate receptor interacting protein 2
ENSG00000165801	ARHGEF40	1.66676	3.03915e-51	1.97895	3.57896e-14	significant	transmembrane protein with EGF like and two follistatin like domains 1
ENSG00000138685	FGF2	1.66568	2.26872e-17	2.3586	8.41718e-05	significant	dedicator of cytokinesis 10
ENSG00000119681	LTBP2	1.66117	3.13968e-15	1.50817	0.0271764	significant
ENSG00000198768	APCDD1L	1.66079	9.15375e-19	2.12274	1.96667e-14	significant	MAK16 homolog
ENSG00000122644	ARL4A	1.66001	2.30844e-19	1.82438	2.24497e-17	significant	zinc finger protein 672
ENSG00000148848	ADAM12	1.65802	1.75915e-17	2.35542	1.99119e-15	significant	zinc finger protein 175
ENSG00000142207	URB1	1.65689	3.19202e-18	1.63087	4.74203e-07	significant	methionyl-tRNA synthetase 2, mitochondrial
ENSG00000145220	LYAR	1.65381	8.03878e-13	1.61539	1.04068e-09	significant	microfibril associated protein 3 like
ENSG00000171161	ZNF672	1.6487	1.22524e-29	1.72696	1.90527e-05	significant	FERM domain containing 4A
ENSG00000143507	DUSP10	1.64548	6.17233e-12	1.80706	5.38552e-05	significant	cadherin 2
ENSG00000145990	GFOD1	1.64508	8.04433e-09	1.71374	8.78262e-11	significant
ENSG00000010310	GIPR	1.6409	0.000471802	-0.704554	0.00230908	not_significant	glucose-fructose oxidoreductase domain containing 1
ENSG00000161791	FMNL3	1.63604	1.61163e-33	1.92764	5.48559e-12	significant	PWP2 small subunit processome component
ENSG00000135763	URB2	1.63441	4.20682e-21	1.58437	1.41452e-09	significant	arylsulfatase family member I
ENSG00000151474	FRMD4A	1.6323	1.85146e-12	1.71715	3.90102e-11	significant	smoothelin
ENSG00000177425	PAWR	1.63148	1.21998e-09	1.67191	2.0683e-05	significant	neuropilin 2
ENSG00000155438	NIFK	1.62861	2.83557e-22	1.65075	3.30947e-12	significant	WD repeat domain 43
ENSG00000079308	TNS1	1.6283	1.68812e-24	1.82971	1.13985e-18	significant	musculin
ENSG00000241697	TMEFF1	1.6274	1.80678e-07	1.74059	4.52327e-16	significant	myosin IXB
ENSG00000006459	KDM7A	1.62205	7.95932e-06	1.42181	7.88033e-23	significant	MOB kinase activator 1B
ENSG00000114268	PFKFB4	1.60952	4.88595e-14	2.3754	1.7032e-09	significant	ankyrin repeat domain 44
ENSG00000040275	SPDL1	1.60698	1.67135e-32	1.87644	0.000115927	significant	histidine rich carboxyl terminus 1
ENSG00000232956	SNHG15	1.60651	1.81186e-13	1.63721	1.46875e-10	significant	serine/threonine kinase 38 like
ENSG00000107937	GTPBP4	1.60372	1.96018e-27	1.76641	0.00327383	significant	leucine rich repeat containing 15
ENSG00000133657	ATP13A3	1.60325	2.38701e-14	0.953159	4.77582e-09	significant	sprouty RTK signaling antagonist 4
ENSG00000070495	JMJD6	1.59921	9.21219e-14	1.63353	2.97186e-08	significant	ArfGAP with SH3 domain, ankyrin repeat and PH domain 2
ENSG00000160072	ATAD3B	1.59791	3.93048e-26	1.82705	0.224646	significant	keratinocyte proline rich protein
ENSG00000128059	PPAT	1.59689	2.67724e-12	1.49339	1.25559e-07	significant	prostaglandin-endoperoxide synthase 1
ENSG00000128656	CHN1	1.59659	1.50898e-15	0.51313	8.50032e-08	not_significant	DnaJ heat shock protein family (Hsp40) member B9
ENSG00000131018	SYNE1	1.59509	4.25186e-21	2.06649	0.000186069	significant	pleckstrin homology like domain family A member 2
ENSG00000175137	SH3BP5L	1.59226	1.07179e-17	1.94666	3.10363e-13	significant	eukaryotic translation initiation factor 3 subunit J
ENSG00000059758	CDK17	1.5898	6.60263e-39	1.44436	3.03427e-08	significant	selenoprotein I
ENSG00000134775	FHOD3	1.58918	0.000328156	1.90133	9.14877e-17	significant	thymine DNA glycosylase
ENSG00000139372	TDG	1.58865	2.59791e-23	1.6777	1.52171e-19	significant	solute carrier family 4 member 7
ENSG00000203761		1.58544	0.000607779	0.851592	8.95708e-07	not_significant	pro-apoptotic WT1 regulator
ENSG00000103404	USP31	1.58495	4.72461e-13	1.79801	1.03352e-08	significant	ras related dexamethasone induced 1
ENSG00000105497	ZNF175	1.5843	2.86551e-22	1.7254	1.93205e-07	significant	ring finger protein 152
ENSG00000157557	ETS2	1.58412	3.19178e-08	1.28323	4.89745e-12	significant	sprouty related EVH1 domain containing 2
ENSG00000054965	FAM168A	1.58101	7.04684e-60	1.41369	7.23112e-06	significant	coiled-coil domain containing 86
ENSG00000135905	DOCK10	1.58066	2.60461e-05	1.73833	6.96756e-10	significant	NOP2 nucleolar protein
ENSG00000233225		1.57839	0.000452368	0.936823	3.94088e-14	significant	pellino E3 ubiquitin protein ligase 1
ENSG00000015568	RGPD5	1.57483	0.0170703	0.825958	1.92753e-07	significant	transglutaminase 2
ENSG00000164933	SLC25A32	1.57378	2.40246e-32	1.5837	6.95513e-08	significant	dyskerin pseudouridine synthase 1
ENSG00000196843	ARID5A	1.57168	6.7718e-14	1.10204	8.92625e-07	significant	neuronal regeneration related protein
ENSG00000273350		1.5713	0.0178048	2.7393	4.15179e-15	significant	proteasome activator subunit 4
ENSG00000053372	MRTO4	1.56801	3.21554e-19	1.50311	3.69047e-12	significant	nucleolar protein interacting with the FHA domain of MKI67
ENSG00000196072	BLOC1S2	1.56247	1.96585e-23	1.74515	7.08218e-10	significant	uridine phosphorylase 1
ENSG00000104131	EIF3J	1.56195	2.31487e-20	1.68403	8.83559e-22	significant	solute carrier family 16 member 2
ENSG00000167695	FAM57A	1.56146	2.45703e-13	1.75366	9.0239e-15	significant	DENN domain containing 2C
ENSG00000157654	PALM2-AKAP2	1.56017	1.97182e-06	1.03931	3.77486e-07	significant	testin LIM domain protein
ENSG00000128228	SDF2L1	1.55809	4.01178e-11	1.44222	1.70145e-19	significant	chromosome 18 open reading frame 25
ENSG00000147100	SLC16A2	1.55643	9.75276e-24	1.64201	4.42045e-06	significant	charged multivesicular body protein 1B
ENSG00000139146	SINHCAF	1.55246	5.5627e-15	1.54337	2.5171e-07	significant	small nucleolar RNA host gene 15
ENSG00000183963	SMTN	1.54919	5.11664e-19	1.70942	3.73116e-23	significant	jumonji domain containing 6, arginine demethylase and lysine hydroxylase
ENSG00000144118	RALB	1.5487	2.16411e-33	1.93397		significant
ENSG00000114251	WNT5A	1.54847	3.47284e-10	1.5711	8.28053e-23	significant	acyl-CoA oxidase 3, pristanoyl
ENSG00000224080		1.54706	0.000130878	1.60077	2.53841e-13	significant	URB1 ribosome biogenesis homolog
ENSG00000239948		1.54426	0.0140866	3.56779	2.74337e-05	significant	gamma-aminobutyric acid type B receptor subunit 2
ENSG00000274818		1.54232	0.0305785	1.17284	0.0207448	not_significant	regulator of G protein signaling 20
ENSG00000088826	SMOX	1.5406	4.59401e-05	1.88133	4.87224e-09	significant	protein tyrosine phosphatase 4A1
ENSG00000211455	STK38L	1.54058	0.00212845	1.69964	1.41924e-09	significant	kinase suppressor of ras 1
ENSG00000148459	PDSS1	1.53731	2.03247e-09	1.45277	2.14832e-11	significant	bystin like
ENSG00000103449	SALL1	1.53598	3.35657e-52	1.86738	2.75754e-19	significant	phosphoglucomutase 3
ENSG00000010818	HIVEP2	1.53474	1.41733e-17	2.2271	3.98605e-06	significant	glutamate ionotropic receptor AMPA type subunit 3
ENSG00000134871	COL4A2	1.53382	8.70395e-08	1.43657	0.0009295	significant	TSC22 domain family member 3
ENSG00000132603	NIP7	1.53348	1.7597e-18	1.51565	3.16155e-06	significant	Ly1 antibody reactive
ENSG00000221955	SLC12A8	1.53343	7.0806e-06	-0.738326	9.29402e-11	not_significant	zinc finger protein 583
ENSG00000115946	PNO1	1.53176	5.87936e-22	1.54055	0.000770639	significant	SMAD specific E3 ubiquitin protein ligase 2
ENSG00000099810	MTAP	1.53049	1.25995e-27	1.44273	3.9743e-08	significant	TNF receptor superfamily member 12A
ENSG00000096696	DSP	1.52932	8.51037e-14	2.49486	3.72834e-09	significant	core-binding factor subunit beta
ENSG00000130826	DKC1	1.52158	1.29516e-25	1.65324	4.66876e-21	significant	UDP-glucose 6-dehydrogenase
ENSG00000234231		1.52147	1.18846e-23	1.71422	4.47998e-19	significant	fucosyltransferase 4
ENSG00000185947	ZNF267	1.51935	1.57667e-07	1.063	3.23757e-12	significant	StAR related lipid transfer domain containing 13
ENSG00000196371	FUT4	1.51781	3.95809e-16	1.60443	9.12448e-15	significant	mitogen-activated protein kinase kinase kinase 4
ENSG00000130204	TOMM40	1.51725	6.63169e-16	1.51262	0.000186528	significant
ENSG00000080608	PUM3	1.51564	4.19689e-24	1.58698	3.58415e-11	significant	transforming growth factor beta induced
ENSG00000163811	WDR43	1.51472	6.48844e-23	1.70793	0.0083871	significant
ENSG00000244165	P2RY11	1.51103	4.6043e-11	1.55535	6.27666e-13	significant	pumilio RNA binding family member 3
ENSG00000106683	LIMK1	1.50582	2.32934e-15	1.44493	0.00764119	significant
ENSG00000223612		1.50581	0.0437064	1.10206	9.18966e-05	not_significant	coronin 2B
ENSG00000273398		1.50225	0.000108582	0.65109	3.03025e-05	not_significant	URB2 ribosome biogenesis homolog
ENSG00000125618	PAX8	1.502	0.00091675	1.95221	5.22926e-16	significant	solute carrier family 25 member 32
ENSG00000140332	TLE3	1.50153	2.46421e-14	1.44366	0.000252809	significant	RAB3A interacting protein
ENSG00000272669		1.5015	0.00784196	0.622869	3.23244e-16	not_significant	moesin
ENSG00000177192	PUS1	1.50108	1.06057e-10	1.83431	9.8275e-16	significant	SERTA domain containing 1
ENSG00000166446	CDYL2	1.50032	7.07629e-33	2.48146	1.41213e-18	significant	Wnt family member 5A
ENSG00000119771	KLHL29	1.49415	3.10433e-10	1.46317	5.6469e-19	significant	amyloid beta precursor protein binding family B member 2
ENSG00000159216	RUNX1	1.49294	4.4331e-09	1.91834	4.32319e-15	significant	twinkle mtDNA helicase
ENSG00000110104	CCDC86	1.49214	2.24347e-08	1.66039	1.28463e-09	significant	purinergic receptor P2Y11
ENSG00000118263	KLF7	1.48891	3.04678e-09	1.86321	1.25767e-09	significant	c-Maf inducing protein
ENSG00000160193	WDR4	1.48858	1.00629e-11	1.53318	7.73278e-05	significant	eva-1 homolog A, regulator of programmed cell death
ENSG00000183386	FHL3	1.48824	2.933e-06	1.89588	0.00162625	significant	growth arrest specific 7
ENSG00000271020		1.48818	0.0028897	1.35903	0.047784	significant	small nucleolar RNA, H/ACA box 73B
ENSG00000163110	PDLIM5	1.48503	2.64034e-12	1.10345	2.73575e-15	significant	major facilitator superfamily domain containing 12
ENSG00000184292	TACSTD2	1.48337	0.0109136	2.84718	1.09535e-06	significant	BOP1 ribosomal biogenesis factor
ENSG00000174945	AMZ1	1.4821	0.00214958	1.12266	7.15145e-14	not_significant	integrin subunit alpha 5
ENSG00000006016	CRLF1	1.48183	1.83202e-18	0.755179	1.05238e-05	not_significant	NOP56 ribonucleoprotein
ENSG00000152894	PTPRK	1.48143	3.47096e-39	1.31721	0.000606816	significant	SIN3-HDAC complex associated factor
ENSG00000196756	SNHG17	1.48098	5.56943e-19	1.19825	3.64067e-07	significant	G protein-coupled receptor 157
ENSG00000112578	BYSL	1.4764	4.13581e-24	1.62453	6.07815e-12	significant	partner of NOB1 homolog
ENSG00000267436		1.47179	0.00877903	1.47961	0.183806	significant	long intergenic non-protein coding RNA 1060
ENSG00000273568		1.47174	0.016367	1.95657	0.0507732	significant
ENSG00000279095		1.46973	2.94799e-11	1.21234	6.59685e-06	significant	StAR related lipid transfer domain containing 4
ENSG00000075340	ADD2	1.46932	6.32585e-05	2.28235	0.00301616	significant	scleraxis bHLH transcription factor
ENSG00000271643		1.46825	2.62475e-07	1.79672	0.000125193	significant	WD repeat domain 4
ENSG00000033867	SLC4A7	1.46712	3.05734e-17	1.67252	0.00349264	significant
ENSG00000080493	SLC4A4	1.46241	2.35734e-07	1.42029	4.74809e-09	significant	semaphorin 3C
ENSG00000175352	NRIP3	1.45973	4.20717e-10	1.90059	4.45927e-12	significant	ZPR1 zinc finger
ENSG00000067955	CBFB	1.45822	1.07428e-09	1.61044	0.0464687	significant	purinergic receptor P2X 5
ENSG00000198440	ZNF583	1.45695	2.50225e-10	1.61465	5.41797e-08	significant	potassium voltage-gated channel subfamily C member 4
ENSG00000107815	TWNK	1.45221	1.69792e-19	1.55951	8.15516e-08	significant	nucleolar pre-rRNA processing protein NIP7
ENSG00000261236	BOP1	1.45036	1.74177e-14	1.54562	1.44629e-12	significant	GrpE like 1, mitochondrial
ENSG00000248587		1.44868	3.7794e-06	2.41606	1.41025e-10	significant	peter pan homolog
ENSG00000135269	TES	1.44821	7.79547e-08	1.64027	1.27755e-05	significant	translocase of outer mitochondrial membrane 40
ENSG00000102452	NALCN	1.44686	1.72785e-10	0.535814	0.00152612	not_significant	oxysterol binding protein like 6
ENSG00000101361	NOP56	1.44204	2.16508e-15	1.54388	1.70811e-17	significant	cyclin dependent kinase 14
ENSG00000275464	LOC102724159	1.44125	9.15594e-14	1.2263	1.21829e-11	significant	solute carrier family 41 member 2
ENSG00000186480	INSIG1	1.44122	0.0281518	2.18162	2.22353e-10	significant	latent transforming growth factor beta binding protein 2
ENSG00000154217	PITPNC1	1.43926	0.000111909	1.13639	2.33579e-05	significant	UDP-N-acetylglucosamine pyrophosphorylase 1
ENSG00000152217	SETBP1	1.4315	2.86232e-09	2.00291	2.87463e-06	significant	MRT4 homolog, ribosome maturation factor
ENSG00000065911	MTHFD2	1.4293	0.00066856	0.692921	1.23842e-25	not_significant	transmembrane protein 173
ENSG00000176887	SOX11	1.42701	2.66122e-07	0.344041	0.00229105	not_significant
ENSG00000164309	CMYA5	1.42618	1.01793e-06	-0.878693	1.96819e-07	significant	protocadherin gamma subfamily C, 5
ENSG00000198018	ENTPD7	1.42086	2.07028e-13	2.34743	2.54318e-13	significant	kirre like nephrin family adhesion molecule 1
ENSG00000136928	GABBR2	1.41868	0.000127696	1.62893	0.000524863	significant	phosphoribosyl pyrophosphate amidotransferase
ENSG00000234380	LINC01426	1.41727	0.000231312	1.06749	5.87095e-05	not_significant	formin homology 2 domain containing 1
ENSG00000166592	RRAD	1.41708	0.00623349	0.256621	2.45604e-07	not_significant	zinc finger protein 121
ENSG00000205339	IPO7	1.41451	2.25095e-29	2.01404	2.13129e-06	significant	LysM domain containing 2
ENSG00000112245	PTP4A1	1.41345	6.2787e-12	1.62674	3.52412e-11	significant	MIR22 host gene
ENSG00000181649	PHLDA2	1.41261	7.35043e-07	1.68475	5.49141e-23	significant	retinitis pigmentosa GTPase regulator
ENSG00000006327	TNFRSF12A	1.41016	5.38672e-11	1.61098	5.55942e-05	significant
ENSG00000120156	TEK	1.40774	0.00174904	1.94522	0.000745291	significant	centromere protein N
ENSG00000182158	CREB3L2	1.40457	1.51869e-15	2.04029	3.7352e-06	significant	tubulin beta 3 class III
ENSG00000160460	SPTBN4	1.40303	2.31735e-05	0.87451	0.00403745	not_significant
ENSG00000019144	PHLDB1	1.40218	3.42408e-17	1.78671	1.98893e-09	significant	DEAH-box helicase 37
ENSG00000228649		1.40136	3.55376e-09	1.1024	0.00555169	significant
ENSG00000123496	IL13RA2	1.39996	0.0169262	0.803427	3.34715e-15	not_significant	RIO kinase 1
ENSG00000012061	ERCC1	1.39937	1.28242e-24	1.07943	5.20049e-17	significant	tyrosine 3-monooxygenase/tryptophan 5-monooxygenase activation protein gamma
ENSG00000108179	PPIF	1.39589	1.66188e-08	0.957282	0.00238835	significant	SRY-box 4
ENSG00000137193	PIM1	1.39547	0.00171621	0.521733	1.0194e-33	not_significant	cytoplasmic polyadenylation element binding protein 4
ENSG00000197498	RPF2	1.39394	3.49343e-17	1.35946	2.18702e-08	significant	kelch like family member 26
ENSG00000143751	SDE2	1.38865	1.56103e-21	1.41224	1.48536e-14	significant	solute carrier family 39 member 14
ENSG00000111641	NOP2	1.38781	2.81887e-13	1.65567	0.00402103	significant	somatostatin receptor 1
ENSG00000099331	MYO9B	1.38703	3.38649e-29	1.70339	1.55117e-13	significant	leucine rich repeat containing 8 VRAC subunit A
ENSG00000155380	SLC16A1	1.38609	1.77645e-23	1.80469	6.33945e-10	significant	kinesin family member C3
ENSG00000138018	SELENOI	1.38542	4.19347e-41	1.67808	8.49196e-06	significant	kelch like family member 29
ENSG00000169991	IFFO2	1.3798	0.00026273	1.9359	1.32326e-19	significant	La ribonucleoprotein domain family member 6
ENSG00000115875	SRSF7	1.37973	2.5002e-17	1.12726	5.99221e-09	significant	proteasome 26S subunit, non-ATPase 2
ENSG00000233621	LINC01137	1.3777	1.31213e-05	0.387491	2.55516e-13	not_significant	transmembrane protein 204
ENSG00000126953	TIMM8A	1.37721	1.00304e-10	1.25781	5.13815e-09	significant	RAS p21 protein activator 2
ENSG00000120694	HSPH1	1.377	3.63955e-11	1.19127	0.0231043	significant	LIM zinc finger domain containing 3
ENSG00000108854	SMURF2	1.37566	5.08016e-05	1.61237	2.84735e-12	significant	MYB binding protein 1a
ENSG00000164300	SERINC5	1.37393	2.95138e-11	1.21513	1.61227e-09	significant	ATPase H+ transporting V0 subunit b
ENSG00000145685	LHFPL2	1.37379	0.00261055	2.30522	0.0858785	significant	chromosome 12 open reading frame 56
ENSG00000115598	IL1RL2	1.37353	0.000908542	0.967012	0.00156749	not_significant	neuronal PAS domain protein 2
ENSG00000169902	TPST1	1.37159	6.65275e-09	1.3534	1.52225e-08	significant	nucleolar and coiled-body phosphoprotein 1
ENSG00000172738	TMEM217	1.37157	0.00114437	1.16675	0.0392193	significant	C-X-C motif chemokine ligand 5
ENSG00000140416	TPM1	1.37077	4.9624e-11	1.90859	0.00135722	significant	decaprenyl diphosphate synthase subunit 1
ENSG00000148516	ZEB1	1.37008	1.45769e-37	0.704239	1.3584e-09	significant	ABL proto-oncogene 2, non-receptor tyrosine kinase
ENSG00000166197	NOLC1	1.36928	2.76986e-20	1.45348	2.05832e-21	significant	notch receptor 2
ENSG00000279227		1.36901	0.000169665	2.23296	8.53295e-10	significant	protein tyrosine phosphatase receptor type F
ENSG00000081320	STK17B	1.36857	6.1633e-14	0.891334	4.60607e-09	significant	programmed cell death 11
ENSG00000127328	RAB3IP	1.36849	2.13716e-05	1.58237	5.97262e-12	significant	LIM domain kinase 1
ENSG00000197961	ZNF121	1.36574	2.33682e-15	1.48783	1.43166e-14	significant	ubiquitin like modifier activating enzyme 6
ENSG00000132661	NXT1	1.36172	1.23464e-13	1.12764	8.93794e-11	significant	cyclin dependent kinase 17
ENSG00000151693	ASAP2	1.36093	6.63289e-11	1.69182	1.42777e-08	significant	PX domain containing 1
ENSG00000044574	HSPA5	1.36029	5.33154e-11	1.40799	1.77861e-09	significant	TLE family member 3, transcriptional corepressor
ENSG00000125551	PLGLB2	1.3599	1.42373e-05	0.530473	0.000656564	not_significant	deoxycytidine kinase
ENSG00000065413	ANKRD44	1.35954	1.67539e-06	1.70099	1.75198e-09	significant	GLI family zinc finger 2
ENSG00000102531	FNDC3A	1.35926	2.1057e-10	1.1061	3.92006e-09	significant	methylthioadenosine phosphorylase
ENSG00000153815	CMIP	1.35729	4.13734e-16	1.55472	2.79692e-05	significant	stromal cell derived factor 2 like 1
ENSG00000136261	BZW2	1.35694	2.98235e-17	1.4184	0.00324713	significant
ENSG00000143256	PFDN2	1.35474	3.11126e-23	1.3258	0.000220561	significant	collagen type IV alpha 2 chain
ENSG00000197461	PDGFA	1.35352	0.0269005	2.68499	2.91214e-09	significant	meteorin like, glial cell differentiation regulator
ENSG00000109814	UGDH	1.35322	7.58025e-27	1.61008	3.24209e-05	significant	GRAM domain containing 1B
ENSG00000110987	BCL7A	1.35094	0.000272871	0.738217	1.0263e-05	not_significant	discoidin, CUB and LCCL domain containing 1
ENSG00000271303	SRXN1	1.35088	4.22599e-13	1.11455	3.44051e-07	significant	PVR cell adhesion molecule
ENSG00000147065	MSN	1.35075	2.42895e-17	1.57974	7.90816e-13	significant	elongin A
ENSG00000249859	PVT1	1.35025	2.75371e-18	1.19933	1.52199e-06	significant	dual specificity phosphatase 7
ENSG00000074590	NUAK1	1.34951	0.00360191	2.71156	1.18726e-09	significant	DnaJ heat shock protein family (Hsp40) member C2
ENSG00000164211	STARD4	1.34906	0.0209128	1.53474	0.000950391	significant	annexin A8 like 1
ENSG00000109917	ZPR1	1.34854	2.29112e-17	1.52446	7.59159e-05	significant	sprouty RTK signaling antagonist 2
ENSG00000258425		1.34823	0.0484944	1.38245	2.52572e-14	significant	peroxisome proliferator activated receptor delta
ENSG00000006451	RALA	1.34815	6.61355e-39	1.10745	0.0156033	significant	delta/notch like EGF repeat containing
ENSG00000115758	ODC1	1.34788	5.08643e-08	1.32406	0.000220561	significant	lysine demethylase 7A
ENSG00000140564	FURIN	1.34537	3.72288e-32	1.22297	3.16418e-13	significant	TATA-box binding protein associated factor 13
ENSG00000124831	LRRFIP1	1.34466	3.45787e-13	1.09672	0.00125044	significant
ENSG00000116679	IVNS1ABP	1.3441	3.09843e-21	0.97292	0.000183543	significant	solute carrier family 4 member 4
ENSG00000151576	QTRT2	1.34131	5.94616e-21	1.30944	0.441629	significant
ENSG00000115844	DLX2	1.34117	0.0106911	1.00123	6.95128e-10	significant	basic leucine zipper and W2 domains 2
ENSG00000175040	CHST2	1.34099	3.62354e-05	0.606363	4.33261e-38	not_significant	hypoxia inducible factor 1 subunit alpha
ENSG00000011198	ABHD5	1.34038	8.68407e-12	1.16395	4.32504e-14	significant	zinc finger protein 432
ENSG00000109519	GRPEL1	1.33745	7.50771e-15	1.51344	5.05389e-42	significant	family with sequence similarity 168 member A
ENSG00000163874	ZC3H12A	1.33367	0.00264212	0.942495	6.04188e-19	significant	SDE2 telomere maintenance homolog
ENSG00000160818	GPATCH4	1.33269	4.65799e-11	1.40968	4.83221e-05	significant	G-patch domain containing 4
ENSG00000156136	DCK	1.32905	2.7786e-11	1.44348	3.79754e-05	significant	TCDD inducible poly(ADP-ribose) polymerase
ENSG00000011007	ELOA	1.32841	4.52085e-23	1.43159	5.24851e-05	significant	heat shock protein family A (Hsp70) member 5
ENSG00000166825	ANPEP	1.32784	3.58843e-05	2.19375	2.15359e-05	significant	cyclin D1
ENSG00000101333	PLCB4	1.32563	8.32465e-15	1.2099	0.0390773	significant
ENSG00000136158	SPRY2	1.32529	8.19671e-05	1.42497	6.63104e-08	significant	testis expressed 10
ENSG00000101194	SLC17A9	1.32451	5.3267e-21	1.88581	0.0160075	significant	major facilitator superfamily domain containing 2A
ENSG00000198517	MAFK	1.32323	8.89019e-08	1.27697	4.42632e-06	significant	hydroxypyruvate isomerase (putative)
ENSG00000073711	PPP2R3A	1.3207	5.36299e-16	1.38489	5.89432e-12	significant	dishevelled segment polarity protein 1
ENSG00000180667	YOD1	1.3204	1.27998e-11	1.80998	8.30166e-09	significant	RUN and SH3 domain containing 2
ENSG00000213853	EMP2	1.31894	2.17156e-08	0.777513	6.54559e-13	significant	SEC24 homolog A, COPII coat complex component
ENSG00000107338	SHB	1.31724	1.39753e-15	1.88152	1.94054e-07	significant	GLI pathogenesis related 2
ENSG00000157064	NMNAT2	1.31544	1.64447e-08	1.34839	4.4715e-08	significant	vitamin D receptor
ENSG00000104885	DOT1L	1.31515	2.02938e-05	0.970124	8.34226e-11	significant	mitogen-activated protein kinase 8
ENSG00000055044	NOP58	1.31441	1.13944e-33	1.27619	6.50839e-06	significant	tribbles pseudokinase 2
ENSG00000197451	HNRNPAB	1.31406	9.59548e-15	1.28183	8.00922e-05	significant	phosphodiesterase 4D
ENSG00000122863	CHST3	1.31327	2.86403e-09	1.24835	4.82399e-09	significant	protein phosphatase 2 regulatory subunit B''alpha
ENSG00000067177	PHKA1	1.31153	0.0011854	1.77951	0.000322236	significant	membrane associated ring-CH-type finger 4
ENSG00000104635	SLC39A14	1.31055	1.07086e-06	1.46762	0.0414623	significant
ENSG00000122694	GLIPR2	1.31013	2.61907e-16	1.39432	2.68346e-12	significant	Rho GTPase activating protein 31
ENSG00000148843	PDCD11	1.30957	5.93136e-14	1.4458	1.8677e-09	significant	BAI1 associated protein 2 like 1
ENSG00000255717	SNHG1	1.30807	7.26443e-08	1.19123	8.98323e-14	significant	zinc finger and BTB domain containing 21
ENSG00000186594	MIR22HG	1.30612	7.40526e-10	1.48695	2.02819e-13	significant	G protein nucleolar 3
ENSG00000165338	HECTD2	1.30587	5.91054e-15	1.82863	1.59723e-09	significant	ribosomal RNA processing 1
ENSG00000166503	HDGFL3	1.30485	4.15359e-18	1.96755	1.91774e-18	significant	spire type actin nucleation factor 1
ENSG00000257553		1.30332	0.00377725	0.752585	3.36818e-11	not_significant	pleckstrin homology and RhoGEF domain containing G5
ENSG00000149633	KIAA1755	1.30226	5.30484e-06	2.98989	0.00129023	significant	collagen type V alpha 1 chain
ENSG00000163743	RCHY1	1.30052	8.77542e-22	1.05026	1.05147e-12	significant	autophagy related 101
ENSG00000124208	TMEM189-UBE2V1	1.2983	0.000141853	1.09419	0.186858	significant	neuronal pentraxin 1
ENSG00000147224	PRPS1	1.29302	2.67723e-14	2.64764	1.43577e-06	significant	Kruppel like factor 16
ENSG00000076356	PLXNA2	1.29274	2.28419e-05	1.24465	0.00444649	significant	NHS actin remodeling regulator
ENSG00000198053	SIRPA	1.29269	1.6474e-11	1.26073	0.00121932	significant	zinc finger protein 185 with LIM domain
ENSG00000151247	EIF4E	1.29262	4.14354e-17	1.21904	7.17217e-14	significant	phosphatidylinositol binding clathrin assembly protein
ENSG00000224032		1.291	4.38085e-10	0.862072	0.000155667	significant	unc-51 like autophagy activating kinase 1
ENSG00000132382	MYBBP1A	1.29048	6.42937e-18	1.45882	5.25679e-09	significant	clustered mitochondria homolog
ENSG00000059377	TBXAS1	1.28834	0.00215394	0.30182	8.19368e-07	not_significant	ribosome production factor 2 homolog
ENSG00000163938	GNL3	1.28667	9.00638e-27	1.37639	0.00835817	significant
ENSG00000072133	RPS6KA6	1.28631	4.70637e-05	-0.0919799	6.42797e-09	not_significant	NOP2/Sun RNA methyltransferase 2
ENSG00000073921	PICALM	1.28399	1.46305e-13	1.36221	2.19929e-08	significant	cysteine and glycine rich protein 1
ENSG00000069869	NEDD4	1.2836	3.88115e-13	1.16625	7.66459e-07	significant	GAR1 ribonucleoprotein
ENSG00000182831	C16orf72	1.28355	2.20568e-08	1.26641	5.12186e-11	significant	WD repeat domain 3
ENSG00000170027	YWHAG	1.28274	2.29629e-28	1.47084	6.89527e-18	significant	LEM domain containing 3
ENSG00000183853	KIRREL1	1.27533	8.55689e-12	1.49373	9.6572e-09	significant	tyrosylprotein sulfotransferase 1
ENSG00000150990	DHX37	1.27362	7.99147e-08	1.48103	1.91409e-12	significant	ankyrin repeat and LEM domain containing 2
ENSG00000109534	GAR1	1.27064	5.4442e-15	1.35712	0.00953156	significant	matrix metallopeptidase 16
ENSG00000197415	VEPH1	1.27005	3.23354e-06	1.22283	0.000168417	significant	RIC1 homolog, RAB6A GEF complex partner 1
ENSG00000109320	NFKB1	1.26991	6.28376e-11	0.996691	6.05737e-09	significant	FERM domain containing 6
ENSG00000163602	RYBP	1.26977	9.41168e-05	1.33183	6.31798e-07	significant	nicotinamide nucleotide adenylyltransferase 2
ENSG00000137124	ALDH1B1	1.264	3.71688e-06	1.23612	5.87806e-06	significant	hypoxia up-regulated 1
ENSG00000254093	PINX1	1.26371	1.81814e-12	1.24851	4.73306e-07	significant	RAB3B, member RAS oncogene family
ENSG00000113716	HMGXB3	1.2637	7.33781e-31	1.10635	1.79925e-08	significant	Rab geranylgeranyltransferase subunit beta
ENSG00000205277	MUC12	1.26323	0.0117957	0.963507	2.90477e-06	not_significant	G protein-coupled receptor 180
ENSG00000160214	RRP1	1.26023	1.67093e-15	1.37588	3.31057e-06	significant	La ribonucleoprotein domain family member 1B
ENSG00000132361	CLUH	1.25752	9.33509e-11	1.3597	1.43893e-11	significant	FtsJ RNA 2'-O-methyltransferase 1
ENSG00000142149	HUNK	1.25656	0.0282779	0.689335	3.30281e-27	not_significant	sorting nexin family member 30
ENSG00000187678	SPRY4	1.25604	0.00111382	1.69688	2.33653e-07	significant	vasodilator stimulated phosphoprotein
ENSG00000138050	THUMPD2	1.2535	9.0816e-17	1.12795	5.45023e-06	significant	6-phosphofructo-2-kinase/fructose-2,6-biphosphatase 3
ENSG00000166226	CCT2	1.25329	6.03902e-21	1.28232	2.50786e-06	significant	RING1 and YY1 binding protein
ENSG00000039560	RAI14	1.25304	9.06538e-21	1.18205	7.37064e-14	significant	protein kinase Y-linked (pseudogene)
ENSG00000205730	ITPRIPL2	1.25218	2.29641e-16	1.17574	0.06826	significant
ENSG00000152242	C18orf25	1.2503	9.01444e-31	1.64025	2.51892e-18	significant	SMAD specific E3 ubiquitin protein ligase 1
ENSG00000162618	ADGRL4	1.24937	4.83191e-07	1.8459	3.0438e-11	significant	prefoldin subunit 2
ENSG00000196497	IPO4	1.24784	2.54931e-14	1.20331	3.91742e-15	significant	elongation factor for RNA polymerase II 2
ENSG00000275400		1.24772	2.39577e-05	0.152738	0.00340558	not_significant	ornithine decarboxylase 1
ENSG00000139508	SLC46A3	1.24715	0.000867703	0.494107	4.85508e-06	not_significant	maternally expressed 9
ENSG00000236456		1.24651	0.0226841	1.22302	1.04007e-05	significant	signal sequence receptor subunit 3
ENSG00000106070	GRB10	1.24639	1.75072e-22	2.03624	0.107747	significant	fatty acid binding protein 5
ENSG00000179859	RNF227	1.2463	0.00918894	1.04935	1.06391e-13	not_significant	serum response factor
ENSG00000172175	MALT1	1.24585	1.19324e-16	1.24169	5.55665e-21	significant	protein tyrosine phosphatase receptor type K
ENSG00000173542	MOB1B	1.24568	1.35452e-25	1.70247	8.9488e-07	significant	PPARG related coactivator 1
ENSG00000257949	TEN1	1.24544	6.44233e-08	1.1999	1.96022e-11	significant	chromodomain Y like
ENSG00000130810	PPAN	1.24507	8.89677e-12	1.51326	0.00403843	significant	neurotrimin
ENSG00000123395	ATG101	1.2448	3.33776e-12	1.36834	8.09372e-12	significant	CDC42 small effector 1
ENSG00000188158	NHS	1.24472	0.0140229	1.36384	0.00461817	significant	solute carrier family 20 member 1
ENSG00000037474	NSUN2	1.24425	7.5008e-23	1.35816	0.00405905	significant	glycerol kinase
ENSG00000162413	KLHL21	1.24297	1.91552e-13	1.18433	1.87216e-16	significant	nuclear receptor corepressor 2
ENSG00000169764	UGP2	1.24268	4.99425e-18	1.13027	4.52843e-05	significant	centrosomal protein 170
ENSG00000234160		1.24138	0.0181624	0.762417	3.02453e-07	not_significant	queuine tRNA-ribosyltransferase accessory subunit 2
ENSG00000161091	MFSD12	1.23803	3.44609e-17	1.54831	1.3009e-17	significant	NMD3 ribosome export adaptor
ENSG00000136891	TEX10	1.23616	4.72851e-17	1.40597	5.94626e-05	significant	C-X9-C motif containing 2
ENSG00000169213	RAB3B	1.23591	0.000896175	1.34237	0.00456258	significant	zinc finger SWIM-type containing 4
ENSG00000161960	EIF4A1	1.23459	2.77003e-26	1.22143	3.83149e-09	significant	LanC like 2
ENSG00000080823	MOK	1.23455	5.55419e-05	1.21127	3.6262e-06	significant	mesencephalic astrocyte derived neurotrophic factor
ENSG00000197646	PDCD1LG2	1.23009	3.6447e-06	1.90683	4.96229e-07	significant	glutamate-cysteine ligase catalytic subunit
ENSG00000185950	IRS2	1.22703	2.30941e-16	1.90519	0.00459253	significant	IER3 antisense RNA 1
ENSG00000147394	ZNF185	1.22548	0.00675189	1.36226	4.66409e-21	significant	prolyl 4-hydroxylase subunit alpha 2
ENSG00000001084	GCLC	1.22314	4.27961e-14	1.30606	2.87745e-12	significant	ADP ribosylation factor GTPase activating protein 1
ENSG00000103064	SLC7A6	1.22307	1.19635e-05	1.24884	1.3282e-17	significant	BCL2 associated athanogene 3
ENSG00000105821	DNAJC2	1.2229	1.0529e-14	1.43035	0.0518783	significant
ENSG00000188643	S100A16	1.22261	1.63927e-10	1.11081	4.34435e-05	significant	ribosomal RNA processing 15 homolog
ENSG00000111780		1.22234	0.0466442	0.383818	1.43304e-12	not_significant	ubiquitin specific peptidase like 1
ENSG00000159176	CSRP1	1.2223	2.92855e-07	1.35804	8.238e-06	significant	fms related tyrosine kinase 1
ENSG00000184584	TMEM173	1.22194	8.89425e-15	1.50233	0.00305653	significant	alpha kinase 2
ENSG00000065183	WDR3	1.22175	1.47546e-18	1.35615	1.64172e-07	significant	glutamate rich WD repeat containing 1
ENSG00000240225	ZNF542P	1.2202	1.04235e-14	0.886018	8.90763e-13	significant	coiled-coil domain containing 93
ENSG00000037897	METTL1	1.21988	4.63172e-16	1.1789	2.00265e-09	significant	defective in cullin neddylation 1 domain containing 5
ENSG00000228106		1.21937	0.000582541	0.708123	1.97e-09	not_significant	trio Rho guanine nucleotide exchange factor
ENSG00000168214	RBPJ	1.21847	1.27091e-22	0.926993	7.99889e-06	significant	ankyrin repeat and BTB domain containing 2
ENSG00000274307		1.21776	3.1566e-05	1.00741	1.64388e-05	significant	family with sequence similarity 216 member A
ENSG00000175166	PSMD2	1.21694	2.95984e-14	1.46146	9.83958e-11	significant	DIMT1 rRNA methyltransferase and ribosome maturation factor
ENSG00000235531	MSC-AS1	1.21291	0.000125884	0.535644	0.000262411	not_significant	EPH receptor B2
ENSG00000031081	ARHGAP31	1.21055	4.04864e-19	1.38209	2.40908e-24	significant	four and a half LIM domains 2
ENSG00000100219	XBP1	1.20965	4.07671e-11	1.27844	6.63236e-06	significant	ETS proto-oncogene 2, transcription factor
ENSG00000164674	SYTL3	1.20945	3.1441e-11	1.08586	1.45614e-10	significant	suppressor of cytokine signaling 6
ENSG00000134516	DOCK2	1.20924	1.17947e-13	0.876535	4.25787e-17	not_significant	RNA polymerase III subunit D
ENSG00000187555	USP7	1.20889	2.89426e-24	1.15679	1.45529e-08	significant	RNA polymerase I and III subunit C
ENSG00000280143		1.20709	0.00772445	0.946145	7.36562e-07	significant	chaperonin containing TCP1 subunit 2
ENSG00000205571	SMN1	1.20682	3.39746e-07	0.651242	8.01808e-05	not_significant	heterogeneous nuclear ribonucleoprotein A/B
ENSG00000163597	SNHG16	1.20359	2.36108e-35	1.08183	0.0525276	significant	SHC adaptor protein 4
ENSG00000149428	HYOU1	1.2031	3.63955e-11	1.34632	0.315607	significant	neurotrophic receptor tyrosine kinase 3
ENSG00000086544	ITPKC	1.20297	0.000163152	0.64381	1.51133e-07	significant	X-box binding protein 1
ENSG00000161638	ITGA5	1.20143	8.6917e-14	1.54463	1.99737e-06	significant	paxillin
ENSG00000074356	NCBP3	1.20047	1.63519e-13	0.927475	6.50039e-07	significant	MAF bZIP transcription factor K
ENSG00000204217	BMPR2	1.20033	1.32569e-15	1.21892	0.000110039	significant	MSANTD3-TMEFF1 readthrough
ENSG00000268750		1.1988	0.00136234	1.18809	5.66446e-05	significant	NOP58 ribonucleoprotein
ENSG00000240764	PCDHGC5	1.19609	2.11632e-08	1.49776	1.15132e-14	significant	solute carrier family 9 member A1
ENSG00000129245	FXR2	1.19566	1.18273e-32	1.25015	4.34705e-05	significant	protein phosphatase 1 regulatory subunit 3B
ENSG00000124787	RPP40	1.19402	3.96174e-11	1.20291	2.76477e-11	significant	ATPase phospholipid transporting 10A (putative)
ENSG00000067533	RRP15	1.19384	4.27842e-12	1.297	3.77486e-07	significant	PDS5 cohesin associated factor B
ENSG00000092820	EZR	1.19336	2.70329e-07	0.488262	0.00637993	not_significant	ATPase Na+/K+ transporting subunit beta 1
ENSG00000107643	MAPK8	1.19094	5.6888e-18	1.39237	3.89727e-24	significant	family with sequence similarity 214 member B
ENSG00000198742	SMURF1	1.18997	1.21579e-20	1.32747	3.80796e-11	significant	calmodulin 2
ENSG00000233864		1.18922	1.57509e-08	0.844538	1.61556e-06	significant	sphingosine-1-phosphate lyase 1
ENSG00000172061	LRRC15	1.1887	2.31859e-10	1.69849	0.00298617	significant	solute carrier family 7 member 8
ENSG00000104312	RIPK2	1.18846	1.73113e-07	2.07111	3.422e-13	significant	chromosome 16 open reading frame 72
ENSG00000117394	SLC2A1	1.18844	0.000165075	1.93721	0.00449124	significant
ENSG00000160208	RRP1B	1.18738	1.61475e-21	1.07999	1.4823e-06	significant	tRNA methyltransferase 6
ENSG00000114767	RRP9	1.18589	1.23045e-10	1.09697	1.73855e-12	significant	signal regulatory protein alpha
ENSG00000185338	SOCS1	1.18588	0.030912	-0.00860538	3.11781e-06	not_significant	G1 to S phase transition 1
ENSG00000168994	PXDC1	1.18555	0.00029767	1.44381	1.65398e-06	significant	translocase of inner mitochondrial membrane 8A
ENSG00000144597	EAF1	1.18413	1.35707e-17	1.18308	2.28638e-13	significant	family with sequence similarity 210 member A
ENSG00000164574	GALNT10	1.18402	1.97994e-14	2.01672	5.2184e-07	significant	membrane palmitoylated protein 6
ENSG00000240849	TMEM189	1.18272	1.86215e-06	0.957698	2.62597e-13	significant	FMR1 autosomal homolog 2
ENSG00000124216	SNAI1	1.18248	0.0316992	1.17184	2.39719e-10	significant	solute carrier family 7 member 6
ENSG00000160201	U2AF1	1.18114	7.61602e-14	0.940429	1.17181e-05	significant	PIN2 (TERF1) interacting telomerase inhibitor 1
ENSG00000125630	POLR1B	1.17858	2.5966e-10	1.1209	1.52199e-06	significant	carbohydrate sulfotransferase 3
ENSG00000013375	PGM3	1.17858	1.81105e-23	1.62116	9.44409e-10	significant	rhomboid 5 homolog 2
ENSG00000113615	SEC24A	1.17764	3.97763e-17	1.39965	9.8636e-05	significant
ENSG00000124784	RIOK1	1.17419	1.72276e-20	1.47225	2.4634e-06	significant	plexin A2
ENSG00000171453	POLR1C	1.17418	3.84704e-15	1.28255	0.00029832	significant	sacsin molecular chaperone
ENSG00000058091	CDK14	1.17407	4.80719e-09	1.50991	2.79749e-13	significant	MALT1 paracaspase
ENSG00000143933	CALM2	1.17293	1.3998e-18	1.26884	5.33825e-13	significant	YKT6 v-SNARE homolog
ENSG00000099725	PRKY	1.17252	2.39458e-21	1.3304	8.20781e-05	significant	cryptochrome circadian regulator 1
ENSG00000127334	DYRK2	1.17225	1.20875e-05	1.14711	7.22413e-06	significant	cytochrome c, somatic
ENSG00000261114		1.16963	0.0200566	0.240848	0.000882195	not_significant	ZFP69 zinc finger protein B
ENSG00000072682	P4HA2	1.16937	2.93736e-10	1.30026	1.01756e-07	significant	aldehyde dehydrogenase 1 family member B1
ENSG00000116649	SRM	1.16758	9.06333e-19	1.17177	1.76353e-06	significant	nucleoporin 58
ENSG00000111424	VDR	1.16665	3.30414e-06	1.3927	3.43739e-08	significant	solute carrier family 16 member 3
ENSG00000164163	ABCE1	1.1666	1.86902e-22	1.11298	0.00526563	significant	sortilin related VPS10 domain containing receptor 2
ENSG00000107443	CCNJ	1.16636	4.77108e-13	1.18903	4.49336e-13	significant	tRNA methyltransferase 1
ENSG00000138709	LARP1B	1.16518	2.06182e-14	1.3391	3.04769e-12	significant	NUS1 dehydrodolichyl diphosphate synthase subunit
ENSG00000103121	CMC2	1.16501	1.5586e-10	1.30742	3.72048e-05	significant	leucine rich repeat containing 59
ENSG00000274654		1.16374	0.0427293	2.15067	4.90997e-07	significant	BCL9 like
ENSG00000164338	UTP15	1.16353	8.48561e-15	1.06497	1.08185e-15	significant
ENSG00000143322	ABL2	1.16331	3.41871e-09	1.4495	1.55997e-16	significant	zinc finger SWIM-type containing 6
ENSG00000157617	C2CD2	1.16239	5.46653e-11	1.18963	1.89343e-11	significant	transcription activation suppressor family member 2
ENSG00000136950	ARPC5L	1.16232	8.5591e-11	1.22419	2.26634e-08	significant	zinc finger protein 597
ENSG00000128487	SPECC1	1.16219	3.26425e-11	0.604685	1.42341e-09	significant	periodic tryptophan protein 2 homolog
ENSG00000197780	TAF13	1.16184	2.26622e-10	1.42058	9.54293e-11	significant	TSR1 ribosome maturation factor
ENSG00000125753	VASP	1.16107	7.79789e-05	1.33439	2.40738e-05	significant	actin related protein 2/3 complex subunit 5 like
ENSG00000188807	TMEM201	1.16095	4.09044e-09	1.00203	1.41685e-06	significant	family with sequence similarity 98 member A
ENSG00000159363	ATP13A2	1.15996	3.10294e-12	1.13176	3.46161e-07	significant	survival of motor neuron 1, telomeric
ENSG00000283251		1.15929	0.00808179	1.73652	3.58024e-05	significant	leucine rich repeat containing 8 VRAC subunit D
ENSG00000146094	DOK3	1.15921	0.000290991	1.88912	0.0337433	significant
ENSG00000140443	IGF1R	1.15911	1.22891e-08	-0.0862819	1.1454e-21	not_significant	furin, paired basic amino acid cleaving enzyme
ENSG00000170525	PFKFB3	1.15874	2.83372e-05	1.33299	1.91208e-05	significant	ventricular zone expressed PH domain containing 1
ENSG00000250506	CDK3	1.15796	6.5952e-05	1.0036	1.34353e-08	significant	eukaryotic translation initiation factor 4A1
ENSG00000178896	EXOSC4	1.1572	1.46305e-13	0.909484	3.17996e-13	significant	LDL receptor related protein 12
ENSG00000168389	MFSD2A	1.15566	0.00105863	1.40455	7.30881e-06	significant	pseudouridine synthase 7
ENSG00000087008	ACOX3	1.15564	8.66914e-10	1.6317	3.96157e-06	significant	eukaryotic translation initiation factor 4E
ENSG00000156265	MAP3K7CL	1.15328	0.000167517	0.822817	1.34437e-10	significant	bone morphogenetic protein receptor type 2
ENSG00000066697	MSANTD3	1.15316	5.28097e-16	1.14827	1.50198e-15	significant	DEAD-box helicase 31
ENSG00000235884		1.15137	3.86789e-09	1.19131	5.37926e-13	significant	fermitin family member 2
ENSG00000229334		1.15074	0.00162652	0.980787	1.14522e-18	significant	trafficking protein particle complex 10
ENSG00000156313	RPGR	1.14478	1.85575e-09	1.48678	1.36714e-07	significant	solute carrier family 41 member 1
ENSG00000139173	TMEM117	1.1407	3.10559e-14	0.788434	2.79749e-13	significant	GEM interacting protein
ENSG00000167721	TSR1	1.14047	2.70774e-16	1.22478	2.36936e-14	significant	serine incorporator 5
ENSG00000166451	CENPN	1.14004	3.08452e-06	1.48281	9.09917e-12	significant	cysteine rich hydrophobic domain 2
ENSG00000137692	DCUN1D5	1.13988	4.29321e-30	1.29264	0.0222367	significant	syntaxin 1A
ENSG00000065621	GSTO2	1.13841	1.53699e-08	1.17069	4.59912e-05	significant
ENSG00000171208	NETO2	1.13778	0.000940883	0.841421	0.000983885	not_significant	MOK protein kinase
ENSG00000168495	POLR3D	1.13695	1.94182e-16	1.28261	6.20313e-12	significant	DEAD-box helicase 10
ENSG00000142303	ADAMTS10	1.13628	0.0432461	0.722809	3.02364e-08	not_significant	syndecan 4
ENSG00000114850	SSR3	1.13618	9.26243e-21	1.32269	7.21758e-06	significant	MAM domain containing glycosylphosphatidylinositol anchor 1
ENSG00000164045	CDC25A	1.13573	0.0279617	0.834652	3.84097e-06	not_significant	phospholipase C beta 4
ENSG00000256663		1.13549	0.0177878	0.339566	0.00168759	not_significant	cyclin dependent kinase 5 regulatory subunit 1
ENSG00000197019	SERTAD1	1.13445	3.83971e-05	1.57703	1.94208e-08	significant	nuclear assembly factor 1 ribonucleoprotein
ENSG00000261740	BOLA2-SMG1P6	1.13404	2.56653e-08	1.07422	4.39207e-13	significant	selenoprotein S
ENSG00000004961	HCCS	1.13308	2.10406e-52	1.0024	6.13225e-07	significant
ENSG00000172115	CYCS	1.13265	2.00383e-17	1.23971	3.95947e-07	significant	importin 4
ENSG00000134109	EDEM1	1.13252	1.3651e-23	1.12441	0.0138265	significant	BCL6 corepressor
ENSG00000235852		1.12919	0.000260973	0.656118	3.60185e-05	not_significant	ribonuclease P/MRP subunit p40
ENSG00000264772		1.12894	0.000270517	0.969312	0.417232	significant
ENSG00000102385	DRP2	1.12759	3.01769e-05	3.29169	8.83092e-07	significant	nucleolar protein 6
ENSG00000123545	NDUFAF4	1.12747	2.91892e-16	1.0346	6.50137e-15	significant	M-phase phosphoprotein 10
ENSG00000131873	CHSY1	1.12655	1.63567e-07	1.1231	0.000668243	significant	TEN1 subunit of CST complex
ENSG00000198853	RUSC2	1.12583	1.62664e-11	1.39971	4.86792e-09	significant	dual specificity phosphatase 16
ENSG00000148840	PPRC1	1.12501	1.13097e-12	1.31589	0.000150246	significant	UTP20 small subunit processome component
ENSG00000167977	KCTD5	1.12461	1.81409e-18	1.13028	6.61486e-09	significant	Pvt1 oncogene
ENSG00000212123	PRR22	1.12441	0.00281317	0.808177	8.47988e-19	not_significant	golgi SNAP receptor complex member 2
ENSG00000196935	SRGAP1	1.12327	1.49365e-22	0.997627	4.58975e-06	significant	small nucleolar RNA host gene 17
ENSG00000133121	STARD13	1.12133	0.00207322	1.60275	5.51566e-07	significant	DDB1 and CUL4 associated factor 13
ENSG00000110427	KIAA1549L	1.12006	4.242e-07	1.7576	4.06436e-10	significant	aldehyde dehydrogenase 18 family member A1
ENSG00000204147	ASAH2B	1.11984	1.98665e-09	0.775837	0.00213889	significant	uncharacterized LOC100379224
ENSG00000108829	LRRC59	1.1187	2.85994e-16	1.23357	4.79198e-06	significant	low density lipoprotein receptor class A domain containing 3
ENSG00000170624	SGCD	1.11732	9.91354e-09	0.936396	0.000917445	significant	single-pass membrane protein with coiled-coil domains 4
ENSG00000196196	HRCT1	1.1164	8.43652e-08	1.70086	1.72247e-09	significant	potassium channel tetramerization domain containing 5 pseudogene
ENSG00000196628	TCF4	1.11601	3.40049e-11	1.12915	4.01465e-05	significant	small integral membrane protein 13
ENSG00000173540	GMPPB	1.11516	6.53056e-15	1.14844	0.000265934	significant
ENSG00000086189	DIMT1	1.11406	9.20938e-19	1.28803	0.000716316	significant	heat shock protein family H (Hsp110) member 1
ENSG00000204856	FAM216A	1.11369	3.64495e-08	1.28931	0.00546645	significant	small nucleolar RNA host gene 1
ENSG00000186019	LOC100379224	1.11349	5.65235e-05	1.19437	1.88385e-11	significant	neuronal calcium sensor 1
ENSG00000104907	TRMT1	1.11269	1.85653e-15	1.23554	1.60104e-11	significant	C2 calcium dependent domain containing 2
ENSG00000142910	TINAGL1	1.11199	0.0269845	0.493891	6.95513e-08	not_significant	cyclin J
ENSG00000115648	MLPH	1.11162	0.00982666	0.681125	0.00510449	not_significant
ENSG00000280173		1.11143	3.13402e-05	0.930501	0.000137678	significant	PAK1 interacting protein 1
ENSG00000105447	GRWD1	1.11002	4.14389e-14	1.29518	8.91618e-11	significant	kelch like family member 21
ENSG00000151287	TEX30	1.10958	1.08538e-05	0.990346	1.28209e-05	not_significant	myocardin
ENSG00000213846		1.10956	2.4854e-07	0.992934	4.96596e-09	significant	transforming growth factor beta 1
ENSG00000147883	CDKN2B	1.10955	5.59747e-11	2.20762	3.06005e-08	significant	diphthamide biosynthesis 2
ENSG00000157514	TSC22D3	1.10946	0.00366064	1.6162	2.04932e-12	significant	ELL associated factor 1
ENSG00000257663		1.10695	0.0396398	0.891834	1.15347e-19	not_significant	retinoic acid induced 14
ENSG00000100029	PES1	1.10474	1.07616e-14	1.15105	0.000298746	significant	methyltransferase like 1
ENSG00000152484	USP12	1.10448	4.2245e-24	0.882846	1.1819e-12	significant	solute carrier family 10 member 3
ENSG00000137955	RABGGTB	1.10415	8.22023e-32	1.34105	3.89311e-07	significant	NRAS proto-oncogene, GTPase
ENSG00000278341		1.10251	0.00222515	1.42042	1.51923e-05	significant	dual specificity phosphatase 1
ENSG00000033178	UBA6	1.101	8.65587e-28	1.4448	6.6208e-09	significant	translocase of inner mitochondrial membrane 17A
ENSG00000177889	UBE2N	1.10045	2.24098e-28	1.15275	3.27769e-10	significant	ITPRIP like 2
ENSG00000173276	ZBTB21	1.10006	8.48939e-08	1.37686	3.76823e-06	significant	ETS transcription factor ELK3
ENSG00000062716	VMP1	1.09931	2.74761e-11	0.805146	3.37715e-05	significant	major histocompatibility complex, class I, L (pseudogene)
ENSG00000108021	TASOR2	1.0993	7.79478e-16	1.23119	0.103262	significant
ENSG00000258777	HIF1A-AS1	1.0983	0.0439	1.82131	0.00522495	significant	snail family transcriptional repressor 1
ENSG00000139496	NUP58	1.09371	7.08728e-18	1.23583	5.01687e-16	significant	solute carrier family 35 member E1
ENSG00000141378	PTRH2	1.09367	6.07064e-09	1.07709	8.61057e-08	significant	spermidine synthase
ENSG00000141076	UTP4	1.09255	1.76009e-12	1.05614	6.47071e-08	significant	glutathione S-transferase omega 2
ENSG00000138448	ITGAV	1.09159	2.84108e-06	0.989777	9.54781e-17	significant	ubiquitin like 3
ENSG00000110092	CCND1	1.09055	0.000595984	1.40785	3.468e-09	significant	glutamate ionotropic receptor NMDA type subunit 2D
ENSG00000123473	STIL	1.08972	8.90884e-05	0.907429	0.00532776	not_significant	chondroitin sulfate proteoglycan 4
ENSG00000072110	ACTN1	1.08939	6.58029e-08	1.16257	4.17288e-06	significant	LTV1 ribosome biogenesis factor
ENSG00000197555	SIPA1L1	1.08697	5.33593e-06	0.731941	3.06764e-11	significant	neuron navigator 1
ENSG00000135521	LTV1	1.0847	4.09633e-16	1.16716	0.000644542	significant	transmembrane protein 217
ENSG00000136802	LRRC8A	1.08454	3.71881e-09	1.46479	0.151975	significant	transmembrane protein 100
ENSG00000179051	RCC2	1.08445	3.91101e-08	1.07454	5.68885e-07	significant	NEDD4 E3 ubiquitin protein ligase
ENSG00000117143	UAP1	1.0843	1.62547e-05	1.50803	0.027165	significant	inhibitory synaptic factor family member 2B
ENSG00000139629	GALNT6	1.08362	9.94419e-06	1.12561	1.11955e-18	not_significant	zinc finger protein 593
ENSG00000167088	SNRPD1	1.08262	2.32912e-10	1.05436	1.4579e-09	significant	abhydrolase domain containing 5
ENSG00000132768	DPH2	1.07999	2.14577e-17	1.18341	9.68129e-11	significant	actinin alpha 1
ENSG00000185344	ATP6V0A2	1.07997	1.3161e-08	1.82072	0.00168502	significant	SH3 domain binding protein 1
ENSG00000116711	PLA2G4A	1.07851	0.0389694	0.255832	7.93796e-05	not_significant	MARCKS like 1
ENSG00000165997	ARL5B	1.0781	5.70854e-05	0.977576	3.17566e-11	significant	ubiquitin specific peptidase 7
ENSG00000172062	SMN1	1.0775	7.35725e-09	1.22375	4.08671e-07	significant	SPARC (osteonectin), cwcv and kazal like domains proteoglycan 1
ENSG00000186432	KPNA4	1.07716	7.19405e-14	1.0917	7.19944e-09	significant	phosphomannomutase 2
ENSG00000185022	MAFF	1.07674	0.0004877	0.679246	0.0207864	significant	family with sequence similarity 174 member B
ENSG00000164465	DCBLD1	1.07665	2.43738e-11	1.43424	3.49812e-05	significant	vascular endothelial growth factor C
ENSG00000177034	MTX3	1.07497	6.90598e-10	0.498196	2.32896e-06	significant	ubiquitin conjugating enzyme E2 N
ENSG00000131871	SELENOS	1.07464	9.11572e-18	1.20579	4.36671e-06	significant	serine palmitoyltransferase long chain base subunit 2
ENSG00000120942	UBIAD1	1.07431	1.39727e-17	0.861565	1.62046e-17	significant	disco interacting protein 2 homolog B
ENSG00000105926	MPP6	1.07304	4.18887e-08	1.2548	1.03027e-09	significant	pescadillo ribosomal biogenesis factor 1
ENSG00000103342	GSPT1	1.07277	6.48246e-18	1.2592	0.150973	significant
ENSG00000173210	ABLIM3	1.07017	2.53987e-06	0.982621	0.150973	significant
ENSG00000066084	DIP2B	1.06953	7.47811e-30	1.15117	0.150973	significant	RNA, 5.8S ribosomal N3
ENSG00000235313		1.06932	0.0387758	1.59952	0.150973	significant
ENSG00000111186	WNT5B	1.06925	0.000328485	1.75512	0.150973	significant
ENSG00000134278	SPIRE1	1.06778	1.89237e-25	1.37006	0.150973	significant
ENSG00000112655	PTK7	1.06684	8.0587e-10	0.590013	0.150973	not_significant	RNA, 5.8S ribosomal N1
ENSG00000280355		1.06658	1.70116e-05	1.24512	0.150973	significant	RNA, 5.8S ribosomal N2
ENSG00000144381	HSPD1	1.06628	2.29435e-11	1.09513	4.04602e-05	significant	GDP-mannose pyrophosphorylase B
ENSG00000088205	DDX18	1.06587	6.48798e-27	1.10384	1.96981e-07	significant	Myb/SANT DNA binding domain containing 3
ENSG00000089639	GMIP	1.06406	5.24784e-13	1.21553	2.44981e-10	significant	stress associated endoplasmic reticulum protein 1
ENSG00000126562	WNK4	1.06191	0.00110193	0.932553	7.48261e-11	significant	dual specificity tyrosine phosphorylation regulated kinase 2
ENSG00000171163	ZNF692	1.06084	1.95948e-07	1.04636	2.3089e-07	significant	meiosis regulator for oocyte development
ENSG00000166250	CLMP	1.05772	4.74792e-12	1.03507	3.6611e-09	significant	mitogen-activated protein kinase kinase 1
ENSG00000196517	SLC6A9	1.05741	0.0315111	0.866132	1.30682e-12	not_significant	translocase of inner mitochondrial membrane 23 homolog B
ENSG00000111845	PAK1IP1	1.05725	3.57338e-07	1.18796	0.00436749	significant	zinc finger protein 485
ENSG00000222009	BTBD19	1.05697	0.000512374	0.978922	7.13975e-16	significant	pecanex 1
ENSG00000116455	WDR77	1.05689	5.49914e-11	0.995908	3.86055e-06	significant	carnosine N-methyltransferase 1
ENSG00000139083	ETV6	1.05686	7.61602e-14	0.857024	8.56167e-06	significant	phosphatidylinositol transfer protein cytoplasmic 1
ENSG00000205534		1.05557	0.0272284	1.2026	0.102576	not_significant	metallothionein 1L, pseudogene
ENSG00000214706	IFRD2	1.05429	1.60844e-09	1.0188	0.00202568	significant	N(alpha)-acetyltransferase 15, NatA auxiliary subunit
ENSG00000119737	GPR75	1.0537	0.0175358	2.27994	7.53152e-19	significant	cyclin dependent kinase 7
ENSG00000132952	USPL1	1.05069	2.82097e-12	1.29551	0.00310389	significant	phosphofructokinase, platelet
ENSG00000164687	FABP5	1.05033	0.0120209	1.32058	3.55838e-06	not_significant	ATPase cation transporting 13A2
ENSG00000101199	ARFGAP1	1.0503	9.78702e-16	1.29974	0.00010333	significant	nuclear receptor interacting protein 1
ENSG00000179115	FARSA	1.05003	1.87299e-16	1.07058	9.20059e-06	significant	GPN-loop GTPase 1
ENSG00000267519		1.04978	2.89251e-05	1.03166	0.00532966	significant	G protein subunit gamma 11
ENSG00000124120	TTPAL	1.04946	3.17829e-16	1.014	2.24143e-08	significant	potassium channel tetramerization domain containing 5
ENSG00000082516	GEMIN5	1.04922	2.54719e-12	1.03868	7.90355e-22	significant	UDP-glucose pyrophosphorylase 2
ENSG00000074047	GLI2	1.04834	1.17746e-06	1.44334	4.4813e-19	significant	ribosomal RNA processing 8
ENSG00000170515	PA2G4	1.04819	2.40874e-12	1.0073	9.37299e-10	significant	zinc finger protein 35
ENSG00000127080	IPPK	1.04769	9.78104e-08	0.942766	2.28337e-12	significant	transcription factor 4
ENSG00000115761	NOL10	1.04727	1.39565e-33	1.08412	4.95685e-09	significant	WD repeat and FYVE domain containing 2
ENSG00000029153	ARNTL2	1.04716	0.0158418	0.955647	4.67704e-06	not_significant	tenascin C
ENSG00000100644	HIF1A	1.0462	1.12617e-14	1.41669	1.24313e-08	significant	THUMP domain containing 2
ENSG00000089195	TRMT6	1.04584	1.13815e-12	1.26202	8.16109e-05	significant	nuclear transport factor 2 like export factor 1
ENSG00000169251	NMD3	1.04544	9.10896e-19	1.30801	0.000229728	significant	serine and arginine rich splicing factor 7
ENSG00000096384	HSP90AB1	1.04466	4.33328e-26	1.11737	0.000259495	significant	small nucleolar RNA host gene 12
ENSG00000178409	BEND3	1.04306	0.00108739	1.01187	1.189e-09	significant	MIER family member 2
ENSG00000006652	IFRD1	1.04222	1.61795e-07	0.696438	2.1633e-07	significant	sperm acrosome associated 6
ENSG00000165271	NOL6	1.04115	3.36805e-10	1.20107	0.0600885	significant	polypeptide N-acetylgalactosaminyltransferase 6
ENSG00000224531	SMIM13	1.04066	1.22786e-06	1.19247	1.34026e-06	significant	calpain 15
ENSG00000166224	SGPL1	1.03993	1.93784e-12	1.26879	1.0202e-08	significant	ER degradation enhancing alpha-mannosidase like protein 1
ENSG00000162851	TFB2M	1.03975	3.98752e-14	0.988339	3.8567e-10	significant	SRP receptor subunit beta
ENSG00000157216	SSBP3	1.03925	7.49615e-27	0.724123	2.08595e-13	significant	SPT2 chromatin protein domain containing 1
ENSG00000145715	RASA1	1.03915	3.84758e-07	0.852367	5.14536e-08	significant	chondroitin sulfate synthase 1
ENSG00000100344	PNPLA3	1.03893	0.000178401	1.05353	0.0540259	significant	archaelysin family metallopeptidase 1
ENSG00000256087	ZNF432	1.03868	1.04675e-07	1.41599	3.35749e-12	significant	RNA polymerase I subunit B
ENSG00000144867	SRPRB	1.03808	1.1858e-12	1.12424	2.63119e-11	significant	BMS1 ribosome biogenesis factor
ENSG00000170345	FOS	1.03744	0.0203884	0.41481	5.02379e-05	not_significant	fascin actin-bundling protein 1
ENSG00000187957	DNER	1.0354	0.00813363	1.42195	9.3073e-05	significant	HEAT repeat containing 3
ENSG00000120742	SERP1	1.03479	1.24473e-13	1.14819	0.0414522	significant	nuclear receptor subfamily 4 group A member 2
ENSG00000171490	RSL1D1	1.03434	2.81569e-17	1.0447	1.88751e-09	significant	heat shock protein 90 alpha family class B member 1
ENSG00000107282	APBA1	1.03392	2.17987e-07	0.998349	6.70183e-08	significant	IMP U3 small nucleolar ribonucleoprotein 4
ENSG00000140280	LYSMD2	1.03267	8.49859e-05	1.4878	7.1668e-08	significant	sulfiredoxin 1
ENSG00000089159	PXN	1.03218	1.95267e-05	1.27812	2.77848e-06	significant
ENSG00000169826	CSGALNACT2	1.03203	7.80264e-08	1.09265	0.000428943	significant	ATP binding cassette subfamily E member 1
ENSG00000133216	EPHB2	1.03104	2.20496e-06	1.28777	0.276258	significant	prickle planar cell polarity protein 1
ENSG00000273038		1.03075	1.27998e-11	0.866418	1.97592e-05	significant	S100 calcium binding protein A16
ENSG00000145194	ECE2	1.02973	0.00432861	0.999091	2.79835e-38	significant	LIM domain kinase 2
ENSG00000146648	EGFR	1.02942	0.000812	0.817069	5.74727e-08	significant	RAS like proto-oncogene A
ENSG00000113013	HSPA9	1.02932	5.67484e-15	1.01808	3.30358e-07	significant	NFKB repressing factor
ENSG00000120705	ETF1	1.02704	2.62371e-20	0.914539	1.17582e-22	significant	HMG-box containing 3
ENSG00000113460	BRIX1	1.02693	2.56244e-13	0.612298	8.92688e-08	significant	fibronectin type III domain containing 3A
ENSG00000134375	TIMM17A	1.02675	1.29983e-17	1.17636	2.15299e-06	significant	solute carrier family 52 member 2
ENSG00000135723	FHOD1	1.02259	0.00746535	1.49226	3.89432e-10	significant	DEAD-box helicase 18
ENSG00000221823	PPP3R1	1.02206	1.13597e-13	0.862367	0.000336451	significant	PDZ and LIM domain 5
ENSG00000117410	ATP6V0B	1.02154	3.80986e-13	1.45832	7.07158e-07	significant
ENSG00000140859	KIFC3	1.02056	3.7747e-24	1.46453	0.208177	significant
ENSG00000156697	UTP14A	1.02022	1.22203e-12	0.999773	2.94818e-06	significant	AT-rich interaction domain 5A
ENSG00000140557	ST8SIA2	1.02011	0.0090948	0.80348	3.04285e-09	not_significant	cerebellar degeneration related protein 2 like
ENSG00000108106	UBE2S	1.01986	1.13205e-08	1.03068	5.78591e-06	not_significant	talin rod domain containing 1
ENSG00000167491	GATAD2A	1.01984	9.01804e-12	1.0851	1.24576e-08	significant	ribosomal RNA processing 9, U3 small nucleolar RNA binding protein
ENSG00000164934	DCAF13	1.01955	3.38668e-20	1.19725	7.16473e-06	significant	LRR binding FLII interacting protein 1
ENSG00000107404	DVL1	1.01826	3.25652e-07	1.40138	0.000926471	significant	heat shock protein family D (Hsp60) member 1
ENSG00000111711	GOLT1B	1.01806	1.39258e-09	1.07178	7.28218e-08	significant	WD repeat and SOCS box containing 2
ENSG00000197622	CDC42SE1	1.01754	7.94479e-05	1.31357	0.00432614	significant	TMEM189-UBE2V1 readthrough
ENSG00000234964		1.01719	0.00761531	0.823733	4.13578e-08	not_significant	chondroitin sulfate N-acetylgalactosaminyltransferase 2
ENSG00000198142	SOWAHC	1.01626	0.00057293	1.03868	5.78813e-05	significant	BRCA2 and CDKN1A interacting protein
ENSG00000165733	BMS1	1.0162	6.9653e-31	1.12069	1.93193e-05	significant	karyopherin subunit alpha 4
ENSG00000183520	UTP11	1.01604	1.40284e-18	1.00587	3.18198e-05	significant	serum/glucocorticoid regulated kinase 1
ENSG00000161547	SRSF2	1.01574	3.45547e-20	1.06066	0.0003576	significant	synaptotagmin like 3
ENSG00000130635	COL5A1	1.01507	0.00226561	1.36845	2.93988e-09	significant	nuclear FMR1 interacting protein 1
ENSG00000100731	PCNX1	1.0149	4.21959e-17	1.13904	1.38043e-06	significant	GATA zinc finger domain containing 2A
ENSG00000068878	PSME4	1.01338	9.59423e-12	1.65096	0.00106541	significant
ENSG00000140406	TLNRD1	1.01308	7.43331e-09	1.09913	1.76221e-10	significant	nucleolar protein 10
ENSG00000177150	FAM210A	1.01293	6.87782e-09	1.25764	9.09803e-14	significant	small nucleolar RNA host gene 16
ENSG00000140526	ABHD2	1.01282	6.5887e-08	-0.11634	0.000958261	not_significant	NME/NM23 nucleoside diphosphate kinase 1
ENSG00000104356	POP1	1.00618	2.31748e-09	1.01549	1.1323e-10	significant	integrator complex subunit 6
ENSG00000198841	KTI12	1.00486	1.37603e-11	1.01088	2.32896e-06	significant	ribosomal RNA processing 1B
ENSG00000120708	TGFBI	1.00365	0.00209361	1.59993	6.1096e-08	significant	ERCC excision repair 1, endonuclease non-catalytic subunit
ENSG00000107949	BCCIP	1.00301	5.30222e-16	1.09172	3.74462e-05	significant	peptidyl-tRNA hydrolase 2
ENSG00000008405	CRY1	1.00265	0.00323408	1.24096	0.0003482	significant	leucine rich repeats and WD repeat domain containing 1
ENSG00000139926	FRMD6	1.00257	1.22194e-07	1.34956	0.0010687	significant
ENSG00000155903	RASA2	1.0023	5.77408e-08	1.46083	7.41419e-06	significant	regulator of chromosome condensation 2
ENSG00000150764	DIXDC1	1.00181	1.17806e-07	0.351501	8.92814e-13	not_significant	BOLA2-SMG1P6 readthrough
ENSG00000067334	DNTTIP2	0.999415	1.04163e-18	1.05988	9.82588e-08	significant	exportin 5
ENSG00000164889	SLC4A2	0.998979	1.44203e-41	1.01809	0.000823023	significant	small nucleolar RNA host gene 3
ENSG00000151929	BAG3	0.997546	1.23579e-25	1.29879	9.71454e-08	significant	golgi transport 1B
ENSG00000180758	GPR157	0.997207	2.34392e-07	1.54304	1.47441e-06	significant	phenylalanyl-tRNA synthetase subunit alpha
ENSG00000139174	PRICKLE1	0.99714	0.0440681	1.1111	6.99288e-07	not_significant	SEC23 homolog B, coat complex II component
ENSG00000108433	GOSR2	0.997099	2.20399e-15	1.19932	1.86466e-06	significant	BCL2 antagonist/killer 1
ENSG00000127947	PTPN12	0.996295	3.35283e-10	0.87532	0.0625064	significant	long intergenic non-protein coding RNA 1426
ENSG00000068438	FTSJ1	0.994189	1.02683e-12	1.33885	8.61798e-07	significant	deoxyhypusine hydroxylase
ENSG00000181773	GPR3	0.994133	0.0192324	0.882431	2.896e-11	not_significant	NBPF member 20
ENSG00000170677	SOCS6	0.993998	4.34358e-10	1.28276	1.54254e-06	significant	UTP15 small subunit processome component
ENSG00000115641	FHL2	0.992927	4.00696e-07	1.28366	0.00123441	significant	ZNF674 antisense RNA 1 (head to head)
ENSG00000101310	SEC23B	0.991975	2.51611e-14	1.06859	1.26089e-05	significant	zinc finger protein 267
ENSG00000051108	HERPUD1	0.99148	6.8282e-08	0.574716	1.91402e-07	not_significant	INO80 complex subunit C
ENSG00000138442	WDR12	0.991325	2.28756e-10	0.894824	2.56839e-05	significant	MYC binding protein
ENSG00000175984	DENND2C	0.991128	1.38752e-06	1.64119	9.01046e-06	significant	RANBP2 like and GRIP domain containing 6
ENSG00000251349	MSANTD3-TMEFF1	0.98984	0.000215515	1.27648	3.75545e-06	significant	serine and arginine rich splicing factor 2
ENSG00000145050	MANF	0.989467	4.86623e-08	1.307	3.9178e-09	significant	cytochrome b5 domain containing 1
ENSG00000164654	MIOS	0.98941	1.82949e-14	1.14619	9.11865e-09	significant	deoxynucleotidyltransferase terminal interacting protein 2
ENSG00000116396	KCNC4	0.988312	0.000101287	1.51819	2.49148e-06	significant	MTOR associated protein, eak-7 homolog
ENSG00000176788	BASP1	0.986085	4.96365e-20	0.754723	3.61875e-06	significant	glutamine rich 2
ENSG00000189320	FAM180A	0.985152	0.0211951	0.964102	2.23153e-07	significant	UTP4 small subunit processome component
ENSG00000206190	ATP10A	0.985124	6.12422e-15	1.27269	3.2142e-05	significant	biogenesis of lysosomal organelles complex 1 subunit 3
ENSG00000101307	SIRPB1	0.984561	3.04063e-07	-0.245549	0.000813046	not_significant	small nuclear ribonucleoprotein D1 polypeptide
ENSG00000102221	JADE3	0.983756	1.50324e-09	1.95	0.00951804	significant	patatin like phospholipase domain containing 3
ENSG00000111696	NT5DC3	0.983601	0.000111156	0.983805	0.0143039	significant	heme oxygenase 1
ENSG00000153989	NUS1	0.983339	8.98417e-16	1.23458	6.16227e-11	significant	G-rich RNA sequence binding factor 1
ENSG00000135324	MRAP2	0.981307	0.0457257	0.127219	1.37723e-07	not_significant	ring finger and CHY zinc finger domain containing 1
ENSG00000272476		0.981136	2.60461e-05	1.20492	0.0519047	significant	ring finger protein 227
ENSG00000198855	FICD	0.980815	0.000163286	0.905827	0.01822	significant
ENSG00000115053	NCL	0.980782	2.4214e-16	1.03246	5.81831e-06	significant	eukaryotic translation initiation factor 1A domain containing
ENSG00000075391	RASAL2	0.980077	1.08318e-08	0.915067	9.77185e-12	significant	Yip1 domain family member 5
ENSG00000143153	ATP1B1	0.97942	0.00100853	1.27151	7.5336e-07	significant	caveolae associated protein 1
ENSG00000183336	BOLA2	0.978735	0.0016078	0.436255	8.00019e-08	not_significant	AMMECR1 like
ENSG00000125633	CCDC93	0.97872	6.66583e-11	1.29393	6.52697e-07	significant	CKLF like MARVEL transmembrane domain containing 7
ENSG00000100284	TOM1	0.976993	3.95915e-13	1.04003	1.08727e-06	significant	zinc finger protein 692
ENSG00000114423	CBLB	0.976588	0.000823077	0.379511	7.06191e-08	not_significant	SH3 domain containing kinase binding protein 1
ENSG00000176915	ANKLE2	0.975201	4.83183e-22	1.3515	2.22288e-09	significant	leucine zipper and EF-hand containing transmembrane protein 1
ENSG00000111252	SH2B3	0.974579	0.00310997	0.904247	0.000199636	significant	NudC domain containing 1
ENSG00000165724	ZMYND19	0.974044	6.81933e-06	0.91793	1.23116e-14	significant	ribosomal L1 domain containing 1
ENSG00000119446	RBM18	0.973963	5.7086e-10	0.854216	0.000107884	significant	forkhead box P4
ENSG00000213694	S1PR3	0.973854	0.00179512	-0.575969	3.54338e-07	not_significant	BCL2 family apoptosis regulator BOK
ENSG00000213341	CHUK	0.973611	1.29232e-20	0.780083	8.39764e-05	significant	target of myb1 membrane trafficking protein
ENSG00000186416	NKRF	0.973299	2.69225e-07	1.10637	0.00866983	significant	PALM2-AKAP2 readthrough
ENSG00000142634	EFHD2	0.973174	1.83846e-07	0.930839	1.14854e-06	significant	sosondowah ankyrin repeat domain family member C
ENSG00000164134	NAA15	0.972819	5.56078e-13	1.13415	2.01137e-10	significant	gem nuclear organelle associated protein 5
ENSG00000261061		0.972599	0.00175004	1.2651	1.94113e-08	significant	tRNA methyltransferase 10C, mitochondrial RNase P subunit
ENSG00000075711	DLG1	0.97231	2.75087e-11	0.632172	0.0412918	significant
ENSG00000091527	CDV3	0.972298	1.2598e-08	0.935841	6.00389e-13	significant	CXADR like membrane protein
ENSG00000125485	DDX31	0.971092	4.13776e-09	1.21745	5.41162e-09	significant	NADH:ubiquinone oxidoreductase complex assembly factor 4
ENSG00000134697	GNL2	0.969594	3.40947e-22	0.921171	0.00502834	significant	TNF alpha induced protein 8 like 3
ENSG00000272599		0.969399	0.0419974	0.748335	0.000210029	not_significant	forkhead box D1
ENSG00000124789	NUP153	0.969092	1.69207e-18	0.818537	4.27784e-07	significant	nucleolin
ENSG00000183023	SLC8A1	0.968067	0.00364136	0.497684	2.49305e-07	not_significant
ENSG00000160218	TRAPPC10	0.968045	1.80371e-22	1.21605	9.90386e-09	significant	eukaryotic translation initiation factor 3 subunit B
ENSG00000140650	PMM2	0.96725	2.57316e-15	1.15546	0.101413	significant	ubiquitin conjugating enzyme E2 S
ENSG00000186908	ZDHHC17	0.966926	3.03182e-10	1.00483	0.0118065	significant	V-set and transmembrane domain containing 2 like
ENSG00000173546	CSPG4	0.966832	0.0002743	1.16748	5.49697e-07	significant	solute carrier family 30 member 7
ENSG00000153551	CMTM7	0.966024	1.27884e-05	1.04657	0.0940643	significant	plakophilin 3
ENSG00000174106	LEMD3	0.965977	9.82735e-10	1.354	4.39679e-05	significant
ENSG00000198498	TMA16	0.96511	1.27919e-10	0.715836	2.55551e-08	significant	RIO kinase 2
ENSG00000144233	AMMECR1L	0.9642	2.10604e-09	1.0473	1.64186e-10	significant	transmembrane protein 39A
ENSG00000124383	MPHOSPH10	0.963619	2.20771e-25	1.2007	0.0166243	significant	RANBP2 like and GRIP domain containing 8
ENSG00000157985	AGAP1	0.963293	1.15456e-11	0.824357	5.97435e-05	significant	TDP-glucose 4,6-dehydratase
ENSG00000166002	SMCO4	0.962657	0.000239232	1.19349	3.91277e-07	significant	NOP14 nucleolar protein
ENSG00000135316	SYNCRIP	0.962301	3.60572e-22	0.973735	0.000436987	significant	RAN, member RAS oncogene family
ENSG00000136718	IMP4	0.962048	2.24808e-13	1.117	3.30358e-05	significant	interferon related developmental regulator 2
ENSG00000112658	SRF	0.961884	9.52854e-05	1.32038	0.0773713	significant
ENSG00000132185	FCRLA	0.961717	0.000221467	0.789009	5.36068e-21	not_significant	solute carrier family 4 member 2
ENSG00000169398	PTK2	0.96069	3.26536e-32	0.94802	8.66432e-07	significant	heat shock protein family A (Hsp70) member 9
ENSG00000108551	RASD1	0.960024	0.0242534	1.66751	0.00176503	significant
ENSG00000120800	UTP20	0.959795	2.27113e-08	1.19937	8.64489e-08	significant	UTP3 small subunit processome component
ENSG00000171316	CHD7	0.95972	0.000245596	1.86363	2.98069e-07	significant	coiled-coil domain containing 58
ENSG00000155393	HEATR3	0.959347	1.24084e-12	1.11941	2.85039e-06	significant	synoviolin 1
[truncated: 3,676 more rows]
