# Supplementary figures and images for: Mutations in SKI in Shprintzen–Goldberg syndrome lead to attenuated TGF-β responses through SKI stabilization
Source: eLife journal article supplement (doi:10.7554/elife.63545), 2021-01-08

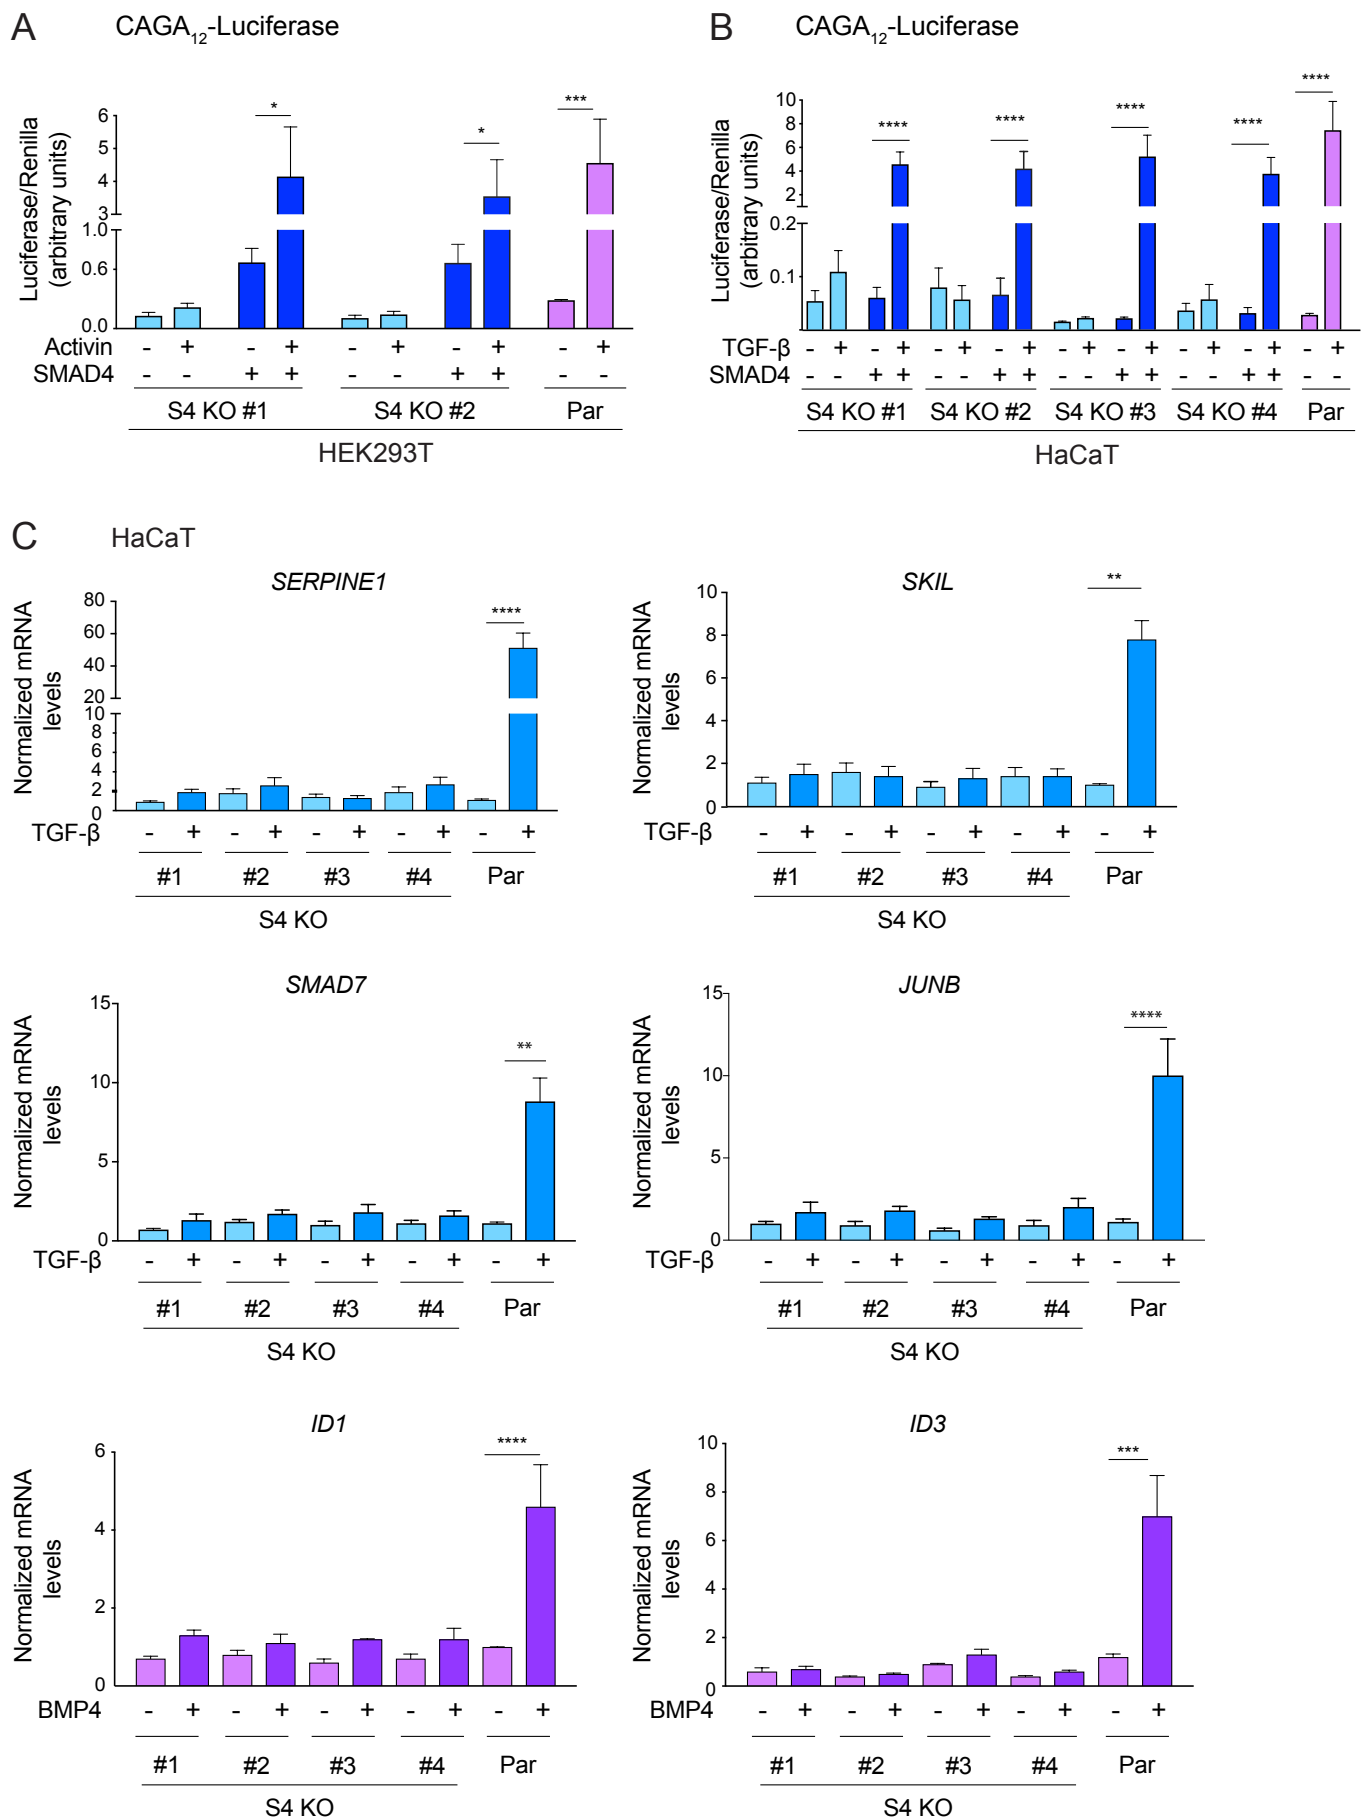

Figure 1 Supplement 1

Supplement: supp [file elife-63545-supp-v1.zip › elife_poa_e63545_Figure_1_figure_supplement_1.pdf]

A

CAGA<sub>12</sub>-Luciferase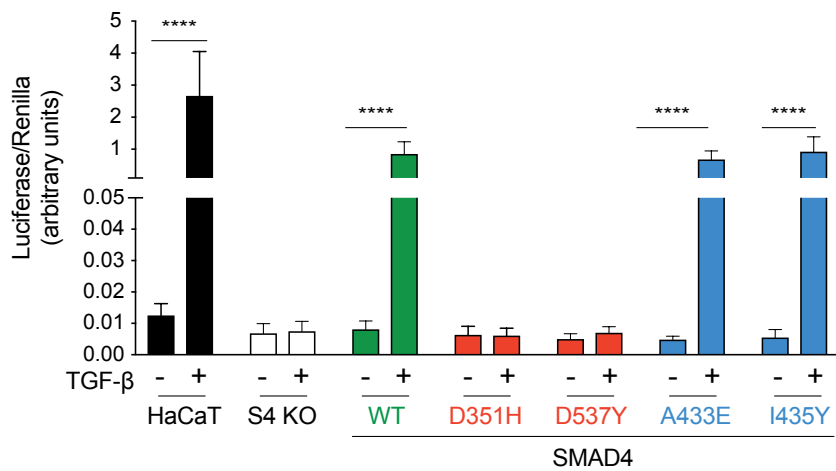

B

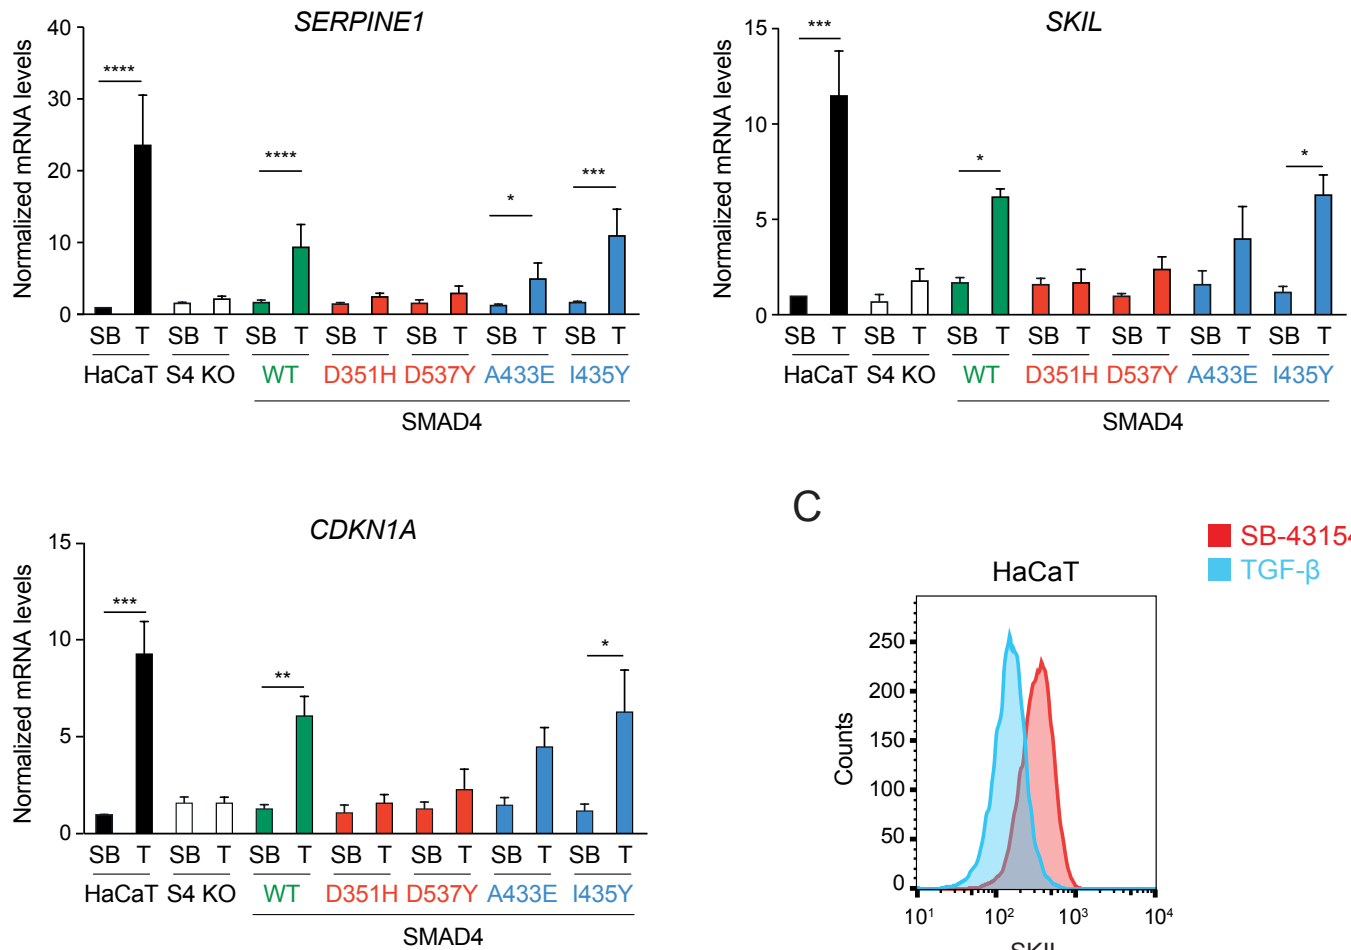

C

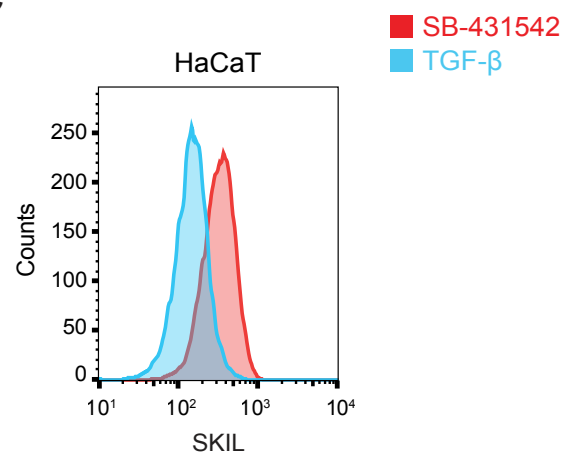

Figure 2 Supplement 1

Supplement: supp [file elife-63545-supp-v1.zip › elife_poa_e63545_Figure_2_figure_supplement_1.pdf]

A

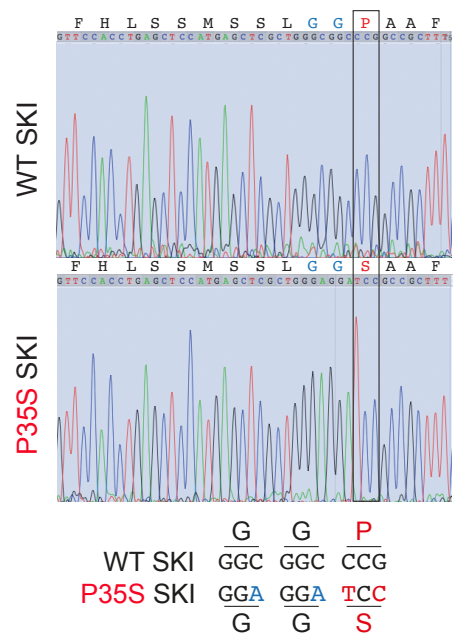

B

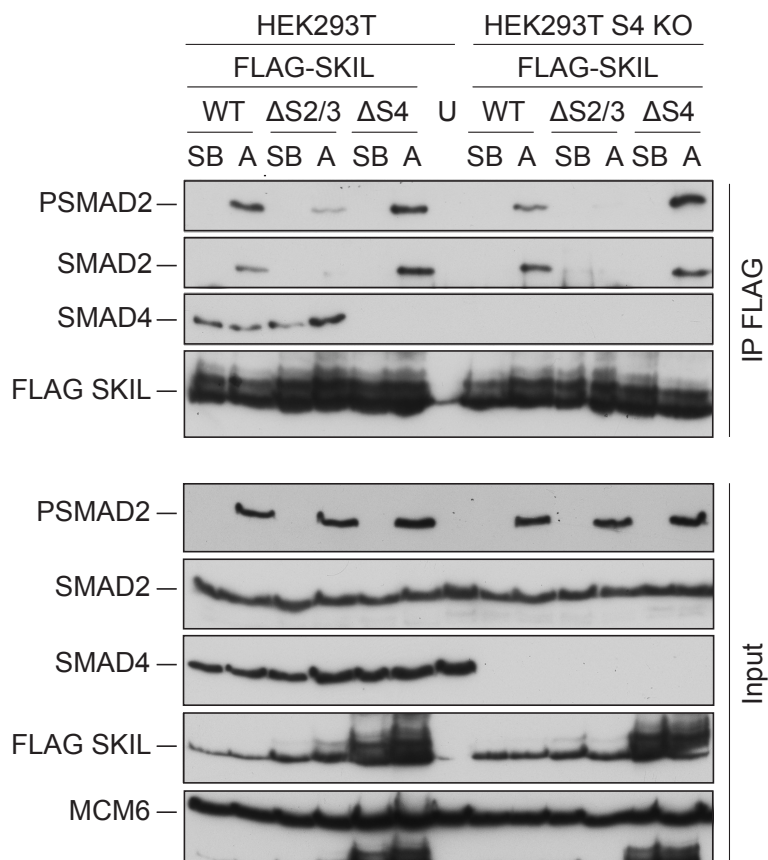

C

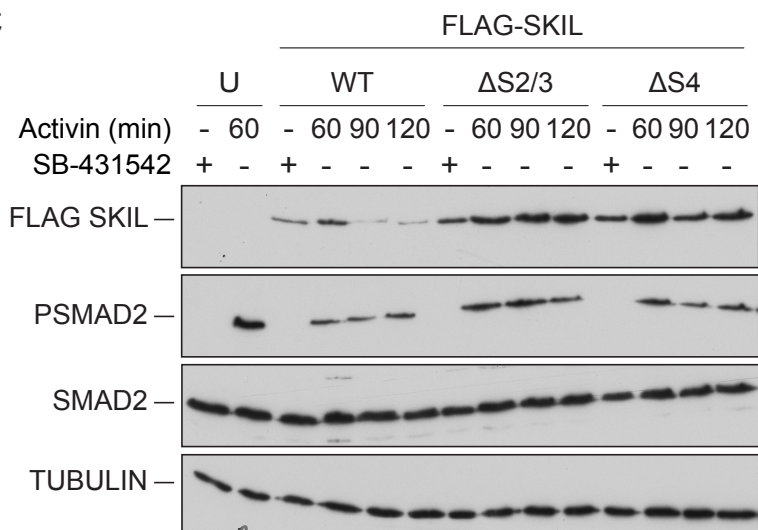

Figure 6 Supplement 1

Supplement: supp [file elife-63545-supp-v1.zip › elife_poa_e63545_Figure_6_figure_supplement_1.pdf]

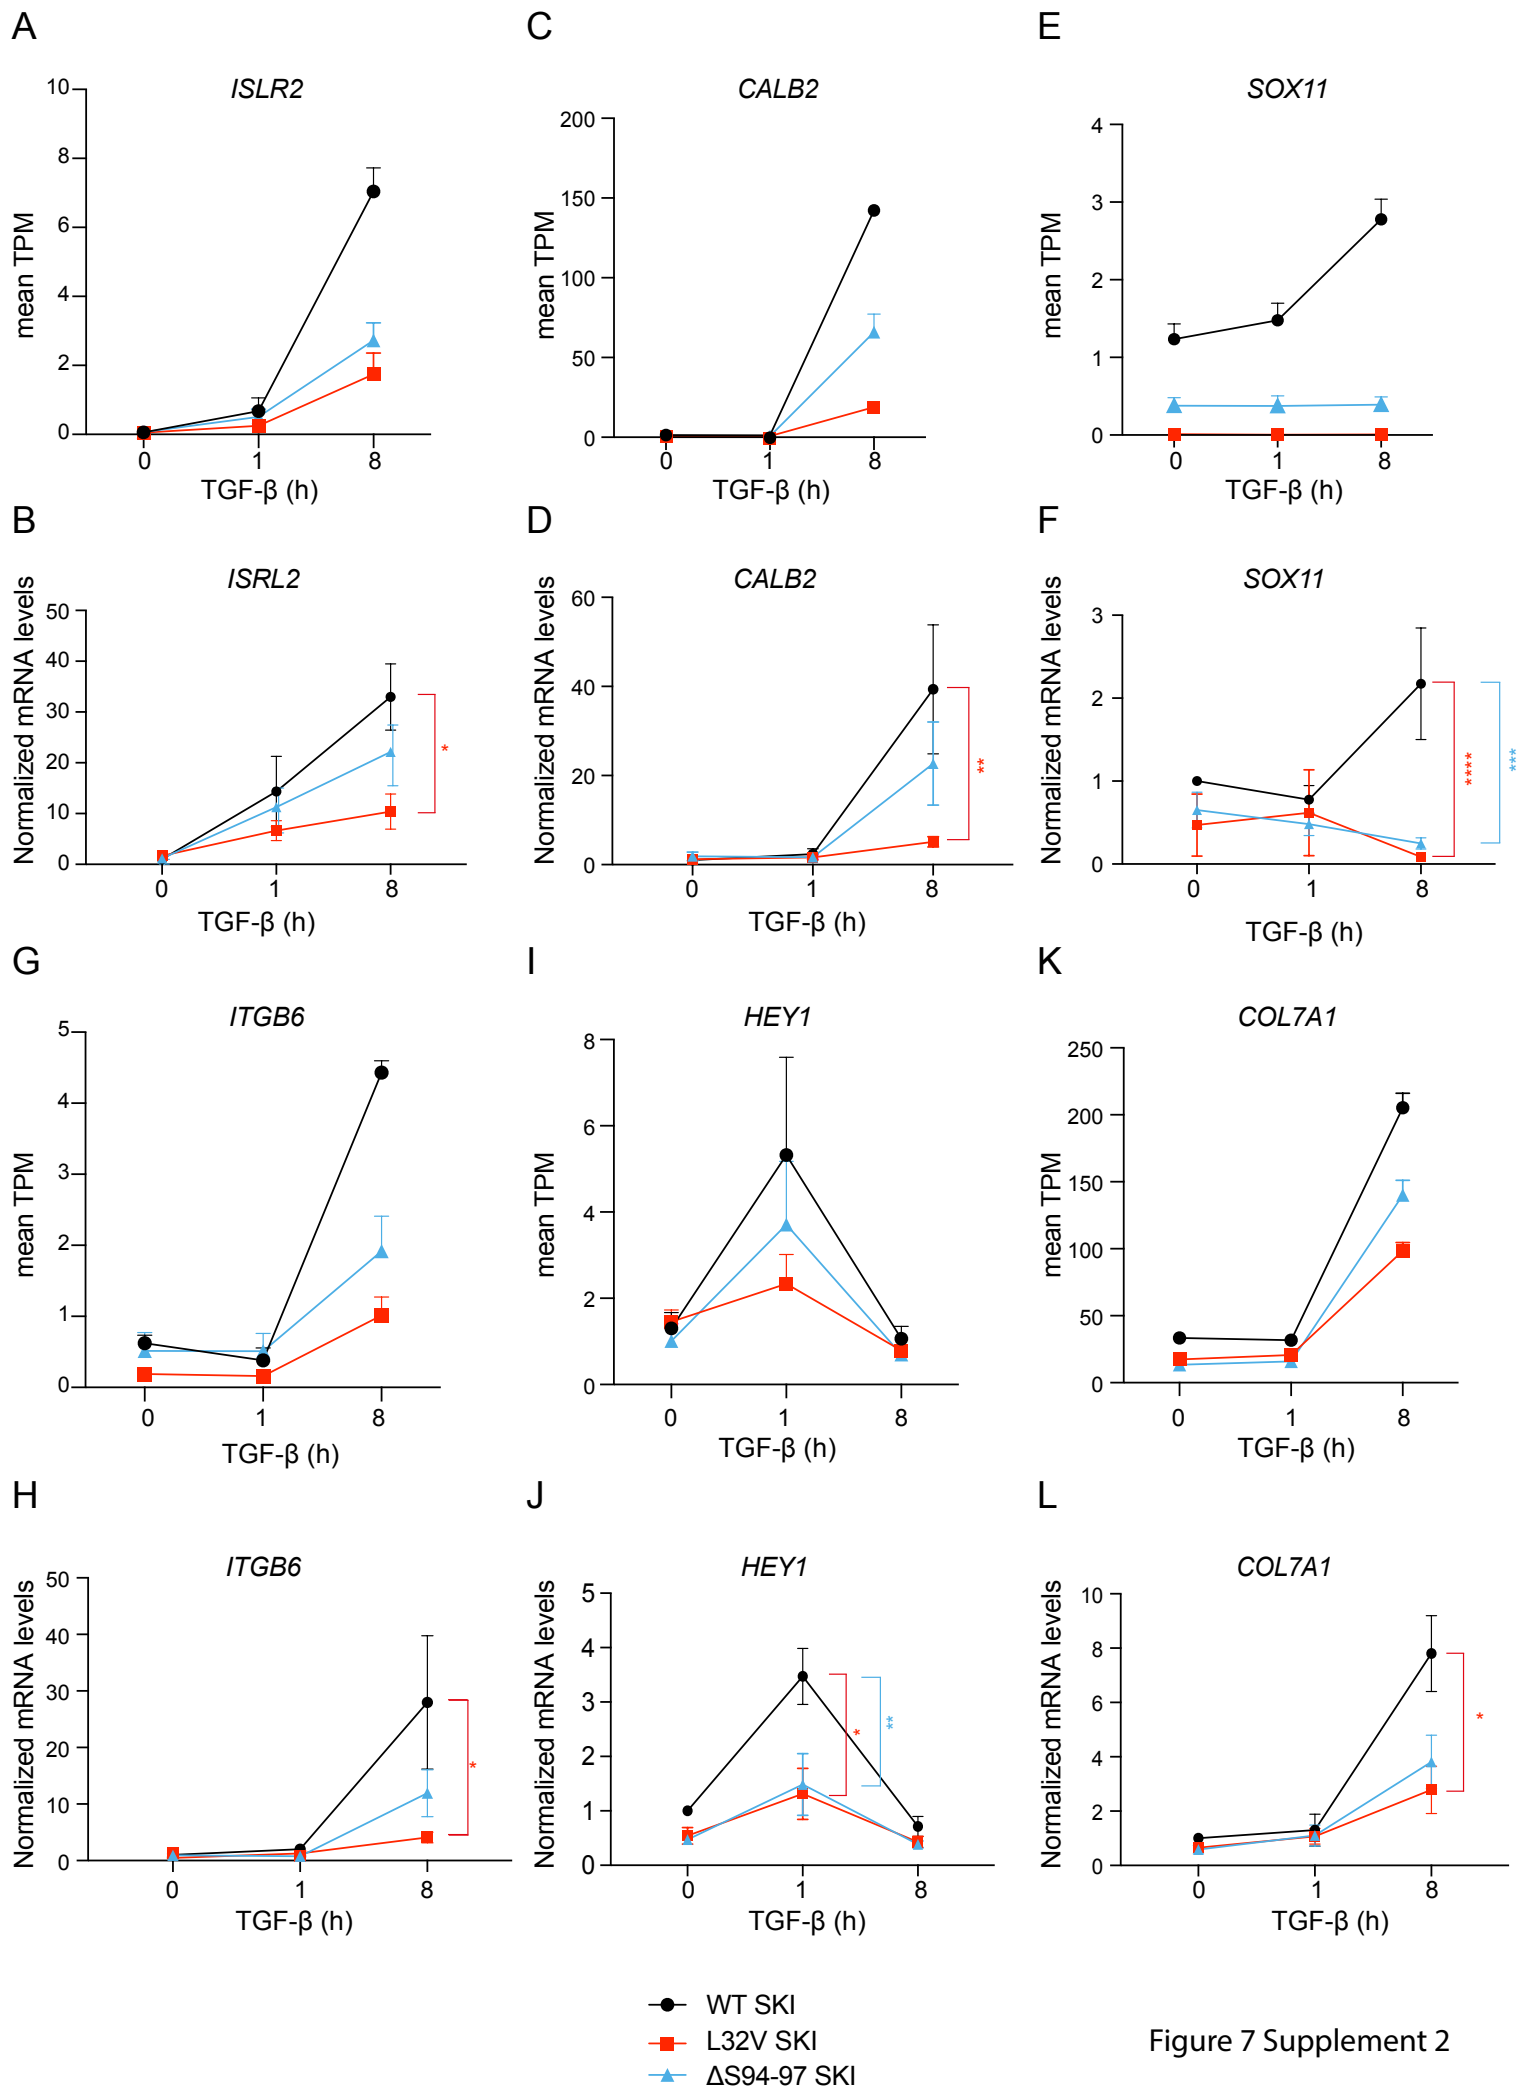

Figure 7 Supplement 2

Supplement: supp [file elife-63545-supp-v1.zip › elife_poa_e63545_Figure_7_figure_supplement_2.pdf]
